# Supplementary material
Source: MDPI journal article supplement (https://www.mdpi.com/2072-4292/15/6/1512)
Supplement: s1 [file s1]

Archive with 5 entries (5 files):
- MDPI_basic_demo.mp4
- MDPI_improved_demo.mp4
- Parameter tuning basic method.xlsx
- Parameter tuning improved method.xlsx
- remotesensing-2203434-supplementary.pdf
