# Supplementary material
Source: MDPI journal article supplement (https://www.mdpi.com/2072-4292/15/6/1512)
Supplement: s1 [file s1 › Parameter tuning basic method.xlsx]

## Sheet: Flight 1
FLIGHT Nr.	Encounter	Window size W	t_p [s]	D_LIM [m]	Vsc scale k_V	Distance with firm braking [m]	Distance with emergency braking [m]	DNT (maxT) [s]	Safe (0), Danger (1)
1	1	3	1	2	2	-2.0068	-0.0888432	0	1
1	1	3	1	2	4	0	0	0	0
1	1	3	1	2	6	0	0	0	0
1	1	3	1	2	8	0	0	0	0
1	1	3	1	4	2	-1.39111	-0.287244	0.10001	1
1	1	3	1	4	4	-2.0068	-0.0888432	0	1
1	1	3	1	4	6	-2.27204	-0.17402	0	1
1	1	3	1	4	8	0	0	0	0
1	1	3	1	6	2	6.99092	8.51007	1.39959	1
1	1	3	1	6	4	-1.39111	-0.287244	0.10001	1
1	1	3	1	6	6	-2.0068	-0.0888432	0	1
1	1	3	1	6	8	-2.27204	-0.17402	0	1
1	1	3	1.5	2	2	-1.39111	-0.287244	0	1
1	1	3	1.5	2	4	-2.27204	-0.17402	0	1
1	1	3	1.5	2	6	-2.27204	-0.17402	0	1
1	1	3	1.5	2	8	0	0	0	0
1	1	3	1.5	4	2	6.99092	8.51007	0.29993	1
1	1	3	1.5	4	4	-1.39111	-0.287244	0	1
1	1	3	1.5	4	6	-2.0068	-0.0888432	0	1
1	1	3	1.5	4	8	-2.27204	-0.17402	0	1
1	1	3	1.5	6	2	6.99092	8.51007	1.39959	1
1	1	3	1.5	6	4	-1.39111	-0.287244	0.10001	1
1	1	3	1.5	6	6	-1.39111	-0.287244	0	1
1	1	3	1.5	6	8	-2.0068	-0.0888432	0	1
1	1	3	2	2	2	-1.39111	-0.287244	0.09994	1
1	1	3	2	2	4	-2.0068	-0.0888432	0	1
1	1	3	2	2	6	-2.0068	-0.0888432	0	1
1	1	3	2	2	8	-2.0068	-0.0888432	0	1
1	1	3	2	4	2	6.99092	8.51007	0.29993	1
1	1	3	2	4	4	-1.39111	-0.287244	0.09994	1
1	1	3	2	4	6	-1.39111	-0.287244	0	1
1	1	3	2	4	8	-2.0068	-0.0888432	0	1
1	1	3	2	6	2	6.99092	8.51007	1.39959	1
1	1	3	2	6	4	6.99092	8.51007	0.10001	1
1	1	3	2	6	6	-1.39111	-0.287244	0.09994	1
1	1	3	2	6	8	-1.39111	-0.287244	0	1
1	1	3	2.5	2	2	6.99092	8.51007	0.10001	1
1	1	3	2.5	2	4	-1.39111	-0.287244	0	1
1	1	3	2.5	2	6	-2.0068	-0.0888432	0	1
1	1	3	2.5	2	8	-2.0068	-0.0888432	0	1
1	1	3	2.5	4	2	6.99092	8.51007	0.29993	1
1	1	3	2.5	4	4	6.99092	8.51007	0.10001	1
1	1	3	2.5	4	6	-1.39111	-0.287244	0	1
1	1	3	2.5	4	8	-1.39111	-0.287244	0	1
1	1	3	2.5	6	2	6.99092	8.51007	1.39959	1
1	1	3	2.5	6	4	6.99092	8.51007	0.2999	1
1	1	3	2.5	6	6	6.99092	8.51007	0.10001	1
1	1	3	2.5	6	8	-1.39111	-0.287244	0.09994	1
1	1	4	1	2	2	0	0	0	0
1	1	4	1	2	4	0	0	0	0
1	1	4	1	2	6	0	0	0	0
1	1	4	1	2	8	0	0	0	0
1	1	4	1	4	2	3.86232	4.64804	0.39985	1
1	1	4	1	4	4	0	0	0	0
1	1	4	1	4	6	0	0	0	0
1	1	4	1	4	8	0	0	0	0
1	1	4	1	6	2	5.44885	7.14642	1.89943	1
1	1	4	1	6	4	5.9281	6.20257	0.19997	1
1	1	4	1	6	6	0	0	0	0
1	1	4	1	6	8	0	0	0	0
1	1	4	1.5	2	2	5.9281	6.20257	0	1
1	1	4	1.5	2	4	0	0	0	0
1	1	4	1.5	2	6	0	0	0	0
1	1	4	1.5	2	8	0	0	0	0
1	1	4	1.5	4	2	4.88548	6.41876	1.19964	1
1	1	4	1.5	4	4	5.9281	6.20257	0	1
1	1	4	1.5	4	6	0	0	0	0
1	1	4	1.5	4	8	0	0	0	0
1	1	4	1.5	6	2	3.68605	6.08051	1.89943	1
1	1	4	1.5	6	4	3.86232	4.64804	0.19997	1
1	1	4	1.5	6	6	5.9281	6.20257	0	1
1	1	4	1.5	6	8	0	0	0	0
1	1	4	2	2	2	5.9281	6.20257	0.09999	1
1	1	4	2	2	4	5.9281	6.20257	0	1
1	1	4	2	2	6	0	0	0	0
1	1	4	2	2	8	0	0	0	0
1	1	4	2	4	2	5.44885	7.14642	1.29959	1
1	1	4	2	4	4	5.9281	6.20257	0.09999	1
1	1	4	2	4	6	5.9281	6.20257	0	1
1	1	4	2	4	8	5.9281	6.20257	0	1
1	1	4	2	6	2	3.68605	6.08051	2.39924	1
1	1	4	2	6	4	4.88548	6.41876	0.39989	1
1	1	4	2	6	6	5.9281	6.20257	0.09999	1
1	1	4	2	6	8	5.9281	6.20257	0	1
1	1	4	2.5	2	2	3.86232	4.64804	0.09999	1
1	1	4	2.5	2	4	5.9281	6.20257	0	1
1	1	4	2.5	2	6	5.9281	6.20257	0	1
1	1	4	2.5	2	8	5.9281	6.20257	0	1
1	1	4	2.5	4	2	3.68605	6.08051	1.29959	1
1	1	4	2.5	4	4	3.86232	4.64804	0.09999	1
1	1	4	2.5	4	6	5.9281	6.20257	0	1
1	1	4	2.5	4	8	5.9281	6.20257	0	1
1	1	4	2.5	6	2	3.68605	6.08051	2.39924	1
1	1	4	2.5	6	4	5.44885	7.14642	0.69975	1
1	1	4	2.5	6	6	3.86232	4.64804	0.09999	1
1	1	4	2.5	6	8	5.9281	6.20257	0	1
1	1	5	1	2	2	0	0	0	0
1	1	5	1	2	4	0	0	0	0
1	1	5	1	2	6	0	0	0	0
1	1	5	1	2	8	0	0	0	0
1	1	5	1	4	2	4.91528	5.5712	1.09964	1
1	1	5	1	4	4	0	0	0	0
1	1	5	1	4	6	0	0	0	0
1	1	5	1	4	8	0	0	0	0
1	1	5	1	6	2	4.70742	6.3143	3.39893	1
1	1	5	1	6	4	4.9694	5.44348	0	1
1	1	5	1	6	6	0	0	0	0
1	1	5	1	6	8	0	0	0	0
1	1	5	1.5	2	2	0	0	0	0
1	1	5	1.5	2	4	0	0	0	0
1	1	5	1.5	2	6	0	0	0	0
1	1	5	1.5	2	8	0	0	0	0
1	1	5	1.5	4	2	4.70742	6.3143	1.69948	1
1	1	5	1.5	4	4	0	0	0	0
1	1	5	1.5	4	6	0	0	0	0
1	1	5	1.5	4	8	0	0	0	0
1	1	5	1.5	6	2	3.46498	5.73017	4.39866	1
1	1	5	1.5	6	4	6.20588	6.57114	0.29991	1
1	1	5	1.5	6	6	0	0	0	0
1	1	5	1.5	6	8	0	0	0	0
1	1	5	2	2	2	5.66309	6.07407	0	1
1	1	5	2	2	4	0	0	0	0
1	1	5	2	2	6	0	0	0	0
1	1	5	2	2	8	0	0	0	0
1	1	5	2	4	2	4.70742	6.3143	1.79943	1
1	1	5	2	4	4	5.66309	6.07407	0	1
1	1	5	2	4	6	0	0	0	0
1	1	5	2	4	8	0	0	0	0
1	1	5	2	6	2	3.46498	5.73017	4.39866	1
1	1	5	2	6	4	4.70742	6.3143	1.19964	1
1	1	5	2	6	6	5.66309	6.07407	0	1
1	1	5	2	6	8	0	0	0	0
1	1	5	2.5	2	2	5.66309	6.07407	0.09996	1
1	1	5	2.5	2	4	0	0	0	0
1	1	5	2.5	2	6	0	0	0	0
1	1	5	2.5	2	8	0	0	0	0
1	1	5	2.5	4	2	3.46498	5.73017	2.79916	1
1	1	5	2.5	4	4	5.66309	6.07407	0.09996	1
1	1	5	2.5	4	6	0	0	0	0
1	1	5	2.5	4	8	0	0	0	0
1	1	5	2.5	6	2	3.46498	5.73017	4.39866	1
1	1	5	2.5	6	4	4.70742	6.3143	1.19964	1
1	1	5	2.5	6	6	5.66309	6.07407	0.09996	1
1	1	5	2.5	6	8	5.66309	6.07407	0	1
1	1	6	1	2	2	0	0	0	0
1	1	6	1	2	4	0	0	0	0
1	1	6	1	2	6	0	0	0	0
1	1	6	1	2	8	0	0	0	0
1	1	6	1	4	2	5.10553	5.65995	1.59949	1
1	1	6	1	4	4	0	0	0	0
1	1	6	1	4	6	0	0	0	0
1	1	6	1	4	8	0	0	0	0
1	1	6	1	6	2	3.26173	5.3092	3.39893	1
1	1	6	1	6	4	5.32025	5.76943	0	1
1	1	6	1	6	6	0	0	0	0
1	1	6	1	6	8	0	0	0	0
1	1	6	1.5	2	2	0	0	0	0
1	1	6	1.5	2	4	0	0	0	0
1	1	6	1.5	2	6	0	0	0	0
1	1	6	1.5	2	8	0	0	0	0
1	1	6	1.5	4	2	3.50589	5.29563	1.79944	1
1	1	6	1.5	4	4	0	0	0	0
1	1	6	1.5	4	6	0	0	0	0
1	1	6	1.5	4	8	0	0	0	0
1	1	6	1.5	6	2	3.26173	5.3092	4.29867	1
1	1	6	1.5	6	4	5.95643	6.35265	0.9997	1
1	1	6	1.5	6	6	0	0	0	0
1	1	6	1.5	6	8	0	0	0	0
1	1	6	2	2	2	5.32025	5.76943	0	1
1	1	6	2	2	4	0	0	0	0
1	1	6	2	2	6	0	0	0	0
1	1	6	2	2	8	0	0	0	0
1	1	6	2	4	2	3.26173	5.3092	1.89939	1
1	1	6	2	4	4	5.32025	5.76943	0	1
1	1	6	2	4	6	0	0	0	0
1	1	6	2	4	8	0	0	0	0
1	1	6	2	6	2	3.26173	5.3092	4.29867	1
1	1	6	2	6	4	3.50589	5.29563	1.69948	1
1	1	6	2	6	6	5.32025	5.76943	0	1
1	1	6	2	6	8	0	0	0	0
1	1	6	2.5	2	2	5.77326	6.15136	0.09996	1
1	1	6	2.5	2	4	0	0	0	0
1	1	6	2.5	2	6	0	0	0	0
1	1	6	2.5	2	8	0	0	0	0
1	1	6	2.5	4	2	3.26173	5.3092	2.79913	1
1	1	6	2.5	4	4	5.77326	6.15136	0.09996	1
1	1	6	2.5	4	6	5.32025	5.76943	0	1
1	1	6	2.5	4	8	0	0	0	0
1	1	6	2.5	6	2	3.26173	5.3092	4.29867	1
1	1	6	2.5	6	4	3.26173	5.3092	1.69948	1
1	1	6	2.5	6	6	5.77326	6.15136	0.09996	1
1	1	6	2.5	6	8	5.32025	5.76943	0	1
1	1	7	1	2	2	0	0	0	0
1	1	7	1	2	4	0	0	0	0
1	1	7	1	2	6	0	0	0	0
1	1	7	1	2	8	0	0	0	0
1	1	7	1	4	2	5.14797	5.68292	1.49952	1
1	1	7	1	4	4	0	0	0	0
1	1	7	1	4	6	0	0	0	0
1	1	7	1	4	8	0	0	0	0
1	1	7	1	6	2	2.56633	4.65106	4.19868	1
1	1	7	1	6	4	5.83494	6.15371	0.09994	1
1	1	7	1	6	6	0	0	0	0
1	1	7	1	6	8	0	0	0	0
1	1	7	1.5	2	2	0	0	0	0
1	1	7	1.5	2	4	0	0	0	0
1	1	7	1.5	2	6	0	0	0	0
1	1	7	1.5	2	8	0	0	0	0
1	1	7	1.5	4	2	1.27665	2.65764	1.89938	1
1	1	7	1.5	4	4	0	0	0	0
1	1	7	1.5	4	6	0	0	0	0
1	1	7	1.5	4	8	0	0	0	0
1	1	7	1.5	6	2	2.56633	4.65106	4.19868	1
1	1	7	1.5	6	4	5.14797	5.68292	0.89972	1
1	1	7	1.5	6	6	0	0	0	0
1	1	7	1.5	6	8	0	0	0	0
1	1	7	2	2	2	5.83494	6.15371	0	1
1	1	7	2	2	4	0	0	0	0
1	1	7	2	2	6	0	0	0	0
1	1	7	2	2	8	0	0	0	0
1	1	7	2	4	2	2.56633	4.65106	2.79908	1
1	1	7	2	4	4	5.83494	6.15371	0	1
1	1	7	2	4	6	0	0	0	0
1	1	7	2	4	8	0	0	0	0
1	1	7	2	6	2	2.56633	4.65106	4.19868	1
1	1	7	2	6	4	1.27665	2.65764	1.69948	1
1	1	7	2	6	6	5.83494	6.15371	0	1
1	1	7	2	6	8	0	0	0	0
1	1	7	2.5	2	2	5.83494	6.15371	0	1
1	1	7	2.5	2	4	0	0	0	0
1	1	7	2.5	2	6	0	0	0	0
1	1	7	2.5	2	8	0	0	0	0
1	1	7	2.5	4	2	2.56633	4.65106	2.79908	1
1	1	7	2.5	4	4	5.83494	6.15371	0	1
1	1	7	2.5	4	6	5.73137	6.07556	0	1
1	1	7	2.5	4	8	0	0	0	0
1	1	7	2.5	6	2	2.56633	4.65106	4.19868	1
1	1	7	2.5	6	4	2.56633	4.65106	1.69948	1
1	1	7	2.5	6	6	5.83494	6.15371	0	1
1	1	7	2.5	6	8	5.73137	6.07556	0	1
1	1	8	1	2	2	0	0	0	0
1	1	8	1	2	4	0	0	0	0
1	1	8	1	2	6	0	0	0	0
1	1	8	1	2	8	0	0	0	0
1	1	8	1	4	2	4.23265	4.94476	1.69945	1
1	1	8	1	4	4	0	0	0	0
1	1	8	1	4	6	0	0	0	0
1	1	8	1	4	8	0	0	0	0
1	1	8	1	6	2	2.00563	4.1738	4.1987	1
1	1	8	1	6	4	5.97053	6.24019	0.49985	1
1	1	8	1	6	6	0	0	0	0
1	1	8	1	6	8	0	0	0	0
1	1	8	1.5	2	2	0	0	0	0
1	1	8	1.5	2	4	0	0	0	0
1	1	8	1.5	2	6	0	0	0	0
1	1	8	1.5	2	8	0	0	0	0
1	1	8	1.5	4	2	0.619418	2.17397	1.99937	1
1	1	8	1.5	4	4	0	0	0	0
1	1	8	1.5	4	6	0	0	0	0
1	1	8	1.5	4	8	0	0	0	0
1	1	8	1.5	6	2	2.00563	4.1738	4.1987	1
1	1	8	1.5	6	4	5.23287	5.70321	1.09963	1
1	1	8	1.5	6	6	0	0	0	0
1	1	8	1.5	6	8	0	0	0	0
1	1	8	2	2	2	5.23287	5.70321	0	1
1	1	8	2	2	4	0	0	0	0
1	1	8	2	2	6	0	0	0	0
1	1	8	2	2	8	0	0	0	0
1	1	8	2	4	2	2.00563	4.1738	2.79911	1
1	1	8	2	4	4	5.23287	5.70321	0	1
1	1	8	2	4	6	0	0	0	0
1	1	8	2	4	8	0	0	0	0
1	1	8	2	6	2	2.00563	4.1738	4.1987	1
1	1	8	2	6	4	2.3126	3.48155	1.49952	1
1	1	8	2	6	6	5.23287	5.70321	0	1
1	1	8	2	6	8	0	0	0	0
1	1	8	2.5	2	2	5.23287	5.70321	0	1
1	1	8	2.5	2	4	0	0	0	0
1	1	8	2.5	2	6	0	0	0	0
1	1	8	2.5	2	8	0	0	0	0
1	1	8	2.5	4	2	2.00563	4.1738	2.79911	1
1	1	8	2.5	4	4	5.23287	5.70321	0	1
1	1	8	2.5	4	6	0	0	0	0
1	1	8	2.5	4	8	0	0	0	0
1	1	8	2.5	6	2	2.00563	4.1738	4.1987	1
1	1	8	2.5	6	4	2.00563	4.1738	1.59952	1
1	1	8	2.5	6	6	5.23287	5.70321	0	1
1	1	8	2.5	6	8	0	0	0	0
1	1	9	1	2	2	0	0	0	0
1	1	9	1	2	4	0	0	0	0
1	1	9	1	2	6	0	0	0	0
1	1	9	1	2	8	0	0	0	0
1	1	9	1	4	2	3.51967	4.38405	1.69945	1
1	1	9	1	4	4	0	0	0	0
1	1	9	1	4	6	0	0	0	0
1	1	9	1	4	8	0	0	0	0
1	1	9	1	6	2	1.44902	3.5111	4.09873	1
1	1	9	1	6	4	5.59528	5.99133	0.19995	1
1	1	9	1	6	6	0	0	0	0
1	1	9	1	6	8	0	0	0	0
1	1	9	1.5	2	2	0	0	0	0
1	1	9	1.5	2	4	0	0	0	0
1	1	9	1.5	2	6	0	0	0	0
1	1	9	1.5	2	8	0	0	0	0
1	1	9	1.5	4	2	-0.357773	1.66791	1.99937	1
1	1	9	1.5	4	4	0	0	0	0
1	1	9	1.5	4	6	0	0	0	0
1	1	9	1.5	4	8	0	0	0	0
1	1	9	1.5	6	2	1.44902	3.5111	4.09873	1
1	1	9	1.5	6	4	4.46844	5.07486	1.19959	1
1	1	9	1.5	6	6	0	0	0	0
1	1	9	1.5	6	8	0	0	0	0
1	1	9	2	2	2	0	0	0	0
1	1	9	2	2	4	0	0	0	0
1	1	9	2	2	6	0	0	0	0
1	1	9	2	2	8	0	0	0	0
1	1	9	2	4	2	1.44902	3.5111	2.69914	1
1	1	9	2	4	4	0	0	0	0
1	1	9	2	4	6	0	0	0	0
1	1	9	2	4	8	0	0	0	0
1	1	9	2	6	2	1.44902	3.5111	4.09873	1
1	1	9	2	6	4	2.77902	3.83067	1.39957	1
1	1	9	2	6	6	0	0	0	0
1	1	9	2	6	8	0	0	0	0
1	1	9	2.5	2	2	5.89411	6.20677	0	1
1	1	9	2.5	2	4	0	0	0	0
1	1	9	2.5	2	6	0	0	0	0
1	1	9	2.5	2	8	0	0	0	0
1	1	9	2.5	4	2	1.44902	3.5111	2.69914	1
1	1	9	2.5	4	4	5.89411	6.20677	0	1
1	1	9	2.5	4	6	0	0	0	0
1	1	9	2.5	4	8	0	0	0	0
1	1	9	2.5	6	2	1.44902	3.5111	4.09873	1
1	1	9	2.5	6	4	1.44902	3.5111	1.59952	1
1	1	9	2.5	6	6	5.89411	6.20677	0	1
1	1	9	2.5	6	8	0	0	0	0
1	2	3	1	2	2	1.29045	2.85795	0.10222	1
1	2	3	1	2	4	0	0	0	0
1	2	3	1	2	6	0	0	0	0
1	2	3	1	2	8	0	0	0	0
1	2	3	1	4	2	9.12617	10.3396	1.00372	1
1	2	3	1	4	4	1.29045	2.85795	0.10222	1
1	2	3	1	4	6	3.60305	4.35618	0	1
1	2	3	1	4	8	-4.13709	-2.66602	0	1
1	2	3	1	6	2	10.4034	11.4472	1.50453	1
1	2	3	1	6	4	10.9926	11.6776	0.80339	1
1	2	3	1	6	6	1.29045	2.85795	0.10222	1
1	2	3	1	6	8	1.29045	2.85795	0.10222	1
1	2	3	1.5	2	2	10.9926	11.6776	0.80339	1
1	2	3	1.5	2	4	1.29045	2.85795	0.10222	1
1	2	3	1.5	2	6	2.23611	3.47368	0	1
1	2	3	1.5	2	8	0	0	0	0
1	2	3	1.5	4	2	10.4034	11.4472	1.00372	1
1	2	3	1.5	4	4	10.9926	11.6776	0.80339	1
1	2	3	1.5	4	6	5.01573	6.46619	0.30256	1
1	2	3	1.5	4	8	2.82632	4.1833	0.2024	1
1	2	3	1.5	6	2	11.4587	12.4564	1.80306	1
1	2	3	1.5	6	4	9.12617	10.3396	1.10183	1
1	2	3	1.5	6	6	10.9926	11.6776	0.9015	1
1	2	3	1.5	6	8	5.01573	6.46619	0.50084	1
1	2	3	2	2	2	10.4034	11.4472	1.00372	1
1	2	3	2	2	4	6.58253	7.70309	0.20033	1
1	2	3	2	2	6	5.01573	6.46619	0	1
1	2	3	2	2	8	2.23611	3.47368	0	1
1	2	3	2	4	2	11.1647	12.1556	1.70289	1
1	2	3	2	4	4	10.4034	11.4472	1.10183	1
1	2	3	2	4	6	9.12617	10.3396	0.50084	1
1	2	3	2	4	8	6.58253	7.70309	0.50084	1
1	2	3	2	6	2	11.4587	12.4564	2.20372	1
1	2	3	2	6	4	10.4034	11.4472	1.50249	1
1	2	3	2	6	6	10.4034	11.4472	1.20202	1
1	2	3	2	6	8	9.12617	10.3396	1.20202	1
1	2	3	2.5	2	2	10.4034	11.4472	1.10183	1
1	2	3	2.5	2	4	9.12617	10.3396	0.40066	1
1	2	3	2.5	2	6	10.9926	11.6776	0.09811	1
1	2	3	2.5	2	8	10.9926	11.6776	0.09811	1
1	2	3	2.5	4	2	11.4587	12.4564	2.20372	1
1	2	3	2.5	4	4	10.4034	11.4472	1.20202	1
1	2	3	2.5	4	6	10.4034	11.4472	0.60103	1
1	2	3	2.5	4	8	9.12617	10.3396	0.60103	1
1	2	3	2.5	6	2	11.4587	12.4564	2.20372	1
1	2	3	2.5	6	4	11.4587	12.4564	1.50249	1
1	2	3	2.5	6	6	10.4034	11.4472	1.50249	1
1	2	3	2.5	6	8	10.4034	11.4472	1.50249	1
1	2	4	1	2	2	6.63067	7.6588	0.2003	1
1	2	4	1	2	4	0	0	0	0
1	2	4	1	2	6	0	0	0	0
1	2	4	1	2	8	0	0	0	0
1	2	4	1	4	2	10.0583	11.0593	1.00166	1
1	2	4	1	4	4	6.63067	7.6588	0.2003	1
1	2	4	1	4	6	3.31519	4.04263	0.2003	1
1	2	4	1	4	8	2.50785	3.31403	0	1
1	2	4	1	6	2	11.6885	12.5624	1.50254	1
1	2	4	1	6	4	6.56597	7.86886	1.00166	1
1	2	4	1	6	6	6.63067	7.6588	0.9012	1
1	2	4	1	6	8	1.89879	3.10541	0.9012	1
1	2	4	1.5	2	2	6.56597	7.86886	1.00166	1
1	2	4	1.5	2	4	1.89879	3.10541	0.30043	1
1	2	4	1.5	2	6	2.47213	3.50421	0.30043	1
1	2	4	1.5	2	8	2.47213	3.50421	0.30043	1
1	2	4	1.5	4	2	10.0583	11.0593	1.50254	1
1	2	4	1.5	4	4	6.56597	7.86886	1.00166	1
1	2	4	1.5	4	6	6.63067	7.6588	0.40067	1
1	2	4	1.5	4	8	2.36359	3.80924	0.40062	1
1	2	4	1.5	6	2	11.6885	12.5624	2.80465	1
1	2	4	1.5	6	4	10.0583	11.0593	2.20359	1
1	2	4	1.5	6	6	6.56597	7.86886	2.10342	1
1	2	4	1.5	6	8	6.63067	7.6588	1.9031	1
1	2	4	2	2	2	10.0583	11.0593	1.50254	1
1	2	4	2	2	4	4.70351	6.29496	0.40062	1
1	2	4	2	2	6	6.63067	7.6588	0.40062	1
1	2	4	2	2	8	2.47213	3.50421	0.40062	1
1	2	4	2	4	2	11.6885	12.5624	2.40403	1
1	2	4	2	4	4	10.0583	11.0593	2.20368	1
1	2	4	2	4	6	10.0583	11.0593	1.7028	1
1	2	4	2	4	8	4.70351	6.29496	1.10181	1
1	2	4	2	6	2	11.6885	12.5624	2.80465	1
1	2	4	2	6	4	11.6885	12.5624	2.80465	1
1	2	4	2	6	6	10.0583	11.0593	2.6043	1
1	2	4	2	6	8	10.0583	11.0593	2.20359	1
1	2	4	2.5	2	2	11.6885	12.5624	2.30386	1
1	2	4	2.5	2	4	10.0583	11.0593	0.50078	1
1	2	4	2.5	2	6	9.26111	10.367	0.50078	1
1	2	4	2.5	2	8	2.56807	3.74316	0.50078	1
1	2	4	2.5	4	2	11.6885	12.5624	2.40403	1
1	2	4	2.5	4	4	11.6885	12.5624	2.40403	1
1	2	4	2.5	4	6	10.0583	11.0593	2.20368	1
1	2	4	2.5	4	8	10.0583	11.0593	1.10181	1
1	2	4	2.5	6	2	11.6885	12.5624	2.80465	1
1	2	4	2.5	6	4	11.6885	12.5624	2.80465	1
1	2	4	2.5	6	6	11.6885	12.5624	2.80465	1
1	2	4	2.5	6	8	11.6885	12.5624	2.80465	1
1	2	5	1	2	2	1.76253	3.31756	0.20033	1
1	2	5	1	2	4	0	0	0	0
1	2	5	1	2	6	0	0	0	0
1	2	5	1	2	8	0	0	0	0
1	2	5	1	4	2	9.63616	10.6612	1.60263	1
1	2	5	1	4	4	1.76253	3.31756	0.30049	1
1	2	5	1	4	6	3.49617	4.21467	0.20031	1
1	2	5	1	4	8	3.49617	4.21467	0.20031	1
1	2	5	1	6	2	10.6253	11.6231	2.80455	1
1	2	5	1	6	4	5.39428	6.83331	2.10341	1
1	2	5	1	6	6	1.76253	3.31756	1.40224	1
1	2	5	1	6	8	1.76253	3.31756	1.40224	1
1	2	5	1.5	2	2	5.39428	6.83331	1.50247	1
1	2	5	1.5	2	4	1.76253	3.31756	0.8013	1
1	2	5	1.5	2	6	1.99606	3.23994	0.50078	1
1	2	5	1.5	2	8	1.99606	3.23994	0.50078	1
1	2	5	1.5	4	2	9.82935	10.9052	2.10351	1
1	2	5	1.5	4	4	5.39428	6.83331	1.50247	1
1	2	5	1.5	4	6	5.50328	6.60485	1.30214	1
1	2	5	1.5	4	8	2.74731	4.10025	0.90148	1
1	2	5	1.5	6	2	10.6253	11.6231	2.80455	1
1	2	5	1.5	6	4	9.82935	10.9052	2.20357	1
1	2	5	1.5	6	6	5.39428	6.83331	2.10341	1
1	2	5	1.5	6	8	5.30484	6.57534	2.00325	1
1	2	5	2	2	2	9.82935	10.9052	2.10351	1
1	2	5	2	2	4	5.39428	6.83331	0.8013	1
1	2	5	2	2	6	5.30484	6.57534	0.50078	1
1	2	5	2	2	8	1.99606	3.23994	0.50078	1
1	2	5	2	4	2	10.6253	11.6231	2.40396	1
1	2	5	2	4	4	9.82935	10.9052	2.30386	1
1	2	5	2	4	6	9.63616	10.6612	1.80298	1
1	2	5	2	4	8	5.39428	6.83331	1.10183	1
1	2	5	2	6	2	10.6253	11.6231	2.80455	1
1	2	5	2	6	4	10.6253	11.6231	2.80455	1
1	2	5	2	6	6	9.82935	10.9052	2.70445	1
1	2	5	2	6	8	9.63616	10.6612	2.60428	1
1	2	5	2.5	2	2	10.6253	11.6231	2.20361	1
1	2	5	2.5	2	4	9.82935	10.9052	1.0017	1
1	2	5	2.5	2	6	9.63616	10.6612	0.50078	1
1	2	5	2.5	2	8	1.99606	3.23994	0.50078	1
1	2	5	2.5	4	2	10.6253	11.6231	2.40396	1
1	2	5	2.5	4	4	10.6253	11.6231	2.40396	1
1	2	5	2.5	4	6	10.6253	11.6231	2.40396	1
1	2	5	2.5	4	8	9.82935	10.9052	1.10183	1
1	2	5	2.5	6	2	10.6253	11.6231	2.80455	1
1	2	5	2.5	6	4	10.6253	11.6231	2.80455	1
1	2	5	2.5	6	6	10.6253	11.6231	2.80455	1
1	2	5	2.5	6	8	10.6253	11.6231	2.80455	1
1	2	6	1	2	2	5.39576	6.57202	0.8013	1
1	2	6	1	2	4	0	0	0	0
1	2	6	1	2	6	0	0	0	0
1	2	6	1	2	8	0	0	0	0
1	2	6	1	4	2	9.46572	10.5189	2.10351	1
1	2	6	1	4	4	5.39576	6.57202	0.8013	1
1	2	6	1	4	6	2.79598	3.63855	0.20031	1
1	2	6	1	4	8	2.79598	3.63855	0.20031	1
1	2	6	1	6	2	10.2195	11.2059	2.70445	1
1	2	6	1	6	4	5.4729	6.76982	2.00325	1
1	2	6	1	6	6	5.39576	6.57202	1.40224	1
1	2	6	1	6	8	2.2911	3.67126	1.40224	1
1	2	6	1.5	2	2	5.35868	6.82847	1.60264	1
1	2	6	1.5	2	4	2.2911	3.67126	0.90147	1
1	2	6	1.5	2	6	1.40572	2.80291	0.60095	1
1	2	6	1.5	2	8	1.40572	2.80291	0.60095	1
1	2	6	1.5	4	2	10.2195	11.2059	2.40399	1
1	2	6	1.5	4	4	5.35868	6.82847	1.80295	1
1	2	6	1.5	4	6	4.71054	5.98804	1.60262	1
1	2	6	1.5	4	8	2.2911	3.67126	1.10178	1
1	2	6	1.5	6	2	10.2195	11.2059	2.70445	1
1	2	6	1.5	6	4	10.2195	11.2059	2.70445	1
1	2	6	1.5	6	6	5.35868	6.82847	2.10341	1
1	2	6	1.5	6	8	5.4729	6.76982	2.00325	1
1	2	6	2	2	2	10.2195	11.2059	2.20368	1
1	2	6	2	2	4	5.4729	6.76982	0.90147	1
1	2	6	2	2	6	1.40572	2.80291	0.60095	1
1	2	6	2	2	8	1.40572	2.80291	0.60095	1
1	2	6	2	4	2	10.2195	11.2059	2.40399	1
1	2	6	2	4	4	10.2195	11.2059	2.40399	1
1	2	6	2	4	6	8.75142	9.85733	1.90311	1
1	2	6	2	4	8	5.35868	6.82847	1.80295	1
1	2	6	2	6	2	10.2195	11.2059	2.70445	1
1	2	6	2	6	4	10.2195	11.2059	2.70445	1
1	2	6	2	6	6	10.2195	11.2059	2.70445	1
1	2	6	2	6	8	8.75142	9.85733	2.50411	1
1	2	6	2.5	2	2	10.2195	11.2059	2.20368	1
1	2	6	2.5	2	4	10.2195	11.2059	1.10187	1
1	2	6	2.5	2	6	9.46572	10.5189	0.60095	1
1	2	6	2.5	2	8	1.40572	2.80291	0.60095	1
1	2	6	2.5	4	2	10.2195	11.2059	2.40399	1
1	2	6	2.5	4	4	10.2195	11.2059	2.40399	1
1	2	6	2.5	4	6	10.2195	11.2059	2.40399	1
1	2	6	2.5	4	8	10.2195	11.2059	2.40399	1
1	2	6	2.5	6	2	10.2195	11.2059	2.70445	1
1	2	6	2.5	6	4	10.2195	11.2059	2.70445	1
1	2	6	2.5	6	6	10.2195	11.2059	2.70445	1
1	2	6	2.5	6	8	10.2195	11.2059	2.70445	1
1	2	7	1	2	2	4.74363	5.9773	1.10181	1
1	2	7	1	2	4	0	0	0	0
1	2	7	1	2	6	0	0	0	0
1	2	7	1	2	8	0	0	0	0
1	2	7	1	4	2	9.75433	10.7508	2.20369	1
1	2	7	1	4	4	4.74363	5.9773	1.30216	1
1	2	7	1	4	6	1.62908	2.77446	0.50084	1
1	2	7	1	4	8	1.62908	2.77446	0.50084	1
1	2	7	1	6	2	9.75433	10.7508	2.60428	1
1	2	7	1	6	4	5.24588	6.56775	2.00325	1
1	2	7	1	6	6	4.74363	5.9773	1.70275	1
1	2	7	1	6	8	1.72352	3.12799	1.30002	1
1	2	7	1.5	2	2	5.24588	6.56775	1.50248	1
1	2	7	1.5	2	4	1.72352	3.12799	0.79925	1
1	2	7	1.5	2	6	1.27341	2.47484	0.50079	1
1	2	7	1.5	2	8	1.27341	2.47484	0.50079	1
1	2	7	1.5	4	2	9.75433	10.7508	2.30382	1
1	2	7	1.5	4	4	5.24588	6.56775	1.70279	1
1	2	7	1.5	4	6	4.85219	6.15032	1.60262	1
1	2	7	1.5	4	8	2.29348	3.69932	1.10178	1
1	2	7	1.5	6	2	9.75433	10.7508	2.60428	1
1	2	7	1.5	6	4	9.75433	10.7508	2.60428	1
1	2	7	1.5	6	6	5.24588	6.56775	2.00325	1
1	2	7	1.5	6	8	4.85219	6.15032	1.90308	1
1	2	7	2	2	2	9.75433	10.7508	2.10351	1
1	2	7	2	2	4	5.24588	6.56775	0.79925	1
1	2	7	2	2	6	1.27341	2.47484	0.50079	1
1	2	7	2	2	8	1.27341	2.47484	0.50079	1
1	2	7	2	4	2	9.75433	10.7508	2.30382	1
1	2	7	2	4	4	9.75433	10.7508	2.30382	1
1	2	7	2	4	6	8.65986	9.73476	2.10348	1
1	2	7	2	4	8	5.59637	7.00972	1.80295	1
1	2	7	2	6	2	9.75433	10.7508	2.60428	1
1	2	7	2	6	4	9.75433	10.7508	2.60428	1
1	2	7	2	6	6	9.75433	10.7508	2.60428	1
1	2	7	2	6	8	8.75063	9.84712	2.50411	1
1	2	7	2.5	2	2	9.75433	10.7508	2.10351	1
1	2	7	2.5	2	4	9.75433	10.7508	1.10186	1
1	2	7	2.5	2	6	9.75433	10.7508	0.50079	1
1	2	7	2.5	2	8	1.27341	2.47484	0.50079	1
1	2	7	2.5	4	2	9.75433	10.7508	2.30382	1
1	2	7	2.5	4	4	9.75433	10.7508	2.30382	1
1	2	7	2.5	4	6	9.75433	10.7508	2.30382	1
1	2	7	2.5	4	8	9.75433	10.7508	2.30382	1
1	2	7	2.5	6	2	9.75433	10.7508	2.60428	1
1	2	7	2.5	6	4	9.75433	10.7508	2.60428	1
1	2	7	2.5	6	6	9.75433	10.7508	2.60428	1
1	2	7	2.5	6	8	9.75433	10.7508	2.60428	1
1	2	8	1	2	2	4.29903	5.59847	1.20198	1
1	2	8	1	2	4	0	0	0	0
1	2	8	1	2	6	0	0	0	0
1	2	8	1	2	8	0	0	0	0
1	2	8	1	4	2	9.02297	10.0784	2.20365	1
1	2	8	1	4	4	4.29903	5.59847	1.40229	1
1	2	8	1	4	6	1.20073	2.44715	0.7011	1
1	2	8	1	4	8	1.20073	2.44715	0.7011	1
1	2	8	1	6	2	9.02297	10.0784	2.70443	1
1	2	8	1	6	4	5.99605	7.30983	2.30373	1
1	2	8	1	6	6	4.29903	5.59847	1.90307	1
1	2	8	1	6	8	1.74607	3.17176	1.50034	1
1	2	8	1.5	2	2	5.99605	7.30983	1.70282	1
1	2	8	1.5	2	4	2.71796	3.95259	1.00165	1
1	2	8	1.5	2	6	1.20073	2.44715	0.60097	1
1	2	8	1.5	2	8	1.20073	2.44715	0.60097	1
1	2	8	1.5	4	2	9.02297	10.0784	2.30383	1
1	2	8	1.5	4	4	5.99605	7.30983	1.90313	1
1	2	8	1.5	4	6	4.93349	6.06768	1.60261	1
1	2	8	1.5	4	8	2.71796	3.95259	1.20196	1
1	2	8	1.5	6	2	9.02297	10.0784	2.70443	1
1	2	8	1.5	6	4	9.02297	10.0784	2.70443	1
1	2	8	1.5	6	6	5.99605	7.30983	2.30373	1
1	2	8	1.5	6	8	4.66197	6.00743	2.1034	1
1	2	8	2	2	2	9.02297	10.0784	2.10352	1
1	2	8	2	2	4	5.99605	7.30983	1.70282	1
1	2	8	2	2	6	1.20073	2.44715	0.60097	1
1	2	8	2	2	8	1.20073	2.44715	0.60097	1
1	2	8	2	4	2	9.02297	10.0784	2.30383	1
1	2	8	2	4	4	9.02297	10.0784	2.30383	1
1	2	8	2	4	6	8.60525	9.68661	2.20366	1
1	2	8	2	4	8	5.99605	7.30983	1.90313	1
1	2	8	2	6	2	9.02297	10.0784	2.70443	1
1	2	8	2	6	4	9.02297	10.0784	2.70443	1
1	2	8	2	6	6	9.02297	10.0784	2.70443	1
1	2	8	2	6	8	9.02297	10.0784	2.70443	1
1	2	8	2.5	2	2	9.02297	10.0784	2.10352	1
1	2	8	2.5	2	4	9.02297	10.0784	2.10352	1
1	2	8	2.5	2	6	9.02297	10.0784	0.60097	1
1	2	8	2.5	2	8	1.20073	2.44715	0.60097	1
1	2	8	2.5	4	2	9.02297	10.0784	2.30383	1
1	2	8	2.5	4	4	9.02297	10.0784	2.30383	1
1	2	8	2.5	4	6	9.02297	10.0784	2.30383	1
1	2	8	2.5	4	8	9.02297	10.0784	2.30383	1
1	2	8	2.5	6	2	9.02297	10.0784	2.70443	1
1	2	8	2.5	6	4	9.02297	10.0784	2.70443	1
1	2	8	2.5	6	6	9.02297	10.0784	2.70443	1
1	2	8	2.5	6	8	9.02297	10.0784	2.70443	1
1	2	9	1	2	2	4.39203	5.61127	1.30216	1
1	2	9	1	2	4	0	0	0	0
1	2	9	1	2	6	0	0	0	0
1	2	9	1	2	8	0	0	0	0
1	2	9	1	4	2	8.81566	9.84529	2.20366	1
1	2	9	1	4	4	4.39203	5.61127	1.50247	1
1	2	9	1	4	6	1.02463	2.28199	0.80128	1
1	2	9	1	4	8	1.02463	2.28199	0.80128	1
1	2	9	1	6	2	8.81566	9.84529	2.60426	1
1	2	9	1	6	4	7.10012	8.30768	2.40389	1
1	2	9	1	6	6	4.39203	5.61127	1.90307	1
1	2	9	1	6	8	2.10653	3.37755	1.50034	1
1	2	9	1.5	2	2	7.10012	8.30768	1.90311	1
1	2	9	1.5	2	4	3.44394	4.57553	1.10183	1
1	2	9	1.5	2	6	1.47481	2.61225	0.40066	1
1	2	9	1.5	2	8	1.47481	2.61225	0.40066	1
1	2	9	1.5	4	2	8.81566	9.84529	2.20366	1
1	2	9	1.5	4	4	7.10012	8.30768	2.00329	1
1	2	9	1.5	4	6	4.67224	5.90891	1.60261	1
1	2	9	1.5	4	8	3.44394	4.57553	1.30214	1
1	2	9	1.5	6	2	8.81566	9.84529	2.60426	1
1	2	9	1.5	6	4	8.81566	9.84529	2.60426	1
1	2	9	1.5	6	6	7.10012	8.30768	2.40389	1
1	2	9	1.5	6	8	4.77042	6.07296	2.1034	1
1	2	9	2	2	2	8.81566	9.84529	2.10348	1
1	2	9	2	2	4	7.10012	8.30768	1.80298	1
1	2	9	2	2	6	1.47481	2.61225	0.40066	1
1	2	9	2	2	8	1.47481	2.61225	0.40066	1
1	2	9	2	4	2	8.81566	9.84529	2.20366	1
1	2	9	2	4	4	8.81566	9.84529	2.20366	1
1	2	9	2	4	6	8.81566	9.84529	2.20366	1
1	2	9	2	4	8	7.10012	8.30768	2.00329	1
1	2	9	2	6	2	8.81566	9.84529	2.60426	1
1	2	9	2	6	4	8.81566	9.84529	2.60426	1
1	2	9	2	6	6	8.81566	9.84529	2.60426	1
1	2	9	2	6	8	8.81566	9.84529	2.60426	1
1	2	9	2.5	2	2	8.81566	9.84529	2.10348	1
1	2	9	2.5	2	4	8.81566	9.84529	2.00335	1
1	2	9	2.5	2	6	8.81566	9.84529	0.40066	1
1	2	9	2.5	2	8	1.47481	2.61225	0.40066	1
1	2	9	2.5	4	2	8.81566	9.84529	2.20366	1
1	2	9	2.5	4	4	8.81566	9.84529	2.20366	1
1	2	9	2.5	4	6	8.81566	9.84529	2.20366	1
1	2	9	2.5	4	8	8.81566	9.84529	2.20366	1
1	2	9	2.5	6	2	8.81566	9.84529	2.60426	1
1	2	9	2.5	6	4	8.81566	9.84529	2.60426	1
1	2	9	2.5	6	6	8.81566	9.84529	2.60426	1
1	2	9	2.5	6	8	8.81566	9.84529	2.60426	1
1	3	3	1	2	2	-1.87297	-0.183078	1.90085	1
1	3	3	1	2	4	-2.26847	-0.898837	0.30013	1
1	3	3	1	2	6	0	0	0	0
1	3	3	1	2	8	0	0	0	0
1	3	3	1	4	2	2.71602	4.1831	3.60162	1
1	3	3	1	4	4	-1.87297	-0.183078	1.90085	1
1	3	3	1	4	6	-2.91086	-1.028	1.00043	1
1	3	3	1	4	8	-2.26847	-0.898837	0.30013	1
1	3	3	1	6	2	2.71602	4.1831	4.8021	1
1	3	3	1	6	4	2.71602	4.1831	3.20146	1
1	3	3	1	6	6	-1.87297	-0.183078	1.90085	1
1	3	3	1	6	8	-2.91086	-1.028	1.00043	1
1	3	3	1.5	2	2	2.71602	4.1831	2.50114	1
1	3	3	1.5	2	4	-2.91086	-1.028	0.30013	1
1	3	3	1.5	2	6	-2.26847	-0.898837	0	1
1	3	3	1.5	2	8	-2.26847	-0.898837	0	1
1	3	3	1.5	4	2	2.71602	4.1831	3.60162	1
1	3	3	1.5	4	4	2.71602	4.1831	2.50114	1
1	3	3	1.5	4	6	2.71602	4.1831	1.00043	1
1	3	3	1.5	4	8	-2.71871	-0.690666	0.30013	1
1	3	3	1.5	6	2	2.71602	4.1831	4.8021	1
1	3	3	1.5	6	4	2.71602	4.1831	3.20146	1
1	3	3	1.5	6	6	2.71602	4.1831	2.50114	1
1	3	3	1.5	6	8	2.71602	4.1831	1.1005	1
1	3	3	2	2	2	2.71602	4.1831	2.50114	1
1	3	3	2	2	4	2.71602	4.1831	0.40018	1
1	3	3	2	2	6	2.71602	4.1831	0	1
1	3	3	2	2	8	2.71602	4.1831	0	1
1	3	3	2	4	2	2.71602	4.1831	3.60162	1
1	3	3	2	4	4	2.71602	4.1831	2.50114	1
1	3	3	2	4	6	2.71602	4.1831	1.00043	1
1	3	3	2	4	8	2.71602	4.1831	0.50025	1
1	3	3	2	6	2	2.71602	4.1831	4.8021	1
1	3	3	2	6	4	2.71602	4.1831	3.20146	1
1	3	3	2	6	6	2.71602	4.1831	2.50114	1
1	3	3	2	6	8	2.71602	4.1831	1.1005	1
1	3	3	2.5	2	2	2.71602	4.1831	2.50114	1
1	3	3	2.5	2	4	2.71602	4.1831	0.40018	1
1	3	3	2.5	2	6	2.71602	4.1831	0	1
1	3	3	2.5	2	8	2.71602	4.1831	0	1
1	3	3	2.5	4	2	2.71602	4.1831	3.60162	1
1	3	3	2.5	4	4	2.71602	4.1831	2.50114	1
1	3	3	2.5	4	6	2.71602	4.1831	1.00043	1
1	3	3	2.5	4	8	2.71602	4.1831	0.50025	1
1	3	3	2.5	6	2	2.71602	4.1831	4.8021	1
1	3	3	2.5	6	4	2.71602	4.1831	3.20146	1
1	3	3	2.5	6	6	2.71602	4.1831	2.50114	1
1	3	3	2.5	6	8	2.71602	4.1831	1.1005	1
1	3	4	1	2	2	-2.92045	-0.767809	2.0009	1
1	3	4	1	2	4	-2.72878	-1.07067	0.40019	1
1	3	4	1	2	6	0	0	0	0
1	3	4	1	2	8	0	0	0	0
1	3	4	1	4	2	-1.15427	1.67292	3.50158	1
1	3	4	1	4	4	-2.92045	-0.767809	2.0009	1
1	3	4	1	4	6	-2.72878	-1.07067	1.40064	1
1	3	4	1	4	8	-2.72878	-1.07067	0.40019	1
1	3	4	1	6	2	-1.15427	1.67292	4.80211	1
1	3	4	1	6	4	-1.15427	1.67292	3.10142	1
1	3	4	1	6	6	-2.92045	-0.767809	2.0009	1
1	3	4	1	6	8	-2.41546	-0.728259	1.50067	1
1	3	4	1.5	2	2	-1.15427	1.67292	2.50115	1
1	3	4	1.5	2	4	-2.72878	-1.07067	0.8004	1
1	3	4	1.5	2	6	-1.03062	-0.596361	0	1
1	3	4	1.5	2	8	0	0	0	0
1	3	4	1.5	4	2	-1.15427	1.67292	3.50158	1
1	3	4	1.5	4	4	-1.15427	1.67292	2.50115	1
1	3	4	1.5	4	6	-4.16469	-1.203	1.50067	1
1	3	4	1.5	4	8	-3.47034	-0.878079	0.8004	1
1	3	4	1.5	6	2	-1.15427	1.67292	4.80211	1
1	3	4	1.5	6	4	-1.15427	1.67292	3.10142	1
1	3	4	1.5	6	6	-1.15427	1.67292	2.50115	1
1	3	4	1.5	6	8	-1.15427	1.67292	2.10096	1
1	3	4	2	2	2	-1.15427	1.67292	2.50115	1
1	3	4	2	2	4	-1.15427	1.67292	0.8004	1
1	3	4	2	2	6	-1.15427	1.67292	0	1
1	3	4	2	2	8	-1.15427	1.67292	0	1
1	3	4	2	4	2	-1.15427	1.67292	3.50158	1
1	3	4	2	4	4	-1.15427	1.67292	2.50115	1
1	3	4	2	4	6	-1.15427	1.67292	1.50067	1
1	3	4	2	4	8	-1.15427	1.67292	0.8004	1
1	3	4	2	6	2	-1.15427	1.67292	4.80211	1
1	3	4	2	6	4	-1.15427	1.67292	3.10142	1
1	3	4	2	6	6	-1.15427	1.67292	2.50115	1
1	3	4	2	6	8	-1.15427	1.67292	2.10096	1
1	3	4	2.5	2	2	-1.15427	1.67292	2.50115	1
1	3	4	2.5	2	4	-1.15427	1.67292	0.8004	1
1	3	4	2.5	2	6	-1.15427	1.67292	0	1
1	3	4	2.5	2	8	-1.15427	1.67292	0	1
1	3	4	2.5	4	2	-1.15427	1.67292	3.50158	1
1	3	4	2.5	4	4	-1.15427	1.67292	2.50115	1
1	3	4	2.5	4	6	-1.15427	1.67292	1.50067	1
1	3	4	2.5	4	8	-1.15427	1.67292	0.8004	1
1	3	4	2.5	6	2	-1.15427	1.67292	4.80211	1
1	3	4	2.5	6	4	-1.15427	1.67292	3.10142	1
1	3	4	2.5	6	6	-1.15427	1.67292	2.50115	1
1	3	4	2.5	6	8	-1.15427	1.67292	2.10096	1
1	3	5	1	2	2	-3.21857	-0.956226	1.90086	1
1	3	5	1	2	4	-1.8381	-0.404619	0.90036	1
1	3	5	1	2	6	0	0	0	0
1	3	5	1	2	8	0	0	0	0
1	3	5	1	4	2	-2.38971	-0.839628	3.40148	1
1	3	5	1	4	4	-3.21857	-0.956226	1.90086	1
1	3	5	1	4	6	-2.60114	-0.807392	1.40064	1
1	3	5	1	4	8	-1.8381	-0.404619	0.90036	1
1	3	5	1	6	2	-2.38971	-0.839628	5.40228	1
1	3	5	1	6	4	-2.38971	-0.839628	3.00132	1
1	3	5	1	6	6	-3.21857	-0.956226	1.90086	1
1	3	5	1	6	8	-3.21857	-0.956226	1.60073	1
1	3	5	1.5	2	2	-2.38971	-0.839628	2.40105	1
1	3	5	1.5	2	4	-2.60114	-0.807392	1.00046	1
1	3	5	1.5	2	6	0	0	0	0
1	3	5	1.5	2	8	0	0	0	0
1	3	5	1.5	4	2	-2.38971	-0.839628	3.40148	1
1	3	5	1.5	4	4	-2.38971	-0.839628	2.40105	1
1	3	5	1.5	4	6	-2.38971	-0.839628	2.00086	1
1	3	5	1.5	4	8	-3.79748	-1.17087	1.00046	1
1	3	5	1.5	6	2	-2.38971	-0.839628	5.40228	1
1	3	5	1.5	6	4	-2.38971	-0.839628	3.00132	1
1	3	5	1.5	6	6	-2.38971	-0.839628	2.40105	1
1	3	5	1.5	6	8	-2.38971	-0.839628	2.10092	1
1	3	5	2	2	2	-2.38971	-0.839628	2.40105	1
1	3	5	2	2	4	-2.38971	-0.839628	1.00046	1
1	3	5	2	2	6	-2.38971	-0.839628	0	1
1	3	5	2	2	8	0	0	0	0
1	3	5	2	4	2	-2.38971	-0.839628	3.40148	1
1	3	5	2	4	4	-2.38971	-0.839628	2.40105	1
1	3	5	2	4	6	-2.38971	-0.839628	2.00086	1
1	3	5	2	4	8	-2.38971	-0.839628	1.00046	1
1	3	5	2	6	2	-2.38971	-0.839628	5.40228	1
1	3	5	2	6	4	-2.38971	-0.839628	3.00132	1
1	3	5	2	6	6	-2.38971	-0.839628	2.40105	1
1	3	5	2	6	8	-2.38971	-0.839628	2.10092	1
1	3	5	2.5	2	2	-2.38971	-0.839628	2.40105	1
1	3	5	2.5	2	4	-2.38971	-0.839628	1.00046	1
1	3	5	2.5	2	6	-2.38971	-0.839628	0	1
1	3	5	2.5	2	8	0	0	0	0
1	3	5	2.5	4	2	-2.38971	-0.839628	3.40148	1
1	3	5	2.5	4	4	-2.38971	-0.839628	2.40105	1
1	3	5	2.5	4	6	-2.38971	-0.839628	2.00086	1
1	3	5	2.5	4	8	-2.38971	-0.839628	1.00046	1
1	3	5	2.5	6	2	-2.38971	-0.839628	5.40228	1
1	3	5	2.5	6	4	-2.38971	-0.839628	3.00132	1
1	3	5	2.5	6	6	-2.38971	-0.839628	2.40105	1
1	3	5	2.5	6	8	-2.38971	-0.839628	2.10092	1
1	3	6	1	2	2	-4.59346	-1.82153	2.10094	1
1	3	6	1	2	4	-1.37441	-0.134127	0.80034	1
1	3	6	1	2	6	0	0	0	0
1	3	6	1	2	8	0	0	0	0
1	3	6	1	4	2	-3.1635	-0.750261	3.30147	1
1	3	6	1	4	4	-4.59346	-1.82153	2.10094	1
1	3	6	1	4	6	-3.14919	-1.24819	1.40064	1
1	3	6	1	4	8	-1.37441	-0.134127	0.80034	1
1	3	6	1	6	2	-3.1635	-0.750261	5.30227	1
1	3	6	1	6	4	-3.1635	-0.750261	2.90131	1
1	3	6	1	6	6	-4.59346	-1.82153	2.10094	1
1	3	6	1	6	8	-3.70873	-1.31129	1.60073	1
1	3	6	1.5	2	2	-3.1635	-0.750261	2.30104	1
1	3	6	1.5	2	4	-4.59346	-1.82153	1.00046	1
1	3	6	1.5	2	6	0	0	0	0
1	3	6	1.5	2	8	0	0	0	0
1	3	6	1.5	4	2	-3.1635	-0.750261	3.30147	1
1	3	6	1.5	4	4	-3.1635	-0.750261	2.30104	1
1	3	6	1.5	4	6	-3.1635	-0.750261	1.90085	1
1	3	6	1.5	4	8	-4.59346	-1.82153	1.00046	1
1	3	6	1.5	6	2	-3.1635	-0.750261	5.30227	1
1	3	6	1.5	6	4	-3.1635	-0.750261	2.90131	1
1	3	6	1.5	6	6	-3.1635	-0.750261	2.30104	1
1	3	6	1.5	6	8	-3.1635	-0.750261	2.00091	1
1	3	6	2	2	2	-3.1635	-0.750261	2.30104	1
1	3	6	2	2	4	-3.1635	-0.750261	1.00046	1
1	3	6	2	2	6	0	0	0	0
1	3	6	2	2	8	0	0	0	0
1	3	6	2	4	2	-3.1635	-0.750261	3.30147	1
1	3	6	2	4	4	-3.1635	-0.750261	2.30104	1
1	3	6	2	4	6	-3.1635	-0.750261	1.90085	1
1	3	6	2	4	8	-3.1635	-0.750261	1.00046	1
1	3	6	2	6	2	-3.1635	-0.750261	5.30227	1
1	3	6	2	6	4	-3.1635	-0.750261	2.90131	1
1	3	6	2	6	6	-3.1635	-0.750261	2.30104	1
1	3	6	2	6	8	-3.1635	-0.750261	2.00091	1
1	3	6	2.5	2	2	-3.1635	-0.750261	2.30104	1
1	3	6	2.5	2	4	-3.1635	-0.750261	1.00046	1
1	3	6	2.5	2	6	0	0	0	0
1	3	6	2.5	2	8	0	0	0	0
1	3	6	2.5	4	2	-3.1635	-0.750261	3.30147	1
1	3	6	2.5	4	4	-3.1635	-0.750261	2.30104	1
1	3	6	2.5	4	6	-3.1635	-0.750261	1.90085	1
1	3	6	2.5	4	8	-3.1635	-0.750261	1.00046	1
1	3	6	2.5	6	2	-3.1635	-0.750261	5.30227	1
1	3	6	2.5	6	4	-3.1635	-0.750261	2.90131	1
1	3	6	2.5	6	6	-3.1635	-0.750261	2.30104	1
1	3	6	2.5	6	8	-3.1635	-0.750261	2.00091	1
1	3	7	1	2	2	-4.69903	-1.87493	2.10094	1
1	3	7	1	2	4	-1.62504	-0.340164	0.90042	1
1	3	7	1	2	6	0	0	0	0
1	3	7	1	2	8	0	0	0	0
1	3	7	1	4	2	-4.05015	-1.3976	3.30147	1
1	3	7	1	4	4	-4.69903	-1.87493	2.10094	1
1	3	7	1	4	6	-3.69092	-1.62626	1.5007	1
1	3	7	1	4	8	-1.62504	-0.340164	0.90042	1
1	3	7	1	6	2	-4.05015	-1.3976	5.20224	1
1	3	7	1	6	4	-4.05015	-1.3976	2.90136	1
1	3	7	1	6	6	-4.69903	-1.87493	2.10094	1
1	3	7	1	6	8	-4.05345	-1.57607	1.60073	1
1	3	7	1.5	2	2	-4.05015	-1.3976	2.20101	1
1	3	7	1.5	2	4	-4.05015	-1.3976	1.10054	1
1	3	7	1.5	2	6	0	0	0	0
1	3	7	1.5	2	8	0	0	0	0
1	3	7	1.5	4	2	-4.05015	-1.3976	3.30147	1
1	3	7	1.5	4	4	-4.05015	-1.3976	2.20101	1
1	3	7	1.5	4	6	-4.05015	-1.3976	1.90088	1
1	3	7	1.5	4	8	-4.05015	-1.3976	1.10054	1
1	3	7	1.5	6	2	-4.05015	-1.3976	5.20224	1
1	3	7	1.5	6	4	-4.05015	-1.3976	2.90136	1
1	3	7	1.5	6	6	-4.05015	-1.3976	2.20101	1
1	3	7	1.5	6	8	-4.05015	-1.3976	1.90088	1
1	3	7	2	2	2	-4.05015	-1.3976	2.20101	1
1	3	7	2	2	4	-4.05015	-1.3976	1.10054	1
1	3	7	2	2	6	-4.05015	-1.3976	0	1
1	3	7	2	2	8	0	0	0	0
1	3	7	2	4	2	-4.05015	-1.3976	3.30147	1
1	3	7	2	4	4	-4.05015	-1.3976	2.20101	1
1	3	7	2	4	6	-4.05015	-1.3976	1.90088	1
1	3	7	2	4	8	-4.05015	-1.3976	1.10054	1
1	3	7	2	6	2	-4.05015	-1.3976	5.20224	1
1	3	7	2	6	4	-4.05015	-1.3976	2.90136	1
1	3	7	2	6	6	-4.05015	-1.3976	2.20101	1
1	3	7	2	6	8	-4.05015	-1.3976	1.90088	1
1	3	7	2.5	2	2	-4.05015	-1.3976	2.20101	1
1	3	7	2.5	2	4	-4.05015	-1.3976	1.10054	1
1	3	7	2.5	2	6	-4.05015	-1.3976	0	1
1	3	7	2.5	2	8	0	0	0	0
1	3	7	2.5	4	2	-4.05015	-1.3976	3.30147	1
1	3	7	2.5	4	4	-4.05015	-1.3976	2.20101	1
1	3	7	2.5	4	6	-4.05015	-1.3976	1.90088	1
1	3	7	2.5	4	8	-4.05015	-1.3976	1.10054	1
1	3	7	2.5	6	2	-4.05015	-1.3976	5.20224	1
1	3	7	2.5	6	4	-4.05015	-1.3976	2.90136	1
1	3	7	2.5	6	6	-4.05015	-1.3976	2.20101	1
1	3	7	2.5	6	8	-4.05015	-1.3976	1.90088	1
1	3	8	1	2	2	-4.88136	-2.15458	2.0009	1
1	3	8	1	2	4	-2.29492	-0.67766	0.90042	1
1	3	8	1	2	6	0	0	0	0
1	3	8	1	2	8	0	0	0	0
1	3	8	1	4	2	-4.12438	-1.47578	3.2014	1
1	3	8	1	4	4	-4.88136	-2.15458	2.0009	1
1	3	8	1	4	6	-4.05186	-1.84403	1.5007	1
1	3	8	1	4	8	-2.29492	-0.67766	0.90042	1
1	3	8	1	6	2	-4.12438	-1.47578	5.10217	1
1	3	8	1	6	4	-4.12438	-1.47578	2.80129	1
1	3	8	1	6	6	-4.88136	-2.15458	2.0009	1
1	3	8	1	6	8	-4.68324	-2.04887	1.70077	1
1	3	8	1.5	2	2	-4.12438	-1.47578	2.10094	1
1	3	8	1.5	2	4	-4.12438	-1.47578	1.10054	1
1	3	8	1.5	2	6	0	0	0	0
1	3	8	1.5	2	8	0	0	0	0
1	3	8	1.5	4	2	-4.12438	-1.47578	3.2014	1
1	3	8	1.5	4	4	-4.12438	-1.47578	2.10094	1
1	3	8	1.5	4	6	-4.12438	-1.47578	1.80081	1
1	3	8	1.5	4	8	-4.12438	-1.47578	1.10054	1
1	3	8	1.5	6	2	-4.12438	-1.47578	5.10217	1
1	3	8	1.5	6	4	-4.12438	-1.47578	2.80129	1
1	3	8	1.5	6	6	-4.12438	-1.47578	2.10094	1
1	3	8	1.5	6	8	-4.12438	-1.47578	1.90085	1
1	3	8	2	2	2	-4.12438	-1.47578	2.10094	1
1	3	8	2	2	4	-4.12438	-1.47578	1.10054	1
1	3	8	2	2	6	0	0	0	0
1	3	8	2	2	8	0	0	0	0
1	3	8	2	4	2	-4.12438	-1.47578	3.2014	1
1	3	8	2	4	4	-4.12438	-1.47578	2.10094	1
1	3	8	2	4	6	-4.12438	-1.47578	1.80081	1
1	3	8	2	4	8	-4.12438	-1.47578	1.10054	1
1	3	8	2	6	2	-4.12438	-1.47578	5.10217	1
1	3	8	2	6	4	-4.12438	-1.47578	2.80129	1
1	3	8	2	6	6	-4.12438	-1.47578	2.10094	1
1	3	8	2	6	8	-4.12438	-1.47578	1.90085	1
1	3	8	2.5	2	2	-4.12438	-1.47578	2.10094	1
1	3	8	2.5	2	4	-4.12438	-1.47578	1.10054	1
1	3	8	2.5	2	6	0	0	0	0
1	3	8	2.5	2	8	0	0	0	0
1	3	8	2.5	4	2	-4.12438	-1.47578	3.2014	1
1	3	8	2.5	4	4	-4.12438	-1.47578	2.10094	1
1	3	8	2.5	4	6	-4.12438	-1.47578	1.80081	1
1	3	8	2.5	4	8	-4.12438	-1.47578	1.10054	1
1	3	8	2.5	6	2	-4.12438	-1.47578	5.10217	1
1	3	8	2.5	6	4	-4.12438	-1.47578	2.80129	1
1	3	8	2.5	6	6	-4.12438	-1.47578	2.10094	1
1	3	8	2.5	6	8	-4.12438	-1.47578	1.90085	1
1	3	9	1	2	2	-4.47262	-1.90147	2.10095	1
1	3	9	1	2	4	-2.77269	-1.07589	0.80034	1
1	3	9	1	2	6	0	0	0	0
1	3	9	1	2	8	0	0	0	0
1	3	9	1	4	2	-4.47262	-1.90147	3.10136	1
1	3	9	1	4	4	-4.47262	-1.90147	2.10095	1
1	3	9	1	4	6	-4.63395	-2.23857	1.5007	1
1	3	9	1	4	8	-2.77269	-1.07589	0.80034	1
1	3	9	1	6	2	-4.47262	-1.90147	5.00213	1
1	3	9	1	6	4	-4.47262	-1.90147	2.70125	1
1	3	9	1	6	6	-4.47262	-1.90147	2.10095	1
1	3	9	1	6	8	-4.98628	-2.31001	1.70077	1
1	3	9	1.5	2	2	-4.47262	-1.90147	2.10095	1
1	3	9	1.5	2	4	-4.47262	-1.90147	1.00046	1
1	3	9	1.5	2	6	0	0	0	0
1	3	9	1.5	2	8	0	0	0	0
1	3	9	1.5	4	2	-4.47262	-1.90147	3.10136	1
1	3	9	1.5	4	4	-4.47262	-1.90147	2.10095	1
1	3	9	1.5	4	6	-4.47262	-1.90147	1.70077	1
1	3	9	1.5	4	8	-4.47262	-1.90147	1.20053	1
1	3	9	1.5	6	2	-4.47262	-1.90147	5.00213	1
1	3	9	1.5	6	4	-4.47262	-1.90147	2.70125	1
1	3	9	1.5	6	6	-4.47262	-1.90147	2.10095	1
1	3	9	1.5	6	8	-4.47262	-1.90147	1.80081	1
1	3	9	2	2	2	-4.47262	-1.90147	2.10095	1
1	3	9	2	2	4	-4.47262	-1.90147	1.00046	1
1	3	9	2	2	6	0	0	0	0
1	3	9	2	2	8	0	0	0	0
1	3	9	2	4	2	-4.47262	-1.90147	3.10136	1
1	3	9	2	4	4	-4.47262	-1.90147	2.10095	1
1	3	9	2	4	6	-4.47262	-1.90147	1.70077	1
1	3	9	2	4	8	-4.47262	-1.90147	1.20053	1
1	3	9	2	6	2	-4.47262	-1.90147	5.00213	1
1	3	9	2	6	4	-4.47262	-1.90147	2.70125	1
1	3	9	2	6	6	-4.47262	-1.90147	2.10095	1
1	3	9	2	6	8	-4.47262	-1.90147	1.80081	1
1	3	9	2.5	2	2	-4.47262	-1.90147	2.10095	1
1	3	9	2.5	2	4	-4.47262	-1.90147	1.00046	1
1	3	9	2.5	2	6	0	0	0	0
1	3	9	2.5	2	8	0	0	0	0
1	3	9	2.5	4	2	-4.47262	-1.90147	3.10136	1
1	3	9	2.5	4	4	-4.47262	-1.90147	2.10095	1
1	3	9	2.5	4	6	-4.47262	-1.90147	1.70077	1
1	3	9	2.5	4	8	-4.47262	-1.90147	1.20053	1
1	3	9	2.5	6	2	-4.47262	-1.90147	5.00213	1
1	3	9	2.5	6	4	-4.47262	-1.90147	2.70125	1
1	3	9	2.5	6	6	-4.47262	-1.90147	2.10095	1
1	3	9	2.5	6	8	-4.47262	-1.90147	1.80081	1

## Sheet: Flight 2
FLIGHT Nr.	Encounter	Window size W	t_p [s]	D_LIM [m]	Vsc scale k_V	Distance with firm braking [m]	Distance with emergency braking [m]	DNT (maxT) [s]	Safe (0), Danger (1)
2	1	3	1	2	2	9.40299	9.50024	0.10004	1
2	1	3	1	2	4	0	0	0	0
2	1	3	1	2	6	0	0	0	0
2	1	3	1	2	8	0	0	0	0
2	1	3	1	4	2	14.0937	14.273	0.69991	1
2	1	3	1	4	4	9.40299	9.50024	0.10004	1
2	1	3	1	4	6	0	0	0	0
2	1	3	1	4	8	0	0	0	0
2	1	3	1	6	2	14.0937	14.273	0.79993	1
2	1	3	1	6	4	3.56084	5.04376	0.19997	1
2	1	3	1	6	6	9.40299	9.50024	0.10004	1
2	1	3	1	6	8	-10.1435	9.2156	0	1
2	1	3	1.5	2	2	9.40299	9.50024	0.10004	1
2	1	3	1.5	2	4	-10.1435	9.2156	0	1
2	1	3	1.5	2	6	0	0	0	0
2	1	3	1.5	2	8	0	0	0	0
2	1	3	1.5	4	2	14.0937	14.273	0.69991	1
2	1	3	1.5	4	4	9.40299	9.50024	0.10004	1
2	1	3	1.5	4	6	9.40299	9.50024	0.10004	1
2	1	3	1.5	4	8	-10.1435	9.2156	0	1
2	1	3	1.5	6	2	14.0937	14.273	0.99988	1
2	1	3	1.5	6	4	14.0937	14.273	0.3	1
2	1	3	1.5	6	6	9.40299	9.50024	0.10004	1
2	1	3	1.5	6	8	9.40299	9.50024	0.10004	1
2	1	3	2	2	2	7.84348	8.83121	0.20001	1
2	1	3	2	2	4	9.40299	9.50024	0.10004	1
2	1	3	2	2	6	-10.1435	9.2156	0	1
2	1	3	2	2	8	0	0	0	0
2	1	3	2	4	2	14.0937	14.273	0.69991	1
2	1	3	2	4	4	7.84348	8.83121	0.20001	1
2	1	3	2	4	6	9.40299	9.50024	0.10004	1
2	1	3	2	4	8	9.40299	9.50024	0.10004	1
2	1	3	2	6	2	14.0937	14.273	1.89979	1
2	1	3	2	6	4	14.0937	14.273	0.39999	1
2	1	3	2	6	6	7.84348	8.83121	0.20001	1
2	1	3	2	6	8	3.56084	5.04376	0.19997	1
2	1	3	2.5	2	2	14.0937	14.273	0.20001	1
2	1	3	2.5	2	4	3.56084	5.04376	0.19997	1
2	1	3	2.5	2	6	9.40299	9.50024	0.09999	1
2	1	3	2.5	2	8	9.40299	9.50024	0.09999	1
2	1	3	2.5	4	2	14.0937	14.273	0.99988	1
2	1	3	2.5	4	4	14.0937	14.273	0.20001	1
2	1	3	2.5	4	6	7.84348	8.83121	0.19997	1
2	1	3	2.5	4	8	3.56084	5.04376	0.19997	1
2	1	3	2.5	6	2	14.0937	14.273	1.89979	1
2	1	3	2.5	6	4	14.0937	14.273	0.39999	1
2	1	3	2.5	6	6	14.0937	14.273	0.20001	1
2	1	3	2.5	6	8	7.84348	8.83121	0.19997	1
2	1	4	1	2	2	7.49729	7.71968	0.20001	1
2	1	4	1	2	4	0	0	0	0
2	1	4	1	2	6	0	0	0	0
2	1	4	1	2	8	0	0	0	0
2	1	4	1	4	2	10.1423	11.1656	0.59991	1
2	1	4	1	4	4	7.49729	7.71968	0.20001	1
2	1	4	1	4	6	0	0	0	0
2	1	4	1	4	8	0	0	0	0
2	1	4	1	6	2	10.1423	11.1656	2.39974	1
2	1	4	1	6	4	8.42677	8.82071	0.20001	1
2	1	4	1	6	6	7.49729	7.71968	0.20001	1
2	1	4	1	6	8	0	0	0	0
2	1	4	1.5	2	2	8.42677	8.82071	0.20001	1
2	1	4	1.5	2	4	0	0	0	0
2	1	4	1.5	2	6	0	0	0	0
2	1	4	1.5	2	8	0	0	0	0
2	1	4	1.5	4	2	10.1423	11.1656	1.69981	1
2	1	4	1.5	4	4	8.42677	8.82071	0.20001	1
2	1	4	1.5	4	6	7.49729	7.71968	0.20001	1
2	1	4	1.5	4	8	0	0	0	0
2	1	4	1.5	6	2	10.1423	11.1656	2.39974	1
2	1	4	1.5	6	4	7.91226	8.95953	0.39994	1
2	1	4	1.5	6	6	8.42677	8.82071	0.20001	1
2	1	4	1.5	6	8	8.42677	8.82071	0.20001	1
2	1	4	2	2	2	7.91226	8.95953	0.3	1
2	1	4	2	2	4	8.42677	8.82071	0.20001	1
2	1	4	2	2	6	7.49729	7.71968	0.10004	1
2	1	4	2	2	8	0	0	0	0
2	1	4	2	4	2	10.1423	11.1656	2.39974	1
2	1	4	2	4	4	7.91226	8.95953	0.3	1
2	1	4	2	4	6	8.42677	8.82071	0.20001	1
2	1	4	2	4	8	8.42677	8.82071	0.20001	1
2	1	4	2	6	2	10.1423	11.1656	2.39974	1
2	1	4	2	6	4	10.1423	11.1656	0.69991	1
2	1	4	2	6	6	7.91226	8.95953	0.3	1
2	1	4	2	6	8	8.42677	8.82071	0.3	1
2	1	4	2.5	2	2	10.1423	11.1656	0.39994	1
2	1	4	2.5	2	4	8.42677	8.82071	0.3	1
2	1	4	2.5	2	6	8.69491	8.89161	0.10004	1
2	1	4	2.5	2	8	7.49729	7.71968	0.10004	1
2	1	4	2.5	4	2	10.1423	11.1656	2.39974	1
2	1	4	2.5	4	4	10.1423	11.1656	0.39994	1
2	1	4	2.5	4	6	7.91226	8.95953	0.3	1
2	1	4	2.5	4	8	8.42677	8.82071	0.3	1
2	1	4	2.5	6	2	10.1423	11.1656	2.49973	1
2	1	4	2.5	6	4	10.1423	11.1656	2.29975	1
2	1	4	2.5	6	6	10.1423	11.1656	0.39994	1
2	1	4	2.5	6	8	10.1423	11.1656	0.3	1
2	1	5	1	2	2	6.42428	6.85648	0	1
2	1	5	1	2	4	0	0	0	0
2	1	5	1	2	6	0	0	0	0
2	1	5	1	2	8	0	0	0	0
2	1	5	1	4	2	6.59709	7.7729	0.89994	1
2	1	5	1	4	4	6.42428	6.85648	0	1
2	1	5	1	4	6	0	0	0	0
2	1	5	1	4	8	0	0	0	0
2	1	5	1	6	2	9.43864	10.4966	4.69948	1
2	1	5	1	6	4	6.40227	7.20825	0.3	1
2	1	5	1	6	6	6.42428	6.85648	0	1
2	1	5	1	6	8	0	0	0	0
2	1	5	1.5	2	2	6.40227	7.20825	0.19998	1
2	1	5	1.5	2	4	0	0	0	0
2	1	5	1.5	2	6	0	0	0	0
2	1	5	1.5	2	8	0	0	0	0
2	1	5	1.5	4	2	9.43864	10.4966	0.99991	1
2	1	5	1.5	4	4	6.40227	7.20825	0.19998	1
2	1	5	1.5	4	6	6.42428	6.85648	0	1
2	1	5	1.5	4	8	0	0	0	0
2	1	5	1.5	6	2	9.43864	10.4966	4.79945	1
2	1	5	1.5	6	4	6.59709	7.7729	0.79995	1
2	1	5	1.5	6	6	6.40227	7.20825	0.19998	1
2	1	5	1.5	6	8	8.19026	8.54803	0.09997	1
2	1	5	2	2	2	6.59709	7.7729	0.79995	1
2	1	5	2	2	4	8.19026	8.54803	0.19996	1
2	1	5	2	2	6	6.42428	6.85648	0.09999	1
2	1	5	2	2	8	6.42428	6.85648	0	1
2	1	5	2	4	2	9.43864	10.4966	2.29977	1
2	1	5	2	4	4	6.59709	7.7729	0.79995	1
2	1	5	2	4	6	6.40227	7.20825	0.19998	1
2	1	5	2	4	8	8.19026	8.54803	0.19996	1
2	1	5	2	6	2	9.43864	10.4966	4.89944	1
2	1	5	2	6	4	9.43864	10.4966	1.7998	1
2	1	5	2	6	6	6.59709	7.7729	0.79995	1
2	1	5	2	6	8	6.40227	7.20825	0.79995	1
2	1	5	2.5	2	2	6.208	7.61406	0.89992	1
2	1	5	2.5	2	4	8.19026	8.54803	0.49997	1
2	1	5	2.5	2	6	6.51324	6.81622	0.39993	1
2	1	5	2.5	2	8	6.51324	6.81622	0.39993	1
2	1	5	2.5	4	2	9.43864	10.4966	2.39974	1
2	1	5	2.5	4	4	6.208	7.61406	0.89992	1
2	1	5	2.5	4	6	6.59709	7.7729	0.49997	1
2	1	5	2.5	4	8	8.19026	8.54803	0.49997	1
2	1	5	2.5	6	2	9.43864	10.4966	5.09942	1
2	1	5	2.5	6	4	9.43864	10.4966	2.39974	1
2	1	5	2.5	6	6	6.208	7.61406	0.89992	1
2	1	5	2.5	6	8	6.59709	7.7729	0.79995	1
2	1	6	1	2	2	0	0	0	0
2	1	6	1	2	4	0	0	0	0
2	1	6	1	2	6	0	0	0	0
2	1	6	1	2	8	0	0	0	0
2	1	6	1	4	2	6.42089	7.59987	0.89994	1
2	1	6	1	4	4	0	0	0	0
2	1	6	1	4	6	0	0	0	0
2	1	6	1	4	8	0	0	0	0
2	1	6	1	6	2	7.70265	8.98443	4.4995	1
2	1	6	1	6	4	5.95145	6.85628	0.4	1
2	1	6	1	6	6	0	0	0	0
2	1	6	1	6	8	0	0	0	0
2	1	6	1.5	2	2	5.95145	6.85628	0.29997	1
2	1	6	1.5	2	4	0	0	0	0
2	1	6	1.5	2	6	0	0	0	0
2	1	6	1.5	2	8	0	0	0	0
2	1	6	1.5	4	2	5.57213	7.00104	3.29963	1
2	1	6	1.5	4	4	5.95145	6.85628	0.29997	1
2	1	6	1.5	4	6	5.43189	5.98072	0	1
2	1	6	1.5	4	8	0	0	0	0
2	1	6	1.5	6	2	7.70265	8.98443	4.59947	1
2	1	6	1.5	6	4	5.07417	6.20499	0.89994	1
2	1	6	1.5	6	6	5.95145	6.85628	0.29997	1
2	1	6	1.5	6	8	6.78172	7.17253	0.09999	1
2	1	6	2	2	2	5.95145	6.85628	0.79995	1
2	1	6	2	2	4	6.78172	7.17253	0.19999	1
2	1	6	2	2	6	5.43189	5.98072	0	1
2	1	6	2	2	8	5.43189	5.98072	0	1
2	1	6	2	4	2	7.70265	8.98443	3.39963	1
2	1	6	2	4	4	5.95145	6.85628	0.79995	1
2	1	6	2	4	6	6.72522	7.3773	0.29996	1
2	1	6	2	4	8	6.78172	7.17253	0.19999	1
2	1	6	2	6	2	7.70265	8.98443	4.79947	1
2	1	6	2	6	4	5.57213	7.00104	2.19977	1
2	1	6	2	6	6	5.95145	6.85628	0.79995	1
2	1	6	2	6	8	5.95145	6.85628	0.79995	1
2	1	6	2.5	2	2	5.57213	7.00104	0.79995	1
2	1	6	2.5	2	4	6.85001	7.2405	0.39993	1
2	1	6	2.5	2	6	6.78172	7.17253	0.29996	1
2	1	6	2.5	2	8	6.78172	7.17253	0.29996	1
2	1	6	2.5	4	2	7.70265	8.98443	3.6996	1
2	1	6	2.5	4	4	5.57213	7.00104	0.79995	1
2	1	6	2.5	4	6	5.95145	6.85628	0.69998	1
2	1	6	2.5	4	8	6.85001	7.2405	0.59994	1
2	1	6	2.5	6	2	7.70265	8.98443	4.79947	1
2	1	6	2.5	6	4	7.70265	8.98443	2.29977	1
2	1	6	2.5	6	6	5.57213	7.00104	0.79995	1
2	1	6	2.5	6	8	5.95145	6.85628	0.79995	1
2	1	7	1	2	2	0	0	0	0
2	1	7	1	2	4	0	0	0	0
2	1	7	1	2	6	0	0	0	0
2	1	7	1	2	8	0	0	0	0
2	1	7	1	4	2	6.42023	7.5325	1.9998	1
2	1	7	1	4	4	0	0	0	0
2	1	7	1	4	6	0	0	0	0
2	1	7	1	4	8	0	0	0	0
2	1	7	1	6	2	6.46108	7.91429	4.4995	1
2	1	7	1	6	4	5.79961	6.75163	0.69991	1
2	1	7	1	6	6	0	0	0	0
2	1	7	1	6	8	0	0	0	0
2	1	7	1.5	2	2	6.24197	6.99742	0.59994	1
2	1	7	1.5	2	4	0	0	0	0
2	1	7	1.5	2	6	0	0	0	0
2	1	7	1.5	2	8	0	0	0	0
2	1	7	1.5	4	2	5.41716	6.89273	3.29963	1
2	1	7	1.5	4	4	6.24197	6.99742	0.59994	1
2	1	7	1.5	4	6	0	0	0	0
2	1	7	1.5	4	8	0	0	0	0
2	1	7	1.5	6	2	6.46108	7.91429	4.69946	1
2	1	7	1.5	6	4	5.79961	6.75163	0.89994	1
2	1	7	1.5	6	6	6.24197	6.99742	0.59994	1
2	1	7	1.5	6	8	5.99868	6.45635	0.1	1
2	1	7	2	2	2	5.79961	6.75163	0.79995	1
2	1	7	2	2	4	6.87463	7.25022	0.29996	1
2	1	7	2	2	6	5.99868	6.45635	0.1	1
2	1	7	2	2	8	0	0	0	0
2	1	7	2	4	2	6.46108	7.91429	3.39963	1
2	1	7	2	4	4	5.79961	6.75163	0.79995	1
2	1	7	2	4	6	6.24197	6.99742	0.59994	1
2	1	7	2	4	8	6.87463	7.25022	0.49997	1
2	1	7	2	6	2	6.46108	7.91429	4.69946	1
2	1	7	2	6	4	5.41716	6.89273	2.29973	1
2	1	7	2	6	6	5.79961	6.75163	0.89994	1
2	1	7	2	6	8	6.24197	6.99742	0.7999	1
2	1	7	2.5	2	2	5.41716	6.89273	0.79995	1
2	1	7	2.5	2	4	6.87463	7.25022	0.49997	1
2	1	7	2.5	2	6	5.99868	6.45635	0.19997	1
2	1	7	2.5	2	8	5.99868	6.45635	0.19997	1
2	1	7	2.5	4	2	6.46108	7.91429	3.59959	1
2	1	7	2.5	4	4	5.41716	6.89273	0.79995	1
2	1	7	2.5	4	6	6.24197	6.99742	0.59994	1
2	1	7	2.5	4	8	6.87463	7.25022	0.49997	1
2	1	7	2.5	6	2	6.46108	7.91429	4.69946	1
2	1	7	2.5	6	4	6.46108	7.91429	2.39973	1
2	1	7	2.5	6	6	5.41716	6.89273	0.89994	1
2	1	7	2.5	6	8	5.79961	6.75163	0.89994	1
2	1	8	1	2	2	0	0	0	0
2	1	8	1	2	4	0	0	0	0
2	1	8	1	2	6	0	0	0	0
2	1	8	1	2	8	0	0	0	0
2	1	8	1	4	2	5.34354	6.53898	2.8998	1
2	1	8	1	4	4	0	0	0	0
2	1	8	1	4	6	0	0	0	0
2	1	8	1	4	8	0	0	0	0
2	1	8	1	6	2	6.50908	7.90063	4.59947	1
2	1	8	1	6	4	5.93059	6.79217	0.69991	1
2	1	8	1	6	6	0	0	0	0
2	1	8	1	6	8	0	0	0	0
2	1	8	1.5	2	2	5.93059	6.79217	0.59994	1
2	1	8	1.5	2	4	0	0	0	0
2	1	8	1.5	2	6	0	0	0	0
2	1	8	1.5	2	8	0	0	0	0
2	1	8	1.5	4	2	5.53476	6.97834	3.39975	1
2	1	8	1.5	4	4	5.93059	6.79217	0.59994	1
2	1	8	1.5	4	6	0	0	0	0
2	1	8	1.5	4	8	0	0	0	0
2	1	8	1.5	6	2	6.50908	7.90063	4.59947	1
2	1	8	1.5	6	4	5.35097	6.38583	1.6998	1
2	1	8	1.5	6	6	5.93059	6.79217	0.59994	1
2	1	8	1.5	6	8	5.32151	5.83644	0.39995	1
2	1	8	2	2	2	5.35097	6.38583	1.59984	1
2	1	8	2	2	4	6.55458	6.97191	0.49997	1
2	1	8	2	2	6	4.09135	4.76022	0	1
2	1	8	2	2	8	0	0	0	0
2	1	8	2	4	2	6.50908	7.90063	3.59972	1
2	1	8	2	4	4	5.35097	6.38583	1.59984	1
2	1	8	2	4	6	5.72262	6.46909	0.59994	1
2	1	8	2	4	8	6.55458	6.97191	0.59994	1
2	1	8	2	6	2	6.50908	7.90063	4.59947	1
2	1	8	2	6	4	5.53476	6.97834	2.49973	1
2	1	8	2	6	6	5.35097	6.38583	1.6998	1
2	1	8	2	6	8	5.93059	6.79217	0.89986	1
2	1	8	2.5	2	2	5.78256	7.03879	1.59984	1
2	1	8	2.5	2	4	6.55458	6.97191	0.49997	1
2	1	8	2.5	2	6	6.08271	6.49257	0.19997	1
2	1	8	2.5	2	8	5.32151	5.83644	0.09997	1
2	1	8	2.5	4	2	6.50908	7.90063	3.59972	1
2	1	8	2.5	4	4	5.78256	7.03879	1.59984	1
2	1	8	2.5	4	6	5.93059	6.79217	0.69991	1
2	1	8	2.5	4	8	6.55458	6.97191	0.59994	1
2	1	8	2.5	6	2	6.50908	7.90063	4.59947	1
2	1	8	2.5	6	4	6.50908	7.90063	2.6997	1
2	1	8	2.5	6	6	5.78256	7.03879	1.6998	1
2	1	8	2.5	6	8	5.93059	6.79217	0.89986	1
2	1	9	1	2	2	0	0	0	0
2	1	9	1	2	4	0	0	0	0
2	1	9	1	2	6	0	0	0	0
2	1	9	1	2	8	0	0	0	0
2	1	9	1	4	2	5.16315	6.34904	3.09964	1
2	1	9	1	4	4	0	0	0	0
2	1	9	1	4	6	0	0	0	0
2	1	9	1	4	8	0	0	0	0
2	1	9	1	6	2	6.44902	7.77245	4.4995	1
2	1	9	1	6	4	5.48874	6.46079	0.79995	1
2	1	9	1	6	6	0	0	0	0
2	1	9	1	6	8	0	0	0	0
2	1	9	1.5	2	2	5.47893	6.26756	0.59994	1
2	1	9	1.5	2	4	0	0	0	0
2	1	9	1.5	2	6	0	0	0	0
2	1	9	1.5	2	8	0	0	0	0
2	1	9	1.5	4	2	6.44902	7.77245	3.3996	1
2	1	9	1.5	4	4	5.47893	6.26756	0.59994	1
2	1	9	1.5	4	6	1.61184	2.52286	0	1
2	1	9	1.5	4	8	0	0	0	0
2	1	9	1.5	6	2	6.44902	7.77245	4.4995	1
2	1	9	1.5	6	4	5.16315	6.34904	2.69967	1
2	1	9	1.5	6	6	5.47893	6.26756	0.59994	1
2	1	9	1.5	6	8	4.57802	5.15867	0.29998	1
2	1	9	2	2	2	5.18753	6.26696	1.59984	1
2	1	9	2	2	4	5.78402	6.24698	0.39998	1
2	1	9	2	2	6	0	0	0	0
2	1	9	2	2	8	0	0	0	0
2	1	9	2	4	2	6.44902	7.77245	3.59961	1
2	1	9	2	4	4	5.18753	6.26696	1.59984	1
2	1	9	2	4	6	5.47893	6.26756	0.59994	1
2	1	9	2	4	8	5.78402	6.24698	0.49995	1
2	1	9	2	6	2	6.44902	7.77245	4.4995	1
2	1	9	2	6	4	5.36459	6.71981	2.99963	1
2	1	9	2	6	6	5.18753	6.26696	1.6998	1
2	1	9	2	6	8	5.47893	6.26756	0.79989	1
2	1	9	2.5	2	2	5.58111	6.82303	1.99978	1
2	1	9	2.5	2	4	6.07127	6.57218	0.59994	1
2	1	9	2.5	2	6	5.78402	6.24698	0.19997	1
2	1	9	2.5	2	8	4.57802	5.15867	0	1
2	1	9	2.5	4	2	6.44902	7.77245	3.59961	1
2	1	9	2.5	4	4	5.58111	6.82303	1.99978	1
2	1	9	2.5	4	6	5.47893	6.26756	0.59994	1
2	1	9	2.5	4	8	6.07127	6.57218	0.59994	1
2	1	9	2.5	6	2	6.44902	7.77245	4.4995	1
2	1	9	2.5	6	4	6.44902	7.77245	3.19964	1
2	1	9	2.5	6	6	5.58111	6.82303	2.09974	1
2	1	9	2.5	6	8	5.48874	6.46079	1.59981	1
2	2	3	1	2	2	-1.2843	2.12328	0.29995	1
2	2	3	1	2	4	-10.0579	-9.12361	0.09998	1
2	2	3	1	2	6	-10.0579	-9.12361	0	1
2	2	3	1	2	8	0	0	0	0
2	2	3	1	4	2	-3.54011	-1.06905	1.19985	1
2	2	3	1	4	4	-1.2843	2.12328	0.29995	1
2	2	3	1	4	6	-10.2627	-9.40891	0.19997	1
2	2	3	1	4	8	-10.0579	-9.12361	0.09998	1
2	2	3	1	6	2	-0.516903	-1.15245	1.7998	1
2	2	3	1	6	4	-3.50813	-0.818843	0.29997	1
2	2	3	1	6	6	-1.2843	2.12328	0.29995	1
2	2	3	1	6	8	-1.2843	2.12328	0.19997	1
2	2	3	1.5	2	2	-3.50813	-0.818843	0.29995	1
2	2	3	1.5	2	4	-1.2843	2.12328	0.09999	1
2	2	3	1.5	2	6	-10.2627	-9.40891	0.09999	1
2	2	3	1.5	2	8	-10.0579	-9.12361	0	1
2	2	3	1.5	4	2	-0.516903	-1.15245	1.7998	1
2	2	3	1.5	4	4	-3.50813	-0.818843	0.29995	1
2	2	3	1.5	4	6	-1.2843	2.12328	0.29995	1
2	2	3	1.5	4	8	-1.2843	2.12328	0.09999	1
2	2	3	1.5	6	2	-0.516903	-1.15245	1.7998	1
2	2	3	1.5	6	4	-3.54011	-1.06905	1.19985	1
2	2	3	1.5	6	6	-3.50813	-0.818843	0.29995	1
2	2	3	1.5	6	8	-1.2843	2.12328	0.29995	1
2	2	3	2	2	2	-3.54011	-1.06905	0.39994	1
2	2	3	2	2	4	-1.2843	2.12328	0.29995	1
2	2	3	2	2	6	-1.2843	2.12328	0.29995	1
2	2	3	2	2	8	-1.2843	2.12328	0.09999	1
2	2	3	2	4	2	-0.516903	-1.15245	1.7998	1
2	2	3	2	4	4	-3.54011	-1.06905	0.39994	1
2	2	3	2	4	6	-3.50813	-0.818843	0.29995	1
2	2	3	2	4	8	-1.2843	2.12328	0.29995	1
2	2	3	2	6	2	-1.09215	1.68487	1.7998	1
2	2	3	2	6	4	-0.516903	-1.15245	1.19985	1
2	2	3	2	6	6	-3.54011	-1.06905	0.39994	1
2	2	3	2	6	8	-3.50813	-0.818843	0.39994	1
2	2	3	2.5	2	2	-0.516903	-1.15245	0.39995	1
2	2	3	2.5	2	4	-3.30239	-0.620341	0.29995	1
2	2	3	2.5	2	6	-1.2843	2.12328	0.29995	1
2	2	3	2.5	2	8	-1.2843	2.12328	0.29995	1
2	2	3	2.5	4	2	-1.09215	1.68487	1.7998	1
2	2	3	2.5	4	4	-0.516903	-1.15245	0.39995	1
2	2	3	2.5	4	6	-3.50813	-0.818843	0.29995	1
2	2	3	2.5	4	8	-3.30239	-0.620341	0.29995	1
2	2	3	2.5	6	2	-1.09215	1.68487	1.7998	1
2	2	3	2.5	6	4	-0.516903	-1.15245	1.7998	1
2	2	3	2.5	6	6	-0.516903	-1.15245	0.39995	1
2	2	3	2.5	6	8	-2.74598	-0.867598	0.39994	1
2	2	4	1	2	2	1.03677	1.63515	0.29999	1
2	2	4	1	2	4	8.28728	7.73766	0	1
2	2	4	1	2	6	0	0	0	0
2	2	4	1	2	8	0	0	0	0
2	2	4	1	4	2	-3.19596	-0.842957	2.29972	1
2	2	4	1	4	4	1.03677	1.63515	0.29999	1
2	2	4	1	4	6	8.55398	7.97528	0.19999	1
2	2	4	1	4	8	8.28728	7.73766	0	1
2	2	4	1	6	2	-0.795312	-1.22737	3.29964	1
2	2	4	1	6	4	-1.3901	1.9385	0.69996	1
2	2	4	1	6	6	1.03677	1.63515	0.29999	1
2	2	4	1	6	8	8.55398	7.97528	0.19999	1
2	2	4	1.5	2	2	-1.3901	1.9385	0.39995	1
2	2	4	1.5	2	4	8.55398	7.97528	0.19999	1
2	2	4	1.5	2	6	8.55398	7.97528	0.19999	1
2	2	4	1.5	2	8	8.28728	7.73766	0.1	1
2	2	4	1.5	4	2	-0.795312	-1.22737	2.49971	1
2	2	4	1.5	4	4	-1.3901	1.9385	0.39995	1
2	2	4	1.5	4	6	1.03677	1.63515	0.29998	1
2	2	4	1.5	4	8	8.55398	7.97528	0.19999	1
2	2	4	1.5	6	2	-1.493	0.974821	3.49961	1
2	2	4	1.5	6	4	-3.19596	-0.842957	1.59985	1
2	2	4	1.5	6	6	-1.3901	1.9385	0.39995	1
2	2	4	1.5	6	8	1.03677	1.63515	0.29998	1
2	2	4	2	2	2	-3.19596	-0.842957	0.59992	1
2	2	4	2	2	4	-1.3901	1.9385	0.29998	1
2	2	4	2	2	6	1.03677	1.63515	0.29998	1
2	2	4	2	2	8	8.55398	7.97528	0.19999	1
2	2	4	2	4	2	-1.78208	-0.308407	2.89963	1
2	2	4	2	4	4	-3.19596	-0.842957	0.59992	1
2	2	4	2	4	6	-1.3901	1.9385	0.39995	1
2	2	4	2	4	8	-1.3901	1.9385	0.29998	1
2	2	4	2	6	2	-1.493	0.974821	3.49961	1
2	2	4	2	6	4	-0.795312	-1.22737	2.59974	1
2	2	4	2	6	6	-3.19596	-0.842957	0.59992	1
2	2	4	2	6	8	-3.49927	-1.23856	0.59992	1
2	2	4	2.5	2	2	-0.795312	-1.22737	0.79988	1
2	2	4	2.5	2	4	-1.3901	1.9385	0.39995	1
2	2	4	2.5	2	6	1.03677	1.63515	0.29998	1
2	2	4	2.5	2	8	1.03677	1.63515	0.29998	1
2	2	4	2.5	4	2	-1.493	0.974821	2.99963	1
2	2	4	2.5	4	4	-0.795312	-1.22737	0.79988	1
2	2	4	2.5	4	6	-3.49927	-1.23856	0.39995	1
2	2	4	2.5	4	8	-1.3901	1.9385	0.39995	1
2	2	4	2.5	6	2	-2.85989	-0.0386761	3.59963	1
2	2	4	2.5	6	4	-1.493	0.974821	2.79971	1
2	2	4	2.5	6	6	-0.795312	-1.22737	0.79988	1
2	2	4	2.5	6	8	-2.17116	-0.378895	0.69989	1
2	2	5	1	2	2	7.1698	6.93835	0.29997	1
2	2	5	1	2	4	6.96414	6.75876	0	1
2	2	5	1	2	6	0	0	0	0
2	2	5	1	2	8	0	0	0	0
2	2	5	1	4	2	-3.44088	-1.16403	2.19971	1
2	2	5	1	4	4	7.1698	6.93835	0.29997	1
2	2	5	1	4	6	7.1698	6.93835	0.19999	1
2	2	5	1	4	8	6.96414	6.75876	0	1
2	2	5	1	6	2	-1.33144	-0.431509	3.40052	1
2	2	5	1	6	4	-0.270492	-0.620317	1.99979	1
2	2	5	1	6	6	7.1698	6.93835	0.29997	1
2	2	5	1	6	8	7.1698	6.93835	0.2	1
2	2	5	1.5	2	2	-0.270492	-0.620317	0.59992	1
2	2	5	1.5	2	4	7.1698	6.93835	0.19999	1
2	2	5	1.5	2	6	6.96414	6.75876	0.1	1
2	2	5	1.5	2	8	6.96414	6.75876	0.1	1
2	2	5	1.5	4	2	-1.99708	-0.202014	2.69967	1
2	2	5	1.5	4	4	-0.270492	-0.620317	0.59992	1
2	2	5	1.5	4	6	7.1698	6.93835	0.2	1
2	2	5	1.5	4	8	7.1698	6.93835	0.19999	1
2	2	5	1.5	6	2	-1.49404	-0.503499	3.50049	1
2	2	5	1.5	6	4	-2.91349	-0.893036	2.19975	1
2	2	5	1.5	6	6	-0.270492	-0.620317	0.59992	1
2	2	5	1.5	6	8	2.74757	3.10018	0.29998	1
2	2	5	2	2	2	-2.91349	-0.893036	1.09987	1
2	2	5	2	2	4	2.74757	3.10018	0.29998	1
2	2	5	2	2	6	7.1698	6.93835	0.19999	1
2	2	5	2	2	8	7.1698	6.93835	0.19999	1
2	2	5	2	4	2	-1.49404	-0.503499	2.89963	1
2	2	5	2	4	4	-2.91349	-0.893036	1.09987	1
2	2	5	2	4	6	-0.270492	-0.620317	0.49995	1
2	2	5	2	4	8	2.74757	3.10018	0.29998	1
2	2	5	2	6	2	-3.36136	-0.261989	3.60049	1
2	2	5	2	6	4	-1.33144	-0.431509	2.69969	1
2	2	5	2	6	6	-2.91349	-0.893036	1.19986	1
2	2	5	2	6	8	-3.44088	-1.16403	1.09985	1
2	2	5	2.5	2	2	-1.99708	-0.202014	1.49982	1
2	2	5	2.5	2	4	2.74757	3.10018	0.29998	1
2	2	5	2.5	2	6	7.1698	6.93835	0.19999	1
2	2	5	2.5	2	8	7.1698	6.93835	0.19999	1
2	2	5	2.5	4	2	-1.49404	-0.503499	2.89963	1
2	2	5	2.5	4	4	-1.99708	-0.202014	1.49982	1
2	2	5	2.5	4	6	-3.44088	-1.16403	0.99986	1
2	2	5	2.5	4	8	2.74757	3.10018	0.29998	1
2	2	5	2.5	6	2	-3.36136	-0.261989	3.60049	1
2	2	5	2.5	6	4	-1.49404	-0.503499	2.79966	1
2	2	5	2.5	6	6	-1.99708	-0.202014	1.59981	1
2	2	5	2.5	6	8	-2.70102	-0.952601	1.49983	1
2	2	6	1	2	2	5.24299	5.30785	0.39996	1
2	2	6	1	2	4	5.06452	5.14967	0	1
2	2	6	1	2	6	0	0	0	0
2	2	6	1	2	8	0	0	0	0
2	2	6	1	4	2	-3.31714	-1.06293	2.19971	1
2	2	6	1	4	4	5.24299	5.30785	0.39996	1
2	2	6	1	4	6	5.06452	5.14967	0.1	1
2	2	6	1	4	8	5.06452	5.14967	0	1
2	2	6	1	6	2	-1.33341	-0.396179	3.4997	1
2	2	6	1	6	4	-0.905302	-0.206925	1.99979	1
2	2	6	1	6	6	5.24299	5.30785	0.39996	1
2	2	6	1	6	8	5.24299	5.30785	0.19999	1
2	2	6	1.5	2	2	-0.905302	-0.206925	0.89991	1
2	2	6	1.5	2	4	5.24299	5.30785	0.19999	1
2	2	6	1.5	2	6	5.06452	5.14967	0.1	1
2	2	6	1.5	2	8	5.06452	5.14967	0.1	1
2	2	6	1.5	4	2	-2.35335	-0.53789	2.69967	1
2	2	6	1.5	4	4	-0.905302	-0.206925	0.89991	1
2	2	6	1.5	4	6	5.24299	5.30785	0.39996	1
2	2	6	1.5	4	8	5.24299	5.30785	0.19999	1
2	2	6	1.5	6	2	-1.33341	-0.396179	3.4997	1
2	2	6	1.5	6	4	-3.31714	-1.06293	2.09974	1
2	2	6	1.5	6	6	-0.905302	-0.206925	0.89991	1
2	2	6	1.5	6	8	3.13778	3.4266	0.49995	1
2	2	6	2	2	2	-3.42883	-1.44575	1.19986	1
2	2	6	2	2	4	2.64756	3.05765	0.59992	1
2	2	6	2	2	6	5.24299	5.30785	0.19999	1
2	2	6	2	2	8	5.06452	5.14967	0.1	1
2	2	6	2	4	2	-1.33341	-0.396179	2.79966	1
2	2	6	2	4	4	-3.42883	-1.44575	1.19986	1
2	2	6	2	4	6	-0.905302	-0.206925	0.89991	1
2	2	6	2	4	8	2.64756	3.05765	0.59992	1
2	2	6	2	6	2	-3.04169	-0.584086	3.59967	1
2	2	6	2	6	4	-1.33341	-0.396179	2.69969	1
2	2	6	2	6	6	-3.42883	-1.44575	1.19986	1
2	2	6	2	6	8	-3.31714	-1.06293	0.99986	1
2	2	6	2.5	2	2	-1.33341	-0.396179	1.6998	1
2	2	6	2.5	2	4	2.64756	3.05765	0.59992	1
2	2	6	2.5	2	6	5.24299	5.30785	0.19999	1
2	2	6	2.5	2	8	5.06452	5.14967	0.1	1
2	2	6	2.5	4	2	-3.04169	-0.584086	2.89963	1
2	2	6	2.5	4	4	-1.33341	-0.396179	1.6998	1
2	2	6	2.5	4	6	-0.905302	-0.206925	0.89991	1
2	2	6	2.5	4	8	2.64756	3.05765	0.59992	1
2	2	6	2.5	6	2	-3.04169	-0.584086	3.59967	1
2	2	6	2.5	6	4	-1.33341	-0.396179	2.69969	1
2	2	6	2.5	6	6	-1.33341	-0.396179	1.6998	1
2	2	6	2.5	6	8	-2.65676	-0.988318	1.29986	1
2	2	7	1	2	2	3.03	3.44276	0.49997	1
2	2	7	1	2	4	0	0	0	0
2	2	7	1	2	6	0	0	0	0
2	2	7	1	2	8	0	0	0	0
2	2	7	1	4	2	-3.73493	-1.48924	2.29977	1
2	2	7	1	4	4	3.03	3.44276	0.49997	1
2	2	7	1	4	6	2.89901	3.30831	0.1	1
2	2	7	1	4	8	0	0	0	0
2	2	7	1	6	2	-2.26926	-0.508024	3.4996	1
2	2	7	1	6	4	-1.51236	-0.565268	1.99978	1
2	2	7	1	6	6	3.03	3.44276	0.49997	1
2	2	7	1	6	8	3.03	3.44276	0.39996	1
2	2	7	1.5	2	2	-1.51236	-0.565268	0.89992	1
2	2	7	1.5	2	4	3.03	3.44276	0.39996	1
2	2	7	1.5	2	6	2.89901	3.30831	0.1	1
2	2	7	1.5	2	8	2.97541	3.38445	0	1
2	2	7	1.5	4	2	-2.26926	-0.508024	2.79973	1
2	2	7	1.5	4	4	-1.51236	-0.565268	0.89992	1
2	2	7	1.5	4	6	3.03	3.44276	0.49995	1
2	2	7	1.5	4	8	3.03	3.44276	0.39996	1
2	2	7	1.5	6	2	-2.61202	-0.574904	3.59959	1
2	2	7	1.5	6	4	-3.5262	-1.46446	2.29972	1
2	2	7	1.5	6	6	-1.51236	-0.565268	0.89992	1
2	2	7	1.5	6	8	1.7138	2.29182	0.69991	1
2	2	7	2	2	2	-3.5262	-1.46446	1.9998	1
2	2	7	2	2	4	1.7138	2.29182	0.59992	1
2	2	7	2	2	6	3.03	3.44276	0.39996	1
2	2	7	2	2	8	3.03	3.44276	0.19999	1
2	2	7	2	4	2	-2.61202	-0.574904	2.89972	1
2	2	7	2	4	4	-3.5262	-1.46446	1.9998	1
2	2	7	2	4	6	-1.51236	-0.565268	0.89992	1
2	2	7	2	4	8	1.7138	2.29182	0.59992	1
2	2	7	2	6	2	-2.61202	-0.574904	3.59959	1
2	2	7	2	6	4	-2.26926	-0.508024	2.69967	1
2	2	7	2	6	6	-3.5262	-1.46446	1.9998	1
2	2	7	2	6	8	-3.73493	-1.48924	1.09985	1
2	2	7	2.5	2	2	-2.26926	-0.508024	2.39975	1
2	2	7	2.5	2	4	1.7138	2.29182	0.59992	1
2	2	7	2.5	2	6	3.03	3.44276	0.39996	1
2	2	7	2.5	2	8	3.03	3.44276	0.19999	1
2	2	7	2.5	4	2	-2.61202	-0.574904	2.89972	1
2	2	7	2.5	4	4	-2.26926	-0.508024	2.39975	1
2	2	7	2.5	4	6	-1.4005	-0.242902	0.9999	1
2	2	7	2.5	4	8	1.7138	2.29182	0.59992	1
2	2	7	2.5	6	2	-2.61202	-0.574904	3.59959	1
2	2	7	2.5	6	4	-2.61202	-0.574904	2.79966	1
2	2	7	2.5	6	6	-2.26926	-0.508024	2.39975	1
2	2	7	2.5	6	8	-2.65746	-0.844424	1.39985	1
2	2	8	1	2	2	4.17892	4.41377	0.59993	1
2	2	8	1	2	4	0	0	0	0
2	2	8	1	2	6	0	0	0	0
2	2	8	1	2	8	0	0	0	0
2	2	8	1	4	2	-3.87042	-1.58311	2.39972	1
2	2	8	1	4	4	4.17892	4.41377	0.59993	1
2	2	8	1	4	6	4.15541	4.39308	0	1
2	2	8	1	4	8	0	0	0	0
2	2	8	1	6	2	-2.74428	-0.958135	3.39962	1
2	2	8	1	6	4	-1.34284	-0.241211	1.89976	1
2	2	8	1	6	6	4.17892	4.41377	0.59993	1
2	2	8	1	6	8	4.07887	4.31622	0.39996	1
2	2	8	1.5	2	2	-1.34284	-0.241211	1.69984	1
2	2	8	1.5	2	4	4.17892	4.41377	0.49995	1
2	2	8	1.5	2	6	4.15541	4.39308	0	1
2	2	8	1.5	2	8	0	0	0	0
2	2	8	1.5	4	2	-2.74428	-0.958135	2.7997	1
2	2	8	1.5	4	4	-1.34284	-0.241211	1.69984	1
2	2	8	1.5	4	6	4.17892	4.41377	0.59993	1
2	2	8	1.5	4	8	4.17892	4.41377	0.49995	1
2	2	8	1.5	6	2	-3.1919	-1.18771	3.4996	1
2	2	8	1.5	6	4	-3.61371	-1.47794	2.29972	1
2	2	8	1.5	6	6	-1.34284	-0.241211	1.69984	1
2	2	8	1.5	6	8	1.70342	2.22285	0.69992	1
2	2	8	2	2	2	-3.61371	-1.47794	2.0998	1
2	2	8	2	2	4	1.70342	2.22285	0.59994	1
2	2	8	2	2	6	4.07887	4.31622	0.29997	1
2	2	8	2	2	8	4.07887	4.31622	0.1	1
2	2	8	2	4	2	-3.1919	-1.18771	2.89968	1
2	2	8	2	4	4	-3.61371	-1.47794	2.0998	1
2	2	8	2	4	6	-1.80296	-0.880056	0.9999	1
2	2	8	2	4	8	1.70342	2.22285	0.59994	1
2	2	8	2	6	2	-3.1919	-1.18771	3.4996	1
2	2	8	2	6	4	-2.74428	-0.958135	2.59969	1
2	2	8	2	6	6	-3.61371	-1.47794	2.0998	1
2	2	8	2	6	8	-3.87042	-1.58311	1.19983	1
2	2	8	2.5	2	2	-2.74428	-0.958135	2.39977	1
2	2	8	2.5	2	4	1.70342	2.22285	0.59994	1
2	2	8	2.5	2	6	4.07887	4.31622	0.29997	1
2	2	8	2.5	2	8	4.07887	4.31622	0.1	1
2	2	8	2.5	4	2	-3.1919	-1.18771	2.89968	1
2	2	8	2.5	4	4	-2.74428	-0.958135	2.39977	1
2	2	8	2.5	4	6	-2.10978	-0.701675	1.09988	1
2	2	8	2.5	4	8	1.70342	2.22285	0.59994	1
2	2	8	2.5	6	2	-3.1919	-1.18771	3.4996	1
2	2	8	2.5	6	4	-3.1919	-1.18771	2.69967	1
2	2	8	2.5	6	6	-2.74428	-0.958135	2.39977	1
2	2	8	2.5	6	8	-2.74428	-0.958135	1.59981	1
2	2	9	1	2	2	3.39945	3.73932	1.39989	1
2	2	9	1	2	4	0	0	0	0
2	2	9	1	2	6	0	0	0	0
2	2	9	1	2	8	0	0	0	0
2	2	9	1	4	2	-3.99191	-1.64794	2.39972	1
2	2	9	1	4	4	3.39945	3.73932	1.39989	1
2	2	9	1	4	6	4.31653	4.40239	0	1
2	2	9	1	4	8	0	0	0	0
2	2	9	1	6	2	-3.48441	-1.51389	3.39962	1
2	2	9	1	6	4	-1.74588	-0.589135	1.89976	1
2	2	9	1	6	6	3.39945	3.73932	1.39989	1
2	2	9	1	6	8	4.68259	4.84481	0.29996	1
2	2	9	1.5	2	2	-1.74588	-0.589135	1.69984	1
2	2	9	1.5	2	4	3.39945	3.73932	0.49995	1
2	2	9	1.5	2	6	0	0	0	0
2	2	9	1.5	2	8	0	0	0	0
2	2	9	1.5	4	2	-2.9654	-1.07953	2.69972	1
2	2	9	1.5	4	4	-1.74588	-0.589135	1.69984	1
2	2	9	1.5	4	6	3.39945	3.73932	0.69993	1
2	2	9	1.5	4	8	3.39945	3.73932	0.49995	1
2	2	9	1.5	6	2	-3.48441	-1.51389	3.39962	1
2	2	9	1.5	6	4	-3.70009	-1.47674	2.29972	1
2	2	9	1.5	6	6	-1.74588	-0.589135	1.69984	1
2	2	9	1.5	6	8	0.776699	1.51238	0.89991	1
2	2	9	2	2	2	-3.70009	-1.47674	2.0998	1
2	2	9	2	2	4	3.39945	3.73932	0.49995	1
2	2	9	2	2	6	4.60647	4.76829	0.1	1
2	2	9	2	2	8	4.68259	4.84481	0	1
2	2	9	2	4	2	-3.48441	-1.51389	2.7997	1
2	2	9	2	4	4	-3.70009	-1.47674	2.0998	1
2	2	9	2	4	6	-1.74588	-0.589135	0.99988	1
2	2	9	2	4	8	3.39945	3.73932	0.49995	1
2	2	9	2	6	2	-3.48441	-1.51389	3.39962	1
2	2	9	2	6	4	-3.48441	-1.51389	2.59969	1
2	2	9	2	6	6	-3.70009	-1.47674	2.0998	1
2	2	9	2	6	8	-3.99191	-1.64794	1.39982	1
2	2	9	2.5	2	2	-2.9654	-1.07953	2.29979	1
2	2	9	2.5	2	4	3.39945	3.73932	0.49995	1
2	2	9	2.5	2	6	4.60647	4.76829	0.1	1
2	2	9	2.5	2	8	4.68259	4.84481	0	1
2	2	9	2.5	4	2	-3.48441	-1.51389	2.7997	1
2	2	9	2.5	4	4	-2.9654	-1.07953	2.29979	1
2	2	9	2.5	4	6	-2.49521	-0.847025	1.19988	1
2	2	9	2.5	4	8	3.39945	3.73932	0.49995	1
2	2	9	2.5	6	2	-3.48441	-1.51389	3.39962	1
2	2	9	2.5	6	4	-3.48441	-1.51389	2.59969	1
2	2	9	2.5	6	6	-2.9654	-1.07953	2.29979	1
2	2	9	2.5	6	8	-2.9654	-1.07953	1.69982	1
2	3	3	1	2	2	8.51221	8.74776	0.20002	1
2	3	3	1	2	4	-5.66819	-5.95999	0	1
2	3	3	1	2	6	0	0	0	0
2	3	3	1	2	8	0	0	0	0
2	3	3	1	4	2	4.43404	6.00233	2.90073	1
2	3	3	1	4	4	8.51221	8.74776	0.20002	1
2	3	3	1	4	6	-5.66819	-5.95999	0	1
2	3	3	1	4	8	-5.66819	-5.95999	0	1
2	3	3	1	6	2	5.24751	6.83407	4.50116	1
2	3	3	1	6	4	12.0012	12.5009	1.60039	1
2	3	3	1	6	6	8.51221	8.74776	0.20002	1
2	3	3	1	6	8	8.51221	8.74776	0.10004	1
2	3	3	1.5	2	2	11.8516	12.3494	0.20003	1
2	3	3	1.5	2	4	8.51221	8.74776	0.10004	1
2	3	3	1.5	2	6	-5.66819	-5.95999	0	1
2	3	3	1.5	2	8	-5.66819	-5.95999	0	1
2	3	3	1.5	4	2	4.43404	6.00233	2.90073	1
2	3	3	1.5	4	4	11.8516	12.3494	0.20003	1
2	3	3	1.5	4	6	8.51221	8.74776	0.10004	1
2	3	3	1.5	4	8	8.51221	8.74776	0.10004	1
2	3	3	1.5	6	2	5.13394	7.13237	4.60118	1
2	3	3	1.5	6	4	12.0012	12.5009	1.60039	1
2	3	3	1.5	6	6	11.8516	12.3494	0.20006	1
2	3	3	1.5	6	8	8.51221	8.74776	0.20006	1
2	3	3	2	2	2	12.0012	12.5009	0.60015	1
2	3	3	2	2	4	8.51221	8.74776	0.20003	1
2	3	3	2	2	6	8.51221	8.74776	0.10004	1
2	3	3	2	2	8	8.51221	8.74776	0.10004	1
2	3	3	2	4	2	4.43404	6.00233	2.90073	1
2	3	3	2	4	4	12.0012	12.5009	0.60015	1
2	3	3	2	4	6	11.8516	12.3494	0.20003	1
2	3	3	2	4	8	8.51221	8.74776	0.20003	1
2	3	3	2	6	2	5.13394	7.13237	4.60118	1
2	3	3	2	6	4	4.43404	6.00233	1.60039	1
2	3	3	2	6	6	12.0012	12.5009	0.60016	1
2	3	3	2	6	8	11.8516	12.3494	0.50013	1
2	3	3	2.5	2	2	11.2295	11.9203	0.80019	1
2	3	3	2.5	2	4	12.0012	12.5009	0.40009	1
2	3	3	2.5	2	6	8.51221	8.74776	0.10004	1
2	3	3	2.5	2	8	8.51221	8.74776	0.10004	1
2	3	3	2.5	4	2	5.13394	7.13237	2.90073	1
2	3	3	2.5	4	4	11.2295	11.9203	0.80019	1
2	3	3	2.5	4	6	12.0012	12.5009	0.60015	1
2	3	3	2.5	4	8	12.0012	12.5009	0.40009	1
2	3	3	2.5	6	2	5.13394	7.13237	4.70123	1
2	3	3	2.5	6	4	5.29599	6.90296	1.60039	1
2	3	3	2.5	6	6	11.2295	11.9203	0.80019	1
2	3	3	2.5	6	8	11.2295	11.9203	0.80019	1
2	3	4	1	2	2	8.23896	8.81591	0.10003	1
2	3	4	1	2	4	0	0	0	0
2	3	4	1	2	6	0	0	0	0
2	3	4	1	2	8	0	0	0	0
2	3	4	1	4	2	9.25486	9.80603	3.90102	1
2	3	4	1	4	4	8.23896	8.81591	0.10003	1
2	3	4	1	4	6	4.32038	5.01899	0.10002	1
2	3	4	1	4	8	0	0	0	0
2	3	4	1	6	2	7.85796	8.83744	6.9017	1
2	3	4	1	6	4	11.7515	11.8144	1.70042	1
2	3	4	1	6	6	8.23896	8.81591	0.10003	1
2	3	4	1	6	8	4.32038	5.01899	0.10003	1
2	3	4	1.5	2	2	11.7515	11.8144	0.40011	1
2	3	4	1.5	2	4	8.23896	8.81591	0.10003	1
2	3	4	1.5	2	6	4.32038	5.01899	0	1
2	3	4	1.5	2	8	0	0	0	0
2	3	4	1.5	4	2	9.7013	10.2599	5.10114	1
2	3	4	1.5	4	4	11.7515	11.8144	0.40011	1
2	3	4	1.5	4	6	8.23896	8.81591	0.10003	1
2	3	4	1.5	4	8	8.23896	8.81591	0.10003	1
2	3	4	1.5	6	2	5.51486	7.2631	7.00168	1
2	3	4	1.5	6	4	11.8775	11.941	1.70042	1
2	3	4	1.5	6	6	11.7515	11.8144	1.30034	1
2	3	4	1.5	6	8	8.23896	8.81591	1.00026	1
2	3	4	2	2	2	11.8775	11.941	1.40038	1
2	3	4	2	2	4	8.23896	8.81591	0.60016	1
2	3	4	2	2	6	8.23896	8.81591	0.20003	1
2	3	4	2	2	8	8.23896	8.81591	0.20003	1
2	3	4	2	4	2	7.85796	8.83744	5.30127	1
2	3	4	2	4	4	11.8775	11.941	1.40038	1
2	3	4	2	4	6	11.7515	11.8144	0.90024	1
2	3	4	2	4	8	8.23896	8.81591	0.60016	1
2	3	4	2	6	2	5.51486	7.2631	7.30169	1
2	3	4	2	6	4	9.73382	10.3336	1.80043	1
2	3	4	2	6	6	11.8775	11.941	1.40038	1
2	3	4	2	6	8	11.7515	11.8144	1.30034	1
2	3	4	2.5	2	2	9.73382	10.3336	1.60042	1
2	3	4	2.5	2	4	10.8038	11.081	1.00028	1
2	3	4	2.5	2	6	11.4904	11.5701	0.60017	1
2	3	4	2.5	2	8	8.23896	8.81591	0.50014	1
2	3	4	2.5	4	2	5.51486	7.2631	5.60124	1
2	3	4	2.5	4	4	9.73382	10.3336	1.60042	1
2	3	4	2.5	4	6	10.8038	11.081	1.20032	1
2	3	4	2.5	4	8	10.8038	11.081	1.20032	1
2	3	4	2.5	6	2	5.51486	7.2631	7.40174	1
2	3	4	2.5	6	4	7.85796	8.83744	2.20048	1
2	3	4	2.5	6	6	9.73382	10.3336	1.60042	1
2	3	4	2.5	6	8	10.8038	11.081	1.60042	1
2	3	5	1	2	2	8.65115	9.07537	0.20003	1
2	3	5	1	2	4	0	0	0	0
2	3	5	1	2	6	0	0	0	0
2	3	5	1	2	8	0	0	0	0
2	3	5	1	4	2	8.4613	9.11714	4.00101	1
2	3	5	1	4	4	8.65115	9.07537	0.20003	1
2	3	5	1	4	6	4.83471	5.69017	0	1
2	3	5	1	4	8	0	0	0	0
2	3	5	1	6	2	8.38405	9.24444	5.40139	1
2	3	5	1	6	4	11.2415	11.4087	2.60068	1
2	3	5	1	6	6	8.65115	9.07537	0.20003	1
2	3	5	1	6	8	4.83471	5.69017	0	1
2	3	5	1.5	2	2	11.2415	11.4087	0.60015	1
2	3	5	1.5	2	4	8.65115	9.07537	0.10003	1
2	3	5	1.5	2	6	0	0	0	0
2	3	5	1.5	2	8	0	0	0	0
2	3	5	1.5	4	2	9.22011	9.86986	4.00101	1
2	3	5	1.5	4	4	11.2415	11.4087	0.60015	1
2	3	5	1.5	4	6	8.65115	9.07537	0.20003	1
2	3	5	1.5	4	8	8.65115	9.07537	0.10003	1
2	3	5	1.5	6	2	5.00406	6.8117	7.2017	1
2	3	5	1.5	6	4	8.4613	9.11714	3.80096	1
2	3	5	1.5	6	6	11.2415	11.4087	1.40037	1
2	3	5	1.5	6	8	8.65115	9.07537	1.00026	1
2	3	5	2	2	2	8.4613	9.11714	1.80043	1
2	3	5	2	2	4	8.65115	9.07537	0.60016	1
2	3	5	2	2	6	8.65115	9.07537	0.50014	1
2	3	5	2	2	8	8.65115	9.07537	0.4001	1
2	3	5	2	4	2	7.21289	8.38715	5.60134	1
2	3	5	2	4	4	8.4613	9.11714	1.80043	1
2	3	5	2	4	6	11.2415	11.4087	1.00025	1
2	3	5	2	4	8	8.65115	9.07537	0.60016	1
2	3	5	2	6	2	5.00406	6.8117	7.2017	1
2	3	5	2	6	4	9.22011	9.86986	4.00088	1
2	3	5	2	6	6	8.4613	9.11714	1.80043	1
2	3	5	2	6	8	11.2415	11.4087	1.30034	1
2	3	5	2.5	2	2	9.22011	9.86986	2.00035	1
2	3	5	2.5	2	4	9.90289	10.3292	1.20032	1
2	3	5	2.5	2	6	11.689	11.821	0.60017	1
2	3	5	2.5	2	8	11.2415	11.4087	0.4001	1
2	3	5	2.5	4	2	5.00406	6.8117	5.80132	1
2	3	5	2.5	4	4	9.22011	9.86986	2.00035	1
2	3	5	2.5	4	6	9.08231	9.65676	1.5004	1
2	3	5	2.5	4	8	9.90289	10.3292	1.20032	1
2	3	5	2.5	6	2	5.00406	6.8117	7.30175	1
2	3	5	2.5	6	4	4.97973	6.61465	4.30099	1
2	3	5	2.5	6	6	9.22011	9.86986	2.00035	1
2	3	5	2.5	6	8	9.08231	9.65676	1.80049	1
2	3	6	1	2	2	8.8733	9.25246	0.50013	1
2	3	6	1	2	4	0	0	0	0
2	3	6	1	2	6	0	0	0	0
2	3	6	1	2	8	0	0	0	0
2	3	6	1	4	2	8.94927	9.50836	5.20129	1
2	3	6	1	4	4	8.8733	9.25246	0.50013	1
2	3	6	1	4	6	0	0	0	0
2	3	6	1	4	8	0	0	0	0
2	3	6	1	6	2	7.713	8.73738	6.90172	1
2	3	6	1	6	4	10.6061	10.8424	2.60068	1
2	3	6	1	6	6	8.8733	9.25246	0.50013	1
2	3	6	1	6	8	4.86018	5.6254	0.10007	1
2	3	6	1.5	2	2	10.6061	10.8424	0.70019	1
2	3	6	1.5	2	4	8.8733	9.25246	0.10003	1
2	3	6	1.5	2	6	0	0	0	0
2	3	6	1.5	2	8	0	0	0	0
2	3	6	1.5	4	2	8.31671	9.14407	5.40121	1
2	3	6	1.5	4	4	10.6061	10.8424	0.70019	1
2	3	6	1.5	4	6	8.8733	9.25246	0.40014	1
2	3	6	1.5	4	8	8.8733	9.25246	0.30007	1
2	3	6	1.5	6	2	4.92825	6.58069	7.1017	1
2	3	6	1.5	6	4	8.94927	9.50836	3.80096	1
2	3	6	1.5	6	6	10.6061	10.8424	1.30035	1
2	3	6	1.5	6	8	8.8733	9.25246	0.90023	1
2	3	6	2	2	2	8.94927	9.50836	1.80043	1
2	3	6	2	2	4	10.6061	10.8424	0.70017	1
2	3	6	2	2	6	8.8733	9.25246	0.50014	1
2	3	6	2	2	8	8.8733	9.25246	0.50014	1
2	3	6	2	4	2	6.25826	7.63883	5.60134	1
2	3	6	2	4	4	8.94927	9.50836	1.80043	1
2	3	6	2	4	6	11.2575	11.4002	1.10032	1
2	3	6	2	4	8	10.6061	10.8424	0.70017	1
2	3	6	2	6	2	4.92825	6.58069	7.20175	1
2	3	6	2	6	4	8.31671	9.14407	4.00088	1
2	3	6	2	6	6	8.94927	9.50836	1.80043	1
2	3	6	2	6	8	11.2575	11.4002	1.20031	1
2	3	6	2.5	2	2	8.31671	9.14407	2.00035	1
2	3	6	2.5	2	4	9.45367	9.96387	1.30033	1
2	3	6	2.5	2	6	11.1083	11.2858	0.90026	1
2	3	6	2.5	2	8	11.2575	11.4002	0.50014	1
2	3	6	2.5	4	2	4.92825	6.58069	5.70132	1
2	3	6	2.5	4	4	8.31671	9.14407	2.00035	1
2	3	6	2.5	4	6	8.8316	9.45158	1.60047	1
2	3	6	2.5	4	8	9.45367	9.96387	1.30033	1
2	3	6	2.5	6	2	4.92825	6.58069	7.20175	1
2	3	6	2.5	6	4	6.25826	7.63883	4.20101	1
2	3	6	2.5	6	6	8.31671	9.14407	2.00035	1
2	3	6	2.5	6	8	8.8316	9.45158	1.70046	1
2	3	7	1	2	2	9.03174	9.39141	0.50014	1
2	3	7	1	2	4	0	0	0	0
2	3	7	1	2	6	0	0	0	0
2	3	7	1	2	8	0	0	0	0
2	3	7	1	4	2	8.75621	9.34982	5.20129	1
2	3	7	1	4	4	9.03174	9.39141	0.50014	1
2	3	7	1	4	6	0	0	0	0
2	3	7	1	4	8	0	0	0	0
2	3	7	1	6	2	6.81938	8.04031	7.00177	1
2	3	7	1	6	4	10.6771	10.8925	3.30088	1
2	3	7	1	6	6	9.03174	9.39141	0.50014	1
2	3	7	1	6	8	4.29893	5.08821	0.09999	1
2	3	7	1.5	2	2	10.6771	10.8925	1.40037	1
2	3	7	1.5	2	4	9.03174	9.39141	0.20003	1
2	3	7	1.5	2	6	0	0	0	0
2	3	7	1.5	2	8	0	0	0	0
2	3	7	1.5	4	2	8.19882	8.93536	5.30138	1
2	3	7	1.5	4	4	10.6771	10.8925	1.40037	1
2	3	7	1.5	4	6	9.03174	9.39141	0.50013	1
2	3	7	1.5	4	8	9.03174	9.39141	0.40014	1
2	3	7	1.5	6	2	5.8775	7.35312	7.10177	1
2	3	7	1.5	6	4	8.75621	9.34982	3.80096	1
2	3	7	1.5	6	6	10.6771	10.8925	1.40037	1
2	3	7	1.5	6	8	10.4829	10.7235	1.10029	1
2	3	7	2	2	2	9.5721	10.0597	1.80047	1
2	3	7	2	2	4	10.6771	10.8925	1.0003	1
2	3	7	2	2	6	10.4829	10.7235	0.60017	1
2	3	7	2	2	8	9.03174	9.39141	0.50014	1
2	3	7	2	4	2	5.8775	7.35312	5.60134	1
2	3	7	2	4	4	9.5721	10.0597	1.80047	1
2	3	7	2	4	6	10.8825	11.0899	1.20031	1
2	3	7	2	4	8	10.6771	10.8925	1.0003	1
2	3	7	2	6	2	5.8775	7.35312	7.10177	1
2	3	7	2	6	4	8.19882	8.93536	3.90105	1
2	3	7	2	6	6	9.5721	10.0597	1.80047	1
2	3	7	2	6	8	10.5088	10.7916	1.40038	1
2	3	7	2.5	2	2	7.75963	8.70393	2.10037	1
2	3	7	2.5	2	4	9.5721	10.0597	1.4004	1
2	3	7	2.5	2	6	10.5088	10.7916	0.90026	1
2	3	7	2.5	2	8	10.5088	10.7916	0.90026	1
2	3	7	2.5	4	2	5.8775	7.35312	5.60134	1
2	3	7	2.5	4	4	7.75963	8.70393	2.10037	1
2	3	7	2.5	4	6	8.75621	9.34982	1.60037	1
2	3	7	2.5	4	8	9.5721	10.0597	1.4004	1
2	3	7	2.5	6	2	5.8775	7.35312	7.10177	1
2	3	7	2.5	6	4	5.8775	7.35312	4.20101	1
2	3	7	2.5	6	6	7.75963	8.70393	2.10037	1
2	3	7	2.5	6	8	8.19882	8.93536	1.80049	1
2	3	8	1	2	2	9.33149	9.64499	0.20003	1
2	3	8	1	2	4	0	0	0	0
2	3	8	1	2	6	0	0	0	0
2	3	8	1	2	8	0	0	0	0
2	3	8	1	4	2	9.29357	9.83326	5.10131	1
2	3	8	1	4	4	9.33149	9.64499	0.20003	1
2	3	8	1	4	6	0	0	0	0
2	3	8	1	4	8	0	0	0	0
2	3	8	1	6	2	6.34646	7.67912	7.00177	1
2	3	8	1	6	4	10.4759	10.7226	3.30088	1
2	3	8	1	6	6	9.33149	9.64499	0.20003	1
2	3	8	1	6	8	3.61812	4.46264	0	1
2	3	8	1.5	2	2	10.4759	10.7226	1.30035	1
2	3	8	1.5	2	4	7.63735	8.14453	0.10002	1
2	3	8	1.5	2	6	0	0	0	0
2	3	8	1.5	2	8	0	0	0	0
2	3	8	1.5	4	2	7.76869	8.5854	5.30138	1
2	3	8	1.5	4	4	10.4759	10.7226	1.30035	1
2	3	8	1.5	4	6	9.33149	9.64499	0.90023	1
2	3	8	1.5	4	8	7.63735	8.14453	0.40014	1
2	3	8	1.5	6	2	6.34646	7.67912	7.00177	1
2	3	8	1.5	6	4	9.29357	9.83326	3.70098	1
2	3	8	1.5	6	6	10.4759	10.7226	1.30035	1
2	3	8	1.5	6	8	9.33149	9.64499	1.00026	1
2	3	8	2	2	2	9.29357	9.83326	1.70045	1
2	3	8	2	2	4	10.4759	10.7226	0.90023	1
2	3	8	2	2	6	10.5554	10.7784	0.70019	1
2	3	8	2	2	8	9.33149	9.64499	0.50014	1
2	3	8	2	4	2	6.34646	7.67912	5.50134	1
2	3	8	2	4	4	9.29357	9.83326	1.70045	1
2	3	8	2	4	6	10.4494	10.727	1.20031	1
2	3	8	2	4	8	10.4759	10.7226	1.0003	1
2	3	8	2	6	2	6.34646	7.67912	7.00177	1
2	3	8	2	6	4	7.76869	8.5854	3.90105	1
2	3	8	2	6	6	9.29357	9.83326	1.70045	1
2	3	8	2	6	8	10.0809	10.4371	1.40038	1
2	3	8	2.5	2	2	6.99445	8.10507	2.00035	1
2	3	8	2.5	2	4	9.29357	9.83326	1.30033	1
2	3	8	2.5	2	6	10.0809	10.4371	1.00028	1
2	3	8	2.5	2	8	10.0809	10.4371	0.90026	1
2	3	8	2.5	4	2	6.34646	7.67912	5.50134	1
2	3	8	2.5	4	4	6.99445	8.10507	2.00035	1
2	3	8	2.5	4	6	8.25384	8.93796	1.60037	1
2	3	8	2.5	4	8	9.29357	9.83326	1.4004	1
2	3	8	2.5	6	2	6.34646	7.67912	7.00177	1
2	3	8	2.5	6	4	6.34646	7.67912	4.10101	1
2	3	8	2.5	6	6	6.99445	8.10507	2.00035	1
2	3	8	2.5	6	8	7.76869	8.5854	1.80049	1
2	3	9	1	2	2	8.1454	8.56464	0.60015	1
2	3	9	1	2	4	0	0	0	0
2	3	9	1	2	6	0	0	0	0
2	3	9	1	2	8	0	0	0	0
2	3	9	1	4	2	9.6231	10.0756	5.00127	1
2	3	9	1	4	4	8.1454	8.56464	0.60015	1
2	3	9	1	4	6	0	0	0	0
2	3	9	1	4	8	0	0	0	0
2	3	9	1	6	2	6.52566	7.74086	6.90164	1
2	3	9	1	6	4	10.1725	10.4663	3.30088	1
2	3	9	1	6	6	8.1454	8.56464	0.60015	1
2	3	9	1	6	8	4.90901	5.52503	0	1
2	3	9	1.5	2	2	10.1725	10.4663	1.30035	1
2	3	9	1.5	2	4	8.1454	8.56464	0.30007	1
2	3	9	1.5	2	6	0	0	0	0
2	3	9	1.5	2	8	0	0	0	0
2	3	9	1.5	4	2	7.10834	8.07293	5.30138	1
2	3	9	1.5	4	4	10.1725	10.4663	1.30035	1
2	3	9	1.5	4	6	9.47132	9.76233	1.00026	1
2	3	9	1.5	4	8	8.1454	8.56464	0.40014	1
2	3	9	1.5	6	2	6.52566	7.74086	6.90164	1
2	3	9	1.5	6	4	9.6231	10.0756	3.60094	1
2	3	9	1.5	6	6	10.1725	10.4663	1.30035	1
2	3	9	1.5	6	8	9.47132	9.76233	1.00026	1
2	3	9	2	2	2	9.6231	10.0756	1.60041	1
2	3	9	2	2	4	10.1725	10.4663	0.90023	1
2	3	9	2	2	6	10.2067	10.6547	0.70019	1
2	3	9	2	2	8	9.47132	9.76233	0.60016	1
2	3	9	2	4	2	6.52566	7.74086	5.40121	1
2	3	9	2	4	4	9.6231	10.0756	1.60041	1
2	3	9	2	4	6	10.0981	10.4327	1.30034	1
2	3	9	2	4	8	10.1725	10.4663	1.0003	1
2	3	9	2	6	2	6.52566	7.74086	6.90164	1
2	3	9	2	6	4	7.10834	8.07293	3.90105	1
2	3	9	2	6	6	9.6231	10.0756	1.60041	1
2	3	9	2	6	8	10.0001	10.3691	1.40038	1
2	3	9	2.5	2	2	6.52566	7.74086	2.00035	1
2	3	9	2.5	2	4	8.78826	9.42002	1.30033	1
2	3	9	2.5	2	6	10.0001	10.3691	1.00028	1
2	3	9	2.5	2	8	10.0001	10.3691	1.00028	1
2	3	9	2.5	4	2	6.52566	7.74086	5.40121	1
2	3	9	2.5	4	4	6.52566	7.74086	2.00035	1
2	3	9	2.5	4	6	7.83886	8.63037	1.7004	1
2	3	9	2.5	4	8	8.78826	9.42002	1.4004	1
2	3	9	2.5	6	2	6.52566	7.74086	6.90164	1
2	3	9	2.5	6	4	6.52566	7.74086	4.00088	1
2	3	9	2.5	6	6	6.52566	7.74086	2.00035	1
2	3	9	2.5	6	8	7.10834	8.07293	1.80049	1

## Sheet: Flight 3
FLIGHT Nr.	Encounter	Window size W	t_p [s]	D_LIM [m]	Vsc scale k_V	Distance with firm braking [m]	Distance with emergency braking [m]	DNT (maxT) [s]	Safe (0), Danger (1)
3	1	3	1	2	2	-25.5101	-20.4093	0	1
3	1	3	1	2	4	0	0	0	0
3	1	3	1	2	6	0	0	0	0
3	1	3	1	2	8	0	0	0	0
3	1	3	1	4	2	-0.643764	0.245218	0.10004	1
3	1	3	1	4	4	-25.5101	-20.4093	0	1
3	1	3	1	4	6	0	0	0	0
3	1	3	1	4	8	0	0	0	0
3	1	3	1	6	2	-3.51954	3.68971	0.99994	1
3	1	3	1	6	4	-0.849881	-0.699714	0.09999	1
3	1	3	1	6	6	-25.5101	-20.4093	0	1
3	1	3	1	6	8	0	0	0	0
3	1	3	1.5	2	2	-25.5101	-20.4093	0	1
3	1	3	1.5	2	4	0	0	0	0
3	1	3	1.5	2	6	0	0	0	0
3	1	3	1.5	2	8	0	0	0	0
3	1	3	1.5	4	2	-3.51954	3.68971	0.49999	1
3	1	3	1.5	4	4	-25.5101	-20.4093	0	1
3	1	3	1.5	4	6	0	0	0	0
3	1	3	1.5	4	8	0	0	0	0
3	1	3	1.5	6	2	1.29052	2.23173	1.09994	1
3	1	3	1.5	6	4	-0.643764	0.245218	0.09999	1
3	1	3	1.5	6	6	-25.5101	-20.4093	0	1
3	1	3	1.5	6	8	0	0	0	0
3	1	3	2	2	2	-0.643764	0.245218	0.09999	1
3	1	3	2	2	4	0	0	0	0
3	1	3	2	2	6	0	0	0	0
3	1	3	2	2	8	0	0	0	0
3	1	3	2	4	2	-3.51954	3.68971	0.49999	1
3	1	3	2	4	4	-0.643764	0.245218	0.09999	1
3	1	3	2	4	6	0	0	0	0
3	1	3	2	4	8	0	0	0	0
3	1	3	2	6	2	1.29052	2.23173	1.09994	1
3	1	3	2	6	4	-0.643764	0.245218	0.10004	1
3	1	3	2	6	6	-0.643764	0.245218	0.09999	1
3	1	3	2	6	8	-25.5101	-20.4093	0	1
3	1	3	2.5	2	2	-0.643764	0.245218	0.10004	1
3	1	3	2.5	2	4	0	0	0	0
3	1	3	2.5	2	6	0	0	0	0
3	1	3	2.5	2	8	0	0	0	0
3	1	3	2.5	4	2	-3.51954	3.68971	0.89995	1
3	1	3	2.5	4	4	-0.643764	0.245218	0.10004	1
3	1	3	2.5	4	6	-0.643764	0.245218	0	1
3	1	3	2.5	4	8	0	0	0	0
3	1	3	2.5	6	2	-0.625173	-0.271176	1.09994	1
3	1	3	2.5	6	4	-3.51954	3.68971	0.40001	1
3	1	3	2.5	6	6	-0.643764	0.245218	0.10004	1
3	1	3	2.5	6	8	-0.643764	0.245218	0	1
3	1	4	1	2	2	0	0	0	0
3	1	4	1	2	4	0	0	0	0
3	1	4	1	2	6	0	0	0	0
3	1	4	1	2	8	0	0	0	0
3	1	4	1	4	2	-0.0837948	0.81498	0.29997	1
3	1	4	1	4	4	0	0	0	0
3	1	4	1	4	6	0	0	0	0
3	1	4	1	4	8	0	0	0	0
3	1	4	1	6	2	2.63418	3.10813	0.89995	1
3	1	4	1	6	4	-25.5975	-20.4339	0	1
3	1	4	1	6	6	0	0	0	0
3	1	4	1	6	8	0	0	0	0
3	1	4	1.5	2	2	-25.5975	-20.4339	0	1
3	1	4	1.5	2	4	0	0	0	0
3	1	4	1.5	2	6	0	0	0	0
3	1	4	1.5	2	8	0	0	0	0
3	1	4	1.5	4	2	2.63418	3.10813	0.39995	1
3	1	4	1.5	4	4	-25.5975	-20.4339	0	1
3	1	4	1.5	4	6	0	0	0	0
3	1	4	1.5	4	8	0	0	0	0
3	1	4	1.5	6	2	2.63418	3.10813	0.89995	1
3	1	4	1.5	6	4	-0.0837948	0.81498	0	1
3	1	4	1.5	6	6	-25.5975	-20.4339	0	1
3	1	4	1.5	6	8	0	0	0	0
3	1	4	2	2	2	-25.5975	-20.4339	0	1
3	1	4	2	2	4	0	0	0	0
3	1	4	2	2	6	0	0	0	0
3	1	4	2	2	8	0	0	0	0
3	1	4	2	4	2	2.63418	3.10813	0.59997	1
3	1	4	2	4	4	-25.5975	-20.4339	0	1
3	1	4	2	4	6	0	0	0	0
3	1	4	2	4	8	0	0	0	0
3	1	4	2	6	2	-0.412947	-0.418174	0.89995	1
3	1	4	2	6	4	-0.0837948	0.81498	0.29997	1
3	1	4	2	6	6	-25.5975	-20.4339	0	1
3	1	4	2	6	8	0	0	0	0
3	1	4	2.5	2	2	-0.0837948	0.81498	0	1
3	1	4	2.5	2	4	0	0	0	0
3	1	4	2.5	2	6	0	0	0	0
3	1	4	2.5	2	8	0	0	0	0
3	1	4	2.5	4	2	2.63418	3.10813	0.59997	1
3	1	4	2.5	4	4	-0.0837948	0.81498	0	1
3	1	4	2.5	4	6	0	0	0	0
3	1	4	2.5	4	8	0	0	0	0
3	1	4	2.5	6	2	-0.412947	-0.418174	0.89995	1
3	1	4	2.5	6	4	2.63418	3.10813	0.29997	1
3	1	4	2.5	6	6	-0.0837948	0.81498	0	1
3	1	4	2.5	6	8	-25.5975	-20.4339	0	1
3	1	5	1	2	2	0	0	0	0
3	1	5	1	2	4	0	0	0	0
3	1	5	1	2	6	0	0	0	0
3	1	5	1	2	8	0	0	0	0
3	1	5	1	4	2	3.00296	3.40632	0.09997	1
3	1	5	1	4	4	0	0	0	0
3	1	5	1	4	6	0	0	0	0
3	1	5	1	4	8	0	0	0	0
3	1	5	1	6	2	-1.11671	1.6339	2.09986	1
3	1	5	1	6	4	0	0	0	0
3	1	5	1	6	6	0	0	0	0
3	1	5	1	6	8	0	0	0	0
3	1	5	1.5	2	2	0	0	0	0
3	1	5	1.5	2	4	0	0	0	0
3	1	5	1.5	2	6	0	0	0	0
3	1	5	1.5	2	8	0	0	0	0
3	1	5	1.5	4	2	-1.61838	2.07517	0.39995	1
3	1	5	1.5	4	4	0	0	0	0
3	1	5	1.5	4	6	0	0	0	0
3	1	5	1.5	4	8	0	0	0	0
3	1	5	1.5	6	2	-1.11671	1.6339	2.49985	1
3	1	5	1.5	6	4	3.00296	3.40632	0	1
3	1	5	1.5	6	6	0	0	0	0
3	1	5	1.5	6	8	0	0	0	0
3	1	5	2	2	2	0	0	0	0
3	1	5	2	2	4	0	0	0	0
3	1	5	2	2	6	0	0	0	0
3	1	5	2	2	8	0	0	0	0
3	1	5	2	4	2	-1.35389	1.85337	0.59994	1
3	1	5	2	4	4	0	0	0	0
3	1	5	2	4	6	0	0	0	0
3	1	5	2	4	8	0	0	0	0
3	1	5	2	6	2	-1.11671	1.6339	2.49985	1
3	1	5	2	6	4	3.00296	3.40632	0	1
3	1	5	2	6	6	0	0	0	0
3	1	5	2	6	8	0	0	0	0
3	1	5	2.5	2	2	3.00296	3.40632	0	1
3	1	5	2.5	2	4	0	0	0	0
3	1	5	2.5	2	6	0	0	0	0
3	1	5	2.5	2	8	0	0	0	0
3	1	5	2.5	4	2	-1.11671	1.6339	0.69998	1
3	1	5	2.5	4	4	3.00296	3.40632	0	1
3	1	5	2.5	4	6	0	0	0	0
3	1	5	2.5	4	8	0	0	0	0
3	1	5	2.5	6	2	-1.11671	1.6339	2.49985	1
3	1	5	2.5	6	4	3.00296	3.40632	0.29997	1
3	1	5	2.5	6	6	3.00296	3.40632	0	1
3	1	5	2.5	6	8	0	0	0	0
3	1	6	1	2	2	0	0	0	0
3	1	6	1	2	4	0	0	0	0
3	1	6	1	2	6	0	0	0	0
3	1	6	1	2	8	0	0	0	0
3	1	6	1	4	2	2.45663	2.9707	0.09998	1
3	1	6	1	4	4	0	0	0	0
3	1	6	1	4	6	0	0	0	0
3	1	6	1	4	8	0	0	0	0
3	1	6	1	6	2	-0.791929	1.10918	2.59984	1
3	1	6	1	6	4	0	0	0	0
3	1	6	1	6	6	0	0	0	0
3	1	6	1	6	8	0	0	0	0
3	1	6	1.5	2	2	0	0	0	0
3	1	6	1.5	2	4	0	0	0	0
3	1	6	1.5	2	6	0	0	0	0
3	1	6	1.5	2	8	0	0	0	0
3	1	6	1.5	4	2	-1.53409	2.03871	0.29997	1
3	1	6	1.5	4	4	0	0	0	0
3	1	6	1.5	4	6	0	0	0	0
3	1	6	1.5	4	8	0	0	0	0
3	1	6	1.5	6	2	-0.858356	1.07917	2.69984	1
3	1	6	1.5	6	4	0	0	0	0
3	1	6	1.5	6	6	0	0	0	0
3	1	6	1.5	6	8	0	0	0	0
3	1	6	2	2	2	0	0	0	0
3	1	6	2	2	4	0	0	0	0
3	1	6	2	2	6	0	0	0	0
3	1	6	2	2	8	0	0	0	0
3	1	6	2	4	2	-1.53409	2.03871	1.29989	1
3	1	6	2	4	4	0	0	0	0
3	1	6	2	4	6	0	0	0	0
3	1	6	2	4	8	0	0	0	0
3	1	6	2	6	2	-0.858356	1.07917	2.69984	1
3	1	6	2	6	4	2.45663	2.9707	0	1
3	1	6	2	6	6	0	0	0	0
3	1	6	2	6	8	0	0	0	0
3	1	6	2.5	2	2	0	0	0	0
3	1	6	2.5	2	4	0	0	0	0
3	1	6	2.5	2	6	0	0	0	0
3	1	6	2.5	2	8	0	0	0	0
3	1	6	2.5	4	2	-1.53409	2.03871	1.29989	1
3	1	6	2.5	4	4	0	0	0	0
3	1	6	2.5	4	6	0	0	0	0
3	1	6	2.5	4	8	0	0	0	0
3	1	6	2.5	6	2	-0.858356	1.07917	2.69984	1
3	1	6	2.5	6	4	1.49915	2.16058	0.1	1
3	1	6	2.5	6	6	0	0	0	0
3	1	6	2.5	6	8	0	0	0	0
3	1	7	1	2	2	0	0	0	0
3	1	7	1	2	4	0	0	0	0
3	1	7	1	2	6	0	0	0	0
3	1	7	1	2	8	0	0	0	0
3	1	7	1	4	2	-11.3568	10.2709	0	1
3	1	7	1	4	4	0	0	0	0
3	1	7	1	4	6	0	0	0	0
3	1	7	1	4	8	0	0	0	0
3	1	7	1	6	2	-0.767732	1.3499	2.59982	1
3	1	7	1	6	4	0	0	0	0
3	1	7	1	6	6	0	0	0	0
3	1	7	1	6	8	0	0	0	0
3	1	7	1.5	2	2	0	0	0	0
3	1	7	1.5	2	4	0	0	0	0
3	1	7	1.5	2	6	0	0	0	0
3	1	7	1.5	2	8	0	0	0	0
3	1	7	1.5	4	2	1.19392	1.89502	0.29997	1
3	1	7	1.5	4	4	0	0	0	0
3	1	7	1.5	4	6	0	0	0	0
3	1	7	1.5	4	8	0	0	0	0
3	1	7	1.5	6	2	-0.683236	-0.707902	2.69983	1
3	1	7	1.5	6	4	0	0	0	0
3	1	7	1.5	6	6	0	0	0	0
3	1	7	1.5	6	8	0	0	0	0
3	1	7	2	2	2	0	0	0	0
3	1	7	2	2	4	0	0	0	0
3	1	7	2	2	6	0	0	0	0
3	1	7	2	2	8	0	0	0	0
3	1	7	2	4	2	-0.767732	1.3499	1.3999	1
3	1	7	2	4	4	0	0	0	0
3	1	7	2	4	6	0	0	0	0
3	1	7	2	4	8	0	0	0	0
3	1	7	2	6	2	-0.608108	-0.680727	2.79983	1
3	1	7	2	6	4	2.18494	2.74237	0	1
3	1	7	2	6	6	0	0	0	0
3	1	7	2	6	8	0	0	0	0
3	1	7	2.5	2	2	0	0	0	0
3	1	7	2.5	2	4	0	0	0	0
3	1	7	2.5	2	6	0	0	0	0
3	1	7	2.5	2	8	0	0	0	0
3	1	7	2.5	4	2	-0.767732	1.3499	1.49991	1
3	1	7	2.5	4	4	0	0	0	0
3	1	7	2.5	4	6	0	0	0	0
3	1	7	2.5	4	8	0	0	0	0
3	1	7	2.5	6	2	-0.608108	-0.680727	2.79983	1
3	1	7	2.5	6	4	1.19392	1.89502	0.19999	1
3	1	7	2.5	6	6	0	0	0	0
3	1	7	2.5	6	8	0	0	0	0
3	1	8	1	2	2	0	0	0	0
3	1	8	1	2	4	0	0	0	0
3	1	8	1	2	6	0	0	0	0
3	1	8	1	2	8	0	0	0	0
3	1	8	1	4	2	3.31292	3.43781	0	1
3	1	8	1	4	4	0	0	0	0
3	1	8	1	4	6	0	0	0	0
3	1	8	1	4	8	0	0	0	0
3	1	8	1	6	2	-0.679509	1.01467	3.59979	1
3	1	8	1	6	4	0	0	0	0
3	1	8	1	6	6	0	0	0	0
3	1	8	1	6	8	0	0	0	0
3	1	8	1.5	2	2	0	0	0	0
3	1	8	1.5	2	4	0	0	0	0
3	1	8	1.5	2	6	0	0	0	0
3	1	8	1.5	2	8	0	0	0	0
3	1	8	1.5	4	2	0.62667	1.35798	0.79991	1
3	1	8	1.5	4	4	0	0	0	0
3	1	8	1.5	4	6	0	0	0	0
3	1	8	1.5	4	8	0	0	0	0
3	1	8	1.5	6	2	-0.495846	-0.459203	3.6998	1
3	1	8	1.5	6	4	0	0	0	0
3	1	8	1.5	6	6	0	0	0	0
3	1	8	1.5	6	8	0	0	0	0
3	1	8	2	2	2	0	0	0	0
3	1	8	2	2	4	0	0	0	0
3	1	8	2	2	6	0	0	0	0
3	1	8	2	2	8	0	0	0	0
3	1	8	2	4	2	-0.368343	0.889431	1.3999	1
3	1	8	2	4	4	0	0	0	0
3	1	8	2	4	6	0	0	0	0
3	1	8	2	4	8	0	0	0	0
3	1	8	2	6	2	-0.495846	-0.459203	4.49975	1
3	1	8	2	6	4	0	0	0	0
3	1	8	2	6	6	0	0	0	0
3	1	8	2	6	8	0	0	0	0
3	1	8	2.5	2	2	0	0	0	0
3	1	8	2.5	2	4	0	0	0	0
3	1	8	2.5	2	6	0	0	0	0
3	1	8	2.5	2	8	0	0	0	0
3	1	8	2.5	4	2	-0.368343	0.889431	1.59989	1
3	1	8	2.5	4	4	0	0	0	0
3	1	8	2.5	4	6	0	0	0	0
3	1	8	2.5	4	8	0	0	0	0
3	1	8	2.5	6	2	-0.495846	-0.459203	4.49975	1
3	1	8	2.5	6	4	1.05554	1.83319	0	1
3	1	8	2.5	6	6	0	0	0	0
3	1	8	2.5	6	8	0	0	0	0
3	1	9	1	2	2	0	0	0	0
3	1	9	1	2	4	0	0	0	0
3	1	9	1	2	6	0	0	0	0
3	1	9	1	2	8	0	0	0	0
3	1	9	1	4	2	9.48575	8.79991	0	1
3	1	9	1	4	4	0	0	0	0
3	1	9	1	4	6	0	0	0	0
3	1	9	1	4	8	0	0	0	0
3	1	9	1	6	2	-0.589855	-0.705419	4.39974	1
3	1	9	1	6	4	0	0	0	0
3	1	9	1	6	6	0	0	0	0
3	1	9	1	6	8	0	0	0	0
3	1	9	1.5	2	2	0	0	0	0
3	1	9	1.5	2	4	0	0	0	0
3	1	9	1.5	2	6	0	0	0	0
3	1	9	1.5	2	8	0	0	0	0
3	1	9	1.5	4	2	-0.651111	1.24232	1.29992	1
3	1	9	1.5	4	4	0	0	0	0
3	1	9	1.5	4	6	0	0	0	0
3	1	9	1.5	4	8	0	0	0	0
3	1	9	1.5	6	2	-0.589855	-0.705419	4.39974	1
3	1	9	1.5	6	4	0	0	0	0
3	1	9	1.5	6	6	0	0	0	0
3	1	9	1.5	6	8	0	0	0	0
3	1	9	2	2	2	0	0	0	0
3	1	9	2	2	4	0	0	0	0
3	1	9	2	2	6	0	0	0	0
3	1	9	2	2	8	0	0	0	0
3	1	9	2	4	2	-0.250106	0.595685	1.49991	1
3	1	9	2	4	4	0	0	0	0
3	1	9	2	4	6	0	0	0	0
3	1	9	2	4	8	0	0	0	0
3	1	9	2	6	2	-0.589855	-0.705419	4.39974	1
3	1	9	2	6	4	0	0	0	0
3	1	9	2	6	6	0	0	0	0
3	1	9	2	6	8	0	0	0	0
3	1	9	2.5	2	2	0	0	0	0
3	1	9	2.5	2	4	0	0	0	0
3	1	9	2.5	2	6	0	0	0	0
3	1	9	2.5	2	8	0	0	0	0
3	1	9	2.5	4	2	-0.250106	0.595685	1.49991	1
3	1	9	2.5	4	4	0	0	0	0
3	1	9	2.5	4	6	0	0	0	0
3	1	9	2.5	4	8	0	0	0	0
3	1	9	2.5	6	2	-0.589855	-0.705419	4.39974	1
3	1	9	2.5	6	4	2.23734	2.733	0	1
3	1	9	2.5	6	6	0	0	0	0
3	1	9	2.5	6	8	0	0	0	0
3	2	3	1	2	2	-3.29013	3.61738	0.49995	1
3	2	3	1	2	4	0	0	0	0
3	2	3	1	2	6	0	0	0	0
3	2	3	1	2	8	0	0	0	0
3	2	3	1	4	2	4.24867	5.34772	1.10007	1
3	2	3	1	4	4	-3.29013	3.61738	0.49995	1
3	2	3	1	4	6	-2.73644	-1.33753	0	1
3	2	3	1	4	8	-2.73644	-1.33753	0	1
3	2	3	1	6	2	3.41611	4.73313	1.80003	1
3	2	3	1	6	4	3.80458	4.5113	0.9001	1
3	2	3	1	6	6	-3.29013	3.61738	0.49995	1
3	2	3	1	6	8	-3.31777	3.64274	0	1
3	2	3	1.5	2	2	-3.25401	3.55892	0.9001	1
3	2	3	1.5	2	4	-3.29013	3.61738	0.29998	1
3	2	3	1.5	2	6	0	0	0	0
3	2	3	1.5	2	8	0	0	0	0
3	2	3	1.5	4	2	4.24867	5.34772	1.10007	1
3	2	3	1.5	4	4	-3.25401	3.55892	0.9001	1
3	2	3	1.5	4	6	-3.29013	3.61738	0.49995	1
3	2	3	1.5	4	8	-3.29013	3.61738	0.29998	1
3	2	3	1.5	6	2	3.41611	4.73313	2.19999	1
3	2	3	1.5	6	4	4.24867	5.34772	1.10007	1
3	2	3	1.5	6	6	-3.25401	3.55892	0.9001	1
3	2	3	1.5	6	8	-3.25401	3.55892	0.9001	1
3	2	3	2	2	2	1.59153	2.64799	1.00009	1
3	2	3	2	2	4	-3.25401	3.55892	0.39999	1
3	2	3	2	2	6	-3.29013	3.61738	0.29998	1
3	2	3	2	2	8	-3.29013	3.61738	0.29998	1
3	2	3	2	4	2	3.41611	4.73313	1.10007	1
3	2	3	2	4	4	1.59153	2.64799	1.00009	1
3	2	3	2	4	6	-3.25401	3.55892	0.7001	1
3	2	3	2	4	8	-3.25401	3.55892	0.39999	1
3	2	3	2	6	2	2.92119	4.50704	2.30001	1
3	2	3	2	6	4	4.24867	5.34772	1.10007	1
3	2	3	2	6	6	1.59153	2.64799	1.00009	1
3	2	3	2	6	8	-3.25401	3.55892	0.9001	1
3	2	3	2.5	2	2	3.41611	4.73313	1.10007	1
3	2	3	2.5	2	4	1.59153	2.64799	0.39999	1
3	2	3	2.5	2	6	-3.25401	3.55892	0.39999	1
3	2	3	2.5	2	8	-3.25401	3.55892	0.39999	1
3	2	3	2.5	4	2	2.92119	4.50704	2.30001	1
3	2	3	2.5	4	4	3.41611	4.73313	1.10007	1
3	2	3	2.5	4	6	1.59153	2.64799	0.7001	1
3	2	3	2.5	4	8	1.59153	2.64799	0.39999	1
3	2	3	2.5	6	2	2.92119	4.50704	2.30001	1
3	2	3	2.5	6	4	3.41611	4.73313	1.10007	1
3	2	3	2.5	6	6	3.41611	4.73313	1.10007	1
3	2	3	2.5	6	8	1.59153	2.64799	0.9001	1
3	2	4	1	2	2	5.42977	5.76267	0.80009	1
3	2	4	1	2	4	0	0	0	0
3	2	4	1	2	6	0	0	0	0
3	2	4	1	2	8	0	0	0	0
3	2	4	1	4	2	2.69744	3.82017	2.49981	1
3	2	4	1	4	4	5.42977	5.76267	0.80009	1
3	2	4	1	4	6	5.4791	5.81774	0	1
3	2	4	1	4	8	0	0	0	0
3	2	4	1	6	2	4.54497	5.40684	3.59977	1
3	2	4	1	6	4	3.05738	3.96488	1.09999	1
3	2	4	1	6	6	5.42977	5.76267	0.80009	1
3	2	4	1	6	8	5.4791	5.81774	0	1
3	2	4	1.5	2	2	5.38736	5.72543	0.9001	1
3	2	4	1.5	2	4	5.4791	5.81774	0.39995	1
3	2	4	1.5	2	6	5.4791	5.81774	0	1
3	2	4	1.5	2	8	0	0	0	0
3	2	4	1.5	4	2	4.54497	5.40684	2.59983	1
3	2	4	1.5	4	4	5.38736	5.72543	0.9001	1
3	2	4	1.5	4	6	5.42977	5.76267	0.49995	1
3	2	4	1.5	4	8	5.4791	5.81774	0.39995	1
3	2	4	1.5	6	2	3.4253	4.81991	4.09975	1
3	2	4	1.5	6	4	2.69744	3.82017	1.29996	1
3	2	4	1.5	6	6	5.38736	5.72543	1.09999	1
3	2	4	1.5	6	8	5.42977	5.76267	0.99998	1
3	2	4	2	2	2	2.69744	3.82017	0.9001	1
3	2	4	2	2	4	5.38736	5.72543	0.7001	1
3	2	4	2	2	6	5.42977	5.76267	0.29998	1
3	2	4	2	2	8	5.4791	5.81774	0.19998	1
3	2	4	2	4	2	3.4253	4.81991	3.09981	1
3	2	4	2	4	4	2.69744	3.82017	0.9001	1
3	2	4	2	4	6	4.73682	5.22402	0.7001	1
3	2	4	2	4	8	5.38736	5.72543	0.7001	1
3	2	4	2	6	2	2.31166	4.00098	4.39972	1
3	2	4	2	6	4	4.54497	5.40684	1.99992	1
3	2	4	2	6	6	2.69744	3.82017	1.09999	1
3	2	4	2	6	8	4.73682	5.22402	1.09999	1
3	2	4	2.5	2	2	4.54497	5.40684	1.80003	1
3	2	4	2.5	2	4	2.69744	3.82017	0.7001	1
3	2	4	2.5	2	6	2.69744	3.82017	0.39999	1
3	2	4	2.5	2	8	5.74512	6.07379	0.39999	1
3	2	4	2.5	4	2	2.31166	4.00098	3.39978	1
3	2	4	2.5	4	4	4.54497	5.40684	1.80003	1
3	2	4	2.5	4	6	2.69744	3.82017	0.7001	1
3	2	4	2.5	4	8	2.69744	3.82017	0.7001	1
3	2	4	2.5	6	2	2.31166	4.00098	4.39972	1
3	2	4	2.5	6	4	3.4253	4.81991	2.4999	1
3	2	4	2.5	6	6	4.54497	5.40684	1.99992	1
3	2	4	2.5	6	8	4.54497	5.40684	1.09999	1
3	2	5	1	2	2	5.72809	6.02451	0.70009	1
3	2	5	1	2	4	0	0	0	0
3	2	5	1	2	6	0	0	0	0
3	2	5	1	2	8	0	0	0	0
3	2	5	1	4	2	3.39338	4.13168	2.59981	1
3	2	5	1	4	4	5.72809	6.02451	0.70009	1
3	2	5	1	4	6	0	0	0	0
3	2	5	1	4	8	0	0	0	0
3	2	5	1	6	2	4.52944	5.35118	4.29972	1
3	2	5	1	6	4	4.79645	5.22993	1.09999	1
3	2	5	1	6	6	5.72809	6.02451	0.70009	1
3	2	5	1	6	8	5.36706	5.67351	0.19997	1
3	2	5	1.5	2	2	4.79645	5.22993	0.99998	1
3	2	5	1.5	2	4	5.72809	6.02451	0.39995	1
3	2	5	1.5	2	6	0	0	0	0
3	2	5	1.5	2	8	0	0	0	0
3	2	5	1.5	4	2	4.52944	5.35118	3.09979	1
3	2	5	1.5	4	4	4.79645	5.22993	0.99998	1
3	2	5	1.5	4	6	5.72809	6.02451	0.70009	1
3	2	5	1.5	4	8	5.72809	6.02451	0.39995	1
3	2	5	1.5	6	2	2.80309	4.23533	4.39974	1
3	2	5	1.5	6	4	2.09808	3.33833	1.8999	1
3	2	5	1.5	6	6	4.79645	5.22993	1.09999	1
3	2	5	1.5	6	8	5.67925	5.97005	0.99998	1
3	2	5	2	2	2	2.09808	3.33833	1.09997	1
3	2	5	2	2	4	5.67925	5.97005	0.60009	1
3	2	5	2	2	6	5.72809	6.02451	0.19998	1
3	2	5	2	2	8	5.72809	6.02451	0.19998	1
3	2	5	2	4	2	2.80309	4.23533	3.19981	1
3	2	5	2	4	4	2.09808	3.33833	1.09997	1
3	2	5	2	4	6	4.49163	5.04194	1.00009	1
3	2	5	2	4	8	5.87869	6.13385	0.60009	1
3	2	5	2	6	2	2.80309	4.23533	4.59972	1
3	2	5	2	6	4	4.52944	5.35118	2.39988	1
3	2	5	2	6	6	2.09808	3.33833	1.19998	1
3	2	5	2	6	8	4.49163	5.04194	1.19998	1
3	2	5	2.5	2	2	4.52944	5.35118	2.29987	1
3	2	5	2.5	2	4	2.09808	3.33833	0.80009	1
3	2	5	2.5	2	6	4.49163	5.04194	0.29998	1
3	2	5	2.5	2	8	5.87869	6.13385	0.29998	1
3	2	5	2.5	4	2	2.80309	4.23533	3.39979	1
3	2	5	2.5	4	4	4.52944	5.35118	2.29987	1
3	2	5	2.5	4	6	2.5599	3.7391	1.00009	1
3	2	5	2.5	4	8	2.09808	3.33833	0.80009	1
3	2	5	2.5	6	2	2.80309	4.23533	4.59972	1
3	2	5	2.5	6	4	2.80309	4.23533	2.4999	1
3	2	5	2.5	6	6	4.52944	5.35118	2.39988	1
3	2	5	2.5	6	8	4.52944	5.35118	2.39988	1
3	2	6	1	2	2	5.66256	5.89049	0.89998	1
3	2	6	1	2	4	0	0	0	0
3	2	6	1	2	6	0	0	0	0
3	2	6	1	2	8	0	0	0	0
3	2	6	1	4	2	4.24452	4.81699	2.59728	1
3	2	6	1	4	4	5.66256	5.89049	0.89998	1
3	2	6	1	4	6	0	0	0	0
3	2	6	1	4	8	0	0	0	0
3	2	6	1	6	2	3.96279	4.89533	3.89972	1
3	2	6	1	6	4	5.22002	5.58079	1.69991	1
3	2	6	1	6	6	5.66256	5.89049	0.89998	1
3	2	6	1	6	8	3.97414	4.2758	0.10006	1
3	2	6	1.5	2	2	5.22002	5.58079	1.59993	1
3	2	6	1.5	2	4	5.66256	5.89049	0.50009	1
3	2	6	1.5	2	6	0	0	0	0
3	2	6	1.5	2	8	0	0	0	0
3	2	6	1.5	4	2	2.91442	3.96028	3.09979	1
3	2	6	1.5	4	4	5.22002	5.58079	1.59993	1
3	2	6	1.5	4	6	5.66256	5.89049	0.70009	1
3	2	6	1.5	4	8	5.66256	5.89049	0.50009	1
3	2	6	1.5	6	2	2.61136	4.21818	4.09969	1
3	2	6	1.5	6	4	4.24452	4.81699	1.89736	1
3	2	6	1.5	6	6	5.22002	5.58079	1.59993	1
3	2	6	1.5	6	8	5.66256	5.89049	0.89998	1
3	2	6	2	2	2	4.24452	4.81699	1.79738	1
3	2	6	2	2	4	5.87201	6.15846	0.80009	1
3	2	6	2	2	6	5.66256	5.89049	0.19998	1
3	2	6	2	2	8	5.66256	5.89049	0.19998	1
3	2	6	2	4	2	3.42557	4.81723	3.2998	1
3	2	6	2	4	4	4.24452	4.81699	1.79738	1
3	2	6	2	4	6	4.39943	4.88951	1.50005	1
3	2	6	2	4	8	5.87201	6.15846	0.80009	1
3	2	6	2	6	2	2.61136	4.21818	4.09969	1
3	2	6	2	6	4	3.96279	4.89533	2.49986	1
3	2	6	2	6	6	4.24452	4.81699	1.79738	1
3	2	6	2	6	8	4.39943	4.88951	1.69994	1
3	2	6	2.5	2	2	3.96279	4.89533	2.39988	1
3	2	6	2.5	2	4	4.24452	4.81699	1.39749	1
3	2	6	2.5	2	6	5.22002	5.58079	0.49998	1
3	2	6	2.5	2	8	5.66256	5.89049	0.19998	1
3	2	6	2.5	4	2	2.61136	4.21818	3.39975	1
3	2	6	2.5	4	4	3.96279	4.89533	2.39988	1
3	2	6	2.5	4	6	2.91442	3.96028	1.59749	1
3	2	6	2.5	4	8	4.24452	4.81699	1.39749	1
3	2	6	2.5	6	2	2.61136	4.21818	4.09969	1
3	2	6	2.5	6	4	2.61136	4.21818	2.69983	1
3	2	6	2.5	6	6	3.96279	4.89533	2.39988	1
3	2	6	2.5	6	8	3.96279	4.89533	2.39988	1
3	2	7	1	2	2	5.75295	5.92759	0.89998	1
3	2	7	1	2	4	0	0	0	0
3	2	7	1	2	6	0	0	0	0
3	2	7	1	2	8	0	0	0	0
3	2	7	1	4	2	3.37923	4.09148	2.69728	1
3	2	7	1	4	4	5.75295	5.92759	0.89998	1
3	2	7	1	4	6	1.37912	1.93621	0	1
3	2	7	1	4	8	0	0	0	0
3	2	7	1	6	2	3.57048	4.73928	3.89972	1
3	2	7	1	6	4	4.81406	5.23449	1.69991	1
3	2	7	1	6	6	5.75295	5.92759	0.89998	1
3	2	7	1	6	8	4.08441	4.36917	0.50003	1
3	2	7	1.5	2	2	4.81406	5.23449	1.59993	1
3	2	7	1.5	2	4	5.37817	5.55274	0.30011	1
3	2	7	1.5	2	6	0	0	0	0
3	2	7	1.5	2	8	0	0	0	0
3	2	7	1.5	4	2	2.7597	3.78948	3.19979	1
3	2	7	1.5	4	4	4.81406	5.23449	1.59993	1
3	2	7	1.5	4	6	5.75295	5.92759	0.70009	1
3	2	7	1.5	4	8	5.37817	5.55274	0.30011	1
3	2	7	1.5	6	2	2.96412	4.41561	3.99974	1
3	2	7	1.5	6	4	2.1339	3.10334	2.09986	1
3	2	7	1.5	6	6	4.81406	5.23449	1.59993	1
3	2	7	1.5	6	8	5.72573	5.89716	0.99998	1
3	2	7	2	2	2	1.93923	2.96409	1.99992	1
3	2	7	2	2	4	4.91372	5.25368	1.10007	1
3	2	7	2	2	6	5.75295	5.92759	0.19998	1
3	2	7	2	2	8	5.37817	5.55274	0	1
3	2	7	2	4	2	2.96412	4.41561	3.3998	1
3	2	7	2	4	4	1.93923	2.96409	1.99992	1
3	2	7	2	4	6	4.81406	5.23449	1.40004	1
3	2	7	2	4	8	4.91372	5.25368	1.10007	1
3	2	7	2	6	2	2.96412	4.41561	3.99974	1
3	2	7	2	6	4	2.7597	3.78948	2.49985	1
3	2	7	2	6	6	1.93923	2.96409	1.99992	1
3	2	7	2	6	8	4.24045	4.73489	1.69994	1
3	2	7	2.5	2	2	3.57048	4.73928	2.39988	1
3	2	7	2.5	2	4	3.37923	4.09148	1.39749	1
3	2	7	2.5	2	6	5.33064	5.74976	0.19998	1
3	2	7	2.5	2	8	5.75295	5.92759	0.19998	1
3	2	7	2.5	4	2	2.96412	4.41561	3.3998	1
3	2	7	2.5	4	4	3.57048	4.73928	2.39988	1
3	2	7	2.5	4	6	2.7597	3.78948	2.1	1
3	2	7	2.5	4	8	3.37923	4.09148	1.39749	1
3	2	7	2.5	6	2	2.96412	4.41561	3.99974	1
3	2	7	2.5	6	4	2.96412	4.41561	2.69986	1
3	2	7	2.5	6	6	3.57048	4.73928	2.39988	1
3	2	7	2.5	6	8	3.57048	4.73928	2.39988	1
3	2	8	1	2	2	5.95512	6.11093	0.89998	1
3	2	8	1	2	4	0	0	0	0
3	2	8	1	2	6	0	0	0	0
3	2	8	1	2	8	0	0	0	0
3	2	8	1	4	2	2.1306	3.12468	2.89979	1
3	2	8	1	4	4	5.95512	6.11093	0.89998	1
3	2	8	1	4	6	1.89438	2.3685	0	1
3	2	8	1	4	8	0	0	0	0
3	2	8	1	6	2	3.06885	4.35954	3.89972	1
3	2	8	1	6	4	4.58367	5.02824	1.89991	1
3	2	8	1	6	6	5.95512	6.11093	0.89998	1
3	2	8	1	6	8	4.28197	4.53694	0.50003	1
3	2	8	1.5	2	2	4.63368	5.01168	1.59994	1
3	2	8	1.5	2	4	5.5811	5.73767	0.50011	1
3	2	8	1.5	2	6	0	0	0	0
3	2	8	1.5	2	8	0	0	0	0
3	2	8	1.5	4	2	2.69219	3.76078	3.29978	1
3	2	8	1.5	4	4	4.63368	5.01168	1.59994	1
3	2	8	1.5	4	6	5.95512	6.11093	0.79997	1
3	2	8	1.5	4	8	5.5811	5.73767	0.50011	1
3	2	8	1.5	6	2	3.06885	4.35954	3.89972	1
3	2	8	1.5	6	4	2.1306	3.12468	2.49981	1
3	2	8	1.5	6	6	4.63368	5.01168	1.59994	1
3	2	8	1.5	6	8	5.74983	5.91446	1.09996	1
3	2	8	2	2	2	2.1306	3.12468	1.99988	1
3	2	8	2	2	4	5.06944	5.46504	1.20006	1
3	2	8	2	2	6	5.95512	6.11093	0.19998	1
3	2	8	2	2	8	5.5811	5.73767	0	1
3	2	8	2	4	2	3.06885	4.35954	3.39977	1
3	2	8	2	4	4	2.1306	3.12468	1.99988	1
3	2	8	2	4	6	4.58367	5.02824	1.49992	1
3	2	8	2	4	8	5.06944	5.46504	1.20006	1
3	2	8	2	6	2	3.06885	4.35954	3.89972	1
3	2	8	2	6	4	2.69219	3.76078	2.8998	1
3	2	8	2	6	6	2.1306	3.12468	1.99988	1
3	2	8	2	6	8	4.58367	5.02824	1.69991	1
3	2	8	2.5	2	2	3.06885	4.35954	2.49986	1
3	2	8	2.5	2	4	2.1306	3.12468	1.70001	1
3	2	8	2.5	2	6	5.06944	5.46504	0.19998	1
3	2	8	2.5	2	8	5.5811	5.73767	0	1
3	2	8	2.5	4	2	3.06885	4.35954	3.39977	1
3	2	8	2.5	4	4	3.06885	4.35954	2.49986	1
3	2	8	2.5	4	6	2.50677	3.55322	2.0999	1
3	2	8	2.5	4	8	2.1306	3.12468	1.70001	1
3	2	8	2.5	6	2	3.06885	4.35954	3.89972	1
3	2	8	2.5	6	4	3.06885	4.35954	2.99979	1
3	2	8	2.5	6	6	3.06885	4.35954	2.49986	1
3	2	8	2.5	6	8	3.06885	4.35954	2.49986	1
3	2	9	1	2	2	5.92062	6.07828	0.99996	1
3	2	9	1	2	4	0	0	0	0
3	2	9	1	2	6	0	0	0	0
3	2	9	1	2	8	0	0	0	0
3	2	9	1	4	2	2.17129	3.10406	2.89979	1
3	2	9	1	4	4	5.92062	6.07828	0.99996	1
3	2	9	1	4	6	3.10069	3.42202	0.10006	1
3	2	9	1	4	8	0	0	0	0
3	2	9	1	6	2	2.34782	3.52526	3.79973	1
3	2	9	1	6	4	4.46874	4.86076	2.19987	1
3	2	9	1	6	6	5.92062	6.07828	0.99996	1
3	2	9	1	6	8	4.46183	4.68959	0.60001	1
3	2	9	1.5	2	2	4.46874	4.86076	1.59994	1
3	2	9	1.5	2	4	5.47175	5.64677	0.50011	1
3	2	9	1.5	2	6	0	0	0	0
3	2	9	1.5	2	8	0	0	0	0
3	2	9	1.5	4	2	2.34782	3.52526	3.29978	1
3	2	9	1.5	4	4	4.46874	4.86076	1.59994	1
3	2	9	1.5	4	6	5.92062	6.07828	0.89998	1
3	2	9	1.5	4	8	5.47175	5.64677	0.50011	1
3	2	9	1.5	6	2	2.34782	3.52526	3.79973	1
3	2	9	1.5	6	4	2.17129	3.10406	2.59981	1
3	2	9	1.5	6	6	4.46874	4.86076	1.69992	1
3	2	9	1.5	6	8	5.60206	5.77845	1.19994	1
3	2	9	2	2	2	2.17129	3.10406	1.99988	1
3	2	9	2	2	4	4.79419	5.24216	1.20006	1
3	2	9	2	2	6	5.92062	6.07828	0.19998	1
3	2	9	2	2	8	0	0	0	0
3	2	9	2	4	2	2.34782	3.52526	3.29978	1
3	2	9	2	4	4	2.17129	3.10406	1.99988	1
3	2	9	2	4	6	3.95606	4.49537	1.59993	1
3	2	9	2	4	8	4.79419	5.24216	1.20006	1
3	2	9	2	6	2	2.34782	3.52526	3.79973	1
3	2	9	2	6	4	2.34782	3.52526	2.9998	1
3	2	9	2	6	6	2.17129	3.10406	2.09986	1
3	2	9	2	6	8	2.76948	3.61505	1.99734	1
3	2	9	2.5	2	2	2.34782	3.52526	2.39987	1
3	2	9	2.5	2	4	2.17129	3.10406	1.70001	1
3	2	9	2.5	2	6	5.31392	5.68855	0.19998	1
3	2	9	2.5	2	8	0	0	0	0
3	2	9	2.5	4	2	2.34782	3.52526	3.29978	1
3	2	9	2.5	4	4	2.34782	3.52526	2.39987	1
3	2	9	2.5	4	6	2.44085	3.55518	2.19991	1
3	2	9	2.5	4	8	2.14897	3.13282	1.80003	1
3	2	9	2.5	6	2	2.34782	3.52526	3.79973	1
3	2	9	2.5	6	4	2.34782	3.52526	2.9998	1
3	2	9	2.5	6	6	2.34782	3.52526	2.49985	1
3	2	9	2.5	6	8	2.34782	3.52526	2.49985	1
3	3	3	1	2	2	4.74292	5.37449	0.39995	1
3	3	3	1	2	4	5.25773	5.8026	0.09998	1
3	3	3	1	2	6	0	0	0	0
3	3	3	1	2	8	0	0	0	0
3	3	3	1	4	2	5.55745	6.89791	1.49991	1
3	3	3	1	4	4	4.74292	5.37449	0.39995	1
3	3	3	1	4	6	4.66568	5.22254	0.29996	1
3	3	3	1	4	8	5.25773	5.8026	0.09998	1
3	3	3	1	6	2	7.1124	8.32488	1.99987	1
3	3	3	1	6	4	5.80465	6.69878	1.19992	1
3	3	3	1	6	6	4.74292	5.37449	0.39995	1
3	3	3	1	6	8	4.66568	5.22254	0.29996	1
3	3	3	1.5	2	2	5.55745	6.89791	1.19992	1
3	3	3	1.5	2	4	4.74292	5.37449	0.39995	1
3	3	3	1.5	2	6	4.66568	5.22254	0	1
3	3	3	1.5	2	8	4.87598	5.40898	0	1
3	3	3	1.5	4	2	8.29925	9.29405	1.89986	1
3	3	3	1.5	4	4	5.55745	6.89791	1.19992	1
3	3	3	1.5	4	6	4.74292	5.37449	0.39995	1
3	3	3	1.5	4	8	4.74292	5.37449	0.39995	1
3	3	3	1.5	6	2	8.14509	9.40289	2.19984	1
3	3	3	1.5	6	4	5.55745	6.89791	1.19992	1
3	3	3	1.5	6	6	5.55745	6.89791	1.19992	1
3	3	3	1.5	6	8	-2.39741	1.64642	0.79994	1
3	3	3	2	2	2	5.59009	6.80784	1.19992	1
3	3	3	2	2	4	5.55745	6.89791	0.49995	1
3	3	3	2	2	6	5.80465	6.69878	0.09999	1
3	3	3	2	2	8	5.80465	6.69878	0	1
3	3	3	2	4	2	8.14509	9.40289	2.19984	1
3	3	3	2	4	4	5.59009	6.80784	1.19992	1
3	3	3	2	4	6	5.55745	6.89791	0.79994	1
3	3	3	2	4	8	5.55745	6.89791	0.49995	1
3	3	3	2	6	2	8.14509	9.40289	2.19984	1
3	3	3	2	6	4	7.1124	8.32488	1.99987	1
3	3	3	2	6	6	5.59009	6.80784	1.19992	1
3	3	3	2	6	8	5.55745	6.89791	0.79994	1
3	3	3	2.5	2	2	7.05471	8.16829	1.19992	1
3	3	3	2.5	2	4	7.23008	8.38726	0.49995	1
3	3	3	2.5	2	6	5.59009	6.80784	0.1	1
3	3	3	2.5	2	8	5.59009	6.80784	0.1	1
3	3	3	2.5	4	2	8.14509	9.40289	2.19984	1
3	3	3	2.5	4	4	7.05471	8.16829	1.19992	1
3	3	3	2.5	4	6	7.1124	8.32488	0.79994	1
3	3	3	2.5	4	8	7.23008	8.38726	0.79994	1
3	3	3	2.5	6	2	8.14509	9.40289	2.19984	1
3	3	3	2.5	6	4	8.14509	9.40289	2.19984	1
3	3	3	2.5	6	6	7.05471	8.16829	1.19992	1
3	3	3	2.5	6	8	7.05471	8.16829	0.79994	1
3	3	4	1	2	2	6.27553	6.87396	0.59994	1
3	3	4	1	2	4	10.6443	10.6548	0.09998	1
3	3	4	1	2	6	0	0	0	0
3	3	4	1	2	8	0	0	0	0
3	3	4	1	4	2	5.28366	6.53588	1.49991	1
3	3	4	1	4	4	6.27553	6.87396	0.59994	1
3	3	4	1	4	6	10.3904	10.4055	0.29996	1
3	3	4	1	4	8	10.6443	10.6548	0.09998	1
3	3	4	1	6	2	7.16098	8.29334	1.99987	1
3	3	4	1	6	4	6.0794	7.06136	1.29994	1
3	3	4	1	6	6	6.27553	6.87396	0.59994	1
3	3	4	1	6	8	10.3904	10.4055	0.29996	1
3	3	4	1.5	2	2	5.88169	6.88191	1.39991	1
3	3	4	1.5	2	4	3.87359	4.43491	0.69988	1
3	3	4	1.5	2	6	10.3904	10.4055	0.09999	1
3	3	4	1.5	2	8	0	0	0	0
3	3	4	1.5	4	2	7.5178	8.54171	1.89986	1
3	3	4	1.5	4	4	5.88169	6.88191	1.39991	1
3	3	4	1.5	4	6	1.75133	3.28644	0.79993	1
3	3	4	1.5	4	8	3.87359	4.43491	0.69988	1
3	3	4	1.5	6	2	7.38424	8.47535	2.09986	1
3	3	4	1.5	6	4	5.28366	6.53588	1.49991	1
3	3	4	1.5	6	6	5.88169	6.88191	1.39991	1
3	3	4	1.5	6	8	1.75133	3.28644	1.09992	1
3	3	4	2	2	2	5.98462	7.10841	1.59991	1
3	3	4	2	2	4	5.88169	6.88191	1.39991	1
3	3	4	2	2	6	5.88169	6.88191	0.39992	1
3	3	4	2	2	8	6.0794	7.06136	0.19993	1
3	3	4	2	4	2	7.38424	8.47535	2.09986	1
3	3	4	2	4	4	5.98462	7.10841	1.59991	1
3	3	4	2	4	6	5.28366	6.53588	1.49991	1
3	3	4	2	4	8	5.88169	6.88191	1.39991	1
3	3	4	2	6	2	7.38424	8.47535	2.09986	1
3	3	4	2	6	4	7.16098	8.29334	1.99987	1
3	3	4	2	6	6	5.98462	7.10841	1.59991	1
3	3	4	2	6	8	5.28366	6.53588	1.49991	1
3	3	4	2.5	2	2	7.16098	8.29334	1.99987	1
3	3	4	2.5	2	4	7.50502	8.59044	1.79988	1
3	3	4	2.5	2	6	5.98462	7.10841	0.39999	1
3	3	4	2.5	2	8	5.98462	7.10841	0.39999	1
3	3	4	2.5	4	2	7.38424	8.47535	2.09986	1
3	3	4	2.5	4	4	7.16098	8.29334	1.99987	1
3	3	4	2.5	4	6	7.5178	8.54171	1.89986	1
3	3	4	2.5	4	8	7.50502	8.59044	1.79988	1
3	3	4	2.5	6	2	7.38424	8.47535	2.09986	1
3	3	4	2.5	6	4	7.38424	8.47535	2.09986	1
3	3	4	2.5	6	6	7.16098	8.29334	1.99987	1
3	3	4	2.5	6	8	7.16098	8.29334	1.99987	1
3	3	5	1	2	2	4.92841	5.67237	0.89993	1
3	3	5	1	2	4	8.18795	8.54864	0.19997	1
3	3	5	1	2	6	0	0	0	0
3	3	5	1	2	8	0	0	0	0
3	3	5	1	4	2	5.28388	6.50009	1.49991	1
3	3	5	1	4	4	4.92841	5.67237	0.89993	1
3	3	5	1	4	6	8.18795	8.54864	0.19997	1
3	3	5	1	4	8	8.18795	8.54864	0.19997	1
3	3	5	1	6	2	7.299	8.36006	1.99987	1
3	3	5	1	6	4	5.99178	6.98982	1.29994	1
3	3	5	1	6	6	4.92841	5.67237	0.89993	1
3	3	5	1	6	8	7.92862	8.29555	0.59995	1
3	3	5	1.5	2	2	5.99178	6.98982	1.29994	1
3	3	5	1.5	2	4	3.60531	4.56812	0.39997	1
3	3	5	1.5	2	6	8.18795	8.54864	0.09998	1
3	3	5	1.5	2	8	0	0	0	0
3	3	5	1.5	4	2	7.13457	8.18968	1.79988	1
3	3	5	1.5	4	4	5.99178	6.98982	1.29994	1
3	3	5	1.5	4	6	3.25787	4.37309	1.09992	1
3	3	5	1.5	4	8	3.60531	4.56812	0.39997	1
3	3	5	1.5	6	2	7.299	8.36006	1.99987	1
3	3	5	1.5	6	4	5.28388	6.50009	1.49991	1
3	3	5	1.5	6	6	5.99178	6.98982	1.29994	1
3	3	5	1.5	6	8	5.34718	6.31265	1.19992	1
3	3	5	2	2	2	6.68336	7.69838	1.69988	1
3	3	5	2	2	4	5.67113	6.62675	1.19993	1
3	3	5	2	2	6	5.99178	6.98982	0.5	1
3	3	5	2	2	8	5.99178	6.98982	0.5	1
3	3	5	2	4	2	7.299	8.36006	1.99987	1
3	3	5	2	4	4	6.68336	7.69838	1.69988	1
3	3	5	2	4	6	5.28388	6.50009	1.49991	1
3	3	5	2	4	8	5.67113	6.62675	1.19993	1
3	3	5	2	6	2	7.299	8.36006	1.99987	1
3	3	5	2	6	4	7.299	8.36006	1.99987	1
3	3	5	2	6	6	6.68336	7.69838	1.69988	1
3	3	5	2	6	8	5.28388	6.50009	1.49991	1
3	3	5	2.5	2	2	7.299	8.36006	1.99987	1
3	3	5	2.5	2	4	7.13457	8.18968	1.5999	1
3	3	5	2.5	2	6	6.68336	7.69838	0.89994	1
3	3	5	2.5	2	8	6.27296	7.29651	0.79997	1
3	3	5	2.5	4	2	7.299	8.36006	1.99987	1
3	3	5	2.5	4	4	7.299	8.36006	1.99987	1
3	3	5	2.5	4	6	7.37359	8.35918	1.89986	1
3	3	5	2.5	4	8	7.13457	8.18968	1.5999	1
3	3	5	2.5	6	2	7.299	8.36006	1.99987	1
3	3	5	2.5	6	4	7.299	8.36006	1.99987	1
3	3	5	2.5	6	6	7.299	8.36006	1.99987	1
3	3	5	2.5	6	8	7.299	8.36006	1.99987	1
3	3	6	1	2	2	4.56036	5.43414	0.89993	1
3	3	6	1	2	4	10.4945	10.5386	0.09999	1
3	3	6	1	2	6	0	0	0	0
3	3	6	1	2	8	0	0	0	0
3	3	6	1	4	2	5.578	6.67205	1.49991	1
3	3	6	1	4	4	4.56036	5.43414	0.89993	1
3	3	6	1	4	6	10.602	10.6443	0.59995	1
3	3	6	1	4	8	10.4945	10.5386	0.09999	1
3	3	6	1	6	2	7.38253	8.31443	1.89986	1
3	3	6	1	6	4	5.69724	6.68518	1.29994	1
3	3	6	1	6	6	4.56036	5.43414	0.89993	1
3	3	6	1	6	8	8.07212	8.43664	0.69994	1
3	3	6	1.5	2	2	5.69724	6.68518	1.29994	1
3	3	6	1.5	2	4	4.20152	5.02457	0.99987	1
3	3	6	1.5	2	6	8.07212	8.43664	0.09999	1
3	3	6	1.5	2	8	0	0	0	0
3	3	6	1.5	4	2	7.05985	8.05322	1.79988	1
3	3	6	1.5	4	4	5.69724	6.68518	1.29994	1
3	3	6	1.5	4	6	3.50736	4.57501	1.09992	1
3	3	6	1.5	4	8	4.20152	5.02457	0.99987	1
3	3	6	1.5	6	2	7.38253	8.31443	1.89986	1
3	3	6	1.5	6	4	5.578	6.67205	1.49991	1
3	3	6	1.5	6	6	5.69724	6.68518	1.29994	1
3	3	6	1.5	6	8	5.38563	6.34402	1.19992	1
3	3	6	2	2	2	6.623	7.56566	1.69988	1
3	3	6	2	2	4	5.54982	6.51611	1.39991	1
3	3	6	2	2	6	5.69724	6.68518	0.69999	1
3	3	6	2	2	8	5.38563	6.34402	0.59997	1
3	3	6	2	4	2	7.38253	8.31443	1.89986	1
3	3	6	2	4	4	6.623	7.56566	1.69988	1
3	3	6	2	4	6	5.578	6.67205	1.49991	1
3	3	6	2	4	8	5.54982	6.51611	1.39991	1
3	3	6	2	6	2	7.38253	8.31443	1.89986	1
3	3	6	2	6	4	7.38253	8.31443	1.89986	1
3	3	6	2	6	6	6.623	7.56566	1.69988	1
3	3	6	2	6	8	5.578	6.67205	1.49991	1
3	3	6	2.5	2	2	7.38253	8.31443	1.89986	1
3	3	6	2.5	2	4	7.05985	8.05322	1.79988	1
3	3	6	2.5	2	6	6.623	7.56566	1.09993	1
3	3	6	2.5	2	8	6.50048	7.47399	0.99996	1
3	3	6	2.5	4	2	7.38253	8.31443	1.89986	1
3	3	6	2.5	4	4	7.38253	8.31443	1.89986	1
3	3	6	2.5	4	6	7.38253	8.31443	1.89986	1
3	3	6	2.5	4	8	7.05985	8.05322	1.79988	1
3	3	6	2.5	6	2	7.38253	8.31443	1.89986	1
3	3	6	2.5	6	4	7.38253	8.31443	1.89986	1
3	3	6	2.5	6	6	7.38253	8.31443	1.89986	1
3	3	6	2.5	6	8	7.38253	8.31443	1.89986	1
3	3	7	1	2	2	5.83606	6.51622	0.79994	1
3	3	7	1	2	4	11.1376	11.1022	0.09999	1
3	3	7	1	2	6	0	0	0	0
3	3	7	1	2	8	0	0	0	0
3	3	7	1	4	2	5.83115	6.84731	1.49991	1
3	3	7	1	4	4	5.83606	6.51622	0.79994	1
3	3	7	1	4	6	9.20448	9.42892	0.59995	1
3	3	7	1	4	8	11.1376	11.1022	0.09999	1
3	3	7	1	6	2	7.08343	8.00721	1.79988	1
3	3	7	1	6	4	5.26187	6.18091	1.19992	1
3	3	7	1	6	6	5.83606	6.51622	0.79994	1
3	3	7	1	6	8	6.83049	7.38423	0.69994	1
3	3	7	1.5	2	2	5.53317	6.5207	1.29994	1
3	3	7	1.5	2	4	4.20633	5.03566	0.99987	1
3	3	7	1.5	2	6	6.83049	7.38423	0.49996	1
3	3	7	1.5	2	8	6.83049	7.38423	0	1
3	3	7	1.5	4	2	7.08343	8.00721	1.79988	1
3	3	7	1.5	4	4	5.53317	6.5207	1.29994	1
3	3	7	1.5	4	6	3.82916	4.8481	1.09992	1
3	3	7	1.5	4	8	4.20633	5.03566	0.99987	1
3	3	7	1.5	6	2	7.08343	8.00721	1.79988	1
3	3	7	1.5	6	4	5.83115	6.84731	1.49991	1
3	3	7	1.5	6	6	5.53317	6.5207	1.29994	1
3	3	7	1.5	6	8	3.82916	4.8481	1.09992	1
3	3	7	2	2	2	6.46504	7.37022	1.59991	1
3	3	7	2	2	4	5.70589	6.60163	1.39991	1
3	3	7	2	2	6	5.53317	6.5207	1.09996	1
3	3	7	2	2	8	5.26187	6.18091	0.69996	1
3	3	7	2	4	2	7.08343	8.00721	1.79988	1
3	3	7	2	4	4	6.46504	7.37022	1.59991	1
3	3	7	2	4	6	5.83115	6.84731	1.49991	1
3	3	7	2	4	8	5.70589	6.60163	1.39991	1
3	3	7	2	6	2	7.08343	8.00721	1.79988	1
3	3	7	2	6	4	7.08343	8.00721	1.79988	1
3	3	7	2	6	6	6.46504	7.37022	1.59991	1
3	3	7	2	6	8	5.83115	6.84731	1.49991	1
3	3	7	2.5	2	2	7.08343	8.00721	1.79988	1
3	3	7	2.5	2	4	7.08343	8.00721	1.79988	1
3	3	7	2.5	2	6	6.66129	7.53039	1.4999	1
3	3	7	2.5	2	8	6.46504	7.37022	1.09995	1
3	3	7	2.5	4	2	7.08343	8.00721	1.79988	1
3	3	7	2.5	4	4	7.08343	8.00721	1.79988	1
3	3	7	2.5	4	6	7.08343	8.00721	1.79988	1
3	3	7	2.5	4	8	7.08343	8.00721	1.79988	1
3	3	7	2.5	6	2	7.08343	8.00721	1.79988	1
3	3	7	2.5	6	4	7.08343	8.00721	1.79988	1
3	3	7	2.5	6	6	7.08343	8.00721	1.79988	1
3	3	7	2.5	6	8	7.08343	8.00721	1.79988	1
3	3	8	1	2	2	4.60629	5.40561	0.89993	1
3	3	8	1	2	4	10.9393	10.9373	0.39998	1
3	3	8	1	2	6	0	0	0	0
3	3	8	1	2	8	0	0	0	0
3	3	8	1	4	2	5.87639	6.80619	1.49991	1
3	3	8	1	4	4	4.60629	5.40561	0.89993	1
3	3	8	1	4	6	8.0636	8.45268	0.59995	1
3	3	8	1	4	8	10.9393	10.9373	0.39998	1
3	3	8	1	6	2	6.74071	7.53447	1.69988	1
3	3	8	1	6	4	5.17493	6.07599	1.19992	1
3	3	8	1	6	6	4.60629	5.40561	0.89993	1
3	3	8	1	6	8	6.23724	6.89386	0.69994	1
3	3	8	1.5	2	2	5.59768	6.52437	1.29994	1
3	3	8	1.5	2	4	4.34006	5.16266	0.99987	1
3	3	8	1.5	2	6	6.23724	6.89386	0.69994	1
3	3	8	1.5	2	8	6.23724	6.89386	0.29996	1
3	3	8	1.5	4	2	6.74071	7.53447	1.69988	1
3	3	8	1.5	4	4	5.59768	6.52437	1.29994	1
3	3	8	1.5	4	6	3.9885	4.90322	1.09992	1
3	3	8	1.5	4	8	4.34006	5.16266	0.99987	1
3	3	8	1.5	6	2	6.74071	7.53447	1.69988	1
3	3	8	1.5	6	4	5.87639	6.80619	1.49991	1
3	3	8	1.5	6	6	5.59768	6.52437	1.29994	1
3	3	8	1.5	6	8	3.9885	4.90322	1.09992	1
3	3	8	2	2	2	6.50208	7.33491	1.59991	1
3	3	8	2	2	4	5.86802	6.71418	1.39991	1
3	3	8	2	2	6	5.59768	6.52437	1.29994	1
3	3	8	2	2	8	5.17493	6.07599	0.79994	1
3	3	8	2	4	2	6.74071	7.53447	1.69988	1
3	3	8	2	4	4	6.50208	7.33491	1.59991	1
3	3	8	2	4	6	5.87639	6.80619	1.49991	1
3	3	8	2	4	8	5.86802	6.71418	1.39991	1
3	3	8	2	6	2	6.74071	7.53447	1.69988	1
3	3	8	2	6	4	6.74071	7.53447	1.69988	1
3	3	8	2	6	6	6.50208	7.33491	1.59991	1
3	3	8	2	6	8	5.87639	6.80619	1.49991	1
3	3	8	2.5	2	2	6.74071	7.53447	1.69988	1
3	3	8	2.5	2	4	6.74071	7.53447	1.69988	1
3	3	8	2.5	2	6	6.50208	7.33491	1.59991	1
3	3	8	2.5	2	8	6.50208	7.33491	1.19993	1
3	3	8	2.5	4	2	6.74071	7.53447	1.69988	1
3	3	8	2.5	4	4	6.74071	7.53447	1.69988	1
3	3	8	2.5	4	6	6.74071	7.53447	1.69988	1
3	3	8	2.5	4	8	6.74071	7.53447	1.69988	1
3	3	8	2.5	6	2	6.74071	7.53447	1.69988	1
3	3	8	2.5	6	4	6.74071	7.53447	1.69988	1
3	3	8	2.5	6	6	6.74071	7.53447	1.69988	1
3	3	8	2.5	6	8	6.74071	7.53447	1.69988	1
3	3	9	1	2	2	4.62595	5.4163	0.89993	1
3	3	9	1	2	4	9.99976	10.1103	0.39998	1
3	3	9	1	2	6	0	0	0	0
3	3	9	1	2	8	0	0	0	0
3	3	9	1	4	2	5.91704	6.687	1.39991	1
3	3	9	1	4	4	4.62595	5.4163	0.89993	1
3	3	9	1	4	6	7.40692	7.90164	0.59995	1
3	3	9	1	4	8	9.99976	10.1103	0.39998	1
3	3	9	1	6	2	6.57635	7.33344	1.59991	1
3	3	9	1	6	4	5.25536	6.09345	1.19992	1
3	3	9	1	6	6	4.62595	5.4163	0.89993	1
3	3	9	1	6	8	5.95437	6.63686	0.69994	1
3	3	9	1.5	2	2	5.70278	6.5776	1.29994	1
3	3	9	1.5	2	4	4.42685	5.17967	0.99987	1
3	3	9	1.5	2	6	5.42337	6.12189	0.39996	1
3	3	9	1.5	2	8	5.95437	6.63686	0.29996	1
3	3	9	1.5	4	2	6.57635	7.33344	1.59991	1
3	3	9	1.5	4	4	5.70278	6.5776	1.29994	1
3	3	9	1.5	4	6	4.07946	4.93719	1.09992	1
3	3	9	1.5	4	8	4.42685	5.17967	0.99987	1
3	3	9	1.5	6	2	6.57635	7.33344	1.59991	1
3	3	9	1.5	6	4	5.9615	6.80446	1.49991	1
3	3	9	1.5	6	6	5.70278	6.5776	1.29994	1
3	3	9	1.5	6	8	4.07946	4.93719	1.09992	1
3	3	9	2	2	2	6.57635	7.33344	1.59991	1
3	3	9	2	2	4	5.91704	6.687	1.39991	1
3	3	9	2	2	6	5.25536	6.09345	0.79994	1
3	3	9	2	2	8	5.25536	6.09345	0.79994	1
3	3	9	2	4	2	6.57635	7.33344	1.59991	1
3	3	9	2	4	4	6.57635	7.33344	1.59991	1
3	3	9	2	4	6	5.9615	6.80446	1.49991	1
3	3	9	2	4	8	5.91704	6.687	1.39991	1
3	3	9	2	6	2	6.57635	7.33344	1.59991	1
3	3	9	2	6	4	6.57635	7.33344	1.59991	1
3	3	9	2	6	6	6.57635	7.33344	1.59991	1
3	3	9	2	6	8	5.9615	6.80446	1.49991	1
3	3	9	2.5	2	2	6.57635	7.33344	1.59991	1
3	3	9	2.5	2	4	6.57635	7.33344	1.59991	1
3	3	9	2.5	2	6	6.57635	7.33344	1.19993	1
3	3	9	2.5	2	8	6.57635	7.33344	1.19993	1
3	3	9	2.5	4	2	6.57635	7.33344	1.59991	1
3	3	9	2.5	4	4	6.57635	7.33344	1.59991	1
3	3	9	2.5	4	6	6.57635	7.33344	1.59991	1
3	3	9	2.5	4	8	6.57635	7.33344	1.59991	1
3	3	9	2.5	6	2	6.57635	7.33344	1.59991	1
3	3	9	2.5	6	4	6.57635	7.33344	1.59991	1
3	3	9	2.5	6	6	6.57635	7.33344	1.59991	1
3	3	9	2.5	6	8	6.57635	7.33344	1.59991	1

## Sheet: Flight 4
FLIGHT Nr.	Encounter	Window size W	t_p [s]	D_LIM [m]	Vsc scale k_V	Distance with firm braking [m]	Distance with emergency braking [m]	DNT (maxT) [s]	Safe (0), Danger (1)
4	1	3	1	2	2	0	0	0	0
4	1	3	1	2	4	0	0	0	0
4	1	3	1	2	6	0	0	0	0
4	1	3	1	2	8	0	0	0	0
4	1	3	1	4	2	7.08251	7.09195	0.1	1
4	1	3	1	4	4	0	0	0	0
4	1	3	1	4	6	0	0	0	0
4	1	3	1	4	8	0	0	0	0
4	1	3	1	6	2	7.08251	7.09195	0.40001	1
4	1	3	1	6	4	-15.674	-13.3453	0	1
4	1	3	1	6	6	0	0	0	0
4	1	3	1	6	8	0	0	0	0
4	1	3	1.5	2	2	0	0	0	0
4	1	3	1.5	2	4	0	0	0	0
4	1	3	1.5	2	6	0	0	0	0
4	1	3	1.5	2	8	0	0	0	0
4	1	3	1.5	4	2	7.08251	7.09195	0.1	1
4	1	3	1.5	4	4	0	0	0	0
4	1	3	1.5	4	6	0	0	0	0
4	1	3	1.5	4	8	0	0	0	0
4	1	3	1.5	6	2	3.36288	4.35174	0.70001	1
4	1	3	1.5	6	4	7.08251	7.09195	0.1	1
4	1	3	1.5	6	6	0	0	0	0
4	1	3	1.5	6	8	0	0	0	0
4	1	3	2	2	2	0	0	0	0
4	1	3	2	2	4	0	0	0	0
4	1	3	2	2	6	0	0	0	0
4	1	3	2	2	8	0	0	0	0
4	1	3	2	4	2	7.08251	7.09195	0.40001	1
4	1	3	2	4	4	0	0	0	0
4	1	3	2	4	6	0	0	0	0
4	1	3	2	4	8	0	0	0	0
4	1	3	2	6	2	3.36288	4.35174	1.3	1
4	1	3	2	6	4	7.08251	7.09195	0.1	1
4	1	3	2	6	6	0	0	0	0
4	1	3	2	6	8	0	0	0	0
4	1	3	2.5	2	2	0	0	0	0
4	1	3	2.5	2	4	0	0	0	0
4	1	3	2.5	2	6	0	0	0	0
4	1	3	2.5	2	8	0	0	0	0
4	1	3	2.5	4	2	7.08251	7.09195	0.40001	1
4	1	3	2.5	4	4	0	0	0	0
4	1	3	2.5	4	6	0	0	0	0
4	1	3	2.5	4	8	0	0	0	0
4	1	3	2.5	6	2	3.36288	4.35174	1.3	1
4	1	3	2.5	6	4	7.08251	7.09195	0.1	1
4	1	3	2.5	6	6	0	0	0	0
4	1	3	2.5	6	8	0	0	0	0
4	1	4	1	2	2	0	0	0	0
4	1	4	1	2	4	0	0	0	0
4	1	4	1	2	6	0	0	0	0
4	1	4	1	2	8	0	0	0	0
4	1	4	1	4	2	5.33405	5.68726	0.2	1
4	1	4	1	4	4	0	0	0	0
4	1	4	1	4	6	0	0	0	0
4	1	4	1	4	8	0	0	0	0
4	1	4	1	6	2	5.33405	5.68726	0.59998	1
4	1	4	1	6	4	9.3559	8.73623	0	1
4	1	4	1	6	6	0	0	0	0
4	1	4	1	6	8	0	0	0	0
4	1	4	1.5	2	2	0	0	0	0
4	1	4	1.5	2	4	0	0	0	0
4	1	4	1.5	2	6	0	0	0	0
4	1	4	1.5	2	8	0	0	0	0
4	1	4	1.5	4	2	5.33405	5.68726	0.29999	1
4	1	4	1.5	4	4	0	0	0	0
4	1	4	1.5	4	6	0	0	0	0
4	1	4	1.5	4	8	0	0	0	0
4	1	4	1.5	6	2	2.95045	3.75338	1.39998	1
4	1	4	1.5	6	4	5.80197	5.91712	0.1	1
4	1	4	1.5	6	6	0	0	0	0
4	1	4	1.5	6	8	0	0	0	0
4	1	4	2	2	2	0	0	0	0
4	1	4	2	2	4	0	0	0	0
4	1	4	2	2	6	0	0	0	0
4	1	4	2	2	8	0	0	0	0
4	1	4	2	4	2	5.33405	5.68726	0.29999	1
4	1	4	2	4	4	0	0	0	0
4	1	4	2	4	6	0	0	0	0
4	1	4	2	4	8	0	0	0	0
4	1	4	2	6	2	2.95045	3.75338	1.39998	1
4	1	4	2	6	4	2.8642	3.24022	0.20001	1
4	1	4	2	6	6	0	0	0	0
4	1	4	2	6	8	0	0	0	0
4	1	4	2.5	2	2	9.3559	8.73623	0	1
4	1	4	2.5	2	4	0	0	0	0
4	1	4	2.5	2	6	0	0	0	0
4	1	4	2.5	2	8	0	0	0	0
4	1	4	2.5	4	2	5.33405	5.68726	0.59998	1
4	1	4	2.5	4	4	9.3559	8.73623	0	1
4	1	4	2.5	4	6	0	0	0	0
4	1	4	2.5	4	8	0	0	0	0
4	1	4	2.5	6	2	2.0425	3.1016	1.49999	1
4	1	4	2.5	6	4	5.33405	5.68726	0.29999	1
4	1	4	2.5	6	6	9.3559	8.73623	0	1
4	1	4	2.5	6	8	0	0	0	0
4	1	5	1	2	2	0	0	0	0
4	1	5	1	2	4	0	0	0	0
4	1	5	1	2	6	0	0	0	0
4	1	5	1	2	8	0	0	0	0
4	1	5	1	4	2	5.98433	6.05272	0.19998	1
4	1	5	1	4	4	0	0	0	0
4	1	5	1	4	6	0	0	0	0
4	1	5	1	4	8	0	0	0	0
4	1	5	1	6	2	3.09427	3.8522	1.39996	1
4	1	5	1	6	4	7.91458	7.63716	0	1
4	1	5	1	6	6	0	0	0	0
4	1	5	1	6	8	0	0	0	0
4	1	5	1.5	2	2	0	0	0	0
4	1	5	1.5	2	4	0	0	0	0
4	1	5	1.5	2	6	0	0	0	0
4	1	5	1.5	2	8	0	0	0	0
4	1	5	1.5	4	2	5.02617	5.38919	0.19998	1
4	1	5	1.5	4	4	0	0	0	0
4	1	5	1.5	4	6	0	0	0	0
4	1	5	1.5	4	8	0	0	0	0
4	1	5	1.5	6	2	2.66806	3.54671	1.49998	1
4	1	5	1.5	6	4	5.98433	6.05272	0.1	1
4	1	5	1.5	6	6	0	0	0	0
4	1	5	1.5	6	8	0	0	0	0
4	1	5	2	2	2	0	0	0	0
4	1	5	2	2	4	0	0	0	0
4	1	5	2	2	6	0	0	0	0
4	1	5	2	2	8	0	0	0	0
4	1	5	2	4	2	5.02617	5.38919	0.49999	1
4	1	5	2	4	4	0	0	0	0
4	1	5	2	4	6	0	0	0	0
4	1	5	2	4	8	0	0	0	0
4	1	5	2	6	2	2.66806	3.54671	1.49998	1
4	1	5	2	6	4	5.98433	6.05272	0.19998	1
4	1	5	2	6	6	0	0	0	0
4	1	5	2	6	8	0	0	0	0
4	1	5	2.5	2	2	7.91458	7.63716	0	1
4	1	5	2.5	2	4	0	0	0	0
4	1	5	2.5	2	6	0	0	0	0
4	1	5	2.5	2	8	0	0	0	0
4	1	5	2.5	4	2	5.02617	5.38919	1.29997	1
4	1	5	2.5	4	4	7.91458	7.63716	0	1
4	1	5	2.5	4	6	0	0	0	0
4	1	5	2.5	4	8	0	0	0	0
4	1	5	2.5	6	2	2.66806	3.54671	1.49998	1
4	1	5	2.5	6	4	5.02617	5.38919	0.19998	1
4	1	5	2.5	6	6	7.91458	7.63716	0	1
4	1	5	2.5	6	8	0	0	0	0
4	1	6	1	2	2	0	0	0	0
4	1	6	1	2	4	0	0	0	0
4	1	6	1	2	6	0	0	0	0
4	1	6	1	2	8	0	0	0	0
4	1	6	1	4	2	5.51212	5.62316	0.19998	1
4	1	6	1	4	4	0	0	0	0
4	1	6	1	4	6	0	0	0	0
4	1	6	1	4	8	0	0	0	0
4	1	6	1	6	2	2.78195	3.61853	1.49994	1
4	1	6	1	6	4	0	0	0	0
4	1	6	1	6	6	0	0	0	0
4	1	6	1	6	8	0	0	0	0
4	1	6	1.5	2	2	0	0	0	0
4	1	6	1.5	2	4	0	0	0	0
4	1	6	1.5	2	6	0	0	0	0
4	1	6	1.5	2	8	0	0	0	0
4	1	6	1.5	4	2	4.61671	5.04917	0.39999	1
4	1	6	1.5	4	4	0	0	0	0
4	1	6	1.5	4	6	0	0	0	0
4	1	6	1.5	4	8	0	0	0	0
4	1	6	1.5	6	2	2.78195	3.61853	1.49994	1
4	1	6	1.5	6	4	7.54383	7.39046	0	1
4	1	6	1.5	6	6	0	0	0	0
4	1	6	1.5	6	8	0	0	0	0
4	1	6	2	2	2	0	0	0	0
4	1	6	2	2	4	0	0	0	0
4	1	6	2	2	6	0	0	0	0
4	1	6	2	2	8	0	0	0	0
4	1	6	2	4	2	3.46961	4.14444	0.59999	1
4	1	6	2	4	4	0	0	0	0
4	1	6	2	4	6	0	0	0	0
4	1	6	2	4	8	0	0	0	0
4	1	6	2	6	2	2.0441	3.08894	1.59996	1
4	1	6	2	6	4	5.51212	5.62316	0.19998	1
4	1	6	2	6	6	0	0	0	0
4	1	6	2	6	8	0	0	0	0
4	1	6	2.5	2	2	7.54383	7.39046	0	1
4	1	6	2.5	2	4	0	0	0	0
4	1	6	2.5	2	6	0	0	0	0
4	1	6	2.5	2	8	0	0	0	0
4	1	6	2.5	4	2	3.46961	4.14444	1.29997	1
4	1	6	2.5	4	4	7.54383	7.39046	0	1
4	1	6	2.5	4	6	0	0	0	0
4	1	6	2.5	4	8	0	0	0	0
4	1	6	2.5	6	2	2.0441	3.08894	1.59996	1
4	1	6	2.5	6	4	4.56108	4.89551	0.49999	1
4	1	6	2.5	6	6	7.54383	7.39046	0	1
4	1	6	2.5	6	8	0	0	0	0
4	1	7	1	2	2	0	0	0	0
4	1	7	1	2	4	0	0	0	0
4	1	7	1	2	6	0	0	0	0
4	1	7	1	2	8	0	0	0	0
4	1	7	1	4	2	5.41525	5.5462	0.19998	1
4	1	7	1	4	4	0	0	0	0
4	1	7	1	4	6	0	0	0	0
4	1	7	1	4	8	0	0	0	0
4	1	7	1	6	2	3.12711	3.86442	1.39995	1
4	1	7	1	6	4	0	0	0	0
4	1	7	1	6	6	0	0	0	0
4	1	7	1	6	8	0	0	0	0
4	1	7	1.5	2	2	0	0	0	0
4	1	7	1.5	2	4	0	0	0	0
4	1	7	1.5	2	6	0	0	0	0
4	1	7	1.5	2	8	0	0	0	0
4	1	7	1.5	4	2	4.75718	5.10773	0.29998	1
4	1	7	1.5	4	4	0	0	0	0
4	1	7	1.5	4	6	0	0	0	0
4	1	7	1.5	4	8	0	0	0	0
4	1	7	1.5	6	2	2.23713	3.19687	1.59998	1
4	1	7	1.5	6	4	6.88411	6.87487	0	1
4	1	7	1.5	6	6	0	0	0	0
4	1	7	1.5	6	8	0	0	0	0
4	1	7	2	2	2	0	0	0	0
4	1	7	2	2	4	0	0	0	0
4	1	7	2	2	6	0	0	0	0
4	1	7	2	2	8	0	0	0	0
4	1	7	2	4	2	3.53395	4.16295	1.29994	1
4	1	7	2	4	4	0	0	0	0
4	1	7	2	4	6	0	0	0	0
4	1	7	2	4	8	0	0	0	0
4	1	7	2	6	2	2.23713	3.19687	1.59998	1
4	1	7	2	6	4	5.41525	5.5462	0.19998	1
4	1	7	2	6	6	0	0	0	0
4	1	7	2	6	8	0	0	0	0
4	1	7	2.5	2	2	0	0	0	0
4	1	7	2.5	2	4	0	0	0	0
4	1	7	2.5	2	6	0	0	0	0
4	1	7	2.5	2	8	0	0	0	0
4	1	7	2.5	4	2	3.53395	4.16295	1.29994	1
4	1	7	2.5	4	4	0	0	0	0
4	1	7	2.5	4	6	0	0	0	0
4	1	7	2.5	4	8	0	0	0	0
4	1	7	2.5	6	2	-1.13652	2.39218	1.7	1
4	1	7	2.5	6	4	4.52604	4.86558	0.19998	1
4	1	7	2.5	6	6	0	0	0	0
4	1	7	2.5	6	8	0	0	0	0
4	1	8	1	2	2	0	0	0	0
4	1	8	1	2	4	0	0	0	0
4	1	8	1	2	6	0	0	0	0
4	1	8	1	2	8	0	0	0	0
4	1	8	1	4	2	6.6299	6.67494	0.09998	1
4	1	8	1	4	4	0	0	0	0
4	1	8	1	4	6	0	0	0	0
4	1	8	1	4	8	0	0	0	0
4	1	8	1	6	2	2.63155	3.45473	1.49999	1
4	1	8	1	6	4	0	0	0	0
4	1	8	1	6	6	0	0	0	0
4	1	8	1	6	8	0	0	0	0
4	1	8	1.5	2	2	0	0	0	0
4	1	8	1.5	2	4	0	0	0	0
4	1	8	1.5	2	6	0	0	0	0
4	1	8	1.5	2	8	0	0	0	0
4	1	8	1.5	4	2	4.23079	4.59598	0.39996	1
4	1	8	1.5	4	4	0	0	0	0
4	1	8	1.5	4	6	0	0	0	0
4	1	8	1.5	4	8	0	0	0	0
4	1	8	1.5	6	2	2.63155	3.45473	1.59996	1
4	1	8	1.5	6	4	6.6299	6.67494	0	1
4	1	8	1.5	6	6	0	0	0	0
4	1	8	1.5	6	8	0	0	0	0
4	1	8	2	2	2	0	0	0	0
4	1	8	2	2	4	0	0	0	0
4	1	8	2	2	6	0	0	0	0
4	1	8	2	2	8	0	0	0	0
4	1	8	2	4	2	3.88732	4.38875	1.19996	1
4	1	8	2	4	4	0	0	0	0
4	1	8	2	4	6	0	0	0	0
4	1	8	2	4	8	0	0	0	0
4	1	8	2	6	2	-1.46308	2.56125	1.69995	1
4	1	8	2	6	4	5.07793	5.25811	0.19998	1
4	1	8	2	6	6	0	0	0	0
4	1	8	2	6	8	0	0	0	0
4	1	8	2.5	2	2	0	0	0	0
4	1	8	2.5	2	4	0	0	0	0
4	1	8	2.5	2	6	0	0	0	0
4	1	8	2.5	2	8	0	0	0	0
4	1	8	2.5	4	2	3.206	3.89614	1.29994	1
4	1	8	2.5	4	4	0	0	0	0
4	1	8	2.5	4	6	0	0	0	0
4	1	8	2.5	4	8	0	0	0	0
4	1	8	2.5	6	2	-1.46308	2.56125	1.69995	1
4	1	8	2.5	6	4	4.43553	4.78994	0.59999	1
4	1	8	2.5	6	6	0	0	0	0
4	1	8	2.5	6	8	0	0	0	0
4	1	9	1	2	2	0	0	0	0
4	1	9	1	2	4	0	0	0	0
4	1	9	1	2	6	0	0	0	0
4	1	9	1	2	8	0	0	0	0
4	1	9	1	4	2	6.22879	6.3411	0.09998	1
4	1	9	1	4	4	0	0	0	0
4	1	9	1	4	6	0	0	0	0
4	1	9	1	4	8	0	0	0	0
4	1	9	1	6	2	2.74776	3.52131	1.49995	1
4	1	9	1	6	4	0	0	0	0
4	1	9	1	6	6	0	0	0	0
4	1	9	1	6	8	0	0	0	0
4	1	9	1.5	2	2	0	0	0	0
4	1	9	1.5	2	4	0	0	0	0
4	1	9	1.5	2	6	0	0	0	0
4	1	9	1.5	2	8	0	0	0	0
4	1	9	1.5	4	2	4.35939	4.70114	0.39996	1
4	1	9	1.5	4	4	0	0	0	0
4	1	9	1.5	4	6	0	0	0	0
4	1	9	1.5	4	8	0	0	0	0
4	1	9	1.5	6	2	1.96123	2.88699	1.59996	1
4	1	9	1.5	6	4	0	0	0	0
4	1	9	1.5	6	6	0	0	0	0
4	1	9	1.5	6	8	0	0	0	0
4	1	9	2	2	2	0	0	0	0
4	1	9	2	2	4	0	0	0	0
4	1	9	2	2	6	0	0	0	0
4	1	9	2	2	8	0	0	0	0
4	1	9	2	4	2	3.56308	4.1341	1.19996	1
4	1	9	2	4	4	0	0	0	0
4	1	9	2	4	6	0	0	0	0
4	1	9	2	4	8	0	0	0	0
4	1	9	2	6	2	-1.11395	2.25715	1.69995	1
4	1	9	2	6	4	6.22879	6.3411	0.09998	1
4	1	9	2	6	6	0	0	0	0
4	1	9	2	6	8	0	0	0	0
4	1	9	2.5	2	2	0	0	0	0
4	1	9	2.5	2	4	0	0	0	0
4	1	9	2.5	2	6	0	0	0	0
4	1	9	2.5	2	8	0	0	0	0
4	1	9	2.5	4	2	3.56308	4.1341	1.3	1
4	1	9	2.5	4	4	0	0	0	0
4	1	9	2.5	4	6	0	0	0	0
4	1	9	2.5	4	8	0	0	0	0
4	1	9	2.5	6	2	-1.11395	2.25715	1.69995	1
4	1	9	2.5	6	4	4.3388	4.7041	0.29998	1
4	1	9	2.5	6	6	0	0	0	0
4	1	9	2.5	6	8	0	0	0	0
4	2	3	1	2	2	4.25347	5.25371	0.09998	1
4	2	3	1	2	4	0	0	0	0
4	2	3	1	2	6	0	0	0	0
4	2	3	1	2	8	0	0	0	0
4	2	3	1	4	2	10.9324	11.5147	0.7	1
4	2	3	1	4	4	4.25347	5.25371	0.09998	1
4	2	3	1	4	6	4.15971	5.12769	0	1
4	2	3	1	4	8	0	0	0	0
4	2	3	1	6	2	10.9324	11.5147	1.09995	1
4	2	3	1	6	4	10.9324	11.5147	0.7	1
4	2	3	1	6	6	4.25347	5.25371	0.30001	1
4	2	3	1	6	8	4.15971	5.12769	0	1
4	2	3	1.5	2	2	10.9324	11.5147	0.39999	1
4	2	3	1.5	2	4	0	0	0	0
4	2	3	1.5	2	6	0	0	0	0
4	2	3	1.5	2	8	0	0	0	0
4	2	3	1.5	4	2	10.9324	11.5147	0.7	1
4	2	3	1.5	4	4	10.9324	11.5147	0.39999	1
4	2	3	1.5	4	6	4.11522	5.17018	0	1
4	2	3	1.5	4	8	4.11522	5.17018	0	1
4	2	3	1.5	6	2	7.50593	9.1191	1.19998	1
4	2	3	1.5	6	4	10.9324	11.5147	0.7	1
4	2	3	1.5	6	6	10.9324	11.5147	0.7	1
4	2	3	1.5	6	8	4.11522	5.17018	0.5	1
4	2	3	2	2	2	10.9324	11.5147	0.7	1
4	2	3	2	2	4	5.45162	6.88568	0.09996	1
4	2	3	2	2	6	4.11522	5.17018	0	1
4	2	3	2	2	8	4.11522	5.17018	0	1
4	2	3	2	4	2	7.50593	9.1191	0.7	1
4	2	3	2	4	4	10.9324	11.5147	0.7	1
4	2	3	2	4	6	10.9324	11.5147	0.5	1
4	2	3	2	4	8	5.45162	6.88568	0.39997	1
4	2	3	2	6	2	7.50593	9.1191	1.19998	1
4	2	3	2	6	4	10.9324	11.5147	0.7	1
4	2	3	2	6	6	10.9324	11.5147	0.7	1
4	2	3	2	6	8	10.9324	11.5147	0.5	1
4	2	3	2.5	2	2	7.50593	9.1191	0.7	1
4	2	3	2.5	2	4	10.9324	11.5147	0.09996	1
4	2	3	2.5	2	6	10.9324	11.5147	0	1
4	2	3	2.5	2	8	4.11522	5.17018	0	1
4	2	3	2.5	4	2	7.50593	9.1191	1.19998	1
4	2	3	2.5	4	4	7.50593	9.1191	0.7	1
4	2	3	2.5	4	6	10.9324	11.5147	0.5	1
4	2	3	2.5	4	8	10.9324	11.5147	0.39997	1
4	2	3	2.5	6	2	7.50593	9.1191	1.19998	1
4	2	3	2.5	6	4	7.50593	9.1191	0.7	1
4	2	3	2.5	6	6	7.50593	9.1191	0.7	1
4	2	3	2.5	6	8	7.50593	9.1191	0.5	1
4	2	4	1	2	2	6.74335	7.27118	0.29997	1
4	2	4	1	2	4	0	0	0	0
4	2	4	1	2	6	0	0	0	0
4	2	4	1	2	8	0	0	0	0
4	2	4	1	4	2	9.84255	10.6763	1.9	1
4	2	4	1	4	4	6.74335	7.27118	0.29997	1
4	2	4	1	4	6	0	0	0	0
4	2	4	1	4	8	0	0	0	0
4	2	4	1	6	2	7.78681	9.22592	2.4	1
4	2	4	1	6	4	7.81699	8.64924	1.70002	1
4	2	4	1	6	6	6.74335	7.27118	1.00003	1
4	2	4	1	6	8	6.74335	7.27118	0.40005	1
4	2	4	1.5	2	2	7.81699	8.64924	1.29997	1
4	2	4	1.5	2	4	4.893	5.80313	0.10002	1
4	2	4	1.5	2	6	6.74335	7.27118	0	1
4	2	4	1.5	2	8	0	0	0	0
4	2	4	1.5	4	2	7.78681	9.22592	2.29994	1
4	2	4	1.5	4	4	7.81699	8.64924	1.29997	1
4	2	4	1.5	4	6	5.59801	6.65176	0.99996	1
4	2	4	1.5	4	8	5.88885	6.78685	0.30002	1
4	2	4	1.5	6	2	7.78681	9.22592	2.4	1
4	2	4	1.5	6	4	9.84255	10.6763	2.30005	1
4	2	4	1.5	6	6	7.81699	8.64924	1.70002	1
4	2	4	1.5	6	8	8.6508	9.25504	1.60001	1
4	2	4	2	2	2	9.84255	10.6763	1.9	1
4	2	4	2	2	4	6.76419	7.88284	0.79996	1
4	2	4	2	2	6	8.28877	8.87912	0.49999	1
4	2	4	2	2	8	5.59801	6.65176	0.39998	1
4	2	4	2	4	2	7.78681	9.22592	2.29994	1
4	2	4	2	4	4	9.84255	10.6763	1.9	1
4	2	4	2	4	6	6.20652	7.49025	1.49996	1
4	2	4	2	4	8	6.76419	7.88284	0.79996	1
4	2	4	2	6	2	7.78681	9.22592	2.4	1
4	2	4	2	6	4	7.78681	9.22592	2.4	1
4	2	4	2	6	6	9.84255	10.6763	2.30005	1
4	2	4	2	6	8	9.84255	10.6763	2.10001	1
4	2	4	2.5	2	2	7.78681	9.22592	1.99995	1
4	2	4	2.5	2	4	9.84255	10.6763	1.30002	1
4	2	4	2.5	2	6	9.84255	10.6763	0.49999	1
4	2	4	2.5	2	8	6.20652	7.49025	0.39998	1
4	2	4	2.5	4	2	7.78681	9.22592	2.29994	1
4	2	4	2.5	4	4	7.78681	9.22592	1.99995	1
4	2	4	2.5	4	6	7.78681	9.22592	1.99995	1
4	2	4	2.5	4	8	7.78681	9.22592	1.39997	1
4	2	4	2.5	6	2	7.78681	9.22592	2.4	1
4	2	4	2.5	6	4	7.78681	9.22592	2.4	1
4	2	4	2.5	6	6	7.78681	9.22592	2.4	1
4	2	4	2.5	6	8	7.78681	9.22592	2.4	1
4	2	5	1	2	2	6.42114	7.01523	0.59998	1
4	2	5	1	2	4	7.99874	8.31103	0	1
4	2	5	1	2	6	0	0	0	0
4	2	5	1	2	8	0	0	0	0
4	2	5	1	4	2	10.0732	10.8109	2.09996	1
4	2	5	1	4	4	6.42114	7.01523	0.59998	1
4	2	5	1	4	6	7.36276	7.78073	0.19999	1
4	2	5	1	4	8	7.99874	8.31103	0	1
4	2	5	1	6	2	7.8514	9.18311	2.40004	1
4	2	5	1	6	4	7.87904	8.70494	1.80001	1
4	2	5	1	6	6	6.42114	7.01523	1.10002	1
4	2	5	1	6	8	6.42114	7.01523	1.10002	1
4	2	5	1.5	2	2	7.87904	8.70494	1.29997	1
4	2	5	1.5	2	4	4.50346	5.50189	0.39999	1
4	2	5	1.5	2	6	6.42114	7.01523	0.29997	1
4	2	5	1.5	2	8	7.36276	7.78073	0.19999	1
4	2	5	1.5	4	2	7.8514	9.18311	2.30005	1
4	2	5	1.5	4	4	7.87904	8.70494	1.29997	1
4	2	5	1.5	4	6	6.83462	7.60465	0.99996	1
4	2	5	1.5	4	8	5.69765	6.65505	0.9	1
4	2	5	1.5	6	2	7.8514	9.18311	2.40004	1
4	2	5	1.5	6	4	10.0732	10.8109	2.30001	1
4	2	5	1.5	6	6	7.87904	8.70494	1.80001	1
4	2	5	1.5	6	8	7.49762	8.31734	1.7	1
4	2	5	2	2	2	10.0732	10.8109	1.79997	1
4	2	5	2	2	4	6.14064	7.39024	1.39994	1
4	2	5	2	2	6	8.26959	8.88045	0.79996	1
4	2	5	2	2	8	6.83462	7.60465	0.69995	1
4	2	5	2	4	2	7.8514	9.18311	2.30005	1
4	2	5	2	4	4	10.0732	10.8109	1.79997	1
4	2	5	2	4	6	10.0732	10.8109	1.49996	1
4	2	5	2	4	8	6.14064	7.39024	1.39994	1
4	2	5	2	6	2	7.8514	9.18311	2.40004	1
4	2	5	2	6	4	7.8514	9.18311	2.40004	1
4	2	5	2	6	6	10.0732	10.8109	2.30001	1
4	2	5	2	6	8	10.0732	10.8109	2.30001	1
4	2	5	2.5	2	2	7.8514	9.18311	1.9	1
4	2	5	2.5	2	4	7.8514	9.18311	1.9	1
4	2	5	2.5	2	6	10.0732	10.8109	0.79996	1
4	2	5	2.5	2	8	7.87904	8.70494	0.69995	1
4	2	5	2.5	4	2	7.8514	9.18311	2.30005	1
4	2	5	2.5	4	4	7.8514	9.18311	1.9	1
4	2	5	2.5	4	6	7.8514	9.18311	1.9	1
4	2	5	2.5	4	8	7.8514	9.18311	1.9	1
4	2	5	2.5	6	2	7.8514	9.18311	2.40004	1
4	2	5	2.5	6	4	7.8514	9.18311	2.40004	1
4	2	5	2.5	6	6	7.8514	9.18311	2.40004	1
4	2	5	2.5	6	8	7.8514	9.18311	2.40004	1
4	2	6	1	2	2	5.75367	6.47709	0.59998	1
4	2	6	1	2	4	0	0	0	0
4	2	6	1	2	6	0	0	0	0
4	2	6	1	2	8	0	0	0	0
4	2	6	1	4	2	8.76938	9.63698	2.10001	1
4	2	6	1	4	4	5.75367	6.47709	0.59998	1
4	2	6	1	4	6	6.92887	7.41816	0.19999	1
4	2	6	1	4	8	0	0	0	0
4	2	6	1	6	2	8.2548	9.41978	2.30001	1
4	2	6	1	6	4	7.1358	8.1111	1.80001	1
4	2	6	1	6	6	5.75367	6.47709	1.10002	1
4	2	6	1	6	8	5.75367	6.47709	1.10002	1
4	2	6	1.5	2	2	6.60989	7.72975	1.39994	1
4	2	6	1.5	2	4	4.81683	5.73838	0.7	1
4	2	6	1.5	2	6	5.75367	6.47709	0.29997	1
4	2	6	1.5	2	8	5.75367	6.47709	0.29997	1
4	2	6	1.5	4	2	8.2548	9.41978	2.20002	1
4	2	6	1.5	4	4	6.60989	7.72975	1.69993	1
4	2	6	1.5	4	6	7.10362	7.83301	1.29995	1
4	2	6	1.5	4	8	6.50495	7.27939	1.19999	1
4	2	6	1.5	6	2	8.2548	9.41978	2.30001	1
4	2	6	1.5	6	4	8.2548	9.41978	2.30001	1
4	2	6	1.5	6	6	6.60989	7.72975	1.89998	1
4	2	6	1.5	6	8	7.52108	8.33695	1.7	1
4	2	6	2	2	2	8.2548	9.41978	1.79997	1
4	2	6	2	2	4	6.60989	7.72975	1.39994	1
4	2	6	2	2	6	7.50441	8.25591	1.09997	1
4	2	6	2	2	8	6.50495	7.27939	0.9	1
4	2	6	2	4	2	8.2548	9.41978	2.20002	1
4	2	6	2	4	4	8.2548	9.41978	2.09996	1
4	2	6	2	4	6	8.76938	9.63698	1.99995	1
4	2	6	2	4	8	6.60989	7.72975	1.69993	1
4	2	6	2	6	2	8.2548	9.41978	2.30001	1
4	2	6	2	6	4	8.2548	9.41978	2.30001	1
4	2	6	2	6	6	8.2548	9.41978	2.30001	1
4	2	6	2	6	8	8.76938	9.63698	2.2	1
4	2	6	2.5	2	2	8.2548	9.41978	1.79997	1
4	2	6	2.5	2	4	8.2548	9.41978	1.79997	1
4	2	6	2.5	2	6	8.76938	9.63698	1.09997	1
4	2	6	2.5	2	8	6.50495	7.27939	0.9	1
4	2	6	2.5	4	2	8.2548	9.41978	2.20002	1
4	2	6	2.5	4	4	8.2548	9.41978	2.09996	1
4	2	6	2.5	4	6	8.2548	9.41978	2.09996	1
4	2	6	2.5	4	8	8.2548	9.41978	2.09996	1
4	2	6	2.5	6	2	8.2548	9.41978	2.30001	1
4	2	6	2.5	6	4	8.2548	9.41978	2.30001	1
4	2	6	2.5	6	6	8.2548	9.41978	2.30001	1
4	2	6	2.5	6	8	8.2548	9.41978	2.30001	1
4	2	7	1	2	2	6.736	7.47444	0.7	1
4	2	7	1	2	4	0	0	0	0
4	2	7	1	2	6	0	0	0	0
4	2	7	1	2	8	0	0	0	0
4	2	7	1	4	2	7.62616	8.7781	2.10001	1
4	2	7	1	4	4	6.736	7.47444	0.7	1
4	2	7	1	4	6	6.28216	6.88523	0.5	1
4	2	7	1	4	8	7.77452	7.99088	0	1
4	2	7	1	6	2	7.62616	8.7781	2.29995	1
4	2	7	1	6	4	7.25312	8.18929	1.89996	1
4	2	7	1	6	6	6.736	7.47444	1.29999	1
4	2	7	1	6	8	5.7074	6.43389	1.19997	1
4	2	7	1.5	2	2	7.25312	8.18929	1.59996	1
4	2	7	1.5	2	4	6.736	7.47444	0.9	1
4	2	7	1.5	2	6	5.7074	6.43389	0.59998	1
4	2	7	1.5	2	8	5.7074	6.43389	0.59998	1
4	2	7	1.5	4	2	7.62616	8.7781	2.10001	1
4	2	7	1.5	4	4	7.25312	8.18929	1.70002	1
4	2	7	1.5	4	6	6.70107	7.50418	1.40001	1
4	2	7	1.5	4	8	6.736	7.47444	1.30005	1
4	2	7	1.5	6	2	7.62616	8.7781	2.29995	1
4	2	7	1.5	6	4	7.62616	8.7781	2.29995	1
4	2	7	1.5	6	6	7.25312	8.18929	1.89996	1
4	2	7	1.5	6	8	6.95683	7.88345	1.79995	1
4	2	7	2	2	2	7.62616	8.7781	1.99995	1
4	2	7	2	2	4	6.81421	7.89149	1.39994	1
4	2	7	2	2	6	7.47023	8.22979	1.09997	1
4	2	7	2	2	8	6.736	7.47444	0.9	1
4	2	7	2	4	2	7.62616	8.7781	2.10001	1
4	2	7	2	4	4	7.62616	8.7781	2.10001	1
4	2	7	2	4	6	8.63997	9.49985	2.00004	1
4	2	7	2	4	8	6.81421	7.89149	1.79999	1
4	2	7	2	6	2	7.62616	8.7781	2.29995	1
4	2	7	2	6	4	7.62616	8.7781	2.29995	1
4	2	7	2	6	6	7.62616	8.7781	2.29995	1
4	2	7	2	6	8	7.62616	8.7781	2.29995	1
4	2	7	2.5	2	2	7.62616	8.7781	1.99995	1
4	2	7	2.5	2	4	7.62616	8.7781	1.69996	1
4	2	7	2.5	2	6	7.62616	8.7781	1.09997	1
4	2	7	2.5	2	8	6.736	7.47444	0.9	1
4	2	7	2.5	4	2	7.62616	8.7781	2.10001	1
4	2	7	2.5	4	4	7.62616	8.7781	2.10001	1
4	2	7	2.5	4	6	7.62616	8.7781	2.10001	1
4	2	7	2.5	4	8	7.62616	8.7781	2.10001	1
4	2	7	2.5	6	2	7.62616	8.7781	2.29995	1
4	2	7	2.5	6	4	7.62616	8.7781	2.29995	1
4	2	7	2.5	6	6	7.62616	8.7781	2.29995	1
4	2	7	2.5	6	8	7.62616	8.7781	2.29995	1
4	2	8	1	2	2	6.46336	7.25009	1.19999	1
4	2	8	1	2	4	0	0	0	0
4	2	8	1	2	6	0	0	0	0
4	2	8	1	2	8	0	0	0	0
4	2	8	1	4	2	7.70286	8.78641	2.10003	1
4	2	8	1	4	4	6.46336	7.25009	1.30005	1
4	2	8	1	4	6	6.10465	6.73293	0.90005	1
4	2	8	1	4	8	7.42992	7.69421	0.40005	1
4	2	8	1	6	2	7.70286	8.78641	2.19998	1
4	2	8	1	6	4	7.26547	8.20192	1.89996	1
4	2	8	1	6	6	6.46336	7.25009	1.49999	1
4	2	8	1	6	8	5.51265	6.28525	1.19997	1
4	2	8	1.5	2	2	7.76613	8.67358	1.90001	1
4	2	8	1.5	2	4	6.46336	7.25009	0.9	1
4	2	8	1.5	2	6	5.51265	6.28525	0.59998	1
4	2	8	1.5	2	8	5.51265	6.28525	0.59998	1
4	2	8	1.5	4	2	7.70286	8.78641	2.10003	1
4	2	8	1.5	4	4	7.76613	8.67358	1.90001	1
4	2	8	1.5	4	6	6.74967	7.54368	1.40001	1
4	2	8	1.5	4	8	6.46336	7.25009	1.30005	1
4	2	8	1.5	6	2	7.70286	8.78641	2.19998	1
4	2	8	1.5	6	4	7.70286	8.78641	2.19998	1
4	2	8	1.5	6	6	7.76613	8.67358	2.09995	1
4	2	8	1.5	6	8	7.00042	7.90522	1.79995	1
4	2	8	2	2	2	7.70286	8.78641	2.00004	1
4	2	8	2	2	4	7.76613	8.67358	1.49996	1
4	2	8	2	2	6	7.00544	7.85354	1.09997	1
4	2	8	2	2	8	6.01899	6.8042	0.79997	1
4	2	8	2	4	2	7.70286	8.78641	2.10003	1
4	2	8	2	4	4	7.70286	8.78641	2.00004	1
4	2	8	2	4	6	7.76613	8.67358	1.90001	1
4	2	8	2	4	8	7.76613	8.67358	1.90001	1
4	2	8	2	6	2	7.70286	8.78641	2.19998	1
4	2	8	2	6	4	7.70286	8.78641	2.19998	1
4	2	8	2	6	6	7.70286	8.78641	2.19998	1
4	2	8	2	6	8	7.70286	8.78641	2.19998	1
4	2	8	2.5	2	2	7.70286	8.78641	2.00004	1
4	2	8	2.5	2	4	7.70286	8.78641	1.59999	1
4	2	8	2.5	2	6	7.70286	8.78641	1.09997	1
4	2	8	2.5	2	8	6.01899	6.8042	0.79997	1
4	2	8	2.5	4	2	7.70286	8.78641	2.10003	1
4	2	8	2.5	4	4	7.70286	8.78641	2.00004	1
4	2	8	2.5	4	6	7.70286	8.78641	2.00004	1
4	2	8	2.5	4	8	7.70286	8.78641	2.00004	1
4	2	8	2.5	6	2	7.70286	8.78641	2.19998	1
4	2	8	2.5	6	4	7.70286	8.78641	2.19998	1
4	2	8	2.5	6	6	7.70286	8.78641	2.19998	1
4	2	8	2.5	6	8	7.70286	8.78641	2.19998	1
4	2	9	1	2	2	6.51059	7.28829	1.30005	1
4	2	9	1	2	4	0	0	0	0
4	2	9	1	2	6	0	0	0	0
4	2	9	1	2	8	0	0	0	0
4	2	9	1	4	2	7.11127	8.18018	2	1
4	2	9	1	4	4	6.51059	7.28829	1.30005	1
4	2	9	1	4	6	5.85031	6.52897	0.90005	1
4	2	9	1	4	8	7.19514	7.49065	0.40005	1
4	2	9	1	6	2	7.11127	8.18018	2.09995	1
4	2	9	1	6	4	7.28591	8.23689	1.99993	1
4	2	9	1	6	6	6.51059	7.28829	1.49999	1
4	2	9	1	6	8	5.81613	6.52282	1.19997	1
4	2	9	1.5	2	2	7.28591	8.23689	1.79999	1
4	2	9	1.5	2	4	6.51059	7.28829	1.19999	1
4	2	9	1.5	2	6	5.81613	6.52282	0.59998	1
4	2	9	1.5	2	8	5.81613	6.52282	0.59998	1
4	2	9	1.5	4	2	7.11127	8.18018	2	1
4	2	9	1.5	4	4	7.28591	8.23689	1.79999	1
4	2	9	1.5	4	6	6.42988	7.28348	1.40001	1
4	2	9	1.5	4	8	6.51059	7.28829	1.30005	1
4	2	9	1.5	6	2	7.11127	8.18018	2.09995	1
4	2	9	1.5	6	4	7.11127	8.18018	2.09995	1
4	2	9	1.5	6	6	7.28591	8.23689	1.99993	1
4	2	9	1.5	6	8	6.98335	7.89197	1.79995	1
4	2	9	2	2	2	7.11127	8.18018	1.90001	1
4	2	9	2	2	4	7.28591	8.23689	1.69993	1
4	2	9	2	2	6	7.00008	7.83856	1.09997	1
4	2	9	2	2	8	5.86395	6.67394	0.79997	1
4	2	9	2	4	2	7.11127	8.18018	2	1
4	2	9	2	4	4	7.11127	8.18018	1.90001	1
4	2	9	2	4	6	7.11127	8.18018	1.90001	1
4	2	9	2	4	8	7.28591	8.23689	1.79999	1
4	2	9	2	6	2	7.11127	8.18018	2.09995	1
4	2	9	2	6	4	7.11127	8.18018	2.09995	1
4	2	9	2	6	6	7.11127	8.18018	2.09995	1
4	2	9	2	6	8	7.11127	8.18018	2.09995	1
4	2	9	2.5	2	2	7.11127	8.18018	1.90001	1
4	2	9	2.5	2	4	7.11127	8.18018	1.79995	1
4	2	9	2.5	2	6	7.11127	8.18018	1.09997	1
4	2	9	2.5	2	8	5.86395	6.67394	0.79997	1
4	2	9	2.5	4	2	7.11127	8.18018	2	1
4	2	9	2.5	4	4	7.11127	8.18018	1.90001	1
4	2	9	2.5	4	6	7.11127	8.18018	1.90001	1
4	2	9	2.5	4	8	7.11127	8.18018	1.90001	1
4	2	9	2.5	6	2	7.11127	8.18018	2.09995	1
4	2	9	2.5	6	4	7.11127	8.18018	2.09995	1
4	2	9	2.5	6	6	7.11127	8.18018	2.09995	1
4	2	9	2.5	6	8	7.11127	8.18018	2.09995	1
4	3	3	1	2	2	5.40147	6.6759	0.10003	1
4	3	3	1	2	4	0	0	0	0
4	3	3	1	2	6	0	0	0	0
4	3	3	1	2	8	0	0	0	0
4	3	3	1	4	2	6.37255	8.16665	1.29999	1
4	3	3	1	4	4	5.40147	6.6759	0.10003	1
4	3	3	1	4	6	0	0	0	0
4	3	3	1	4	8	0	0	0	0
4	3	3	1	6	2	6.37255	8.16665	1.29999	1
4	3	3	1	6	4	5.97703	7.29312	0.50002	1
4	3	3	1	6	6	5.40147	6.6759	0.10003	1
4	3	3	1	6	8	5.12046	6.37852	0	1
4	3	3	1.5	2	2	5.97703	7.29312	0.4	1
4	3	3	1.5	2	4	0	0	0	0
4	3	3	1.5	2	6	0	0	0	0
4	3	3	1.5	2	8	0	0	0	0
4	3	3	1.5	4	2	6.37255	8.16665	1.29999	1
4	3	3	1.5	4	4	5.97703	7.29312	0.4	1
4	3	3	1.5	4	6	5.12046	6.37852	0	1
4	3	3	1.5	4	8	0	0	0	0
4	3	3	1.5	6	2	6.37255	8.16665	1.29999	1
4	3	3	1.5	6	4	6.37255	8.16665	1.29999	1
4	3	3	1.5	6	6	5.97703	7.29312	0.4	1
4	3	3	1.5	6	8	5.32819	6.60373	0.1	1
4	3	3	2	2	2	6.37255	8.16665	0.6	1
4	3	3	2	2	4	5.32819	6.60373	0	1
4	3	3	2	2	6	5.09113	6.31124	0	1
4	3	3	2	2	8	0	0	0	0
4	3	3	2	4	2	6.37255	8.16665	1.29999	1
4	3	3	2	4	4	6.37255	8.16665	0.6	1
4	3	3	2	4	6	5.32819	6.60373	0.1	1
4	3	3	2	4	8	5.32819	6.60373	0	1
4	3	3	2	6	2	6.37255	8.16665	1.29999	1
4	3	3	2	6	4	6.37255	8.16665	1.29999	1
4	3	3	2	6	6	6.37255	8.16665	0.6	1
4	3	3	2	6	8	6.37255	8.16665	0.39998	1
4	3	3	2.5	2	2	6.37255	8.16665	0.6	1
4	3	3	2.5	2	4	5.32819	6.60373	0	1
4	3	3	2.5	2	6	5.09113	6.31124	0	1
4	3	3	2.5	2	8	5.09113	6.31124	0	1
4	3	3	2.5	4	2	6.37255	8.16665	1.29999	1
4	3	3	2.5	4	4	6.37255	8.16665	0.6	1
4	3	3	2.5	4	6	6.37255	8.16665	0.1	1
4	3	3	2.5	4	8	5.32819	6.60373	0	1
4	3	3	2.5	6	2	6.37255	8.16665	1.29999	1
4	3	3	2.5	6	4	6.37255	8.16665	1.29999	1
4	3	3	2.5	6	6	6.37255	8.16665	0.6	1
4	3	3	2.5	6	8	6.37255	8.16665	0.39998	1
4	3	4	1	2	2	6.13561	7.27069	0.4	1
4	3	4	1	2	4	0	0	0	0
4	3	4	1	2	6	0	0	0	0
4	3	4	1	2	8	0	0	0	0
4	3	4	1	4	2	6.21781	7.6512	0.99998	1
4	3	4	1	4	4	6.13561	7.27069	0.4	1
4	3	4	1	4	6	0	0	0	0
4	3	4	1	4	8	0	0	0	0
4	3	4	1	6	2	6.21781	7.6512	0.99998	1
4	3	4	1	6	4	6.21781	7.6512	0.99998	1
4	3	4	1	6	6	6.13561	7.27069	0.4	1
4	3	4	1	6	8	0	0	0	0
4	3	4	1.5	2	2	6.21781	7.6512	0.50002	1
4	3	4	1.5	2	4	0	0	0	0
4	3	4	1.5	2	6	0	0	0	0
4	3	4	1.5	2	8	0	0	0	0
4	3	4	1.5	4	2	6.21781	7.6512	0.99998	1
4	3	4	1.5	4	4	6.21781	7.6512	0.50002	1
4	3	4	1.5	4	6	5.66919	6.80628	0	1
4	3	4	1.5	4	8	0	0	0	0
4	3	4	1.5	6	2	6.21781	7.6512	0.99998	1
4	3	4	1.5	6	4	6.21781	7.6512	0.99998	1
4	3	4	1.5	6	6	6.21781	7.6512	0.50002	1
4	3	4	1.5	6	8	6.068	7.20277	0.30004	1
4	3	4	2	2	2	6.21781	7.6512	0.50002	1
4	3	4	2	2	4	0	0	0	0
4	3	4	2	2	6	0	0	0	0
4	3	4	2	2	8	0	0	0	0
4	3	4	2	4	2	6.21781	7.6512	0.99998	1
4	3	4	2	4	4	6.21781	7.6512	0.50002	1
4	3	4	2	4	6	5.66919	6.80628	0	1
4	3	4	2	4	8	0	0	0	0
4	3	4	2	6	2	6.21781	7.6512	0.99998	1
4	3	4	2	6	4	6.21781	7.6512	0.99998	1
4	3	4	2	6	6	6.21781	7.6512	0.50002	1
4	3	4	2	6	8	6.21781	7.6512	0.30004	1
4	3	4	2.5	2	2	6.21781	7.6512	0.50002	1
4	3	4	2.5	2	4	0	0	0	0
4	3	4	2.5	2	6	0	0	0	0
4	3	4	2.5	2	8	0	0	0	0
4	3	4	2.5	4	2	6.21781	7.6512	0.99998	1
4	3	4	2.5	4	4	6.21781	7.6512	0.50002	1
4	3	4	2.5	4	6	5.66919	6.80628	0	1
4	3	4	2.5	4	8	0	0	0	0
4	3	4	2.5	6	2	6.21781	7.6512	0.99998	1
4	3	4	2.5	6	4	6.21781	7.6512	0.99998	1
4	3	4	2.5	6	6	6.21781	7.6512	0.50002	1
4	3	4	2.5	6	8	6.21781	7.6512	0.30004	1
4	3	5	1	2	2	8.05334	8.77973	0.4	1
4	3	5	1	2	4	0	0	0	0
4	3	5	1	2	6	0	0	0	0
4	3	5	1	2	8	0	0	0	0
4	3	5	1	4	2	5.44522	6.8427	0.90001	1
4	3	5	1	4	4	8.05334	8.77973	0.4	1
4	3	5	1	4	6	0	0	0	0
4	3	5	1	4	8	0	0	0	0
4	3	5	1	6	2	5.44522	6.8427	0.90001	1
4	3	5	1	6	4	5.44522	6.8427	0.90001	1
4	3	5	1	6	6	8.05334	8.77973	0.4	1
4	3	5	1	6	8	0	0	0	0
4	3	5	1.5	2	2	5.44522	6.8427	0.50002	1
4	3	5	1.5	2	4	0	0	0	0
4	3	5	1.5	2	6	0	0	0	0
4	3	5	1.5	2	8	0	0	0	0
4	3	5	1.5	4	2	5.44522	6.8427	0.90001	1
4	3	5	1.5	4	4	5.44522	6.8427	0.50002	1
4	3	5	1.5	4	6	7.71954	8.44817	0.1	1
4	3	5	1.5	4	8	0	0	0	0
4	3	5	1.5	6	2	5.44522	6.8427	0.90001	1
4	3	5	1.5	6	4	5.44522	6.8427	0.90001	1
4	3	5	1.5	6	6	5.44522	6.8427	0.50002	1
4	3	5	1.5	6	8	8.05334	8.77973	0.1	1
4	3	5	2	2	2	5.44522	6.8427	0.50002	1
4	3	5	2	2	4	0	0	0	0
4	3	5	2	2	6	0	0	0	0
4	3	5	2	2	8	0	0	0	0
4	3	5	2	4	2	5.44522	6.8427	0.90001	1
4	3	5	2	4	4	5.44522	6.8427	0.50002	1
4	3	5	2	4	6	7.71954	8.44817	0.1	1
4	3	5	2	4	8	0	0	0	0
4	3	5	2	6	2	5.44522	6.8427	0.90001	1
4	3	5	2	6	4	5.44522	6.8427	0.90001	1
4	3	5	2	6	6	5.44522	6.8427	0.50002	1
4	3	5	2	6	8	5.44522	6.8427	0.1	1
4	3	5	2.5	2	2	5.44522	6.8427	0.50002	1
4	3	5	2.5	2	4	0	0	0	0
4	3	5	2.5	2	6	0	0	0	0
4	3	5	2.5	2	8	0	0	0	0
4	3	5	2.5	4	2	5.44522	6.8427	0.90001	1
4	3	5	2.5	4	4	5.44522	6.8427	0.50002	1
4	3	5	2.5	4	6	7.71954	8.44817	0.1	1
4	3	5	2.5	4	8	0	0	0	0
4	3	5	2.5	6	2	5.44522	6.8427	0.90001	1
4	3	5	2.5	6	4	5.44522	6.8427	0.90001	1
4	3	5	2.5	6	6	5.44522	6.8427	0.50002	1
4	3	5	2.5	6	8	5.44522	6.8427	0.1	1
4	3	6	1	2	2	6.96846	7.90319	0.4	1
4	3	6	1	2	4	0	0	0	0
4	3	6	1	2	6	0	0	0	0
4	3	6	1	2	8	0	0	0	0
4	3	6	1	4	2	5.19701	6.38954	0.80002	1
4	3	6	1	4	4	6.96846	7.90319	0.4	1
4	3	6	1	4	6	0	0	0	0
4	3	6	1	4	8	0	0	0	0
4	3	6	1	6	2	5.19701	6.38954	0.80002	1
4	3	6	1	6	4	5.19701	6.38954	0.80002	1
4	3	6	1	6	6	6.96846	7.90319	0.4	1
4	3	6	1	6	8	10.2707	10.5678	0	1
4	3	6	1.5	2	2	5.19701	6.38954	0.80002	1
4	3	6	1.5	2	4	0	0	0	0
4	3	6	1.5	2	6	0	0	0	0
4	3	6	1.5	2	8	0	0	0	0
4	3	6	1.5	4	2	5.19701	6.38954	0.80002	1
4	3	6	1.5	4	4	5.19701	6.38954	0.80002	1
4	3	6	1.5	4	6	9.06464	9.58845	0	1
4	3	6	1.5	4	8	0	0	0	0
4	3	6	1.5	6	2	5.19701	6.38954	0.80002	1
4	3	6	1.5	6	4	5.19701	6.38954	0.80002	1
4	3	6	1.5	6	6	5.19701	6.38954	0.80002	1
4	3	6	1.5	6	8	9.06464	9.58845	0.30004	1
4	3	6	2	2	2	5.19701	6.38954	0.80002	1
4	3	6	2	2	4	0	0	0	0
4	3	6	2	2	6	0	0	0	0
4	3	6	2	2	8	0	0	0	0
4	3	6	2	4	2	5.19701	6.38954	0.80002	1
4	3	6	2	4	4	5.19701	6.38954	0.80002	1
4	3	6	2	4	6	9.06464	9.58845	0	1
4	3	6	2	4	8	0	0	0	0
4	3	6	2	6	2	5.19701	6.38954	0.80002	1
4	3	6	2	6	4	5.19701	6.38954	0.80002	1
4	3	6	2	6	6	5.19701	6.38954	0.80002	1
4	3	6	2	6	8	5.19701	6.38954	0.30004	1
4	3	6	2.5	2	2	5.19701	6.38954	0.80002	1
4	3	6	2.5	2	4	0	0	0	0
4	3	6	2.5	2	6	0	0	0	0
4	3	6	2.5	2	8	0	0	0	0
4	3	6	2.5	4	2	5.19701	6.38954	0.80002	1
4	3	6	2.5	4	4	5.19701	6.38954	0.80002	1
4	3	6	2.5	4	6	9.06464	9.58845	0	1
4	3	6	2.5	4	8	0	0	0	0
4	3	6	2.5	6	2	5.19701	6.38954	0.80002	1
4	3	6	2.5	6	4	5.19701	6.38954	0.80002	1
4	3	6	2.5	6	6	5.19701	6.38954	0.80002	1
4	3	6	2.5	6	8	5.19701	6.38954	0.30004	1
4	3	7	1	2	2	5.92007	7.05973	0.4	1
4	3	7	1	2	4	0	0	0	0
4	3	7	1	2	6	0	0	0	0
4	3	7	1	2	8	0	0	0	0
4	3	7	1	4	2	4.86704	5.99809	0.69999	1
4	3	7	1	4	4	5.92007	7.05973	0.4	1
4	3	7	1	4	6	0	0	0	0
4	3	7	1	4	8	0	0	0	0
4	3	7	1	6	2	4.86704	5.99809	0.69999	1
4	3	7	1	6	4	4.86704	5.99809	0.69999	1
4	3	7	1	6	6	5.92007	7.05973	0.4	1
4	3	7	1	6	8	10.3555	10.6258	0	1
4	3	7	1.5	2	2	4.86704	5.99809	0.69999	1
4	3	7	1.5	2	4	0	0	0	0
4	3	7	1.5	2	6	0	0	0	0
4	3	7	1.5	2	8	0	0	0	0
4	3	7	1.5	4	2	4.86704	5.99809	0.69999	1
4	3	7	1.5	4	4	4.86704	5.99809	0.69999	1
4	3	7	1.5	4	6	10.3555	10.6258	0.1	1
4	3	7	1.5	4	8	0	0	0	0
4	3	7	1.5	6	2	4.86704	5.99809	0.69999	1
4	3	7	1.5	6	4	4.86704	5.99809	0.69999	1
4	3	7	1.5	6	6	4.86704	5.99809	0.69999	1
4	3	7	1.5	6	8	8.00536	8.72136	0.30004	1
4	3	7	2	2	2	4.86704	5.99809	0.69999	1
4	3	7	2	2	4	0	0	0	0
4	3	7	2	2	6	0	0	0	0
4	3	7	2	2	8	0	0	0	0
4	3	7	2	4	2	4.86704	5.99809	0.69999	1
4	3	7	2	4	4	4.86704	5.99809	0.69999	1
4	3	7	2	4	6	10.3555	10.6258	0.1	1
4	3	7	2	4	8	0	0	0	0
4	3	7	2	6	2	4.86704	5.99809	0.69999	1
4	3	7	2	6	4	4.86704	5.99809	0.69999	1
4	3	7	2	6	6	4.86704	5.99809	0.69999	1
4	3	7	2	6	8	4.86704	5.99809	0.30004	1
4	3	7	2.5	2	2	4.86704	5.99809	0.69999	1
4	3	7	2.5	2	4	0	0	0	0
4	3	7	2.5	2	6	0	0	0	0
4	3	7	2.5	2	8	0	0	0	0
4	3	7	2.5	4	2	4.86704	5.99809	0.69999	1
4	3	7	2.5	4	4	4.86704	5.99809	0.69999	1
4	3	7	2.5	4	6	10.3555	10.6258	0.1	1
4	3	7	2.5	4	8	0	0	0	0
4	3	7	2.5	6	2	4.86704	5.99809	0.69999	1
4	3	7	2.5	6	4	4.86704	5.99809	0.69999	1
4	3	7	2.5	6	6	4.86704	5.99809	0.69999	1
4	3	7	2.5	6	8	4.86704	5.99809	0.30004	1
4	3	8	1	2	2	5.37074	6.55142	0.4	1
4	3	8	1	2	4	0	0	0	0
4	3	8	1	2	6	0	0	0	0
4	3	8	1	2	8	0	0	0	0
4	3	8	1	4	2	4.27404	5.52384	0.60003	1
4	3	8	1	4	4	5.37074	6.55142	0.4	1
4	3	8	1	4	6	0	0	0	0
4	3	8	1	4	8	0	0	0	0
4	3	8	1	6	2	4.27404	5.52384	0.60003	1
4	3	8	1	6	4	4.27404	5.52384	0.60003	1
4	3	8	1	6	6	5.37074	6.55142	0.4	1
4	3	8	1	6	8	9.61741	10.0042	0.1	1
4	3	8	1.5	2	2	4.27404	5.52384	0.60003	1
4	3	8	1.5	2	4	0	0	0	0
4	3	8	1.5	2	6	0	0	0	0
4	3	8	1.5	2	8	0	0	0	0
4	3	8	1.5	4	2	4.27404	5.52384	0.60003	1
4	3	8	1.5	4	4	4.27404	5.52384	0.60003	1
4	3	8	1.5	4	6	9.61741	10.0042	0.1	1
4	3	8	1.5	4	8	0	0	0	0
4	3	8	1.5	6	2	4.27404	5.52384	0.60003	1
4	3	8	1.5	6	4	4.27404	5.52384	0.60003	1
4	3	8	1.5	6	6	4.27404	5.52384	0.60003	1
4	3	8	1.5	6	8	6.9573	7.87398	0.30004	1
4	3	8	2	2	2	4.27404	5.52384	0.60003	1
4	3	8	2	2	4	0	0	0	0
4	3	8	2	2	6	0	0	0	0
4	3	8	2	2	8	0	0	0	0
4	3	8	2	4	2	4.27404	5.52384	0.60003	1
4	3	8	2	4	4	4.27404	5.52384	0.60003	1
4	3	8	2	4	6	9.61741	10.0042	0.1	1
4	3	8	2	4	8	0	0	0	0
4	3	8	2	6	2	4.27404	5.52384	0.60003	1
4	3	8	2	6	4	4.27404	5.52384	0.60003	1
4	3	8	2	6	6	4.27404	5.52384	0.60003	1
4	3	8	2	6	8	6.9573	7.87398	0.30004	1
4	3	8	2.5	2	2	4.27404	5.52384	0.60003	1
4	3	8	2.5	2	4	0	0	0	0
4	3	8	2.5	2	6	0	0	0	0
4	3	8	2.5	2	8	0	0	0	0
4	3	8	2.5	4	2	4.27404	5.52384	0.60003	1
4	3	8	2.5	4	4	4.27404	5.52384	0.60003	1
4	3	8	2.5	4	6	9.61741	10.0042	0.1	1
4	3	8	2.5	4	8	0	0	0	0
4	3	8	2.5	6	2	4.27404	5.52384	0.60003	1
4	3	8	2.5	6	4	4.27404	5.52384	0.60003	1
4	3	8	2.5	6	6	4.27404	5.52384	0.60003	1
4	3	8	2.5	6	8	6.9573	7.87398	0.30004	1
4	3	9	1	2	2	4.72857	6.00256	0.4	1
4	3	9	1	2	4	0	0	0	0
4	3	9	1	2	6	0	0	0	0
4	3	9	1	2	8	0	0	0	0
4	3	9	1	4	2	4.33303	5.51657	0.50002	1
4	3	9	1	4	4	4.72857	6.00256	0.4	1
4	3	9	1	4	6	0	0	0	0
4	3	9	1	4	8	0	0	0	0
4	3	9	1	6	2	4.33303	5.51657	0.50002	1
4	3	9	1	6	4	4.33303	5.51657	0.50002	1
4	3	9	1	6	6	4.72857	6.00256	0.4	1
4	3	9	1	6	8	8.80332	9.32935	0.1	1
4	3	9	1.5	2	2	4.33303	5.51657	0.50002	1
4	3	9	1.5	2	4	0	0	0	0
4	3	9	1.5	2	6	0	0	0	0
4	3	9	1.5	2	8	0	0	0	0
4	3	9	1.5	4	2	4.33303	5.51657	0.50002	1
4	3	9	1.5	4	4	4.33303	5.51657	0.50002	1
4	3	9	1.5	4	6	0	0	0	0
4	3	9	1.5	4	8	0	0	0	0
4	3	9	1.5	6	2	4.33303	5.51657	0.50002	1
4	3	9	1.5	6	4	4.33303	5.51657	0.50002	1
4	3	9	1.5	6	6	4.33303	5.51657	0.50002	1
4	3	9	1.5	6	8	6.06541	7.12347	0.1	1
4	3	9	2	2	2	4.33303	5.51657	0.50002	1
4	3	9	2	2	4	0	0	0	0
4	3	9	2	2	6	0	0	0	0
4	3	9	2	2	8	0	0	0	0
4	3	9	2	4	2	4.33303	5.51657	0.50002	1
4	3	9	2	4	4	4.33303	5.51657	0.50002	1
4	3	9	2	4	6	0	0	0	0
4	3	9	2	4	8	0	0	0	0
4	3	9	2	6	2	4.33303	5.51657	0.50002	1
4	3	9	2	6	4	4.33303	5.51657	0.50002	1
4	3	9	2	6	6	4.33303	5.51657	0.50002	1
4	3	9	2	6	8	6.06541	7.12347	0.1	1
4	3	9	2.5	2	2	4.33303	5.51657	0.50002	1
4	3	9	2.5	2	4	0	0	0	0
4	3	9	2.5	2	6	0	0	0	0
4	3	9	2.5	2	8	0	0	0	0
4	3	9	2.5	4	2	4.33303	5.51657	0.50002	1
4	3	9	2.5	4	4	4.33303	5.51657	0.50002	1
4	3	9	2.5	4	6	0	0	0	0
4	3	9	2.5	4	8	0	0	0	0
4	3	9	2.5	6	2	4.33303	5.51657	0.50002	1
4	3	9	2.5	6	4	4.33303	5.51657	0.50002	1
4	3	9	2.5	6	6	4.33303	5.51657	0.50002	1
4	3	9	2.5	6	8	6.06541	7.12347	0.1	1
