# Supplementary material
Source: MDPI journal article supplement (https://www.mdpi.com/2072-4292/15/6/1512)
Supplement: s1 [file s1 › Parameter tuning improved method.xlsx]

## Sheet: Flight 1
FLIGHT Nr.	Encounter	Braking time shift [s]	Position sigma multiplier	Velocity sigma multiplier	THS	FF case (0) / EE case (1) / FE case (2)	Distance with the considered braking [m]	DNT (maxT) [s]	Safe (0), Danger (1)
1	1	-0.2	1	1	0	0	0	0	0
1	1	-0.2	1	1	0.1	0	0	0	0
1	1	-0.2	1	1	0.2	0	0	0	0
1	1	-0.2	1	1	0.3	0	0	0	0
1	1	-0.2	1	1	0.4	0	0	0	0
1	1	-0.2	1	1	0.5	0	0	0	0
1	1	-0.2	1	2	0	0	0	0	0
1	1	-0.2	1	2	0.1	0	0	0	0
1	1	-0.2	1	2	0.2	0	0	0	0
1	1	-0.2	1	2	0.3	0	0	0	0
1	1	-0.2	1	2	0.4	0	0	0	0
1	1	-0.2	1	2	0.5	0	0	0	0
1	1	-0.2	1	3	0	0	-1.78432	2.39923	1
1	1	-0.2	1	3	0.1	0	0	0	0
1	1	-0.2	1	3	0.2	0	0	0	0
1	1	-0.2	1	3	0.3	0	0	0	0
1	1	-0.2	1	3	0.4	0	0	0	0
1	1	-0.2	1	3	0.5	0	0	0	0
1	1	-0.2	2	1	0	0	0	0	0
1	1	-0.2	2	1	0.1	0	0	0	0
1	1	-0.2	2	1	0.2	0	0	0	0
1	1	-0.2	2	1	0.3	0	0	0	0
1	1	-0.2	2	1	0.4	0	0	0	0
1	1	-0.2	2	1	0.5	0	0	0	0
1	1	-0.2	2	2	0	0	0	0	0
1	1	-0.2	2	2	0.1	0	0	0	0
1	1	-0.2	2	2	0.2	0	0	0	0
1	1	-0.2	2	2	0.3	0	0	0	0
1	1	-0.2	2	2	0.4	0	0	0	0
1	1	-0.2	2	2	0.5	0	0	0	0
1	1	-0.2	2	3	0	0	-0.807813	2.99907	1
1	1	-0.2	2	3	0.1	0	-2.0076	1.09964	1
1	1	-0.2	2	3	0.2	0	0	0	0
1	1	-0.2	2	3	0.3	0	0	0	0
1	1	-0.2	2	3	0.4	0	0	0	0
1	1	-0.2	2	3	0.5	0	0	0	0
1	1	-0.2	3	1	0	0	0	0	0
1	1	-0.2	3	1	0.1	0	0	0	0
1	1	-0.2	3	1	0.2	0	0	0	0
1	1	-0.2	3	1	0.3	0	0	0	0
1	1	-0.2	3	1	0.4	0	0	0	0
1	1	-0.2	3	1	0.5	0	0	0	0
1	1	-0.2	3	2	0	0	0	0	0
1	1	-0.2	3	2	0.1	0	0	0	0
1	1	-0.2	3	2	0.2	0	0	0	0
1	1	-0.2	3	2	0.3	0	0	0	0
1	1	-0.2	3	2	0.4	0	0	0	0
1	1	-0.2	3	2	0.5	0	0	0	0
1	1	-0.2	3	3	0	0	0.0695837	3.39894	1
1	1	-0.2	3	3	0.1	0	-1.78432	2.69912	1
1	1	-0.2	3	3	0.2	0	0	0	0
1	1	-0.2	3	3	0.3	0	0	0	0
1	1	-0.2	3	3	0.4	0	0	0	0
1	1	-0.2	3	3	0.5	0	0	0	0
1	1	-0.1	1	1	0	0	0	0	0
1	1	-0.1	1	1	0.1	0	0	0	0
1	1	-0.1	1	1	0.2	0	0	0	0
1	1	-0.1	1	1	0.3	0	0	0	0
1	1	-0.1	1	1	0.4	0	0	0	0
1	1	-0.1	1	1	0.5	0	0	0	0
1	1	-0.1	1	2	0	0	0	0	0
1	1	-0.1	1	2	0.1	0	0	0	0
1	1	-0.1	1	2	0.2	0	0	0	0
1	1	-0.1	1	2	0.3	0	0	0	0
1	1	-0.1	1	2	0.4	0	0	0	0
1	1	-0.1	1	2	0.5	0	0	0	0
1	1	-0.1	1	3	0	0	0.0695837	3.29897	1
1	1	-0.1	1	3	0.1	0	-1.30863	2.49919	1
1	1	-0.1	1	3	0.2	0	0	0	0
1	1	-0.1	1	3	0.3	0	0	0	0
1	1	-0.1	1	3	0.4	0	0	0	0
1	1	-0.1	1	3	0.5	0	0	0	0
1	1	-0.1	2	1	0	0	0	0	0
1	1	-0.1	2	1	0.1	0	0	0	0
1	1	-0.1	2	1	0.2	0	0	0	0
1	1	-0.1	2	1	0.3	0	0	0	0
1	1	-0.1	2	1	0.4	0	0	0	0
1	1	-0.1	2	1	0.5	0	0	0	0
1	1	-0.1	2	2	0	0	0	0	0
1	1	-0.1	2	2	0.1	0	0	0	0
1	1	-0.1	2	2	0.2	0	0	0	0
1	1	-0.1	2	2	0.3	0	0	0	0
1	1	-0.1	2	2	0.4	0	0	0	0
1	1	-0.1	2	2	0.5	0	0	0	0
1	1	-0.1	2	3	0	0	0.0695837	3.29897	1
1	1	-0.1	2	3	0.1	0	-0.807813	2.99907	1
1	1	-0.1	2	3	0.2	0	0	0	0
1	1	-0.1	2	3	0.3	0	0	0	0
1	1	-0.1	2	3	0.4	0	0	0	0
1	1	-0.1	2	3	0.5	0	0	0	0
1	1	-0.1	3	1	0	0	0	0	0
1	1	-0.1	3	1	0.1	0	0	0	0
1	1	-0.1	3	1	0.2	0	0	0	0
1	1	-0.1	3	1	0.3	0	0	0	0
1	1	-0.1	3	1	0.4	0	0	0	0
1	1	-0.1	3	1	0.5	0	0	0	0
1	1	-0.1	3	2	0	0	0	0	0
1	1	-0.1	3	2	0.1	0	0	0	0
1	1	-0.1	3	2	0.2	0	0	0	0
1	1	-0.1	3	2	0.3	0	0	0	0
1	1	-0.1	3	2	0.4	0	0	0	0
1	1	-0.1	3	2	0.5	0	0	0	0
1	1	-0.1	3	3	0	0	0.0695837	3.39894	1
1	1	-0.1	3	3	0.1	0	0.0695837	3.29897	1
1	1	-0.1	3	3	0.2	0	-1.78432	2.49923	1
1	1	-0.1	3	3	0.3	0	0	0	0
1	1	-0.1	3	3	0.4	0	0	0	0
1	1	-0.1	3	3	0.5	0	0	0	0
1	1	0	1	1	0	0	0	0	0
1	1	0	1	1	0.1	0	0	0	0
1	1	0	1	1	0.2	0	0	0	0
1	1	0	1	1	0.3	0	0	0	0
1	1	0	1	1	0.4	0	0	0	0
1	1	0	1	1	0.5	0	0	0	0
1	1	0	1	2	0	0	0	0	0
1	1	0	1	2	0.1	0	0	0	0
1	1	0	1	2	0.2	0	0	0	0
1	1	0	1	2	0.3	0	0	0	0
1	1	0	1	2	0.4	0	0	0	0
1	1	0	1	2	0.5	0	0	0	0
1	1	0	1	3	0	0	0.0695837	3.29897	1
1	1	0	1	3	0.1	0	0.0695837	3.199	1
1	1	0	1	3	0.2	0	-1.78432	2.39923	1
1	1	0	1	3	0.3	0	0	0	0
1	1	0	1	3	0.4	0	0	0	0
1	1	0	1	3	0.5	0	0	0	0
1	1	0	2	1	0	0	0	0	0
1	1	0	2	1	0.1	0	0	0	0
1	1	0	2	1	0.2	0	0	0	0
1	1	0	2	1	0.3	0	0	0	0
1	1	0	2	1	0.4	0	0	0	0
1	1	0	2	1	0.5	0	0	0	0
1	1	0	2	2	0	0	0	0	0
1	1	0	2	2	0.1	0	0	0	0
1	1	0	2	2	0.2	0	0	0	0
1	1	0	2	2	0.3	0	0	0	0
1	1	0	2	2	0.4	0	0	0	0
1	1	0	2	2	0.5	0	0	0	0
1	1	0	2	3	0	0	0.543605	3.4989	1
1	1	0	2	3	0.1	0	0.0695837	3.29897	1
1	1	0	2	3	0.2	0	-0.807813	2.79913	1
1	1	0	2	3	0.3	0	0	0	0
1	1	0	2	3	0.4	0	0	0	0
1	1	0	2	3	0.5	0	0	0	0
1	1	0	3	1	0	0	0	0	0
1	1	0	3	1	0.1	0	0	0	0
1	1	0	3	1	0.2	0	0	0	0
1	1	0	3	1	0.3	0	0	0	0
1	1	0	3	1	0.4	0	0	0	0
1	1	0	3	1	0.5	0	0	0	0
1	1	0	3	2	0	0	-2.25291	1.09963	1
1	1	0	3	2	0.1	0	0	0	0
1	1	0	3	2	0.2	0	0	0	0
1	1	0	3	2	0.3	0	0	0	0
1	1	0	3	2	0.4	0	0	0	0
1	1	0	3	2	0.5	0	0	0	0
1	1	0	3	3	0	0	0.543605	3.59887	1
1	1	0	3	3	0.1	0	0.0695837	3.39894	1
1	1	0	3	3	0.2	0	-0.807813	2.99907	1
1	1	0	3	3	0.3	0	0	0	0
1	1	0	3	3	0.4	0	0	0	0
1	1	0	3	3	0.5	0	0	0	0
1	1	0.1	1	1	0	0	0	0	0
1	1	0.1	1	1	0.1	0	0	0	0
1	1	0.1	1	1	0.2	0	0	0	0
1	1	0.1	1	1	0.3	0	0	0	0
1	1	0.1	1	1	0.4	0	0	0	0
1	1	0.1	1	1	0.5	0	0	0	0
1	1	0.1	1	2	0	0	0	0	0
1	1	0.1	1	2	0.1	0	0	0	0
1	1	0.1	1	2	0.2	0	0	0	0
1	1	0.1	1	2	0.3	0	0	0	0
1	1	0.1	1	2	0.4	0	0	0	0
1	1	0.1	1	2	0.5	0	0	0	0
1	1	0.1	1	3	0	0	0.543605	3.4989	1
1	1	0.1	1	3	0.1	0	0.0695837	3.29897	1
1	1	0.1	1	3	0.2	0	0.0695837	3.099	1
1	1	0.1	1	3	0.3	0	0	0	0
1	1	0.1	1	3	0.4	0	0	0	0
1	1	0.1	1	3	0.5	0	0	0	0
1	1	0.1	2	1	0	0	0	0	0
1	1	0.1	2	1	0.1	0	0	0	0
1	1	0.1	2	1	0.2	0	0	0	0
1	1	0.1	2	1	0.3	0	0	0	0
1	1	0.1	2	1	0.4	0	0	0	0
1	1	0.1	2	1	0.5	0	0	0	0
1	1	0.1	2	2	0	0	-1.30863	2.59919	1
1	1	0.1	2	2	0.1	0	0	0	0
1	1	0.1	2	2	0.2	0	0	0	0
1	1	0.1	2	2	0.3	0	0	0	0
1	1	0.1	2	2	0.4	0	0	0	0
1	1	0.1	2	2	0.5	0	0	0	0
1	1	0.1	2	3	0	0	1.06002	3.69886	1
1	1	0.1	2	3	0.1	0	0.543605	3.4989	1
1	1	0.1	2	3	0.2	0	0.0695837	3.199	1
1	1	0.1	2	3	0.3	0	-0.807813	2.69918	1
1	1	0.1	2	3	0.4	0	0	0	0
1	1	0.1	2	3	0.5	0	0	0	0
1	1	0.1	3	1	0	0	0	0	0
1	1	0.1	3	1	0.1	0	0	0	0
1	1	0.1	3	1	0.2	0	0	0	0
1	1	0.1	3	1	0.3	0	0	0	0
1	1	0.1	3	1	0.4	0	0	0	0
1	1	0.1	3	1	0.5	0	0	0	0
1	1	0.1	3	2	0	0	-0.807813	2.99907	1
1	1	0.1	3	2	0.1	0	-1.67045	0.99969	1
1	1	0.1	3	2	0.2	0	0	0	0
1	1	0.1	3	2	0.3	0	0	0	0
1	1	0.1	3	2	0.4	0	0	0	0
1	1	0.1	3	2	0.5	0	0	0	0
1	1	0.1	3	3	0	0	1.06002	3.79886	1
1	1	0.1	3	3	0.1	0	0.543605	3.4989	1
1	1	0.1	3	3	0.2	0	0.0695837	3.29897	1
1	1	0.1	3	3	0.3	0	-0.807813	2.89907	1
1	1	0.1	3	3	0.4	0	0	0	0
1	1	0.1	3	3	0.5	0	0	0	0
1	1	0.2	1	1	0	0	0	0	0
1	1	0.2	1	1	0.1	0	0	0	0
1	1	0.2	1	1	0.2	0	0	0	0
1	1	0.2	1	1	0.3	0	0	0	0
1	1	0.2	1	1	0.4	0	0	0	0
1	1	0.2	1	1	0.5	0	0	0	0
1	1	0.2	1	2	0	0	-0.807813	2.69918	1
1	1	0.2	1	2	0.1	0	0	0	0
1	1	0.2	1	2	0.2	0	0	0	0
1	1	0.2	1	2	0.3	0	0	0	0
1	1	0.2	1	2	0.4	0	0	0	0
1	1	0.2	1	2	0.5	0	0	0	0
1	1	0.2	1	3	0	0	1.06002	3.59889	1
1	1	0.2	1	3	0.1	0	0.543605	3.39893	1
1	1	0.2	1	3	0.2	0	0.0695837	3.199	1
1	1	0.2	1	3	0.3	0	-0.807813	2.69918	1
1	1	0.2	1	3	0.4	0	0	0	0
1	1	0.2	1	3	0.5	0	0	0	0
1	1	0.2	2	1	0	0	0	0	0
1	1	0.2	2	1	0.1	0	0	0	0
1	1	0.2	2	1	0.2	0	0	0	0
1	1	0.2	2	1	0.3	0	0	0	0
1	1	0.2	2	1	0.4	0	0	0	0
1	1	0.2	2	1	0.5	0	0	0	0
1	1	0.2	2	2	0	0	0.0695837	3.099	1
1	1	0.2	2	2	0.1	0	-0.807813	1.19964	1
1	1	0.2	2	2	0.2	0	0	0	0
1	1	0.2	2	2	0.3	0	0	0	0
1	1	0.2	2	2	0.4	0	0	0	0
1	1	0.2	2	2	0.5	0	0	0	0
1	1	0.2	2	3	0	0	1.70305	3.89885	1
1	1	0.2	2	3	0.1	0	1.06002	3.59889	1
1	1	0.2	2	3	0.2	0	0.0695837	3.29897	1
1	1	0.2	2	3	0.3	0	0.0695837	3.099	1
1	1	0.2	2	3	0.4	0	0	0	0
1	1	0.2	2	3	0.5	0	0	0	0
1	1	0.2	3	1	0	0	0	0	0
1	1	0.2	3	1	0.1	0	0	0	0
1	1	0.2	3	1	0.2	0	0	0	0
1	1	0.2	3	1	0.3	0	0	0	0
1	1	0.2	3	1	0.4	0	0	0	0
1	1	0.2	3	1	0.5	0	0	0	0
1	1	0.2	3	2	0	0	0.0695837	3.29897	1
1	1	0.2	3	2	0.1	0	-0.807813	2.89907	1
1	1	0.2	3	2	0.2	0	0	0	0
1	1	0.2	3	2	0.3	0	0	0	0
1	1	0.2	3	2	0.4	0	0	0	0
1	1	0.2	3	2	0.5	0	0	0	0
1	1	0.2	3	3	0	0	2.40008	4.09869	1
1	1	0.2	3	3	0.1	0	1.06002	3.59889	1
1	1	0.2	3	3	0.2	0	0.543605	3.39893	1
1	1	0.2	3	3	0.3	0	0.0695837	3.199	1
1	1	0.2	3	3	0.4	0	-0.807813	1.19964	1
1	1	0.2	3	3	0.5	0	0	0	0
1	1	-0.2	1	1	0	1	0	0	0
1	1	-0.2	1	1	0.1	1	0	0	0
1	1	-0.2	1	1	0.2	1	0	0	0
1	1	-0.2	1	1	0.3	1	0	0	0
1	1	-0.2	1	1	0.4	1	0	0	0
1	1	-0.2	1	1	0.5	1	0	0	0
1	1	-0.2	1	2	0	1	0	0	0
1	1	-0.2	1	2	0.1	1	0	0	0
1	1	-0.2	1	2	0.2	1	0	0	0
1	1	-0.2	1	2	0.3	1	0	0	0
1	1	-0.2	1	2	0.4	1	0	0	0
1	1	-0.2	1	2	0.5	1	0	0	0
1	1	-0.2	1	3	0	1	0	0	0
1	1	-0.2	1	3	0.1	1	0	0	0
1	1	-0.2	1	3	0.2	1	0	0	0
1	1	-0.2	1	3	0.3	1	0	0	0
1	1	-0.2	1	3	0.4	1	0	0	0
1	1	-0.2	1	3	0.5	1	0	0	0
1	1	-0.2	2	1	0	1	0	0	0
1	1	-0.2	2	1	0.1	1	0	0	0
1	1	-0.2	2	1	0.2	1	0	0	0
1	1	-0.2	2	1	0.3	1	0	0	0
1	1	-0.2	2	1	0.4	1	0	0	0
1	1	-0.2	2	1	0.5	1	0	0	0
1	1	-0.2	2	2	0	1	0	0	0
1	1	-0.2	2	2	0.1	1	0	0	0
1	1	-0.2	2	2	0.2	1	0	0	0
1	1	-0.2	2	2	0.3	1	0	0	0
1	1	-0.2	2	2	0.4	1	0	0	0
1	1	-0.2	2	2	0.5	1	0	0	0
1	1	-0.2	2	3	0	1	0	0	0
1	1	-0.2	2	3	0.1	1	0	0	0
1	1	-0.2	2	3	0.2	1	0	0	0
1	1	-0.2	2	3	0.3	1	0	0	0
1	1	-0.2	2	3	0.4	1	0	0	0
1	1	-0.2	2	3	0.5	1	0	0	0
1	1	-0.2	3	1	0	1	0	0	0
1	1	-0.2	3	1	0.1	1	0	0	0
1	1	-0.2	3	1	0.2	1	0	0	0
1	1	-0.2	3	1	0.3	1	0	0	0
1	1	-0.2	3	1	0.4	1	0	0	0
1	1	-0.2	3	1	0.5	1	0	0	0
1	1	-0.2	3	2	0	1	0	0	0
1	1	-0.2	3	2	0.1	1	0	0	0
1	1	-0.2	3	2	0.2	1	0	0	0
1	1	-0.2	3	2	0.3	1	0	0	0
1	1	-0.2	3	2	0.4	1	0	0	0
1	1	-0.2	3	2	0.5	1	0	0	0
1	1	-0.2	3	3	0	1	0	0	0
1	1	-0.2	3	3	0.1	1	0	0	0
1	1	-0.2	3	3	0.2	1	0	0	0
1	1	-0.2	3	3	0.3	1	0	0	0
1	1	-0.2	3	3	0.4	1	0	0	0
1	1	-0.2	3	3	0.5	1	0	0	0
1	1	-0.1	1	1	0	1	0	0	0
1	1	-0.1	1	1	0.1	1	0	0	0
1	1	-0.1	1	1	0.2	1	0	0	0
1	1	-0.1	1	1	0.3	1	0	0	0
1	1	-0.1	1	1	0.4	1	0	0	0
1	1	-0.1	1	1	0.5	1	0	0	0
1	1	-0.1	1	2	0	1	0	0	0
1	1	-0.1	1	2	0.1	1	0	0	0
1	1	-0.1	1	2	0.2	1	0	0	0
1	1	-0.1	1	2	0.3	1	0	0	0
1	1	-0.1	1	2	0.4	1	0	0	0
1	1	-0.1	1	2	0.5	1	0	0	0
1	1	-0.1	1	3	0	1	0	0	0
1	1	-0.1	1	3	0.1	1	0	0	0
1	1	-0.1	1	3	0.2	1	0	0	0
1	1	-0.1	1	3	0.3	1	0	0	0
1	1	-0.1	1	3	0.4	1	0	0	0
1	1	-0.1	1	3	0.5	1	0	0	0
1	1	-0.1	2	1	0	1	0	0	0
1	1	-0.1	2	1	0.1	1	0	0	0
1	1	-0.1	2	1	0.2	1	0	0	0
1	1	-0.1	2	1	0.3	1	0	0	0
1	1	-0.1	2	1	0.4	1	0	0	0
1	1	-0.1	2	1	0.5	1	0	0	0
1	1	-0.1	2	2	0	1	0	0	0
1	1	-0.1	2	2	0.1	1	0	0	0
1	1	-0.1	2	2	0.2	1	0	0	0
1	1	-0.1	2	2	0.3	1	0	0	0
1	1	-0.1	2	2	0.4	1	0	0	0
1	1	-0.1	2	2	0.5	1	0	0	0
1	1	-0.1	2	3	0	1	0	0	0
1	1	-0.1	2	3	0.1	1	0	0	0
1	1	-0.1	2	3	0.2	1	0	0	0
1	1	-0.1	2	3	0.3	1	0	0	0
1	1	-0.1	2	3	0.4	1	0	0	0
1	1	-0.1	2	3	0.5	1	0	0	0
1	1	-0.1	3	1	0	1	0	0	0
1	1	-0.1	3	1	0.1	1	0	0	0
1	1	-0.1	3	1	0.2	1	0	0	0
1	1	-0.1	3	1	0.3	1	0	0	0
1	1	-0.1	3	1	0.4	1	0	0	0
1	1	-0.1	3	1	0.5	1	0	0	0
1	1	-0.1	3	2	0	1	0	0	0
1	1	-0.1	3	2	0.1	1	0	0	0
1	1	-0.1	3	2	0.2	1	0	0	0
1	1	-0.1	3	2	0.3	1	0	0	0
1	1	-0.1	3	2	0.4	1	0	0	0
1	1	-0.1	3	2	0.5	1	0	0	0
1	1	-0.1	3	3	0	1	0	0	0
1	1	-0.1	3	3	0.1	1	0	0	0
1	1	-0.1	3	3	0.2	1	0	0	0
1	1	-0.1	3	3	0.3	1	0	0	0
1	1	-0.1	3	3	0.4	1	0	0	0
1	1	-0.1	3	3	0.5	1	0	0	0
1	1	0	1	1	0	1	0	0	0
1	1	0	1	1	0.1	1	0	0	0
1	1	0	1	1	0.2	1	0	0	0
1	1	0	1	1	0.3	1	0	0	0
1	1	0	1	1	0.4	1	0	0	0
1	1	0	1	1	0.5	1	0	0	0
1	1	0	1	2	0	1	0	0	0
1	1	0	1	2	0.1	1	0	0	0
1	1	0	1	2	0.2	1	0	0	0
1	1	0	1	2	0.3	1	0	0	0
1	1	0	1	2	0.4	1	0	0	0
1	1	0	1	2	0.5	1	0	0	0
1	1	0	1	3	0	1	0	0	0
1	1	0	1	3	0.1	1	0	0	0
1	1	0	1	3	0.2	1	0	0	0
1	1	0	1	3	0.3	1	0	0	0
1	1	0	1	3	0.4	1	0	0	0
1	1	0	1	3	0.5	1	0	0	0
1	1	0	2	1	0	1	0	0	0
1	1	0	2	1	0.1	1	0	0	0
1	1	0	2	1	0.2	1	0	0	0
1	1	0	2	1	0.3	1	0	0	0
1	1	0	2	1	0.4	1	0	0	0
1	1	0	2	1	0.5	1	0	0	0
1	1	0	2	2	0	1	0	0	0
1	1	0	2	2	0.1	1	0	0	0
1	1	0	2	2	0.2	1	0	0	0
1	1	0	2	2	0.3	1	0	0	0
1	1	0	2	2	0.4	1	0	0	0
1	1	0	2	2	0.5	1	0	0	0
1	1	0	2	3	0	1	0	0	0
1	1	0	2	3	0.1	1	0	0	0
1	1	0	2	3	0.2	1	0	0	0
1	1	0	2	3	0.3	1	0	0	0
1	1	0	2	3	0.4	1	0	0	0
1	1	0	2	3	0.5	1	0	0	0
1	1	0	3	1	0	1	0	0	0
1	1	0	3	1	0.1	1	0	0	0
1	1	0	3	1	0.2	1	0	0	0
1	1	0	3	1	0.3	1	0	0	0
1	1	0	3	1	0.4	1	0	0	0
1	1	0	3	1	0.5	1	0	0	0
1	1	0	3	2	0	1	0	0	0
1	1	0	3	2	0.1	1	0	0	0
1	1	0	3	2	0.2	1	0	0	0
1	1	0	3	2	0.3	1	0	0	0
1	1	0	3	2	0.4	1	0	0	0
1	1	0	3	2	0.5	1	0	0	0
1	1	0	3	3	0	1	0	0	0
1	1	0	3	3	0.1	1	0	0	0
1	1	0	3	3	0.2	1	0	0	0
1	1	0	3	3	0.3	1	0	0	0
1	1	0	3	3	0.4	1	0	0	0
1	1	0	3	3	0.5	1	0	0	0
1	1	0.1	1	1	0	1	0	0	0
1	1	0.1	1	1	0.1	1	0	0	0
1	1	0.1	1	1	0.2	1	0	0	0
1	1	0.1	1	1	0.3	1	0	0	0
1	1	0.1	1	1	0.4	1	0	0	0
1	1	0.1	1	1	0.5	1	0	0	0
1	1	0.1	1	2	0	1	0	0	0
1	1	0.1	1	2	0.1	1	0	0	0
1	1	0.1	1	2	0.2	1	0	0	0
1	1	0.1	1	2	0.3	1	0	0	0
1	1	0.1	1	2	0.4	1	0	0	0
1	1	0.1	1	2	0.5	1	0	0	0
1	1	0.1	1	3	0	1	0	0	0
1	1	0.1	1	3	0.1	1	0	0	0
1	1	0.1	1	3	0.2	1	0	0	0
1	1	0.1	1	3	0.3	1	0	0	0
1	1	0.1	1	3	0.4	1	0	0	0
1	1	0.1	1	3	0.5	1	0	0	0
1	1	0.1	2	1	0	1	0	0	0
1	1	0.1	2	1	0.1	1	0	0	0
1	1	0.1	2	1	0.2	1	0	0	0
1	1	0.1	2	1	0.3	1	0	0	0
1	1	0.1	2	1	0.4	1	0	0	0
1	1	0.1	2	1	0.5	1	0	0	0
1	1	0.1	2	2	0	1	0	0	0
1	1	0.1	2	2	0.1	1	0	0	0
1	1	0.1	2	2	0.2	1	0	0	0
1	1	0.1	2	2	0.3	1	0	0	0
1	1	0.1	2	2	0.4	1	0	0	0
1	1	0.1	2	2	0.5	1	0	0	0
1	1	0.1	2	3	0	1	0	0	0
1	1	0.1	2	3	0.1	1	0	0	0
1	1	0.1	2	3	0.2	1	0	0	0
1	1	0.1	2	3	0.3	1	0	0	0
1	1	0.1	2	3	0.4	1	0	0	0
1	1	0.1	2	3	0.5	1	0	0	0
1	1	0.1	3	1	0	1	0	0	0
1	1	0.1	3	1	0.1	1	0	0	0
1	1	0.1	3	1	0.2	1	0	0	0
1	1	0.1	3	1	0.3	1	0	0	0
1	1	0.1	3	1	0.4	1	0	0	0
1	1	0.1	3	1	0.5	1	0	0	0
1	1	0.1	3	2	0	1	0	0	0
1	1	0.1	3	2	0.1	1	0	0	0
1	1	0.1	3	2	0.2	1	0	0	0
1	1	0.1	3	2	0.3	1	0	0	0
1	1	0.1	3	2	0.4	1	0	0	0
1	1	0.1	3	2	0.5	1	0	0	0
1	1	0.1	3	3	0	1	0	0	0
1	1	0.1	3	3	0.1	1	0	0	0
1	1	0.1	3	3	0.2	1	0	0	0
1	1	0.1	3	3	0.3	1	0	0	0
1	1	0.1	3	3	0.4	1	0	0	0
1	1	0.1	3	3	0.5	1	0	0	0
1	1	0.2	1	1	0	1	0	0	0
1	1	0.2	1	1	0.1	1	0	0	0
1	1	0.2	1	1	0.2	1	0	0	0
1	1	0.2	1	1	0.3	1	0	0	0
1	1	0.2	1	1	0.4	1	0	0	0
1	1	0.2	1	1	0.5	1	0	0	0
1	1	0.2	1	2	0	1	0	0	0
1	1	0.2	1	2	0.1	1	0	0	0
1	1	0.2	1	2	0.2	1	0	0	0
1	1	0.2	1	2	0.3	1	0	0	0
1	1	0.2	1	2	0.4	1	0	0	0
1	1	0.2	1	2	0.5	1	0	0	0
1	1	0.2	1	3	0	1	0	0	0
1	1	0.2	1	3	0.1	1	0	0	0
1	1	0.2	1	3	0.2	1	0	0	0
1	1	0.2	1	3	0.3	1	0	0	0
1	1	0.2	1	3	0.4	1	0	0	0
1	1	0.2	1	3	0.5	1	0	0	0
1	1	0.2	2	1	0	1	0	0	0
1	1	0.2	2	1	0.1	1	0	0	0
1	1	0.2	2	1	0.2	1	0	0	0
1	1	0.2	2	1	0.3	1	0	0	0
1	1	0.2	2	1	0.4	1	0	0	0
1	1	0.2	2	1	0.5	1	0	0	0
1	1	0.2	2	2	0	1	0	0	0
1	1	0.2	2	2	0.1	1	0	0	0
1	1	0.2	2	2	0.2	1	0	0	0
1	1	0.2	2	2	0.3	1	0	0	0
1	1	0.2	2	2	0.4	1	0	0	0
1	1	0.2	2	2	0.5	1	0	0	0
1	1	0.2	2	3	0	1	0	0	0
1	1	0.2	2	3	0.1	1	0	0	0
1	1	0.2	2	3	0.2	1	0	0	0
1	1	0.2	2	3	0.3	1	0	0	0
1	1	0.2	2	3	0.4	1	0	0	0
1	1	0.2	2	3	0.5	1	0	0	0
1	1	0.2	3	1	0	1	0	0	0
1	1	0.2	3	1	0.1	1	0	0	0
1	1	0.2	3	1	0.2	1	0	0	0
1	1	0.2	3	1	0.3	1	0	0	0
1	1	0.2	3	1	0.4	1	0	0	0
1	1	0.2	3	1	0.5	1	0	0	0
1	1	0.2	3	2	0	1	0	0	0
1	1	0.2	3	2	0.1	1	0	0	0
1	1	0.2	3	2	0.2	1	0	0	0
1	1	0.2	3	2	0.3	1	0	0	0
1	1	0.2	3	2	0.4	1	0	0	0
1	1	0.2	3	2	0.5	1	0	0	0
1	1	0.2	3	3	0	1	0	0	0
1	1	0.2	3	3	0.1	1	0	0	0
1	1	0.2	3	3	0.2	1	0	0	0
1	1	0.2	3	3	0.3	1	0	0	0
1	1	0.2	3	3	0.4	1	0	0	0
1	1	0.2	3	3	0.5	1	0	0	0
1	2	-0.2	1	1	0	0	1.18505	2.20353	1
1	2	-0.2	1	1	0.1	0	1.18505	2.20353	1
1	2	-0.2	1	1	0.2	0	0.810265	2.10337	1
1	2	-0.2	1	1	0.3	0	-0.936598	1.4022	1
1	2	-0.2	1	1	0.4	0	-1.14616	1.10177	1
1	2	-0.2	1	1	0.5	0	0	0	0
1	2	-0.2	1	2	0	0	2.74538	3.00481	1
1	2	-0.2	1	2	0.1	0	2.32431	2.50403	1
1	2	-0.2	1	2	0.2	0	1.97902	2.40384	1
1	2	-0.2	1	2	0.3	0	1.97902	2.40384	1
1	2	-0.2	1	2	0.4	0	1.54964	2.3037	1
1	2	-0.2	1	2	0.5	0	1.18505	2.20353	1
1	2	-0.2	1	3	0	0	6.38553	4.00643	1
1	2	-0.2	1	3	0.1	0	4.78887	3.50567	1
1	2	-0.2	1	3	0.2	0	4.78887	3.4055	1
1	2	-0.2	1	3	0.3	0	3.158	3.10497	1
1	2	-0.2	1	3	0.4	0	2.32431	2.50403	1
1	2	-0.2	1	3	0.5	0	1.97902	2.40384	1
1	2	-0.2	2	1	0	0	1.54964	2.3037	1
1	2	-0.2	2	1	0.1	0	1.54964	2.3037	1
1	2	-0.2	2	1	0.2	0	1.18505	2.20353	1
1	2	-0.2	2	1	0.3	0	0.810265	2.10337	1
1	2	-0.2	2	1	0.4	0	-0.936598	1.4022	1
1	2	-0.2	2	1	0.5	0	-1.14616	1.10177	1
1	2	-0.2	2	2	0	0	3.158	3.10497	1
1	2	-0.2	2	2	0.1	0	2.74538	3.00481	1
1	2	-0.2	2	2	0.2	0	2.32431	2.50403	1
1	2	-0.2	2	2	0.3	0	1.97902	2.40384	1
1	2	-0.2	2	2	0.4	0	1.54964	2.3037	1
1	2	-0.2	2	2	0.5	0	1.18505	2.20353	1
1	2	-0.2	2	3	0	0	6.76784	4.10668	1
1	2	-0.2	2	3	0.1	0	6.38553	3.90628	1
1	2	-0.2	2	3	0.2	0	4.78887	3.50567	1
1	2	-0.2	2	3	0.3	0	3.158	3.10497	1
1	2	-0.2	2	3	0.4	0	2.32431	2.50403	1
1	2	-0.2	2	3	0.5	0	1.97902	2.40384	1
1	2	-0.2	3	1	0	0	1.97902	2.40384	1
1	2	-0.2	3	1	0.1	0	1.54964	2.3037	1
1	2	-0.2	3	1	0.2	0	1.54964	2.3037	1
1	2	-0.2	3	1	0.3	0	1.18505	2.20353	1
1	2	-0.2	3	1	0.4	0	0.810265	2.10337	1
1	2	-0.2	3	1	0.5	0	-0.936598	1.4022	1
1	2	-0.2	3	2	0	0	4.78887	3.50567	1
1	2	-0.2	3	2	0.1	0	3.158	3.10497	1
1	2	-0.2	3	2	0.2	0	2.74538	3.00481	1
1	2	-0.2	3	2	0.3	0	2.32431	2.50403	1
1	2	-0.2	3	2	0.4	0	1.97902	2.40384	1
1	2	-0.2	3	2	0.5	0	1.54964	2.3037	1
1	2	-0.2	3	3	0	0	6.76784	4.20679	1
1	2	-0.2	3	3	0.1	0	6.76784	4.10668	1
1	2	-0.2	3	3	0.2	0	4.78887	3.50567	1
1	2	-0.2	3	3	0.3	0	4.78887	3.4055	1
1	2	-0.2	3	3	0.4	0	2.74538	3.00481	1
1	2	-0.2	3	3	0.5	0	2.32431	2.50403	1
1	2	-0.1	1	1	0	0	1.97902	2.40384	1
1	2	-0.1	1	1	0.1	0	1.54964	2.3037	1
1	2	-0.1	1	1	0.2	0	1.18505	2.20353	1
1	2	-0.1	1	1	0.3	0	1.18505	2.20353	1
1	2	-0.1	1	1	0.4	0	0.810265	1.90306	1
1	2	-0.1	1	1	0.5	0	-0.787156	1.30207	1
1	2	-0.1	1	2	0	0	4.78887	3.4055	1
1	2	-0.1	1	2	0.1	0	3.158	2.70436	1
1	2	-0.1	1	2	0.2	0	2.74538	2.6042	1
1	2	-0.1	1	2	0.3	0	2.32431	2.50403	1
1	2	-0.1	1	2	0.4	0	1.97902	2.40384	1
1	2	-0.1	1	2	0.5	0	1.54964	2.3037	1
1	2	-0.1	1	3	0	0	6.76784	4.00653	1
1	2	-0.1	1	3	0.1	0	6.76784	4.00653	1
1	2	-0.1	1	3	0.2	0	4.78887	3.4055	1
1	2	-0.1	1	3	0.3	0	4.78887	3.4055	1
1	2	-0.1	1	3	0.4	0	3.158	2.70436	1
1	2	-0.1	1	3	0.5	0	2.32431	2.50403	1
1	2	-0.1	2	1	0	0	1.97902	2.40384	1
1	2	-0.1	2	1	0.1	0	1.97902	2.40384	1
1	2	-0.1	2	1	0.2	0	1.54964	2.3037	1
1	2	-0.1	2	1	0.3	0	1.54964	2.3037	1
1	2	-0.1	2	1	0.4	0	1.18505	2.20353	1
1	2	-0.1	2	1	0.5	0	0.810265	1.90306	1
1	2	-0.1	2	2	0	0	4.78887	3.4055	1
1	2	-0.1	2	2	0.1	0	3.74429	3.20513	1
1	2	-0.1	2	2	0.2	0	3.158	2.70436	1
1	2	-0.1	2	2	0.3	0	2.32431	2.50403	1
1	2	-0.1	2	2	0.4	0	1.97902	2.40384	1
1	2	-0.1	2	2	0.5	0	1.97902	2.40384	1
1	2	-0.1	2	3	0	0	6.76784	4.10668	1
1	2	-0.1	2	3	0.1	0	6.76784	4.00653	1
1	2	-0.1	2	3	0.2	0	6.38553	3.90628	1
1	2	-0.1	2	3	0.3	0	4.78887	3.4055	1
1	2	-0.1	2	3	0.4	0	3.158	2.70436	1
1	2	-0.1	2	3	0.5	0	2.32431	2.50403	1
1	2	-0.1	3	1	0	0	2.32431	2.50403	1
1	2	-0.1	3	1	0.1	0	1.97902	2.40384	1
1	2	-0.1	3	1	0.2	0	1.97902	2.40384	1
1	2	-0.1	3	1	0.3	0	1.54964	2.3037	1
1	2	-0.1	3	1	0.4	0	1.54964	2.3037	1
1	2	-0.1	3	1	0.5	0	1.18505	2.20353	1
1	2	-0.1	3	2	0	0	6.38553	3.90628	1
1	2	-0.1	3	2	0.1	0	4.78887	3.4055	1
1	2	-0.1	3	2	0.2	0	3.158	3.10497	1
1	2	-0.1	3	2	0.3	0	2.74538	2.6042	1
1	2	-0.1	3	2	0.4	0	2.32431	2.50403	1
1	2	-0.1	3	2	0.5	0	1.97902	2.40384	1
1	2	-0.1	3	3	0	0	6.76784	4.20679	1
1	2	-0.1	3	3	0.1	0	6.76784	4.10668	1
1	2	-0.1	3	3	0.2	0	6.76784	4.00653	1
1	2	-0.1	3	3	0.3	0	4.78887	3.4055	1
1	2	-0.1	3	3	0.4	0	3.74429	3.20513	1
1	2	-0.1	3	3	0.5	0	2.74538	2.6042	1
1	2	0	1	1	0	0	2.32431	2.50403	1
1	2	0	1	1	0.1	0	1.97902	2.40384	1
1	2	0	1	1	0.2	0	1.97902	2.40384	1
1	2	0	1	1	0.3	0	1.54964	2.3037	1
1	2	0	1	1	0.4	0	1.54964	2.3037	1
1	2	0	1	1	0.5	0	1.18505	2.00322	1
1	2	0	1	2	0	0	4.78887	3.4055	1
1	2	0	1	2	0.1	0	4.78887	3.00489	1
1	2	0	1	2	0.2	0	3.158	2.70436	1
1	2	0	1	2	0.3	0	2.74538	2.6042	1
1	2	0	1	2	0.4	0	2.32431	2.50403	1
1	2	0	1	2	0.5	0	1.97902	2.40384	1
1	2	0	1	3	0	0	6.76784	4.10668	1
1	2	0	1	3	0.1	0	6.76784	4.00653	1
1	2	0	1	3	0.2	0	6.76784	3.90636	1
1	2	0	1	3	0.3	0	6.38553	3.80611	1
1	2	0	1	3	0.4	0	4.78887	3.00489	1
1	2	0	1	3	0.5	0	3.158	2.70436	1
1	2	0	2	1	0	0	2.32431	2.50403	1
1	2	0	2	1	0.1	0	2.32431	2.50403	1
1	2	0	2	1	0.2	0	1.97902	2.40384	1
1	2	0	2	1	0.3	0	1.97902	2.40384	1
1	2	0	2	1	0.4	0	1.54964	2.3037	1
1	2	0	2	1	0.5	0	1.54964	2.3037	1
1	2	0	2	2	0	0	6.76784	3.90636	1
1	2	0	2	2	0.1	0	4.78887	3.4055	1
1	2	0	2	2	0.2	0	4.78887	3.00489	1
1	2	0	2	2	0.3	0	3.158	2.70436	1
1	2	0	2	2	0.4	0	2.32431	2.50403	1
1	2	0	2	2	0.5	0	2.32431	2.50403	1
1	2	0	2	3	0	0	6.76784	4.10668	1
1	2	0	2	3	0.1	0	6.76784	4.00653	1
1	2	0	2	3	0.2	0	6.76784	4.00653	1
1	2	0	2	3	0.3	0	6.38553	3.80611	1
1	2	0	2	3	0.4	0	4.78887	3.00489	1
1	2	0	2	3	0.5	0	3.158	2.70436	1
1	2	0	3	1	0	0	2.74538	2.6042	1
1	2	0	3	1	0.1	0	2.32431	2.50403	1
1	2	0	3	1	0.2	0	2.32431	2.50403	1
1	2	0	3	1	0.3	0	1.97902	2.40384	1
1	2	0	3	1	0.4	0	1.97902	2.40384	1
1	2	0	3	1	0.5	0	1.54964	2.3037	1
1	2	0	3	2	0	0	6.76784	4.00653	1
1	2	0	3	2	0.1	0	6.38553	3.80611	1
1	2	0	3	2	0.2	0	4.78887	3.4055	1
1	2	0	3	2	0.3	0	3.158	2.70436	1
1	2	0	3	2	0.4	0	2.74538	2.6042	1
1	2	0	3	2	0.5	0	2.32431	2.50403	1
1	2	0	3	3	0	0	6.76784	4.20679	1
1	2	0	3	3	0.1	0	6.76784	4.10668	1
1	2	0	3	3	0.2	0	6.76784	4.00653	1
1	2	0	3	3	0.3	0	6.76784	3.90636	1
1	2	0	3	3	0.4	0	4.78887	3.4055	1
1	2	0	3	3	0.5	0	3.158	2.70436	1
1	2	0.1	1	1	0	0	2.74538	2.6042	1
1	2	0.1	1	1	0.1	0	2.32431	2.50403	1
1	2	0.1	1	1	0.2	0	2.32431	2.50403	1
1	2	0.1	1	1	0.3	0	1.97902	2.40384	1
1	2	0.1	1	1	0.4	0	1.97902	2.40384	1
1	2	0.1	1	1	0.5	0	1.54964	2.3037	1
1	2	0.1	1	2	0	0	6.76784	3.90636	1
1	2	0.1	1	2	0.1	0	6.38553	3.4055	1
1	2	0.1	1	2	0.2	0	4.78887	3.00489	1
1	2	0.1	1	2	0.3	0	3.158	2.70436	1
1	2	0.1	1	2	0.4	0	2.74538	2.6042	1
1	2	0.1	1	2	0.5	0	2.32431	2.50403	1
1	2	0.1	1	3	0	0	6.76784	4.10668	1
1	2	0.1	1	3	0.1	0	6.76784	4.00653	1
1	2	0.1	1	3	0.2	0	6.76784	3.90636	1
1	2	0.1	1	3	0.3	0	6.76784	3.90636	1
1	2	0.1	1	3	0.4	0	6.38553	3.4055	1
1	2	0.1	1	3	0.5	0	3.74429	2.80452	1
1	2	0.1	2	1	0	0	3.158	2.70436	1
1	2	0.1	2	1	0.1	0	2.74538	2.6042	1
1	2	0.1	2	1	0.2	0	2.32431	2.50403	1
1	2	0.1	2	1	0.3	0	2.32431	2.50403	1
1	2	0.1	2	1	0.4	0	1.97902	2.40384	1
1	2	0.1	2	1	0.5	0	1.97902	2.40384	1
1	2	0.1	2	2	0	0	6.76784	3.90636	1
1	2	0.1	2	2	0.1	0	6.76784	3.90636	1
1	2	0.1	2	2	0.2	0	4.78887	3.00489	1
1	2	0.1	2	2	0.3	0	4.78887	3.00489	1
1	2	0.1	2	2	0.4	0	3.158	2.70436	1
1	2	0.1	2	2	0.5	0	2.74538	2.6042	1
1	2	0.1	2	3	0	0	6.76784	4.10668	1
1	2	0.1	2	3	0.1	0	6.76784	4.00653	1
1	2	0.1	2	3	0.2	0	6.76784	4.00653	1
1	2	0.1	2	3	0.3	0	6.76784	3.90636	1
1	2	0.1	2	3	0.4	0	6.38553	3.4055	1
1	2	0.1	2	3	0.5	0	4.78887	3.00489	1
1	2	0.1	3	1	0	0	3.158	2.70436	1
1	2	0.1	3	1	0.1	0	3.158	2.70436	1
1	2	0.1	3	1	0.2	0	2.74538	2.6042	1
1	2	0.1	3	1	0.3	0	2.32431	2.50403	1
1	2	0.1	3	1	0.4	0	2.32431	2.50403	1
1	2	0.1	3	1	0.5	0	1.97902	2.40384	1
1	2	0.1	3	2	0	0	6.76784	4.00653	1
1	2	0.1	3	2	0.1	0	6.76784	3.90636	1
1	2	0.1	3	2	0.2	0	6.76784	3.90636	1
1	2	0.1	3	2	0.3	0	4.78887	3.00489	1
1	2	0.1	3	2	0.4	0	3.158	2.70436	1
1	2	0.1	3	2	0.5	0	2.74538	2.6042	1
1	2	0.1	3	3	0	0	6.76784	4.20679	1
1	2	0.1	3	3	0.1	0	6.76784	4.10668	1
1	2	0.1	3	3	0.2	0	6.76784	4.00653	1
1	2	0.1	3	3	0.3	0	6.76784	3.90636	1
1	2	0.1	3	3	0.4	0	6.76784	3.90636	1
1	2	0.1	3	3	0.5	0	4.78887	3.00489	1
1	2	0.2	1	1	0	0	3.158	2.70436	1
1	2	0.2	1	1	0.1	0	2.74538	2.6042	1
1	2	0.2	1	1	0.2	0	2.74538	2.6042	1
1	2	0.2	1	1	0.3	0	2.32431	2.50403	1
1	2	0.2	1	1	0.4	0	2.32431	2.50403	1
1	2	0.2	1	1	0.5	0	1.97902	2.40384	1
1	2	0.2	1	2	0	0	6.76784	3.90636	1
1	2	0.2	1	2	0.1	0	6.76784	3.50575	1
1	2	0.2	1	2	0.2	0	6.38553	3.4055	1
1	2	0.2	1	2	0.3	0	4.78887	3.00489	1
1	2	0.2	1	2	0.4	0	3.74429	2.80452	1
1	2	0.2	1	2	0.5	0	3.158	2.70436	1
1	2	0.2	1	3	0	0	6.76784	4.00653	1
1	2	0.2	1	3	0.1	0	6.76784	4.00653	1
1	2	0.2	1	3	0.2	0	6.76784	3.90636	1
1	2	0.2	1	3	0.3	0	6.76784	3.90636	1
1	2	0.2	1	3	0.4	0	6.76784	3.50575	1
1	2	0.2	1	3	0.5	0	4.78887	3.00489	1
1	2	0.2	2	1	0	0	3.74429	2.80452	1
1	2	0.2	2	1	0.1	0	3.158	2.70436	1
1	2	0.2	2	1	0.2	0	2.74538	2.6042	1
1	2	0.2	2	1	0.3	0	2.74538	2.6042	1
1	2	0.2	2	1	0.4	0	2.32431	2.50403	1
1	2	0.2	2	1	0.5	0	2.32431	2.50403	1
1	2	0.2	2	2	0	0	6.76784	3.90636	1
1	2	0.2	2	2	0.1	0	6.76784	3.90636	1
1	2	0.2	2	2	0.2	0	6.76784	3.50575	1
1	2	0.2	2	2	0.3	0	6.38553	3.4055	1
1	2	0.2	2	2	0.4	0	4.78887	3.00489	1
1	2	0.2	2	2	0.5	0	3.158	2.70436	1
1	2	0.2	2	3	0	0	6.76784	4.10668	1
1	2	0.2	2	3	0.1	0	6.76784	4.00653	1
1	2	0.2	2	3	0.2	0	6.76784	4.00653	1
1	2	0.2	2	3	0.3	0	6.76784	3.90636	1
1	2	0.2	2	3	0.4	0	6.76784	3.50575	1
1	2	0.2	2	3	0.5	0	6.38553	3.4055	1
1	2	0.2	3	1	0	0	4.78887	3.00489	1
1	2	0.2	3	1	0.1	0	3.74429	2.80452	1
1	2	0.2	3	1	0.2	0	3.158	2.70436	1
1	2	0.2	3	1	0.3	0	2.74538	2.6042	1
1	2	0.2	3	1	0.4	0	2.32431	2.50403	1
1	2	0.2	3	1	0.5	0	2.32431	2.50403	1
1	2	0.2	3	2	0	0	6.76784	4.00653	1
1	2	0.2	3	2	0.1	0	6.76784	3.90636	1
1	2	0.2	3	2	0.2	0	6.76784	3.90636	1
1	2	0.2	3	2	0.3	0	6.76784	3.50575	1
1	2	0.2	3	2	0.4	0	4.78887	3.00489	1
1	2	0.2	3	2	0.5	0	3.158	2.70436	1
1	2	0.2	3	3	0	0	6.76784	4.20679	1
1	2	0.2	3	3	0.1	0	6.76784	4.10668	1
1	2	0.2	3	3	0.2	0	6.76784	4.00653	1
1	2	0.2	3	3	0.3	0	6.76784	3.90636	1
1	2	0.2	3	3	0.4	0	6.76784	3.90636	1
1	2	0.2	3	3	0.5	0	6.38553	3.4055	1
1	2	-0.2	1	1	0	1	0	0	0
1	2	-0.2	1	1	0.1	1	0	0	0
1	2	-0.2	1	1	0.2	1	0	0	0
1	2	-0.2	1	1	0.3	1	0	0	0
1	2	-0.2	1	1	0.4	1	0	0	0
1	2	-0.2	1	1	0.5	1	0	0	0
1	2	-0.2	1	2	0	1	0	0	0
1	2	-0.2	1	2	0.1	1	0	0	0
1	2	-0.2	1	2	0.2	1	0	0	0
1	2	-0.2	1	2	0.3	1	0	0	0
1	2	-0.2	1	2	0.4	1	0	0	0
1	2	-0.2	1	2	0.5	1	0	0	0
1	2	-0.2	1	3	0	1	0.653717	2.00312	1
1	2	-0.2	1	3	0.1	1	-0.47155	1.4022	1
1	2	-0.2	1	3	0.2	1	0	0	0
1	2	-0.2	1	3	0.3	1	0	0	0
1	2	-0.2	1	3	0.4	1	0	0	0
1	2	-0.2	1	3	0.5	1	0	0	0
1	2	-0.2	2	1	0	1	0	0	0
1	2	-0.2	2	1	0.1	1	0	0	0
1	2	-0.2	2	1	0.2	1	0	0	0
1	2	-0.2	2	1	0.3	1	0	0	0
1	2	-0.2	2	1	0.4	1	0	0	0
1	2	-0.2	2	1	0.5	1	0	0	0
1	2	-0.2	2	2	0	1	-0.1244	1.00158	1
1	2	-0.2	2	2	0.1	1	0	0	0
1	2	-0.2	2	2	0.2	1	0	0	0
1	2	-0.2	2	2	0.3	1	0	0	0
1	2	-0.2	2	2	0.4	1	0	0	0
1	2	-0.2	2	2	0.5	1	0	0	0
1	2	-0.2	2	3	0	1	1.19199	2.30364	1
1	2	-0.2	2	3	0.1	1	0.653717	2.00312	1
1	2	-0.2	2	3	0.2	1	-0.47155	1.4022	1
1	2	-0.2	2	3	0.3	1	0	0	0
1	2	-0.2	2	3	0.4	1	0	0	0
1	2	-0.2	2	3	0.5	1	0	0	0
1	2	-0.2	3	1	0	1	0	0	0
1	2	-0.2	3	1	0.1	1	0	0	0
1	2	-0.2	3	1	0.2	1	0	0	0
1	2	-0.2	3	1	0.3	1	0	0	0
1	2	-0.2	3	1	0.4	1	0	0	0
1	2	-0.2	3	1	0.5	1	0	0	0
1	2	-0.2	3	2	0	1	0.706171	1.90299	1
1	2	-0.2	3	2	0.1	1	-0.302363	1.30208	1
1	2	-0.2	3	2	0.2	1	0	0	0
1	2	-0.2	3	2	0.3	1	0	0	0
1	2	-0.2	3	2	0.4	1	0	0	0
1	2	-0.2	3	2	0.5	1	0	0	0
1	2	-0.2	3	3	0	1	2.17706	2.60412	1
1	2	-0.2	3	3	0.1	1	1.19199	2.30364	1
1	2	-0.2	3	3	0.2	1	0.653717	2.00312	1
1	2	-0.2	3	3	0.3	1	-0.302363	1.30208	1
1	2	-0.2	3	3	0.4	1	0	0	0
1	2	-0.2	3	3	0.5	1	0	0	0
1	2	-0.1	1	1	0	1	0	0	0
1	2	-0.1	1	1	0.1	1	0	0	0
1	2	-0.1	1	1	0.2	1	0	0	0
1	2	-0.1	1	1	0.3	1	0	0	0
1	2	-0.1	1	1	0.4	1	0	0	0
1	2	-0.1	1	1	0.5	1	0	0	0
1	2	-0.1	1	2	0	1	-0.302363	1.10177	1
1	2	-0.1	1	2	0.1	1	0	0	0
1	2	-0.1	1	2	0.2	1	0	0	0
1	2	-0.1	1	2	0.3	1	0	0	0
1	2	-0.1	1	2	0.4	1	0	0	0
1	2	-0.1	1	2	0.5	1	0	0	0
1	2	-0.1	1	3	0	1	2.17706	2.50397	1
1	2	-0.1	1	3	0.1	1	1.19199	2.20347	1
1	2	-0.1	1	3	0.2	1	0.653717	1.60251	1
1	2	-0.1	1	3	0.3	1	-0.302363	1.10177	1
1	2	-0.1	1	3	0.4	1	0	0	0
1	2	-0.1	1	3	0.5	1	0	0	0
1	2	-0.1	2	1	0	1	0	0	0
1	2	-0.1	2	1	0.1	1	0	0	0
1	2	-0.1	2	1	0.2	1	0	0	0
1	2	-0.1	2	1	0.3	1	0	0	0
1	2	-0.1	2	1	0.4	1	0	0	0
1	2	-0.1	2	1	0.5	1	0	0	0
1	2	-0.1	2	2	0	1	0.653717	1.60251	1
1	2	-0.1	2	2	0.1	1	-0.47155	1.4022	1
1	2	-0.1	2	2	0.2	1	0	0	0
1	2	-0.1	2	2	0.3	1	0	0	0
1	2	-0.1	2	2	0.4	1	0	0	0
1	2	-0.1	2	2	0.5	1	0	0	0
1	2	-0.1	2	3	0	1	2.58825	2.7043	1
1	2	-0.1	2	3	0.1	1	2.17706	2.50397	1
1	2	-0.1	2	3	0.2	1	1.19199	2.20347	1
1	2	-0.1	2	3	0.3	1	0.706171	1.50238	1
1	2	-0.1	2	3	0.4	1	0	0	0
1	2	-0.1	2	3	0.5	1	0	0	0
1	2	-0.1	3	1	0	1	0	0	0
1	2	-0.1	3	1	0.1	1	0	0	0
1	2	-0.1	3	1	0.2	1	0	0	0
1	2	-0.1	3	1	0.3	1	0	0	0
1	2	-0.1	3	1	0.4	1	0	0	0
1	2	-0.1	3	1	0.5	1	0	0	0
1	2	-0.1	3	2	0	1	1.87501	2.30158	1
1	2	-0.1	3	2	0.1	1	1.01647	1.70267	1
1	2	-0.1	3	2	0.2	1	0.706171	1.50238	1
1	2	-0.1	3	2	0.3	1	0	0	0
1	2	-0.1	3	2	0.4	1	0	0	0
1	2	-0.1	3	2	0.5	1	0	0	0
1	2	-0.1	3	3	0	1	2.99063	2.90457	1
1	2	-0.1	3	3	0.1	1	2.58825	2.7043	1
1	2	-0.1	3	3	0.2	1	1.87501	2.40175	1
1	2	-0.1	3	3	0.3	1	1.01647	1.70267	1
1	2	-0.1	3	3	0.4	1	-0.47155	1.4022	1
1	2	-0.1	3	3	0.5	1	0	0	0
1	2	0	1	1	0	1	0	0	0
1	2	0	1	1	0.1	1	0	0	0
1	2	0	1	1	0.2	1	0	0	0
1	2	0	1	1	0.3	1	0	0	0
1	2	0	1	1	0.4	1	0	0	0
1	2	0	1	1	0.5	1	0	0	0
1	2	0	1	2	0	1	1.19199	1.80286	1
1	2	0	1	2	0.1	1	0.706171	1.50238	1
1	2	0	1	2	0.2	1	-0.302363	1.10177	1
1	2	0	1	2	0.3	1	0	0	0
1	2	0	1	2	0.4	1	0	0	0
1	2	0	1	2	0.5	1	0	0	0
1	2	0	1	3	0	1	2.99063	2.70431	1
1	2	0	1	3	0.1	1	2.58825	2.50398	1
1	2	0	1	3	0.2	1	1.87501	1.90097	1
1	2	0	1	3	0.3	1	1.19199	1.80286	1
1	2	0	1	3	0.4	1	0.706171	1.50238	1
1	2	0	1	3	0.5	1	0	0	0
1	2	0	2	1	0	1	0	0	0
1	2	0	2	1	0.1	1	0	0	0
1	2	0	2	1	0.2	1	0	0	0
1	2	0	2	1	0.3	1	0	0	0
1	2	0	2	1	0.4	1	0	0	0
1	2	0	2	1	0.5	1	0	0	0
1	2	0	2	2	0	1	1.87501	2.30158	1
1	2	0	2	2	0.1	1	1.19199	1.80286	1
1	2	0	2	2	0.2	1	0.706171	1.50238	1
1	2	0	2	2	0.3	1	-0.302363	1.10177	1
1	2	0	2	2	0.4	1	0	0	0
1	2	0	2	2	0.5	1	0	0	0
1	2	0	2	3	0	1	3.90957	3.00477	1
1	2	0	2	3	0.1	1	2.99063	2.70431	1
1	2	0	2	3	0.2	1	2.58825	2.50398	1
1	2	0	2	3	0.3	1	1.87501	1.90097	1
1	2	0	2	3	0.4	1	0.653717	1.60251	1
1	2	0	2	3	0.5	1	-0.1244	1.00158	1
1	2	0	3	1	0	1	0.706171	1.50238	1
1	2	0	3	1	0.1	1	-0.1244	1.00158	1
1	2	0	3	1	0.2	1	0	0	0
1	2	0	3	1	0.3	1	0	0	0
1	2	0	3	1	0.4	1	0	0	0
1	2	0	3	1	0.5	1	0	0	0
1	2	0	3	2	0	1	2.58825	2.60415	1
1	2	0	3	2	0.1	1	2.17706	2.4038	1
1	2	0	3	2	0.2	1	1.19199	1.80286	1
1	2	0	3	2	0.3	1	0.706171	1.50238	1
1	2	0	3	2	0.4	1	-0.1244	1.00158	1
1	2	0	3	2	0.5	1	0	0	0
1	2	0	3	3	0	1	4.31134	3.20507	1
1	2	0	3	3	0.1	1	3.38091	2.90463	1
1	2	0	3	3	0.2	1	2.99063	2.70431	1
1	2	0	3	3	0.3	1	2.17706	2.4038	1
1	2	0	3	3	0.4	1	1.19199	1.80286	1
1	2	0	3	3	0.5	1	0.706171	1.50238	1
1	2	0.1	1	1	0	1	0	0	0
1	2	0.1	1	1	0.1	1	0	0	0
1	2	0.1	1	1	0.2	1	0	0	0
1	2	0.1	1	1	0.3	1	0	0	0
1	2	0.1	1	1	0.4	1	0	0	0
1	2	0.1	1	1	0.5	1	0	0	0
1	2	0.1	1	2	0	1	2.58825	2.10337	1
1	2	0.1	1	2	0.1	1	1.87501	1.90097	1
1	2	0.1	1	2	0.2	1	1.19199	1.80286	1
1	2	0.1	1	2	0.3	1	0.706171	1.30207	1
1	2	0.1	1	2	0.4	1	0	0	0
1	2	0.1	1	2	0.5	1	0	0	0
1	2	0.1	1	3	0	1	4.31134	3.00481	1
1	2	0.1	1	3	0.1	1	3.38091	2.80448	1
1	2	0.1	1	3	0.2	1	2.99063	2.60414	1
1	2	0.1	1	3	0.3	1	2.58825	2.10337	1
1	2	0.1	1	3	0.4	1	1.87501	1.90097	1
1	2	0.1	1	3	0.5	1	0.706171	1.50238	1
1	2	0.1	2	1	0	1	0.706171	1.50238	1
1	2	0.1	2	1	0.1	1	-0.1244	1.00158	1
1	2	0.1	2	1	0.2	1	0	0	0
1	2	0.1	2	1	0.3	1	0	0	0
1	2	0.1	2	1	0.4	1	0	0	0
1	2	0.1	2	1	0.5	1	0	0	0
1	2	0.1	2	2	0	1	2.99063	2.60414	1
1	2	0.1	2	2	0.1	1	2.58825	2.10337	1
1	2	0.1	2	2	0.2	1	1.87501	1.90097	1
1	2	0.1	2	2	0.3	1	1.01647	1.70267	1
1	2	0.1	2	2	0.4	1	-0.47155	1.20189	1
1	2	0.1	2	2	0.5	1	0	0	0
1	2	0.1	2	3	0	1	4.75984	3.20513	1
1	2	0.1	2	3	0.1	1	3.90957	2.90462	1
1	2	0.1	2	3	0.2	1	3.38091	2.80448	1
1	2	0.1	2	3	0.3	1	2.99063	2.60414	1
1	2	0.1	2	3	0.4	1	2.17706	2.00319	1
1	2	0.1	2	3	0.5	1	1.01647	1.70267	1
1	2	0.1	3	1	0	1	1.19199	1.80286	1
1	2	0.1	3	1	0.1	1	0.653717	1.60251	1
1	2	0.1	3	1	0.2	1	-0.47155	1.20189	1
1	2	0.1	3	1	0.3	1	0	0	0
1	2	0.1	3	1	0.4	1	0	0	0
1	2	0.1	3	1	0.5	1	0	0	0
1	2	0.1	3	2	0	1	3.38091	2.80448	1
1	2	0.1	3	2	0.1	1	2.99063	2.60414	1
1	2	0.1	3	2	0.2	1	2.58825	2.10337	1
1	2	0.1	3	2	0.3	1	1.87501	1.90097	1
1	2	0.1	3	2	0.4	1	0.653717	1.60251	1
1	2	0.1	3	2	0.5	1	-0.1244	1.00158	1
1	2	0.1	3	3	0	1	5.23174	3.4054	1
1	2	0.1	3	3	0.1	1	4.31134	3.10496	1
1	2	0.1	3	3	0.2	1	3.90957	2.90462	1
1	2	0.1	3	3	0.3	1	3.38091	2.70431	1
1	2	0.1	3	3	0.4	1	2.58825	2.10337	1
1	2	0.1	3	3	0.5	1	1.87501	1.90097	1
1	2	0.2	1	1	0	1	0.706171	1.30207	1
1	2	0.2	1	1	0.1	1	0	0	0
1	2	0.2	1	1	0.2	1	0	0	0
1	2	0.2	1	1	0.3	1	0	0	0
1	2	0.2	1	1	0.4	1	0	0	0
1	2	0.2	1	1	0.5	1	0	0	0
1	2	0.2	1	2	0	1	3.38091	2.3037	1
1	2	0.2	1	2	0.1	1	2.99063	2.20353	1
1	2	0.2	1	2	0.2	1	2.58825	2.10337	1
1	2	0.2	1	2	0.3	1	1.87501	1.90097	1
1	2	0.2	1	2	0.4	1	0.706171	1.50238	1
1	2	0.2	1	2	0.5	1	0	0	0
1	2	0.2	1	3	0	1	5.23174	3.20514	1
1	2	0.2	1	3	0.1	1	4.31134	3.00481	1
1	2	0.2	1	3	0.2	1	3.90957	2.80445	1
1	2	0.2	1	3	0.3	1	3.38091	2.3037	1
1	2	0.2	1	3	0.4	1	2.99063	2.20353	1
1	2	0.2	1	3	0.5	1	1.87501	1.90097	1
1	2	0.2	2	1	0	1	1.87501	1.90097	1
1	2	0.2	2	1	0.1	1	0.653717	1.60251	1
1	2	0.2	2	1	0.2	1	-0.47155	1.20189	1
1	2	0.2	2	1	0.3	1	0	0	0
1	2	0.2	2	1	0.4	1	0	0	0
1	2	0.2	2	1	0.5	1	0	0	0
1	2	0.2	2	2	0	1	3.90957	2.80445	1
1	2	0.2	2	2	0.1	1	3.38091	2.70431	1
1	2	0.2	2	2	0.2	1	2.99063	2.20353	1
1	2	0.2	2	2	0.3	1	2.17706	2.00319	1
1	2	0.2	2	2	0.4	1	1.87501	1.90097	1
1	2	0.2	2	2	0.5	1	0.706171	1.30207	1
1	2	0.2	2	3	0	1	6.86263	3.60582	1
1	2	0.2	2	3	0.1	1	4.75984	3.10498	1
1	2	0.2	2	3	0.2	1	4.31134	3.00481	1
1	2	0.2	2	3	0.3	1	3.90957	2.80445	1
1	2	0.2	2	3	0.4	1	2.99063	2.20353	1
1	2	0.2	2	3	0.5	1	2.17706	2.00319	1
1	2	0.2	3	1	0	1	2.58825	2.10337	1
1	2	0.2	3	1	0.1	1	1.87501	1.90097	1
1	2	0.2	3	1	0.2	1	1.19199	1.80286	1
1	2	0.2	3	1	0.3	1	0.706171	1.30207	1
1	2	0.2	3	1	0.4	1	0	0	0
1	2	0.2	3	1	0.5	1	0	0	0
1	2	0.2	3	2	0	1	4.31134	3.00481	1
1	2	0.2	3	2	0.1	1	3.90957	2.80445	1
1	2	0.2	3	2	0.2	1	3.38091	2.70431	1
1	2	0.2	3	2	0.3	1	2.99063	2.20353	1
1	2	0.2	3	2	0.4	1	2.17706	2.00319	1
1	2	0.2	3	2	0.5	1	1.01647	1.70267	1
1	2	0.2	3	3	0	1	6.86263	3.70593	1
1	2	0.2	3	3	0.1	1	5.81441	3.40545	1
1	2	0.2	3	3	0.2	1	4.31134	3.00481	1
1	2	0.2	3	3	0.3	1	3.90957	2.80445	1
1	2	0.2	3	3	0.4	1	3.38091	2.70431	1
1	2	0.2	3	3	0.5	1	2.58825	2.10337	1
1	3	-0.2	1	1	0	0	-1.08502	1.50072	1
1	3	-0.2	1	1	0.1	0	-1.08502	1.50072	1
1	3	-0.2	1	1	0.2	0	-1.08502	1.50072	1
1	3	-0.2	1	1	0.3	0	-1.08502	1.50072	1
1	3	-0.2	1	1	0.4	0	-1.08502	1.50072	1
1	3	-0.2	1	1	0.5	0	-1.85351	1.30056	1
1	3	-0.2	1	2	0	0	-1.08502	2.20102	1
1	3	-0.2	1	2	0.1	0	-1.08502	2.00094	1
1	3	-0.2	1	2	0.2	0	-1.08502	2.00094	1
1	3	-0.2	1	2	0.3	0	-1.08502	1.50072	1
1	3	-0.2	1	2	0.4	0	-1.08502	1.50072	1
1	3	-0.2	1	2	0.5	0	-1.08502	1.50072	1
1	3	-0.2	1	3	0	0	-1.08502	2.50115	1
1	3	-0.2	1	3	0.1	0	-1.08502	2.4011	1
1	3	-0.2	1	3	0.2	0	-1.08502	2.4011	1
1	3	-0.2	1	3	0.3	0	-1.08502	2.30106	1
1	3	-0.2	1	3	0.4	0	-1.08502	2.00094	1
1	3	-0.2	1	3	0.5	0	-1.08502	1.60352	1
1	3	-0.2	2	1	0	0	-1.08502	1.50072	1
1	3	-0.2	2	1	0.1	0	-1.08502	1.50072	1
1	3	-0.2	2	1	0.2	0	-1.08502	1.50072	1
1	3	-0.2	2	1	0.3	0	-1.08502	1.50072	1
1	3	-0.2	2	1	0.4	0	-1.08502	1.50072	1
1	3	-0.2	2	1	0.5	0	-1.08502	1.50072	1
1	3	-0.2	2	2	0	0	-1.08502	2.4011	1
1	3	-0.2	2	2	0.1	0	-1.08502	2.20102	1
1	3	-0.2	2	2	0.2	0	-1.08502	2.00094	1
1	3	-0.2	2	2	0.3	0	-1.08502	2.00094	1
1	3	-0.2	2	2	0.4	0	-1.08502	1.50072	1
1	3	-0.2	2	2	0.5	0	-1.08502	1.50072	1
1	3	-0.2	2	3	0	0	-1.08502	2.6012	1
1	3	-0.2	2	3	0.1	0	-1.08502	2.50115	1
1	3	-0.2	2	3	0.2	0	-1.08502	2.4011	1
1	3	-0.2	2	3	0.3	0	-1.08502	2.30106	1
1	3	-0.2	2	3	0.4	0	-1.08502	2.00094	1
1	3	-0.2	2	3	0.5	0	-1.08502	2.00094	1
1	3	-0.2	3	1	0	0	-1.08502	2.00094	1
1	3	-0.2	3	1	0.1	0	-1.08502	1.50072	1
1	3	-0.2	3	1	0.2	0	-1.08502	1.50072	1
1	3	-0.2	3	1	0.3	0	-1.08502	1.50072	1
1	3	-0.2	3	1	0.4	0	-1.08502	1.50072	1
1	3	-0.2	3	1	0.5	0	-1.08502	1.50072	1
1	3	-0.2	3	2	0	0	-1.08502	2.4011	1
1	3	-0.2	3	2	0.1	0	-1.08502	2.4011	1
1	3	-0.2	3	2	0.2	0	-1.08502	2.20102	1
1	3	-0.2	3	2	0.3	0	-1.08502	2.00094	1
1	3	-0.2	3	2	0.4	0	-1.08502	1.50072	1
1	3	-0.2	3	2	0.5	0	-1.08502	1.50072	1
1	3	-0.2	3	3	0	0	-1.08502	2.7012	1
1	3	-0.2	3	3	0.1	0	-1.08502	2.6012	1
1	3	-0.2	3	3	0.2	0	-1.08502	2.50115	1
1	3	-0.2	3	3	0.3	0	-1.08502	2.4011	1
1	3	-0.2	3	3	0.4	0	-1.08502	2.20102	1
1	3	-0.2	3	3	0.5	0	-1.08502	2.00094	1
1	3	-0.1	1	1	0	0	-1.08502	1.50072	1
1	3	-0.1	1	1	0.1	0	-1.08502	1.50072	1
1	3	-0.1	1	1	0.2	0	-1.08502	1.50072	1
1	3	-0.1	1	1	0.3	0	-1.08502	1.50072	1
1	3	-0.1	1	1	0.4	0	-1.08502	1.50072	1
1	3	-0.1	1	1	0.5	0	-1.08502	1.50072	1
1	3	-0.1	1	2	0	0	-1.08502	2.20102	1
1	3	-0.1	1	2	0.1	0	-1.08502	2.00094	1
1	3	-0.1	1	2	0.2	0	-1.08502	2.00094	1
1	3	-0.1	1	2	0.3	0	-1.08502	1.50072	1
1	3	-0.1	1	2	0.4	0	-1.08502	1.50072	1
1	3	-0.1	1	2	0.5	0	-1.08502	1.50072	1
1	3	-0.1	1	3	0	0	-1.08502	2.50115	1
1	3	-0.1	1	3	0.1	0	-1.08502	2.4011	1
1	3	-0.1	1	3	0.2	0	-1.08502	2.4011	1
1	3	-0.1	1	3	0.3	0	-1.08502	2.20102	1
1	3	-0.1	1	3	0.4	0	-1.08502	2.00094	1
1	3	-0.1	1	3	0.5	0	-1.08502	1.50072	1
1	3	-0.1	2	1	0	0	-1.08502	1.50072	1
1	3	-0.1	2	1	0.1	0	-1.08502	1.50072	1
1	3	-0.1	2	1	0.2	0	-1.08502	1.50072	1
1	3	-0.1	2	1	0.3	0	-1.08502	1.50072	1
1	3	-0.1	2	1	0.4	0	-1.08502	1.50072	1
1	3	-0.1	2	1	0.5	0	-1.08502	1.50072	1
1	3	-0.1	2	2	0	0	-1.08502	2.30106	1
1	3	-0.1	2	2	0.1	0	-1.08502	2.20102	1
1	3	-0.1	2	2	0.2	0	-1.08502	2.00094	1
1	3	-0.1	2	2	0.3	0	-1.08502	2.00094	1
1	3	-0.1	2	2	0.4	0	-1.08502	1.50072	1
1	3	-0.1	2	2	0.5	0	-1.08502	1.50072	1
1	3	-0.1	2	3	0	0	-1.08502	2.6012	1
1	3	-0.1	2	3	0.1	0	-1.08502	2.50115	1
1	3	-0.1	2	3	0.2	0	-1.08502	2.4011	1
1	3	-0.1	2	3	0.3	0	-1.08502	2.30106	1
1	3	-0.1	2	3	0.4	0	-1.08502	2.00094	1
1	3	-0.1	2	3	0.5	0	-1.08502	2.00094	1
1	3	-0.1	3	1	0	0	-1.08502	2.00094	1
1	3	-0.1	3	1	0.1	0	-1.08502	1.50072	1
1	3	-0.1	3	1	0.2	0	-1.08502	1.50072	1
1	3	-0.1	3	1	0.3	0	-1.08502	1.50072	1
1	3	-0.1	3	1	0.4	0	-1.08502	1.50072	1
1	3	-0.1	3	1	0.5	0	-1.08502	1.50072	1
1	3	-0.1	3	2	0	0	-1.08502	2.4011	1
1	3	-0.1	3	2	0.1	0	-1.08502	2.4011	1
1	3	-0.1	3	2	0.2	0	-1.08502	2.20102	1
1	3	-0.1	3	2	0.3	0	-1.08502	2.00094	1
1	3	-0.1	3	2	0.4	0	-1.08502	1.50072	1
1	3	-0.1	3	2	0.5	0	-1.08502	1.50072	1
1	3	-0.1	3	3	0	0	-1.08502	2.7012	1
1	3	-0.1	3	3	0.1	0	-1.08502	2.6012	1
1	3	-0.1	3	3	0.2	0	-1.08502	2.50115	1
1	3	-0.1	3	3	0.3	0	-1.08502	2.4011	1
1	3	-0.1	3	3	0.4	0	-1.08502	2.20102	1
1	3	-0.1	3	3	0.5	0	-1.08502	2.00094	1
1	3	0	1	1	0	0	-1.08502	1.50072	1
1	3	0	1	1	0.1	0	-1.08502	1.50072	1
1	3	0	1	1	0.2	0	-1.08502	1.50072	1
1	3	0	1	1	0.3	0	-1.08502	1.50072	1
1	3	0	1	1	0.4	0	-1.08502	1.50072	1
1	3	0	1	1	0.5	0	-1.08502	1.50072	1
1	3	0	1	2	0	0	-1.08502	2.20102	1
1	3	0	1	2	0.1	0	-1.08502	2.00094	1
1	3	0	1	2	0.2	0	-1.08502	2.00094	1
1	3	0	1	2	0.3	0	-1.08502	1.50072	1
1	3	0	1	2	0.4	0	-1.08502	1.50072	1
1	3	0	1	2	0.5	0	-1.08502	1.50072	1
1	3	0	1	3	0	0	-1.08502	2.6012	1
1	3	0	1	3	0.1	0	-1.08502	2.4011	1
1	3	0	1	3	0.2	0	-1.08502	2.4011	1
1	3	0	1	3	0.3	0	-1.08502	2.30106	1
1	3	0	1	3	0.4	0	-1.08502	2.00094	1
1	3	0	1	3	0.5	0	-1.08502	1.60352	1
1	3	0	2	1	0	0	-1.08502	1.50072	1
1	3	0	2	1	0.1	0	-1.08502	1.50072	1
1	3	0	2	1	0.2	0	-1.08502	1.50072	1
1	3	0	2	1	0.3	0	-1.08502	1.50072	1
1	3	0	2	1	0.4	0	-1.08502	1.50072	1
1	3	0	2	1	0.5	0	-1.08502	1.50072	1
1	3	0	2	2	0	0	-1.08502	2.4011	1
1	3	0	2	2	0.1	0	-1.08502	2.20102	1
1	3	0	2	2	0.2	0	-1.08502	2.00094	1
1	3	0	2	2	0.3	0	-1.08502	1.60352	1
1	3	0	2	2	0.4	0	-1.08502	1.50072	1
1	3	0	2	2	0.5	0	-1.08502	1.50072	1
1	3	0	2	3	0	0	-1.08502	2.6012	1
1	3	0	2	3	0.1	0	-1.08502	2.50115	1
1	3	0	2	3	0.2	0	-1.08502	2.4011	1
1	3	0	2	3	0.3	0	-1.08502	2.30106	1
1	3	0	2	3	0.4	0	-1.08502	2.00094	1
1	3	0	2	3	0.5	0	-1.08502	2.00094	1
1	3	0	3	1	0	0	-1.08502	1.60352	1
1	3	0	3	1	0.1	0	-1.08502	1.50072	1
1	3	0	3	1	0.2	0	-1.08502	1.50072	1
1	3	0	3	1	0.3	0	-1.08502	1.50072	1
1	3	0	3	1	0.4	0	-1.08502	1.50072	1
1	3	0	3	1	0.5	0	-1.08502	1.50072	1
1	3	0	3	2	0	0	-1.08502	2.4011	1
1	3	0	3	2	0.1	0	-1.08502	2.4011	1
1	3	0	3	2	0.2	0	-1.08502	2.20102	1
1	3	0	3	2	0.3	0	-1.08502	2.00094	1
1	3	0	3	2	0.4	0	-1.08502	1.50072	1
1	3	0	3	2	0.5	0	-1.08502	1.50072	1
1	3	0	3	3	0	0	-1.08502	2.7012	1
1	3	0	3	3	0.1	0	-1.08502	2.6012	1
1	3	0	3	3	0.2	0	-1.08502	2.50115	1
1	3	0	3	3	0.3	0	-1.08502	2.4011	1
1	3	0	3	3	0.4	0	-1.08502	2.20102	1
1	3	0	3	3	0.5	0	-1.08502	2.00094	1
1	3	0.1	1	1	0	0	-1.08502	1.50072	1
1	3	0.1	1	1	0.1	0	-1.08502	1.50072	1
1	3	0.1	1	1	0.2	0	-1.08502	1.50072	1
1	3	0.1	1	1	0.3	0	-1.08502	1.50072	1
1	3	0.1	1	1	0.4	0	-1.08502	1.50072	1
1	3	0.1	1	1	0.5	0	-1.08502	1.40066	1
1	3	0.1	1	2	0	0	-1.08502	2.20102	1
1	3	0.1	1	2	0.1	0	-1.08502	2.00094	1
1	3	0.1	1	2	0.2	0	-1.08502	2.00094	1
1	3	0.1	1	2	0.3	0	-1.08502	1.50072	1
1	3	0.1	1	2	0.4	0	-1.08502	1.50072	1
1	3	0.1	1	2	0.5	0	-1.08502	1.50072	1
1	3	0.1	1	3	0	0	-1.08502	2.6012	1
1	3	0.1	1	3	0.1	0	-1.08502	2.4011	1
1	3	0.1	1	3	0.2	0	-1.08502	2.4011	1
1	3	0.1	1	3	0.3	0	-1.08502	2.30106	1
1	3	0.1	1	3	0.4	0	-1.08502	2.00094	1
1	3	0.1	1	3	0.5	0	-1.08502	1.60352	1
1	3	0.1	2	1	0	0	-1.08502	1.50072	1
1	3	0.1	2	1	0.1	0	-1.08502	1.50072	1
1	3	0.1	2	1	0.2	0	-1.08502	1.50072	1
1	3	0.1	2	1	0.3	0	-1.08502	1.50072	1
1	3	0.1	2	1	0.4	0	-1.08502	1.50072	1
1	3	0.1	2	1	0.5	0	-1.08502	1.40066	1
1	3	0.1	2	2	0	0	-1.08502	2.4011	1
1	3	0.1	2	2	0.1	0	-1.08502	2.20102	1
1	3	0.1	2	2	0.2	0	-1.08502	2.00094	1
1	3	0.1	2	2	0.3	0	-1.08502	1.60352	1
1	3	0.1	2	2	0.4	0	-1.08502	1.50072	1
1	3	0.1	2	2	0.5	0	-1.08502	1.50072	1
1	3	0.1	2	3	0	0	-1.08502	2.6012	1
1	3	0.1	2	3	0.1	0	-1.08502	2.50115	1
1	3	0.1	2	3	0.2	0	-1.08502	2.4011	1
1	3	0.1	2	3	0.3	0	-1.08502	2.30106	1
1	3	0.1	2	3	0.4	0	-1.08502	2.00094	1
1	3	0.1	2	3	0.5	0	-1.08502	1.60352	1
1	3	0.1	3	1	0	0	-1.08502	2.00094	1
1	3	0.1	3	1	0.1	0	-1.08502	1.50072	1
1	3	0.1	3	1	0.2	0	-1.08502	1.50072	1
1	3	0.1	3	1	0.3	0	-1.08502	1.50072	1
1	3	0.1	3	1	0.4	0	-1.08502	1.50072	1
1	3	0.1	3	1	0.5	0	-1.08502	1.50072	1
1	3	0.1	3	2	0	0	-1.08502	2.4011	1
1	3	0.1	3	2	0.1	0	-1.08502	2.4011	1
1	3	0.1	3	2	0.2	0	-1.08502	2.20102	1
1	3	0.1	3	2	0.3	0	-1.08502	2.00094	1
1	3	0.1	3	2	0.4	0	-1.08502	1.50072	1
1	3	0.1	3	2	0.5	0	-1.08502	1.50072	1
1	3	0.1	3	3	0	0	-1.08502	2.7012	1
1	3	0.1	3	3	0.1	0	-1.08502	2.6012	1
1	3	0.1	3	3	0.2	0	-1.08502	2.50115	1
1	3	0.1	3	3	0.3	0	-1.08502	2.4011	1
1	3	0.1	3	3	0.4	0	-1.08502	2.20102	1
1	3	0.1	3	3	0.5	0	-1.08502	2.00094	1
1	3	0.2	1	1	0	0	-1.08502	1.50072	1
1	3	0.2	1	1	0.1	0	-1.08502	1.50072	1
1	3	0.2	1	1	0.2	0	-1.08502	1.50072	1
1	3	0.2	1	1	0.3	0	-1.08502	1.50072	1
1	3	0.2	1	1	0.4	0	-1.08502	1.40066	1
1	3	0.2	1	1	0.5	0	-1.08502	1.40066	1
1	3	0.2	1	2	0	0	-1.08502	2.20102	1
1	3	0.2	1	2	0.1	0	-1.08502	2.00094	1
1	3	0.2	1	2	0.2	0	-1.08502	2.00094	1
1	3	0.2	1	2	0.3	0	-1.08502	1.50072	1
1	3	0.2	1	2	0.4	0	-1.08502	1.50072	1
1	3	0.2	1	2	0.5	0	-1.08502	1.50072	1
1	3	0.2	1	3	0	0	-1.08502	2.6012	1
1	3	0.2	1	3	0.1	0	-1.08502	2.4011	1
1	3	0.2	1	3	0.2	0	-1.08502	2.4011	1
1	3	0.2	1	3	0.3	0	-1.08502	2.20102	1
1	3	0.2	1	3	0.4	0	-1.08502	2.00094	1
1	3	0.2	1	3	0.5	0	-1.08502	1.60352	1
1	3	0.2	2	1	0	0	-1.08502	1.50072	1
1	3	0.2	2	1	0.1	0	-1.08502	1.50072	1
1	3	0.2	2	1	0.2	0	-1.08502	1.50072	1
1	3	0.2	2	1	0.3	0	-1.08502	1.50072	1
1	3	0.2	2	1	0.4	0	-1.08502	1.50072	1
1	3	0.2	2	1	0.5	0	-1.08502	1.40066	1
1	3	0.2	2	2	0	0	-1.08502	2.4011	1
1	3	0.2	2	2	0.1	0	-1.08502	2.20102	1
1	3	0.2	2	2	0.2	0	-1.08502	2.00094	1
1	3	0.2	2	2	0.3	0	-1.08502	2.00094	1
1	3	0.2	2	2	0.4	0	-1.08502	1.50072	1
1	3	0.2	2	2	0.5	0	-1.08502	1.50072	1
1	3	0.2	2	3	0	0	-1.08502	2.6012	1
1	3	0.2	2	3	0.1	0	-1.08502	2.50115	1
1	3	0.2	2	3	0.2	0	-1.08502	2.4011	1
1	3	0.2	2	3	0.3	0	-1.08502	2.30106	1
1	3	0.2	2	3	0.4	0	-1.08502	2.00094	1
1	3	0.2	2	3	0.5	0	-1.08502	2.00094	1
1	3	0.2	3	1	0	0	-1.08502	2.00094	1
1	3	0.2	3	1	0.1	0	-1.08502	1.50072	1
1	3	0.2	3	1	0.2	0	-1.08502	1.50072	1
1	3	0.2	3	1	0.3	0	-1.08502	1.50072	1
1	3	0.2	3	1	0.4	0	-1.08502	1.50072	1
1	3	0.2	3	1	0.5	0	-1.08502	1.50072	1
1	3	0.2	3	2	0	0	-1.08502	2.4011	1
1	3	0.2	3	2	0.1	0	-1.08502	2.4011	1
1	3	0.2	3	2	0.2	0	-1.08502	2.20102	1
1	3	0.2	3	2	0.3	0	-1.08502	2.00094	1
1	3	0.2	3	2	0.4	0	-1.08502	1.50072	1
1	3	0.2	3	2	0.5	0	-1.08502	1.50072	1
1	3	0.2	3	3	0	0	-1.08502	2.7012	1
1	3	0.2	3	3	0.1	0	-1.08502	2.6012	1
1	3	0.2	3	3	0.2	0	-1.08502	2.50115	1
1	3	0.2	3	3	0.3	0	-1.08502	2.4011	1
1	3	0.2	3	3	0.4	0	-1.08502	2.20102	1
1	3	0.2	3	3	0.5	0	-1.08502	2.00094	1
1	3	-0.2	1	1	0	1	0	0	0
1	3	-0.2	1	1	0.1	1	0	0	0
1	3	-0.2	1	1	0.2	1	0	0	0
1	3	-0.2	1	1	0.3	1	0	0	0
1	3	-0.2	1	1	0.4	1	0	0	0
1	3	-0.2	1	1	0.5	1	0	0	0
1	3	-0.2	1	2	0	1	0	0	0
1	3	-0.2	1	2	0.1	1	0	0	0
1	3	-0.2	1	2	0.2	1	0	0	0
1	3	-0.2	1	2	0.3	1	0	0	0
1	3	-0.2	1	2	0.4	1	0	0	0
1	3	-0.2	1	2	0.5	1	0	0	0
1	3	-0.2	1	3	0	1	-0.0271741	2.20099	1
1	3	-0.2	1	3	0.1	1	-0.788162	2.10096	1
1	3	-0.2	1	3	0.2	1	-1.33568	1.60073	1
1	3	-0.2	1	3	0.3	1	0	0	0
1	3	-0.2	1	3	0.4	1	0	0	0
1	3	-0.2	1	3	0.5	1	0	0	0
1	3	-0.2	2	1	0	1	0	0	0
1	3	-0.2	2	1	0.1	1	0	0	0
1	3	-0.2	2	1	0.2	1	0	0	0
1	3	-0.2	2	1	0.3	1	0	0	0
1	3	-0.2	2	1	0.4	1	0	0	0
1	3	-0.2	2	1	0.5	1	0	0	0
1	3	-0.2	2	2	0	1	-1.81359	1.70077	1
1	3	-0.2	2	2	0.1	1	0	0	0
1	3	-0.2	2	2	0.2	1	0	0	0
1	3	-0.2	2	2	0.3	1	0	0	0
1	3	-0.2	2	2	0.4	1	0	0	0
1	3	-0.2	2	2	0.5	1	0	0	0
1	3	-0.2	2	3	0	1	-0.72427	2.40105	1
1	3	-0.2	2	3	0.1	1	-0.0271741	2.20099	1
1	3	-0.2	2	3	0.2	1	-0.788162	2.10096	1
1	3	-0.2	2	3	0.3	1	-1.81359	1.50069	1
1	3	-0.2	2	3	0.4	1	0	0	0
1	3	-0.2	2	3	0.5	1	0	0	0
1	3	-0.2	3	1	0	1	0	0	0
1	3	-0.2	3	1	0.1	1	0	0	0
1	3	-0.2	3	1	0.2	1	0	0	0
1	3	-0.2	3	1	0.3	1	0	0	0
1	3	-0.2	3	1	0.4	1	0	0	0
1	3	-0.2	3	1	0.5	1	0	0	0
1	3	-0.2	3	2	0	1	-0.788162	2.10096	1
1	3	-0.2	3	2	0.1	1	-1.81359	1.70077	1
1	3	-0.2	3	2	0.2	1	0	0	0
1	3	-0.2	3	2	0.3	1	0	0	0
1	3	-0.2	3	2	0.4	1	0	0	0
1	3	-0.2	3	2	0.5	1	0	0	0
1	3	-0.2	3	3	0	1	1.45829	2.6012	1
1	3	-0.2	3	3	0.1	1	-0.72427	2.40105	1
1	3	-0.2	3	3	0.2	1	-0.0271741	2.20099	1
1	3	-0.2	3	3	0.3	1	-1.33568	2.00089	1
1	3	-0.2	3	3	0.4	1	0	0	0
1	3	-0.2	3	3	0.5	1	0	0	0
1	3	-0.1	1	1	0	1	0	0	0
1	3	-0.1	1	1	0.1	1	0	0	0
1	3	-0.1	1	1	0.2	1	0	0	0
1	3	-0.1	1	1	0.3	1	0	0	0
1	3	-0.1	1	1	0.4	1	0	0	0
1	3	-0.1	1	1	0.5	1	0	0	0
1	3	-0.1	1	2	0	1	-0.788162	1.7008	1
1	3	-0.1	1	2	0.1	1	-1.81359	1.50069	1
1	3	-0.1	1	2	0.2	1	0	0	0
1	3	-0.1	1	2	0.3	1	0	0	0
1	3	-0.1	1	2	0.4	1	0	0	0
1	3	-0.1	1	2	0.5	1	0	0	0
1	3	-0.1	1	3	0	1	1.45829	2.4011	1
1	3	-0.1	1	3	0.1	1	-0.72427	2.301	1
1	3	-0.1	1	3	0.2	1	-0.0271741	2.00091	1
1	3	-0.1	1	3	0.3	1	-0.788162	1.7008	1
1	3	-0.1	1	3	0.4	1	-1.81359	1.00047	1
1	3	-0.1	1	3	0.5	1	0	0	0
1	3	-0.1	2	1	0	1	0	0	0
1	3	-0.1	2	1	0.1	1	0	0	0
1	3	-0.1	2	1	0.2	1	0	0	0
1	3	-0.1	2	1	0.3	1	0	0	0
1	3	-0.1	2	1	0.4	1	0	0	0
1	3	-0.1	2	1	0.5	1	0	0	0
1	3	-0.1	2	2	0	1	-0.0271741	2.10095	1
1	3	-0.1	2	2	0.1	1	-0.788162	1.7008	1
1	3	-0.1	2	2	0.2	1	-1.81359	1.50069	1
1	3	-0.1	2	2	0.3	1	0	0	0
1	3	-0.1	2	2	0.4	1	0	0	0
1	3	-0.1	2	2	0.5	1	0	0	0
1	3	-0.1	2	3	0	1	1.45829	2.50115	1
1	3	-0.1	2	3	0.1	1	1.45829	2.4011	1
1	3	-0.1	2	3	0.2	1	-0.72427	2.301	1
1	3	-0.1	2	3	0.3	1	-0.0271741	2.00091	1
1	3	-0.1	2	3	0.4	1	-1.33568	1.60073	1
1	3	-0.1	2	3	0.5	1	0	0	0
1	3	-0.1	3	1	0	1	0	0	0
1	3	-0.1	3	1	0.1	1	0	0	0
1	3	-0.1	3	1	0.2	1	0	0	0
1	3	-0.1	3	1	0.3	1	0	0	0
1	3	-0.1	3	1	0.4	1	0	0	0
1	3	-0.1	3	1	0.5	1	0	0	0
1	3	-0.1	3	2	0	1	-0.72427	2.301	1
1	3	-0.1	3	2	0.1	1	-0.0271741	2.20099	1
1	3	-0.1	3	2	0.2	1	-0.788162	1.7008	1
1	3	-0.1	3	2	0.3	1	-1.81359	1.50069	1
1	3	-0.1	3	2	0.4	1	0	0	0
1	3	-0.1	3	2	0.5	1	0	0	0
1	3	-0.1	3	3	0	1	1.45829	2.6012	1
1	3	-0.1	3	3	0.1	1	1.45829	2.50115	1
1	3	-0.1	3	3	0.2	1	1.45829	2.4011	1
1	3	-0.1	3	3	0.3	1	-0.0271741	2.20099	1
1	3	-0.1	3	3	0.4	1	-0.788162	1.7008	1
1	3	-0.1	3	3	0.5	1	-1.81359	1.00047	1
1	3	0	1	1	0	1	0	0	0
1	3	0	1	1	0.1	1	0	0	0
1	3	0	1	1	0.2	1	0	0	0
1	3	0	1	1	0.3	1	0	0	0
1	3	0	1	1	0.4	1	0	0	0
1	3	0	1	1	0.5	1	0	0	0
1	3	0	1	2	0	1	-0.72427	1.90084	1
1	3	0	1	2	0.1	1	-0.0271741	1.80083	1
1	3	0	1	2	0.2	1	-0.788162	1.20058	1
1	3	0	1	2	0.3	1	-1.81359	1.00047	1
1	3	0	1	2	0.4	1	0	0	0
1	3	0	1	2	0.5	1	0	0	0
1	3	0	1	3	0	1	1.45829	2.50115	1
1	3	0	1	3	0.1	1	1.45829	2.4011	1
1	3	0	1	3	0.2	1	1.45829	2.4011	1
1	3	0	1	3	0.3	1	-0.72427	2.00086	1
1	3	0	1	3	0.4	1	-0.0271741	1.80083	1
1	3	0	1	3	0.5	1	-1.33568	1.10051	1
1	3	0	2	1	0	1	-1.81359	1.00047	1
1	3	0	2	1	0.1	1	0	0	0
1	3	0	2	1	0.2	1	0	0	0
1	3	0	2	1	0.3	1	0	0	0
1	3	0	2	1	0.4	1	0	0	0
1	3	0	2	1	0.5	1	0	0	0
1	3	0	2	2	0	1	1.45829	2.4011	1
1	3	0	2	2	0.1	1	-0.72427	2.10092	1
1	3	0	2	2	0.2	1	-0.0271741	1.80083	1
1	3	0	2	2	0.3	1	-0.788162	1.20058	1
1	3	0	2	2	0.4	1	-1.81359	1.00047	1
1	3	0	2	2	0.5	1	0	0	0
1	3	0	2	3	0	1	1.45829	2.6012	1
1	3	0	2	3	0.1	1	1.45829	2.50115	1
1	3	0	2	3	0.2	1	1.45829	2.4011	1
1	3	0	2	3	0.3	1	1.45829	2.30106	1
1	3	0	2	3	0.4	1	-0.0271741	1.80083	1
1	3	0	2	3	0.5	1	-0.788162	1.20058	1
1	3	0	3	1	0	1	-0.788162	1.7008	1
1	3	0	3	1	0.1	1	-1.81359	1.00047	1
1	3	0	3	1	0.2	1	-1.81359	1.00047	1
1	3	0	3	1	0.3	1	0	0	0
1	3	0	3	1	0.4	1	0	0	0
1	3	0	3	1	0.5	1	0	0	0
1	3	0	3	2	0	1	1.45829	2.4011	1
1	3	0	3	2	0.1	1	1.45829	2.4011	1
1	3	0	3	2	0.2	1	-0.72427	2.10092	1
1	3	0	3	2	0.3	1	-0.0271741	1.80083	1
1	3	0	3	2	0.4	1	-1.33568	1.10051	1
1	3	0	3	2	0.5	1	0	0	0
1	3	0	3	3	0	1	1.45829	2.6012	1
1	3	0	3	3	0.1	1	1.45829	2.6012	1
1	3	0	3	3	0.2	1	1.45829	2.4011	1
1	3	0	3	3	0.3	1	1.45829	2.4011	1
1	3	0	3	3	0.4	1	-0.72427	2.10092	1
1	3	0	3	3	0.5	1	-0.0271741	1.80083	1
1	3	0.1	1	1	0	1	-1.81359	1.00047	1
1	3	0.1	1	1	0.1	1	-1.81359	1.00047	1
1	3	0.1	1	1	0.2	1	0	0	0
1	3	0.1	1	1	0.3	1	0	0	0
1	3	0.1	1	1	0.4	1	0	0	0
1	3	0.1	1	1	0.5	1	0	0	0
1	3	0.1	1	2	0	1	1.45829	2.20102	1
1	3	0.1	1	2	0.1	1	1.45829	2.00094	1
1	3	0.1	1	2	0.2	1	-0.72427	1.90084	1
1	3	0.1	1	2	0.3	1	-0.0271741	1.30061	1
1	3	0.1	1	2	0.4	1	-0.788162	1.20058	1
1	3	0.1	1	2	0.5	1	-1.81359	1.00047	1
1	3	0.1	1	3	0	1	1.45829	2.50115	1
1	3	0.1	1	3	0.1	1	1.45829	2.4011	1
1	3	0.1	1	3	0.2	1	1.45829	2.4011	1
1	3	0.1	1	3	0.3	1	1.45829	2.20102	1
1	3	0.1	1	3	0.4	1	-0.72427	1.90084	1
1	3	0.1	1	3	0.5	1	-0.0271741	1.30061	1
1	3	0.1	2	1	0	1	-0.0271741	1.30061	1
1	3	0.1	2	1	0.1	1	-0.788162	1.20058	1
1	3	0.1	2	1	0.2	1	-1.81359	1.00047	1
1	3	0.1	2	1	0.3	1	-1.81359	1.00047	1
1	3	0.1	2	1	0.4	1	0	0	0
1	3	0.1	2	1	0.5	1	0	0	0
1	3	0.1	2	2	0	1	1.45829	2.4011	1
1	3	0.1	2	2	0.1	1	1.45829	2.20102	1
1	3	0.1	2	2	0.2	1	1.45829	2.00094	1
1	3	0.1	2	2	0.3	1	-0.72427	1.90084	1
1	3	0.1	2	2	0.4	1	-0.0271741	1.30061	1
1	3	0.1	2	2	0.5	1	-1.81359	1.00047	1
1	3	0.1	2	3	0	1	1.45829	2.6012	1
1	3	0.1	2	3	0.1	1	1.45829	2.50115	1
1	3	0.1	2	3	0.2	1	1.45829	2.4011	1
1	3	0.1	2	3	0.3	1	1.45829	2.30106	1
1	3	0.1	2	3	0.4	1	1.45829	2.00094	1
1	3	0.1	2	3	0.5	1	-0.72427	1.90084	1
1	3	0.1	3	1	0	1	-0.72427	1.90084	1
1	3	0.1	3	1	0.1	1	-0.0271741	1.30061	1
1	3	0.1	3	1	0.2	1	-0.788162	1.20058	1
1	3	0.1	3	1	0.3	1	-1.81359	1.00047	1
1	3	0.1	3	1	0.4	1	-1.81359	1.00047	1
1	3	0.1	3	1	0.5	1	0	0	0
1	3	0.1	3	2	0	1	1.45829	2.4011	1
1	3	0.1	3	2	0.1	1	1.45829	2.4011	1
1	3	0.1	3	2	0.2	1	1.45829	2.20102	1
1	3	0.1	3	2	0.3	1	1.45829	2.00094	1
1	3	0.1	3	2	0.4	1	-0.0271741	1.30061	1
1	3	0.1	3	2	0.5	1	-0.788162	1.20058	1
1	3	0.1	3	3	0	1	1.45829	2.7012	1
1	3	0.1	3	3	0.1	1	1.45829	2.6012	1
1	3	0.1	3	3	0.2	1	1.45829	2.50115	1
1	3	0.1	3	3	0.3	1	1.45829	2.4011	1
1	3	0.1	3	3	0.4	1	1.45829	2.20102	1
1	3	0.1	3	3	0.5	1	-0.72427	1.90084	1
1	3	0.2	1	1	0	1	-0.0271741	1.30061	1
1	3	0.2	1	1	0.1	1	-0.0271741	1.30061	1
1	3	0.2	1	1	0.2	1	-0.788162	1.20058	1
1	3	0.2	1	1	0.3	1	-1.81359	1.00047	1
1	3	0.2	1	1	0.4	1	-1.81359	1.00047	1
1	3	0.2	1	1	0.5	1	0	0	0
1	3	0.2	1	2	0	1	1.45829	2.20102	1
1	3	0.2	1	2	0.1	1	1.45829	2.00094	1
1	3	0.2	1	2	0.2	1	1.45829	2.00094	1
1	3	0.2	1	2	0.3	1	1.45829	1.50072	1
1	3	0.2	1	2	0.4	1	-0.72427	1.40062	1
1	3	0.2	1	2	0.5	1	-0.0271741	1.30061	1
1	3	0.2	1	3	0	1	1.45829	2.50115	1
1	3	0.2	1	3	0.1	1	1.45829	2.4011	1
1	3	0.2	1	3	0.2	1	1.45829	2.4011	1
1	3	0.2	1	3	0.3	1	1.45829	2.20102	1
1	3	0.2	1	3	0.4	1	1.45829	2.00094	1
1	3	0.2	1	3	0.5	1	1.45829	1.50072	1
1	3	0.2	2	1	0	1	1.45829	1.50072	1
1	3	0.2	2	1	0.1	1	-0.72427	1.40062	1
1	3	0.2	2	1	0.2	1	-0.0271741	1.30061	1
1	3	0.2	2	1	0.3	1	-0.0271741	1.30061	1
1	3	0.2	2	1	0.4	1	-1.81359	1.00047	1
1	3	0.2	2	1	0.5	1	-1.81359	1.00047	1
1	3	0.2	2	2	0	1	1.45829	2.4011	1
1	3	0.2	2	2	0.1	1	1.45829	2.20102	1
1	3	0.2	2	2	0.2	1	1.45829	2.00094	1
1	3	0.2	2	2	0.3	1	1.45829	2.00094	1
1	3	0.2	2	2	0.4	1	-0.72427	1.40062	1
1	3	0.2	2	2	0.5	1	-0.0271741	1.30061	1
1	3	0.2	2	3	0	1	1.45829	2.6012	1
1	3	0.2	2	3	0.1	1	1.45829	2.50115	1
1	3	0.2	2	3	0.2	1	1.45829	2.4011	1
1	3	0.2	2	3	0.3	1	1.45829	2.30106	1
1	3	0.2	2	3	0.4	1	1.45829	2.00094	1
1	3	0.2	2	3	0.5	1	1.45829	2.00094	1
1	3	0.2	3	1	0	1	1.45829	2.00094	1
1	3	0.2	3	1	0.1	1	1.45829	1.50072	1
1	3	0.2	3	1	0.2	1	-0.72427	1.40062	1
1	3	0.2	3	1	0.3	1	-0.0271741	1.30061	1
1	3	0.2	3	1	0.4	1	-0.788162	1.20058	1
1	3	0.2	3	1	0.5	1	-1.81359	1.00047	1
1	3	0.2	3	2	0	1	1.45829	2.4011	1
1	3	0.2	3	2	0.1	1	1.45829	2.4011	1
1	3	0.2	3	2	0.2	1	1.45829	2.20102	1
1	3	0.2	3	2	0.3	1	1.45829	2.00094	1
1	3	0.2	3	2	0.4	1	1.45829	1.50072	1
1	3	0.2	3	2	0.5	1	-0.72427	1.40062	1
1	3	0.2	3	3	0	1	1.45829	2.7012	1
1	3	0.2	3	3	0.1	1	1.45829	2.6012	1
1	3	0.2	3	3	0.2	1	1.45829	2.50115	1
1	3	0.2	3	3	0.3	1	1.45829	2.4011	1
1	3	0.2	3	3	0.4	1	1.45829	2.20102	1
1	3	0.2	3	3	0.5	1	1.45829	2.00094	1
1	3	0.2	3	3	0.1	1	1.45829	1.90089	1
1	3	0.2	3	3	0.2	1	1.45829	1.80086	1
1	3	0.2	3	3	0.3	1	1.45829	1.70078	1
1	3	0.2	3	3	0.4	1	1.45829	1.50072	1
1	3	0.2	3	3	0.5	1	1.45829	1.30061	1
1	3	0.2	3	3	0.4	1	1.45829	1.50072	1
1	3	0.2	3	3	0.5	1	1.45829	1.30061	1
1	1	-0.2	1	1	0	2	0	0	0
1	1	-0.2	1	1	0.1	2	0	0	0
1	1	-0.2	1	1	0.2	2	0	0	0
1	1	-0.2	1	1	0.3	2	0	0	0
1	1	-0.2	1	1	0.4	2	0	0	0
1	1	-0.2	1	1	0.5	2	0	0	0
1	1	-0.2	1	2	0	2	0	0	0
1	1	-0.2	1	2	0.1	2	0	0	0
1	1	-0.2	1	2	0.2	2	0	0	0
1	1	-0.2	1	2	0.3	2	0	0	0
1	1	-0.2	1	2	0.4	2	0	0	0
1	1	-0.2	1	2	0.5	2	0	0	0
1	1	-0.2	1	3	0	2	0.677987	2.39923	1
1	1	-0.2	1	3	0.1	2	0	0	0
1	1	-0.2	1	3	0.2	2	0	0	0
1	1	-0.2	1	3	0.3	2	0	0	0
1	1	-0.2	1	3	0.4	2	0	0	0
1	1	-0.2	1	3	0.5	2	0	0	0
1	1	-0.2	2	1	0	2	0	0	0
1	1	-0.2	2	1	0.1	2	0	0	0
1	1	-0.2	2	1	0.2	2	0	0	0
1	1	-0.2	2	1	0.3	2	0	0	0
1	1	-0.2	2	1	0.4	2	0	0	0
1	1	-0.2	2	1	0.5	2	0	0	0
1	1	-0.2	2	2	0	2	0	0	0
1	1	-0.2	2	2	0.1	2	0	0	0
1	1	-0.2	2	2	0.2	2	0	0	0
1	1	-0.2	2	2	0.3	2	0	0	0
1	1	-0.2	2	2	0.4	2	0	0	0
1	1	-0.2	2	2	0.5	2	0	0	0
1	1	-0.2	2	3	0	2	1.55992	2.99907	1
1	1	-0.2	2	3	0.1	2	-0.10076	1.09964	1
1	1	-0.2	2	3	0.2	2	0	0	0
1	1	-0.2	2	3	0.3	2	0	0	0
1	1	-0.2	2	3	0.4	2	0	0	0
1	1	-0.2	2	3	0.5	2	0	0	0
1	1	-0.2	3	1	0	2	0	0	0
1	1	-0.2	3	1	0.1	2	0	0	0
1	1	-0.2	3	1	0.2	2	0	0	0
1	1	-0.2	3	1	0.3	2	0	0	0
1	1	-0.2	3	1	0.4	2	0	0	0
1	1	-0.2	3	1	0.5	2	0	0	0
1	1	-0.2	3	2	0	2	0	0	0
1	1	-0.2	3	2	0.1	2	0	0	0
1	1	-0.2	3	2	0.2	2	0	0	0
1	1	-0.2	3	2	0.3	2	0	0	0
1	1	-0.2	3	2	0.4	2	0	0	0
1	1	-0.2	3	2	0.5	2	0	0	0
1	1	-0.2	3	3	0	2	2.71481	3.39894	1
1	1	-0.2	3	3	0.1	2	0.677987	2.69912	1
1	1	-0.2	3	3	0.2	2	0	0	0
1	1	-0.2	3	3	0.3	2	0	0	0
1	1	-0.2	3	3	0.4	2	0	0	0
1	1	-0.2	3	3	0.5	2	0	0	0
1	1	-0.1	1	1	0	2	0	0	0
1	1	-0.1	1	1	0.1	2	0	0	0
1	1	-0.1	1	1	0.2	2	0	0	0
1	1	-0.1	1	1	0.3	2	0	0	0
1	1	-0.1	1	1	0.4	2	0	0	0
1	1	-0.1	1	1	0.5	2	0	0	0
1	1	-0.1	1	2	0	2	0	0	0
1	1	-0.1	1	2	0.1	2	0	0	0
1	1	-0.1	1	2	0.2	2	0	0	0
1	1	-0.1	1	2	0.3	2	0	0	0
1	1	-0.1	1	2	0.4	2	0	0	0
1	1	-0.1	1	2	0.5	2	0	0	0
1	1	-0.1	1	3	0	2	2.71481	3.29897	1
1	1	-0.1	1	3	0.1	2	1.07982	2.49919	1
1	1	-0.1	1	3	0.2	2	0	0	0
1	1	-0.1	1	3	0.3	2	0	0	0
1	1	-0.1	1	3	0.4	2	0	0	0
1	1	-0.1	1	3	0.5	2	0	0	0
1	1	-0.1	2	1	0	2	0	0	0
1	1	-0.1	2	1	0.1	2	0	0	0
1	1	-0.1	2	1	0.2	2	0	0	0
1	1	-0.1	2	1	0.3	2	0	0	0
1	1	-0.1	2	1	0.4	2	0	0	0
1	1	-0.1	2	1	0.5	2	0	0	0
1	1	-0.1	2	2	0	2	0	0	0
1	1	-0.1	2	2	0.1	2	0	0	0
1	1	-0.1	2	2	0.2	2	0	0	0
1	1	-0.1	2	2	0.3	2	0	0	0
1	1	-0.1	2	2	0.4	2	0	0	0
1	1	-0.1	2	2	0.5	2	0	0	0
1	1	-0.1	2	3	0	2	2.71481	3.29897	1
1	1	-0.1	2	3	0.1	2	1.55992	2.99907	1
1	1	-0.1	2	3	0.2	2	0	0	0
1	1	-0.1	2	3	0.3	2	0	0	0
1	1	-0.1	2	3	0.4	2	0	0	0
1	1	-0.1	2	3	0.5	2	0	0	0
1	1	-0.1	3	1	0	2	0	0	0
1	1	-0.1	3	1	0.1	2	0	0	0
1	1	-0.1	3	1	0.2	2	0	0	0
1	1	-0.1	3	1	0.3	2	0	0	0
1	1	-0.1	3	1	0.4	2	0	0	0
1	1	-0.1	3	1	0.5	2	0	0	0
1	1	-0.1	3	2	0	2	0	0	0
1	1	-0.1	3	2	0.1	2	0	0	0
1	1	-0.1	3	2	0.2	2	0	0	0
1	1	-0.1	3	2	0.3	2	0	0	0
1	1	-0.1	3	2	0.4	2	0	0	0
1	1	-0.1	3	2	0.5	2	0	0	0
1	1	-0.1	3	3	0	2	2.71481	3.39894	1
1	1	-0.1	3	3	0.1	2	2.71481	3.29897	1
1	1	-0.1	3	3	0.2	2	0.677987	2.49923	1
1	1	-0.1	3	3	0.3	2	0	0	0
1	1	-0.1	3	3	0.4	2	0	0	0
1	1	-0.1	3	3	0.5	2	0	0	0
1	1	0	1	1	0	2	0	0	0
1	1	0	1	1	0.1	2	0	0	0
1	1	0	1	1	0.2	2	0	0	0
1	1	0	1	1	0.3	2	0	0	0
1	1	0	1	1	0.4	2	0	0	0
1	1	0	1	1	0.5	2	0	0	0
1	1	0	1	2	0	2	0	0	0
1	1	0	1	2	0.1	2	0	0	0
1	1	0	1	2	0.2	2	0	0	0
1	1	0	1	2	0.3	2	0	0	0
1	1	0	1	2	0.4	2	0	0	0
1	1	0	1	2	0.5	2	0	0	0
1	1	0	1	3	0	2	2.71481	3.29897	1
1	1	0	1	3	0.1	2	2.71481	3.199	1
1	1	0	1	3	0.2	2	0.677987	2.39923	1
1	1	0	1	3	0.3	2	0	0	0
1	1	0	1	3	0.4	2	0	0	0
1	1	0	1	3	0.5	2	0	0	0
1	1	0	2	1	0	2	0	0	0
1	1	0	2	1	0.1	2	0	0	0
1	1	0	2	1	0.2	2	0	0	0
1	1	0	2	1	0.3	2	0	0	0
1	1	0	2	1	0.4	2	0	0	0
1	1	0	2	1	0.5	2	0	0	0
1	1	0	2	2	0	2	0	0	0
1	1	0	2	2	0.1	2	0	0	0
1	1	0	2	2	0.2	2	0	0	0
1	1	0	2	2	0.3	2	0	0	0
1	1	0	2	2	0.4	2	0	0	0
1	1	0	2	2	0.5	2	0	0	0
1	1	0	2	3	0	2	3.25221	3.4989	1
1	1	0	2	3	0.1	2	2.71481	3.29897	1
1	1	0	2	3	0.2	2	1.55992	2.79913	1
1	1	0	2	3	0.3	2	0	0	0
1	1	0	2	3	0.4	2	0	0	0
1	1	0	2	3	0.5	2	0	0	0
1	1	0	3	1	0	2	0	0	0
1	1	0	3	1	0.1	2	0	0	0
1	1	0	3	1	0.2	2	0	0	0
1	1	0	3	1	0.3	2	0	0	0
1	1	0	3	1	0.4	2	0	0	0
1	1	0	3	1	0.5	2	0	0	0
1	1	0	3	2	0	2	-0.462073	1.09963	1
1	1	0	3	2	0.1	2	0	0	0
1	1	0	3	2	0.2	2	0	0	0
1	1	0	3	2	0.3	2	0	0	0
1	1	0	3	2	0.4	2	0	0	0
1	1	0	3	2	0.5	2	0	0	0
1	1	0	3	3	0	2	3.25221	3.59887	1
1	1	0	3	3	0.1	2	2.71481	3.39894	1
1	1	0	3	3	0.2	2	1.55992	2.99907	1
1	1	0	3	3	0.3	2	0	0	0
1	1	0	3	3	0.4	2	0	0	0
1	1	0	3	3	0.5	2	0	0	0
1	1	0.1	1	1	0	2	0	0	0
1	1	0.1	1	1	0.1	2	0	0	0
1	1	0.1	1	1	0.2	2	0	0	0
1	1	0.1	1	1	0.3	2	0	0	0
1	1	0.1	1	1	0.4	2	0	0	0
1	1	0.1	1	1	0.5	2	0	0	0
1	1	0.1	1	2	0	2	0	0	0
1	1	0.1	1	2	0.1	2	0	0	0
1	1	0.1	1	2	0.2	2	0	0	0
1	1	0.1	1	2	0.3	2	0	0	0
1	1	0.1	1	2	0.4	2	0	0	0
1	1	0.1	1	2	0.5	2	0	0	0
1	1	0.1	1	3	0	2	3.25221	3.4989	1
1	1	0.1	1	3	0.1	2	2.71481	3.29897	1
1	1	0.1	1	3	0.2	2	2.71481	3.099	1
1	1	0.1	1	3	0.3	2	0	0	0
1	1	0.1	1	3	0.4	2	0	0	0
1	1	0.1	1	3	0.5	2	0	0	0
1	1	0.1	2	1	0	2	0	0	0
1	1	0.1	2	1	0.1	2	0	0	0
1	1	0.1	2	1	0.2	2	0	0	0
1	1	0.1	2	1	0.3	2	0	0	0
1	1	0.1	2	1	0.4	2	0	0	0
1	1	0.1	2	1	0.5	2	0	0	0
1	1	0.1	2	2	0	2	1.07982	2.59919	1
1	1	0.1	2	2	0.1	2	0	0	0
1	1	0.1	2	2	0.2	2	0	0	0
1	1	0.1	2	2	0.3	2	0	0	0
1	1	0.1	2	2	0.4	2	0	0	0
1	1	0.1	2	2	0.5	2	0	0	0
1	1	0.1	2	3	0	2	3.78516	3.69886	1
1	1	0.1	2	3	0.1	2	3.25221	3.4989	1
1	1	0.1	2	3	0.2	2	2.71481	3.199	1
1	1	0.1	2	3	0.3	2	1.55992	2.69918	1
1	1	0.1	2	3	0.4	2	0	0	0
1	1	0.1	2	3	0.5	2	0	0	0
1	1	0.1	3	1	0	2	0	0	0
1	1	0.1	3	1	0.1	2	0	0	0
1	1	0.1	3	1	0.2	2	0	0	0
1	1	0.1	3	1	0.3	2	0	0	0
1	1	0.1	3	1	0.4	2	0	0	0
1	1	0.1	3	1	0.5	2	0	0	0
1	1	0.1	3	2	0	2	1.55992	2.99907	1
1	1	0.1	3	2	0.1	2	-0.118381	0.99969	1
1	1	0.1	3	2	0.2	2	0	0	0
1	1	0.1	3	2	0.3	2	0	0	0
1	1	0.1	3	2	0.4	2	0	0	0
1	1	0.1	3	2	0.5	2	0	0	0
1	1	0.1	3	3	0	2	3.78516	3.79886	1
1	1	0.1	3	3	0.1	2	3.25221	3.4989	1
1	1	0.1	3	3	0.2	2	2.71481	3.29897	1
1	1	0.1	3	3	0.3	2	1.55992	2.89907	1
1	1	0.1	3	3	0.4	2	0	0	0
1	1	0.1	3	3	0.5	2	0	0	0
1	1	0.2	1	1	0	2	0	0	0
1	1	0.2	1	1	0.1	2	0	0	0
1	1	0.2	1	1	0.2	2	0	0	0
1	1	0.2	1	1	0.3	2	0	0	0
1	1	0.2	1	1	0.4	2	0	0	0
1	1	0.2	1	1	0.5	2	0	0	0
1	1	0.2	1	2	0	2	1.55992	2.69918	1
1	1	0.2	1	2	0.1	2	0	0	0
1	1	0.2	1	2	0.2	2	0	0	0
1	1	0.2	1	2	0.3	2	0	0	0
1	1	0.2	1	2	0.4	2	0	0	0
1	1	0.2	1	2	0.5	2	0	0	0
1	1	0.2	1	3	0	2	3.78516	3.59889	1
1	1	0.2	1	3	0.1	2	3.25221	3.39893	1
1	1	0.2	1	3	0.2	2	2.71481	3.199	1
1	1	0.2	1	3	0.3	2	1.55992	2.69918	1
1	1	0.2	1	3	0.4	2	0	0	0
1	1	0.2	1	3	0.5	2	0	0	0
1	1	0.2	2	1	0	2	0	0	0
1	1	0.2	2	1	0.1	2	0	0	0
1	1	0.2	2	1	0.2	2	0	0	0
1	1	0.2	2	1	0.3	2	0	0	0
1	1	0.2	2	1	0.4	2	0	0	0
1	1	0.2	2	1	0.5	2	0	0	0
1	1	0.2	2	2	0	2	2.71481	3.099	1
1	1	0.2	2	2	0.1	2	1.55992	1.19964	1
1	1	0.2	2	2	0.2	2	0	0	0
1	1	0.2	2	2	0.3	2	0	0	0
1	1	0.2	2	2	0.4	2	0	0	0
1	1	0.2	2	2	0.5	2	0	0	0
1	1	0.2	2	3	0	2	4.42304	3.89885	1
1	1	0.2	2	3	0.1	2	3.78516	3.59889	1
1	1	0.2	2	3	0.2	2	2.71481	3.29897	1
1	1	0.2	2	3	0.3	2	2.71481	3.099	1
1	1	0.2	2	3	0.4	2	0	0	0
1	1	0.2	2	3	0.5	2	0	0	0
1	1	0.2	3	1	0	2	0	0	0
1	1	0.2	3	1	0.1	2	0	0	0
1	1	0.2	3	1	0.2	2	0	0	0
1	1	0.2	3	1	0.3	2	0	0	0
1	1	0.2	3	1	0.4	2	0	0	0
1	1	0.2	3	1	0.5	2	0	0	0
1	1	0.2	3	2	0	2	2.71481	3.29897	1
1	1	0.2	3	2	0.1	2	1.55992	2.89907	1
1	1	0.2	3	2	0.2	2	0	0	0
1	1	0.2	3	2	0.3	2	0	0	0
1	1	0.2	3	2	0.4	2	0	0	0
1	1	0.2	3	2	0.5	2	0	0	0
1	1	0.2	3	3	0	2	5.11835	4.09869	1
1	1	0.2	3	3	0.1	2	3.78516	3.59889	1
1	1	0.2	3	3	0.2	2	3.25221	3.39893	1
1	1	0.2	3	3	0.3	2	2.71481	3.199	1
1	1	0.2	3	3	0.4	2	1.55992	1.19964	1
1	1	0.2	3	3	0.5	2	0	0	0
1	2	-0.2	1	1	0	2	2.99063	2.20353	1
1	2	-0.2	1	1	0.1	2	2.99063	2.20353	1
1	2	-0.2	1	1	0.2	2	2.58825	2.10337	1
1	2	-0.2	1	1	0.3	2	0.653717	1.4022	1
1	2	-0.2	1	1	0.4	2	-0.302363	1.10177	1
1	2	-0.2	1	1	0.5	2	0	0	0
1	2	-0.2	1	2	0	2	4.75984	3.00481	1
1	2	-0.2	1	2	0.1	2	4.31134	2.50403	1
1	2	-0.2	1	2	0.2	2	3.90957	2.40384	1
1	2	-0.2	1	2	0.3	2	3.90957	2.40384	1
1	2	-0.2	1	2	0.4	2	3.38091	2.3037	1
1	2	-0.2	1	2	0.5	2	2.99063	2.20353	1
1	2	-0.2	1	3	0	2	8.44481	4.00643	1
1	2	-0.2	1	3	0.1	2	6.86263	3.50567	1
1	2	-0.2	1	3	0.2	2	6.86263	3.4055	1
1	2	-0.2	1	3	0.3	2	5.23174	3.10497	1
1	2	-0.2	1	3	0.4	2	4.31134	2.50403	1
1	2	-0.2	1	3	0.5	2	3.90957	2.40384	1
1	2	-0.2	2	1	0	2	3.38091	2.3037	1
1	2	-0.2	2	1	0.1	2	3.38091	2.3037	1
1	2	-0.2	2	1	0.2	2	2.99063	2.20353	1
1	2	-0.2	2	1	0.3	2	2.58825	2.10337	1
1	2	-0.2	2	1	0.4	2	0.653717	1.4022	1
1	2	-0.2	2	1	0.5	2	-0.302363	1.10177	1
1	2	-0.2	2	2	0	2	5.23174	3.10497	1
1	2	-0.2	2	2	0.1	2	4.75984	3.00481	1
1	2	-0.2	2	2	0.2	2	4.31134	2.50403	1
1	2	-0.2	2	2	0.3	2	3.90957	2.40384	1
1	2	-0.2	2	2	0.4	2	3.38091	2.3037	1
1	2	-0.2	2	2	0.5	2	2.99063	2.20353	1
1	2	-0.2	2	3	0	2	8.81418	4.10668	1
1	2	-0.2	2	3	0.1	2	8.44481	3.90628	1
1	2	-0.2	2	3	0.2	2	6.86263	3.50567	1
1	2	-0.2	2	3	0.3	2	5.23174	3.10497	1
1	2	-0.2	2	3	0.4	2	4.31134	2.50403	1
1	2	-0.2	2	3	0.5	2	3.90957	2.40384	1
1	2	-0.2	3	1	0	2	3.90957	2.40384	1
1	2	-0.2	3	1	0.1	2	3.38091	2.3037	1
1	2	-0.2	3	1	0.2	2	3.38091	2.3037	1
1	2	-0.2	3	1	0.3	2	2.99063	2.20353	1
1	2	-0.2	3	1	0.4	2	2.58825	2.10337	1
1	2	-0.2	3	1	0.5	2	0.653717	1.4022	1
1	2	-0.2	3	2	0	2	6.86263	3.50567	1
1	2	-0.2	3	2	0.1	2	5.23174	3.10497	1
1	2	-0.2	3	2	0.2	2	4.75984	3.00481	1
1	2	-0.2	3	2	0.3	2	4.31134	2.50403	1
1	2	-0.2	3	2	0.4	2	3.90957	2.40384	1
1	2	-0.2	3	2	0.5	2	3.38091	2.3037	1
1	2	-0.2	3	3	0	2	8.81418	4.20679	1
1	2	-0.2	3	3	0.1	2	8.81418	4.10668	1
1	2	-0.2	3	3	0.2	2	6.86263	3.50567	1
1	2	-0.2	3	3	0.3	2	6.86263	3.4055	1
1	2	-0.2	3	3	0.4	2	4.75984	3.00481	1
1	2	-0.2	3	3	0.5	2	4.31134	2.50403	1
1	2	-0.1	1	1	0	2	3.90957	2.40384	1
1	2	-0.1	1	1	0.1	2	3.38091	2.3037	1
1	2	-0.1	1	1	0.2	2	2.99063	2.20353	1
1	2	-0.1	1	1	0.3	2	2.99063	2.20353	1
1	2	-0.1	1	1	0.4	2	2.58825	1.90306	1
1	2	-0.1	1	1	0.5	2	0.706171	1.30207	1
1	2	-0.1	1	2	0	2	6.86263	3.4055	1
1	2	-0.1	1	2	0.1	2	5.23174	2.70436	1
1	2	-0.1	1	2	0.2	2	4.75984	2.6042	1
1	2	-0.1	1	2	0.3	2	4.31134	2.50403	1
1	2	-0.1	1	2	0.4	2	3.90957	2.40384	1
1	2	-0.1	1	2	0.5	2	3.38091	2.3037	1
1	2	-0.1	1	3	0	2	8.81418	4.00653	1
1	2	-0.1	1	3	0.1	2	8.81418	4.00653	1
1	2	-0.1	1	3	0.2	2	6.86263	3.4055	1
1	2	-0.1	1	3	0.3	2	6.86263	3.4055	1
1	2	-0.1	1	3	0.4	2	5.23174	2.70436	1
1	2	-0.1	1	3	0.5	2	4.31134	2.50403	1
1	2	-0.1	2	1	0	2	3.90957	2.40384	1
1	2	-0.1	2	1	0.1	2	3.90957	2.40384	1
1	2	-0.1	2	1	0.2	2	3.38091	2.3037	1
1	2	-0.1	2	1	0.3	2	3.38091	2.3037	1
1	2	-0.1	2	1	0.4	2	2.99063	2.20353	1
1	2	-0.1	2	1	0.5	2	2.58825	1.90306	1
1	2	-0.1	2	2	0	2	6.86263	3.4055	1
1	2	-0.1	2	2	0.1	2	5.81441	3.20513	1
1	2	-0.1	2	2	0.2	2	5.23174	2.70436	1
1	2	-0.1	2	2	0.3	2	4.31134	2.50403	1
1	2	-0.1	2	2	0.4	2	3.90957	2.40384	1
1	2	-0.1	2	2	0.5	2	3.90957	2.40384	1
1	2	-0.1	2	3	0	2	8.81418	4.10668	1
1	2	-0.1	2	3	0.1	2	8.81418	4.00653	1
1	2	-0.1	2	3	0.2	2	8.44481	3.90628	1
1	2	-0.1	2	3	0.3	2	6.86263	3.4055	1
1	2	-0.1	2	3	0.4	2	5.23174	2.70436	1
1	2	-0.1	2	3	0.5	2	4.31134	2.50403	1
1	2	-0.1	3	1	0	2	4.31134	2.50403	1
1	2	-0.1	3	1	0.1	2	3.90957	2.40384	1
1	2	-0.1	3	1	0.2	2	3.90957	2.40384	1
1	2	-0.1	3	1	0.3	2	3.38091	2.3037	1
1	2	-0.1	3	1	0.4	2	3.38091	2.3037	1
1	2	-0.1	3	1	0.5	2	2.99063	2.20353	1
1	2	-0.1	3	2	0	2	8.44481	3.90628	1
1	2	-0.1	3	2	0.1	2	6.86263	3.4055	1
1	2	-0.1	3	2	0.2	2	5.23174	3.10497	1
1	2	-0.1	3	2	0.3	2	4.75984	2.6042	1
1	2	-0.1	3	2	0.4	2	4.31134	2.50403	1
1	2	-0.1	3	2	0.5	2	3.90957	2.40384	1
[truncated: 438 more rows]

## Sheet: Flight 2
FLIGHT Nr.	Encounter	Braking time shift [s]	Position sigma multiplier	Velocity sigma multiplier	THS	FF case (0) / EE case (1) / FE case (2)	Distance with the considered braking [m]	DNT (maxT) [s]	Safe (0), Danger (1)
2	1	-0.2	1	1	0	0	0	0	0
2	1	-0.2	1	1	0.1	0	0	0	0
2	1	-0.2	1	1	0.2	0	0	0	0
2	1	-0.2	1	1	0.3	0	0	0	0
2	1	-0.2	1	1	0.4	0	0	0	0
2	1	-0.2	1	1	0.5	0	0	0	0
2	1	-0.2	1	2	0	0	0	0	0
2	1	-0.2	1	2	0.1	0	0	0	0
2	1	-0.2	1	2	0.2	0	0	0	0
2	1	-0.2	1	2	0.3	0	0	0	0
2	1	-0.2	1	2	0.4	0	0	0	0
2	1	-0.2	1	2	0.5	0	0	0	0
2	1	-0.2	1	3	0	0	3.86969	1.09988	1
2	1	-0.2	1	3	0.1	0	3.86969	1.09988	1
2	1	-0.2	1	3	0.2	0	-0.801581	0.99986	1
2	1	-0.2	1	3	0.3	0	0	0	0
2	1	-0.2	1	3	0.4	0	0	0	0
2	1	-0.2	1	3	0.5	0	0	0	0
2	1	-0.2	2	1	0	0	0	0	0
2	1	-0.2	2	1	0.1	0	0	0	0
2	1	-0.2	2	1	0.2	0	0	0	0
2	1	-0.2	2	1	0.3	0	0	0	0
2	1	-0.2	2	1	0.4	0	0	0	0
2	1	-0.2	2	1	0.5	0	0	0	0
2	1	-0.2	2	2	0	0	-0.801581	0.99986	1
2	1	-0.2	2	2	0.1	0	0	0	0
2	1	-0.2	2	2	0.2	0	0	0	0
2	1	-0.2	2	2	0.3	0	0	0	0
2	1	-0.2	2	2	0.4	0	0	0	0
2	1	-0.2	2	2	0.5	0	0	0	0
2	1	-0.2	2	3	0	0	3.86969	1.19986	1
2	1	-0.2	2	3	0.1	0	3.86969	1.09988	1
2	1	-0.2	2	3	0.2	0	-0.801581	0.99986	1
2	1	-0.2	2	3	0.3	0	0	0	0
2	1	-0.2	2	3	0.4	0	0	0	0
2	1	-0.2	2	3	0.5	0	0	0	0
2	1	-0.2	3	1	0	0	0	0	0
2	1	-0.2	3	1	0.1	0	0	0	0
2	1	-0.2	3	1	0.2	0	0	0	0
2	1	-0.2	3	1	0.3	0	0	0	0
2	1	-0.2	3	1	0.4	0	0	0	0
2	1	-0.2	3	1	0.5	0	0	0	0
2	1	-0.2	3	2	0	0	-0.801581	0.99986	1
2	1	-0.2	3	2	0.1	0	-0.801581	0.99986	1
2	1	-0.2	3	2	0.2	0	0	0	0
2	1	-0.2	3	2	0.3	0	0	0	0
2	1	-0.2	3	2	0.4	0	0	0	0
2	1	-0.2	3	2	0.5	0	0	0	0
2	1	-0.2	3	3	0	0	3.86969	1.19986	1
2	1	-0.2	3	3	0.1	0	3.86969	1.09988	1
2	1	-0.2	3	3	0.2	0	3.86969	1.09988	1
2	1	-0.2	3	3	0.3	0	-0.801581	0.99986	1
2	1	-0.2	3	3	0.4	0	0	0	0
2	1	-0.2	3	3	0.5	0	0	0	0
2	1	-0.1	1	1	0	0	0	0	0
2	1	-0.1	1	1	0.1	0	0	0	0
2	1	-0.1	1	1	0.2	0	0	0	0
2	1	-0.1	1	1	0.3	0	0	0	0
2	1	-0.1	1	1	0.4	0	0	0	0
2	1	-0.1	1	1	0.5	0	0	0	0
2	1	-0.1	1	2	0	0	-0.801581	0.99986	1
2	1	-0.1	1	2	0.1	0	0	0	0
2	1	-0.1	1	2	0.2	0	0	0	0
2	1	-0.1	1	2	0.3	0	0	0	0
2	1	-0.1	1	2	0.4	0	0	0	0
2	1	-0.1	1	2	0.5	0	0	0	0
2	1	-0.1	1	3	0	0	3.86969	1.19986	1
2	1	-0.1	1	3	0.1	0	3.86969	1.19986	1
2	1	-0.1	1	3	0.2	0	3.86969	1.09988	1
2	1	-0.1	1	3	0.3	0	-0.801581	0.99986	1
2	1	-0.1	1	3	0.4	0	0	0	0
2	1	-0.1	1	3	0.5	0	0	0	0
2	1	-0.1	2	1	0	0	0	0	0
2	1	-0.1	2	1	0.1	0	0	0	0
2	1	-0.1	2	1	0.2	0	0	0	0
2	1	-0.1	2	1	0.3	0	0	0	0
2	1	-0.1	2	1	0.4	0	0	0	0
2	1	-0.1	2	1	0.5	0	0	0	0
2	1	-0.1	2	2	0	0	3.86969	1.09988	1
2	1	-0.1	2	2	0.1	0	-0.801581	0.99986	1
2	1	-0.1	2	2	0.2	0	0	0	0
2	1	-0.1	2	2	0.3	0	0	0	0
2	1	-0.1	2	2	0.4	0	0	0	0
2	1	-0.1	2	2	0.5	0	0	0	0
2	1	-0.1	2	3	0	0	3.86969	1.19986	1
2	1	-0.1	2	3	0.1	0	3.86969	1.19986	1
2	1	-0.1	2	3	0.2	0	3.86969	1.09988	1
2	1	-0.1	2	3	0.3	0	3.86969	1.09988	1
2	1	-0.1	2	3	0.4	0	0	0	0
2	1	-0.1	2	3	0.5	0	0	0	0
2	1	-0.1	3	1	0	0	0	0	0
2	1	-0.1	3	1	0.1	0	0	0	0
2	1	-0.1	3	1	0.2	0	0	0	0
2	1	-0.1	3	1	0.3	0	0	0	0
2	1	-0.1	3	1	0.4	0	0	0	0
2	1	-0.1	3	1	0.5	0	0	0	0
2	1	-0.1	3	2	0	0	3.86969	1.09988	1
2	1	-0.1	3	2	0.1	0	3.86969	0.9999	1
2	1	-0.1	3	2	0.2	0	-0.801581	0.99986	1
2	1	-0.1	3	2	0.3	0	0	0	0
2	1	-0.1	3	2	0.4	0	0	0	0
2	1	-0.1	3	2	0.5	0	0	0	0
2	1	-0.1	3	3	0	0	3.86969	1.29985	1
2	1	-0.1	3	3	0.1	0	3.86969	1.19986	1
2	1	-0.1	3	3	0.2	0	3.86969	1.09988	1
2	1	-0.1	3	3	0.3	0	3.86969	1.09988	1
2	1	-0.1	3	3	0.4	0	-0.801581	0.99986	1
2	1	-0.1	3	3	0.5	0	0	0	0
2	1	0	1	1	0	0	0	0	0
2	1	0	1	1	0.1	0	0	0	0
2	1	0	1	1	0.2	0	0	0	0
2	1	0	1	1	0.3	0	0	0	0
2	1	0	1	1	0.4	0	0	0	0
2	1	0	1	1	0.5	0	0	0	0
2	1	0	1	2	0	0	3.86969	1.09988	1
2	1	0	1	2	0.1	0	3.86969	1.09988	1
2	1	0	1	2	0.2	0	0	0	0
2	1	0	1	2	0.3	0	0	0	0
2	1	0	1	2	0.4	0	0	0	0
2	1	0	1	2	0.5	0	0	0	0
2	1	0	1	3	0	0	3.86969	1.29985	1
2	1	0	1	3	0.1	0	3.86969	1.19986	1
2	1	0	1	3	0.2	0	3.86969	1.19986	1
2	1	0	1	3	0.3	0	3.86969	1.09988	1
2	1	0	1	3	0.4	0	3.86969	1.09988	1
2	1	0	1	3	0.5	0	0	0	0
2	1	0	2	1	0	0	0	0	0
2	1	0	2	1	0.1	0	0	0	0
2	1	0	2	1	0.2	0	0	0	0
2	1	0	2	1	0.3	0	0	0	0
2	1	0	2	1	0.4	0	0	0	0
2	1	0	2	1	0.5	0	0	0	0
2	1	0	2	2	0	0	3.86969	1.09988	1
2	1	0	2	2	0.1	0	3.86969	1.09988	1
2	1	0	2	2	0.2	0	3.86969	0.9999	1
2	1	0	2	2	0.3	0	0	0	0
2	1	0	2	2	0.4	0	0	0	0
2	1	0	2	2	0.5	0	0	0	0
2	1	0	2	3	0	0	3.86969	1.29985	1
2	1	0	2	3	0.1	0	3.86969	1.19986	1
2	1	0	2	3	0.2	0	3.86969	1.19986	1
2	1	0	2	3	0.3	0	3.86969	1.09988	1
2	1	0	2	3	0.4	0	3.86969	1.09988	1
2	1	0	2	3	0.5	0	0	0	0
2	1	0	3	1	0	0	0	0	0
2	1	0	3	1	0.1	0	0	0	0
2	1	0	3	1	0.2	0	0	0	0
2	1	0	3	1	0.3	0	0	0	0
2	1	0	3	1	0.4	0	0	0	0
2	1	0	3	1	0.5	0	0	0	0
2	1	0	3	2	0	0	3.86969	1.19986	1
2	1	0	3	2	0.1	0	3.86969	1.09988	1
2	1	0	3	2	0.2	0	3.86969	1.09988	1
2	1	0	3	2	0.3	0	-0.801581	0.99986	1
2	1	0	3	2	0.4	0	0	0	0
2	1	0	3	2	0.5	0	0	0	0
2	1	0	3	3	0	0	3.86969	1.29985	1
2	1	0	3	3	0.1	0	3.86969	1.29985	1
2	1	0	3	3	0.2	0	3.86969	1.19986	1
2	1	0	3	3	0.3	0	3.86969	1.09988	1
2	1	0	3	3	0.4	0	3.86969	1.09988	1
2	1	0	3	3	0.5	0	-0.801581	0.99986	1
2	1	0.1	1	1	0	0	0	0	0
2	1	0.1	1	1	0.1	0	0	0	0
2	1	0.1	1	1	0.2	0	0	0	0
2	1	0.1	1	1	0.3	0	0	0	0
2	1	0.1	1	1	0.4	0	0	0	0
2	1	0.1	1	1	0.5	0	0	0	0
2	1	0.1	1	2	0	0	3.86969	1.19986	1
2	1	0.1	1	2	0.1	0	3.86969	1.09988	1
2	1	0.1	1	2	0.2	0	3.86969	1.09988	1
2	1	0.1	1	2	0.3	0	3.86969	0.9999	1
2	1	0.1	1	2	0.4	0	0	0	0
2	1	0.1	1	2	0.5	0	0	0	0
2	1	0.1	1	3	0	0	3.86969	1.29985	1
2	1	0.1	1	3	0.1	0	3.86969	1.29985	1
2	1	0.1	1	3	0.2	0	3.86969	1.19986	1
2	1	0.1	1	3	0.3	0	3.86969	1.19986	1
2	1	0.1	1	3	0.4	0	3.86969	1.09988	1
2	1	0.1	1	3	0.5	0	3.86969	1.09988	1
2	1	0.1	2	1	0	0	0	0	0
2	1	0.1	2	1	0.1	0	0	0	0
2	1	0.1	2	1	0.2	0	0	0	0
2	1	0.1	2	1	0.3	0	0	0	0
2	1	0.1	2	1	0.4	0	0	0	0
2	1	0.1	2	1	0.5	0	0	0	0
2	1	0.1	2	2	0	0	3.86969	1.19986	1
2	1	0.1	2	2	0.1	0	3.86969	1.09988	1
2	1	0.1	2	2	0.2	0	3.86969	1.09988	1
2	1	0.1	2	2	0.3	0	3.86969	1.09988	1
2	1	0.1	2	2	0.4	0	0	0	0
2	1	0.1	2	2	0.5	0	0	0	0
2	1	0.1	2	3	0	0	3.86969	1.29985	1
2	1	0.1	2	3	0.1	0	3.86969	1.29985	1
2	1	0.1	2	3	0.2	0	3.86969	1.19986	1
2	1	0.1	2	3	0.3	0	3.86969	1.19986	1
2	1	0.1	2	3	0.4	0	3.86969	1.09988	1
2	1	0.1	2	3	0.5	0	3.86969	1.09988	1
2	1	0.1	3	1	0	0	3.86969	0.9999	1
2	1	0.1	3	1	0.1	0	-0.801581	0.99986	1
2	1	0.1	3	1	0.2	0	0	0	0
2	1	0.1	3	1	0.3	0	0	0	0
2	1	0.1	3	1	0.4	0	0	0	0
2	1	0.1	3	1	0.5	0	0	0	0
2	1	0.1	3	2	0	0	3.86969	1.19986	1
2	1	0.1	3	2	0.1	0	3.86969	1.19986	1
2	1	0.1	3	2	0.2	0	3.86969	1.09988	1
2	1	0.1	3	2	0.3	0	3.86969	1.09988	1
2	1	0.1	3	2	0.4	0	3.86969	0.9999	1
2	1	0.1	3	2	0.5	0	0	0	0
2	1	0.1	3	3	0	0	3.86969	1.39984	1
2	1	0.1	3	3	0.1	0	3.86969	1.29985	1
2	1	0.1	3	3	0.2	0	3.86969	1.19986	1
2	1	0.1	3	3	0.3	0	3.86969	1.19986	1
2	1	0.1	3	3	0.4	0	3.86969	1.09988	1
2	1	0.1	3	3	0.5	0	3.86969	1.09988	1
2	1	0.2	1	1	0	0	3.86969	0.9999	1
2	1	0.2	1	1	0.1	0	0	0	0
2	1	0.2	1	1	0.2	0	0	0	0
2	1	0.2	1	1	0.3	0	0	0	0
2	1	0.2	1	1	0.4	0	0	0	0
2	1	0.2	1	1	0.5	0	0	0	0
2	1	0.2	1	2	0	0	3.86969	1.19986	1
2	1	0.2	1	2	0.1	0	3.86969	1.19986	1
2	1	0.2	1	2	0.2	0	3.86969	1.09988	1
2	1	0.2	1	2	0.3	0	3.86969	1.09988	1
2	1	0.2	1	2	0.4	0	3.86969	1.09988	1
2	1	0.2	1	2	0.5	0	0	0	0
2	1	0.2	1	3	0	0	3.86969	1.39984	1
2	1	0.2	1	3	0.1	0	3.86969	1.29985	1
2	1	0.2	1	3	0.2	0	3.86969	1.19986	1
2	1	0.2	1	3	0.3	0	3.86969	1.19986	1
2	1	0.2	1	3	0.4	0	3.86969	1.19986	1
2	1	0.2	1	3	0.5	0	3.86969	1.09988	1
2	1	0.2	2	1	0	0	3.86969	1.09988	1
2	1	0.2	2	1	0.1	0	3.86969	0.9999	1
2	1	0.2	2	1	0.2	0	0	0	0
2	1	0.2	2	1	0.3	0	0	0	0
2	1	0.2	2	1	0.4	0	0	0	0
2	1	0.2	2	1	0.5	0	0	0	0
2	1	0.2	2	2	0	0	3.86969	1.19986	1
2	1	0.2	2	2	0.1	0	3.86969	1.19986	1
2	1	0.2	2	2	0.2	0	3.86969	1.09988	1
2	1	0.2	2	2	0.3	0	3.86969	1.09988	1
2	1	0.2	2	2	0.4	0	3.86969	1.09988	1
2	1	0.2	2	2	0.5	0	3.86969	0.9999	1
2	1	0.2	2	3	0	0	3.86969	1.39984	1
2	1	0.2	2	3	0.1	0	3.86969	1.29985	1
2	1	0.2	2	3	0.2	0	3.86969	1.29985	1
2	1	0.2	2	3	0.3	0	3.86969	1.19986	1
2	1	0.2	2	3	0.4	0	3.86969	1.19986	1
2	1	0.2	2	3	0.5	0	3.86969	1.09988	1
2	1	0.2	3	1	0	0	3.86969	1.09988	1
2	1	0.2	3	1	0.1	0	3.86969	1.09988	1
2	1	0.2	3	1	0.2	0	3.86969	0.9999	1
2	1	0.2	3	1	0.3	0	0	0	0
2	1	0.2	3	1	0.4	0	0	0	0
2	1	0.2	3	1	0.5	0	0	0	0
2	1	0.2	3	2	0	0	3.86969	1.19986	1
2	1	0.2	3	2	0.1	0	3.86969	1.19986	1
2	1	0.2	3	2	0.2	0	3.86969	1.19986	1
2	1	0.2	3	2	0.3	0	3.86969	1.09988	1
2	1	0.2	3	2	0.4	0	3.86969	1.09988	1
2	1	0.2	3	2	0.5	0	3.86969	0.9999	1
2	1	0.2	3	3	0	0	3.86969	1.39984	1
2	1	0.2	3	3	0.1	0	3.86969	1.29985	1
2	1	0.2	3	3	0.2	0	3.86969	1.29985	1
2	1	0.2	3	3	0.3	0	3.86969	1.19986	1
2	1	0.2	3	3	0.4	0	3.86969	1.19986	1
2	1	0.2	3	3	0.5	0	3.86969	1.09988	1
2	1	-0.2	1	1	0	1	0	0	0
2	1	-0.2	1	1	0.1	1	0	0	0
2	1	-0.2	1	1	0.2	1	0	0	0
2	1	-0.2	1	1	0.3	1	0	0	0
2	1	-0.2	1	1	0.4	1	0	0	0
2	1	-0.2	1	1	0.5	1	0	0	0
2	1	-0.2	1	2	0	1	0	0	0
2	1	-0.2	1	2	0.1	1	0	0	0
2	1	-0.2	1	2	0.2	1	0	0	0
2	1	-0.2	1	2	0.3	1	0	0	0
2	1	-0.2	1	2	0.4	1	0	0	0
2	1	-0.2	1	2	0.5	1	0	0	0
2	1	-0.2	1	3	0	1	0	0	0
2	1	-0.2	1	3	0.1	1	0	0	0
2	1	-0.2	1	3	0.2	1	0	0	0
2	1	-0.2	1	3	0.3	1	0	0	0
2	1	-0.2	1	3	0.4	1	0	0	0
2	1	-0.2	1	3	0.5	1	0	0	0
2	1	-0.2	2	1	0	1	0	0	0
2	1	-0.2	2	1	0.1	1	0	0	0
2	1	-0.2	2	1	0.2	1	0	0	0
2	1	-0.2	2	1	0.3	1	0	0	0
2	1	-0.2	2	1	0.4	1	0	0	0
2	1	-0.2	2	1	0.5	1	0	0	0
2	1	-0.2	2	2	0	1	0	0	0
2	1	-0.2	2	2	0.1	1	0	0	0
2	1	-0.2	2	2	0.2	1	0	0	0
2	1	-0.2	2	2	0.3	1	0	0	0
2	1	-0.2	2	2	0.4	1	0	0	0
2	1	-0.2	2	2	0.5	1	0	0	0
2	1	-0.2	2	3	0	1	0	0	0
2	1	-0.2	2	3	0.1	1	0	0	0
2	1	-0.2	2	3	0.2	1	0	0	0
2	1	-0.2	2	3	0.3	1	0	0	0
2	1	-0.2	2	3	0.4	1	0	0	0
2	1	-0.2	2	3	0.5	1	0	0	0
2	1	-0.2	3	1	0	1	0	0	0
2	1	-0.2	3	1	0.1	1	0	0	0
2	1	-0.2	3	1	0.2	1	0	0	0
2	1	-0.2	3	1	0.3	1	0	0	0
2	1	-0.2	3	1	0.4	1	0	0	0
2	1	-0.2	3	1	0.5	1	0	0	0
2	1	-0.2	3	2	0	1	0	0	0
2	1	-0.2	3	2	0.1	1	0	0	0
2	1	-0.2	3	2	0.2	1	0	0	0
2	1	-0.2	3	2	0.3	1	0	0	0
2	1	-0.2	3	2	0.4	1	0	0	0
2	1	-0.2	3	2	0.5	1	0	0	0
2	1	-0.2	3	3	0	1	0	0	0
2	1	-0.2	3	3	0.1	1	0	0	0
2	1	-0.2	3	3	0.2	1	0	0	0
2	1	-0.2	3	3	0.3	1	0	0	0
2	1	-0.2	3	3	0.4	1	0	0	0
2	1	-0.2	3	3	0.5	1	0	0	0
2	1	-0.1	1	1	0	1	0	0	0
2	1	-0.1	1	1	0.1	1	0	0	0
2	1	-0.1	1	1	0.2	1	0	0	0
2	1	-0.1	1	1	0.3	1	0	0	0
2	1	-0.1	1	1	0.4	1	0	0	0
2	1	-0.1	1	1	0.5	1	0	0	0
2	1	-0.1	1	2	0	1	0	0	0
2	1	-0.1	1	2	0.1	1	0	0	0
2	1	-0.1	1	2	0.2	1	0	0	0
2	1	-0.1	1	2	0.3	1	0	0	0
2	1	-0.1	1	2	0.4	1	0	0	0
2	1	-0.1	1	2	0.5	1	0	0	0
2	1	-0.1	1	3	0	1	0	0	0
2	1	-0.1	1	3	0.1	1	0	0	0
2	1	-0.1	1	3	0.2	1	0	0	0
2	1	-0.1	1	3	0.3	1	0	0	0
2	1	-0.1	1	3	0.4	1	0	0	0
2	1	-0.1	1	3	0.5	1	0	0	0
2	1	-0.1	2	1	0	1	0	0	0
2	1	-0.1	2	1	0.1	1	0	0	0
2	1	-0.1	2	1	0.2	1	0	0	0
2	1	-0.1	2	1	0.3	1	0	0	0
2	1	-0.1	2	1	0.4	1	0	0	0
2	1	-0.1	2	1	0.5	1	0	0	0
2	1	-0.1	2	2	0	1	0	0	0
2	1	-0.1	2	2	0.1	1	0	0	0
2	1	-0.1	2	2	0.2	1	0	0	0
2	1	-0.1	2	2	0.3	1	0	0	0
2	1	-0.1	2	2	0.4	1	0	0	0
2	1	-0.1	2	2	0.5	1	0	0	0
2	1	-0.1	2	3	0	1	0	0	0
2	1	-0.1	2	3	0.1	1	0	0	0
2	1	-0.1	2	3	0.2	1	0	0	0
2	1	-0.1	2	3	0.3	1	0	0	0
2	1	-0.1	2	3	0.4	1	0	0	0
2	1	-0.1	2	3	0.5	1	0	0	0
2	1	-0.1	3	1	0	1	0	0	0
2	1	-0.1	3	1	0.1	1	0	0	0
2	1	-0.1	3	1	0.2	1	0	0	0
2	1	-0.1	3	1	0.3	1	0	0	0
2	1	-0.1	3	1	0.4	1	0	0	0
2	1	-0.1	3	1	0.5	1	0	0	0
2	1	-0.1	3	2	0	1	0	0	0
2	1	-0.1	3	2	0.1	1	0	0	0
2	1	-0.1	3	2	0.2	1	0	0	0
2	1	-0.1	3	2	0.3	1	0	0	0
2	1	-0.1	3	2	0.4	1	0	0	0
2	1	-0.1	3	2	0.5	1	0	0	0
2	1	-0.1	3	3	0	1	0	0	0
2	1	-0.1	3	3	0.1	1	0	0	0
2	1	-0.1	3	3	0.2	1	0	0	0
2	1	-0.1	3	3	0.3	1	0	0	0
2	1	-0.1	3	3	0.4	1	0	0	0
2	1	-0.1	3	3	0.5	1	0	0	0
2	1	0	1	1	0	1	0	0	0
2	1	0	1	1	0.1	1	0	0	0
2	1	0	1	1	0.2	1	0	0	0
2	1	0	1	1	0.3	1	0	0	0
2	1	0	1	1	0.4	1	0	0	0
2	1	0	1	1	0.5	1	0	0	0
2	1	0	1	2	0	1	0	0	0
2	1	0	1	2	0.1	1	0	0	0
2	1	0	1	2	0.2	1	0	0	0
2	1	0	1	2	0.3	1	0	0	0
2	1	0	1	2	0.4	1	0	0	0
2	1	0	1	2	0.5	1	0	0	0
2	1	0	1	3	0	1	0	0	0
2	1	0	1	3	0.1	1	0	0	0
2	1	0	1	3	0.2	1	0	0	0
2	1	0	1	3	0.3	1	0	0	0
2	1	0	1	3	0.4	1	0	0	0
2	1	0	1	3	0.5	1	0	0	0
2	1	0	2	1	0	1	0	0	0
2	1	0	2	1	0.1	1	0	0	0
2	1	0	2	1	0.2	1	0	0	0
2	1	0	2	1	0.3	1	0	0	0
2	1	0	2	1	0.4	1	0	0	0
2	1	0	2	1	0.5	1	0	0	0
2	1	0	2	2	0	1	0	0	0
2	1	0	2	2	0.1	1	0	0	0
2	1	0	2	2	0.2	1	0	0	0
2	1	0	2	2	0.3	1	0	0	0
2	1	0	2	2	0.4	1	0	0	0
2	1	0	2	2	0.5	1	0	0	0
2	1	0	2	3	0	1	0	0	0
2	1	0	2	3	0.1	1	0	0	0
2	1	0	2	3	0.2	1	0	0	0
2	1	0	2	3	0.3	1	0	0	0
2	1	0	2	3	0.4	1	0	0	0
2	1	0	2	3	0.5	1	0	0	0
2	1	0	3	1	0	1	0	0	0
2	1	0	3	1	0.1	1	0	0	0
2	1	0	3	1	0.2	1	0	0	0
2	1	0	3	1	0.3	1	0	0	0
2	1	0	3	1	0.4	1	0	0	0
2	1	0	3	1	0.5	1	0	0	0
2	1	0	3	2	0	1	0	0	0
2	1	0	3	2	0.1	1	0	0	0
2	1	0	3	2	0.2	1	0	0	0
2	1	0	3	2	0.3	1	0	0	0
2	1	0	3	2	0.4	1	0	0	0
2	1	0	3	2	0.5	1	0	0	0
2	1	0	3	3	0	1	0	0	0
2	1	0	3	3	0.1	1	0	0	0
2	1	0	3	3	0.2	1	0	0	0
2	1	0	3	3	0.3	1	0	0	0
2	1	0	3	3	0.4	1	0	0	0
2	1	0	3	3	0.5	1	0	0	0
2	1	0.1	1	1	0	1	0	0	0
2	1	0.1	1	1	0.1	1	0	0	0
2	1	0.1	1	1	0.2	1	0	0	0
2	1	0.1	1	1	0.3	1	0	0	0
2	1	0.1	1	1	0.4	1	0	0	0
2	1	0.1	1	1	0.5	1	0	0	0
2	1	0.1	1	2	0	1	0	0	0
2	1	0.1	1	2	0.1	1	0	0	0
2	1	0.1	1	2	0.2	1	0	0	0
2	1	0.1	1	2	0.3	1	0	0	0
2	1	0.1	1	2	0.4	1	0	0	0
2	1	0.1	1	2	0.5	1	0	0	0
2	1	0.1	1	3	0	1	0	0	0
2	1	0.1	1	3	0.1	1	0	0	0
2	1	0.1	1	3	0.2	1	0	0	0
2	1	0.1	1	3	0.3	1	0	0	0
2	1	0.1	1	3	0.4	1	0	0	0
2	1	0.1	1	3	0.5	1	0	0	0
2	1	0.1	2	1	0	1	0	0	0
2	1	0.1	2	1	0.1	1	0	0	0
2	1	0.1	2	1	0.2	1	0	0	0
2	1	0.1	2	1	0.3	1	0	0	0
2	1	0.1	2	1	0.4	1	0	0	0
2	1	0.1	2	1	0.5	1	0	0	0
2	1	0.1	2	2	0	1	0	0	0
2	1	0.1	2	2	0.1	1	0	0	0
2	1	0.1	2	2	0.2	1	0	0	0
2	1	0.1	2	2	0.3	1	0	0	0
2	1	0.1	2	2	0.4	1	0	0	0
2	1	0.1	2	2	0.5	1	0	0	0
2	1	0.1	2	3	0	1	0	0	0
2	1	0.1	2	3	0.1	1	0	0	0
2	1	0.1	2	3	0.2	1	0	0	0
2	1	0.1	2	3	0.3	1	0	0	0
2	1	0.1	2	3	0.4	1	0	0	0
2	1	0.1	2	3	0.5	1	0	0	0
2	1	0.1	3	1	0	1	0	0	0
2	1	0.1	3	1	0.1	1	0	0	0
2	1	0.1	3	1	0.2	1	0	0	0
2	1	0.1	3	1	0.3	1	0	0	0
2	1	0.1	3	1	0.4	1	0	0	0
2	1	0.1	3	1	0.5	1	0	0	0
2	1	0.1	3	2	0	1	0	0	0
2	1	0.1	3	2	0.1	1	0	0	0
2	1	0.1	3	2	0.2	1	0	0	0
2	1	0.1	3	2	0.3	1	0	0	0
2	1	0.1	3	2	0.4	1	0	0	0
2	1	0.1	3	2	0.5	1	0	0	0
2	1	0.1	3	3	0	1	0.549793	0.99986	1
2	1	0.1	3	3	0.1	1	0	0	0
2	1	0.1	3	3	0.2	1	0	0	0
2	1	0.1	3	3	0.3	1	0	0	0
2	1	0.1	3	3	0.4	1	0	0	0
2	1	0.1	3	3	0.5	1	0	0	0
2	1	0.2	1	1	0	1	0	0	0
2	1	0.2	1	1	0.1	1	0	0	0
2	1	0.2	1	1	0.2	1	0	0	0
2	1	0.2	1	1	0.3	1	0	0	0
2	1	0.2	1	1	0.4	1	0	0	0
2	1	0.2	1	1	0.5	1	0	0	0
2	1	0.2	1	2	0	1	0	0	0
2	1	0.2	1	2	0.1	1	0	0	0
2	1	0.2	1	2	0.2	1	0	0	0
2	1	0.2	1	2	0.3	1	0	0	0
2	1	0.2	1	2	0.4	1	0	0	0
2	1	0.2	1	2	0.5	1	0	0	0
2	1	0.2	1	3	0	1	0.549793	0.99986	1
2	1	0.2	1	3	0.1	1	0	0	0
2	1	0.2	1	3	0.2	1	0	0	0
2	1	0.2	1	3	0.3	1	0	0	0
2	1	0.2	1	3	0.4	1	0	0	0
2	1	0.2	1	3	0.5	1	0	0	0
2	1	0.2	2	1	0	1	0	0	0
2	1	0.2	2	1	0.1	1	0	0	0
2	1	0.2	2	1	0.2	1	0	0	0
2	1	0.2	2	1	0.3	1	0	0	0
2	1	0.2	2	1	0.4	1	0	0	0
2	1	0.2	2	1	0.5	1	0	0	0
2	1	0.2	2	2	0	1	0	0	0
2	1	0.2	2	2	0.1	1	0	0	0
2	1	0.2	2	2	0.2	1	0	0	0
2	1	0.2	2	2	0.3	1	0	0	0
2	1	0.2	2	2	0.4	1	0	0	0
2	1	0.2	2	2	0.5	1	0	0	0
2	1	0.2	2	3	0	1	0.549793	1.19985	1
2	1	0.2	2	3	0.1	1	0.549793	0.99986	1
2	1	0.2	2	3	0.2	1	0	0	0
2	1	0.2	2	3	0.3	1	0	0	0
2	1	0.2	2	3	0.4	1	0	0	0
2	1	0.2	2	3	0.5	1	0	0	0
2	1	0.2	3	1	0	1	0	0	0
2	1	0.2	3	1	0.1	1	0	0	0
2	1	0.2	3	1	0.2	1	0	0	0
2	1	0.2	3	1	0.3	1	0	0	0
2	1	0.2	3	1	0.4	1	0	0	0
2	1	0.2	3	1	0.5	1	0	0	0
2	1	0.2	3	2	0	1	0	0	0
2	1	0.2	3	2	0.1	1	0	0	0
2	1	0.2	3	2	0.2	1	0	0	0
2	1	0.2	3	2	0.3	1	0	0	0
2	1	0.2	3	2	0.4	1	0	0	0
2	1	0.2	3	2	0.5	1	0	0	0
2	1	0.2	3	3	0	1	1.75306	1.99976	1
2	1	0.2	3	3	0.1	1	0.549793	0.99986	1
2	1	0.2	3	3	0.2	1	0	0	0
2	1	0.2	3	3	0.3	1	0	0	0
2	1	0.2	3	3	0.4	1	0	0	0
2	1	0.2	3	3	0.5	1	0	0	0
2	2	-0.2	1	1	0	0	-5.26165	1.79978	1
2	2	-0.2	1	1	0.1	0	-4.89114	1.69983	1
2	2	-0.2	1	1	0.2	0	0	0	0
2	2	-0.2	1	1	0.3	0	0	0	0
2	2	-0.2	1	1	0.4	0	0	0	0
2	2	-0.2	1	1	0.5	0	0	0	0
2	2	-0.2	1	2	0	0	-3.57006	2.49972	1
2	2	-0.2	1	2	0.1	0	-3.57006	2.49972	1
2	2	-0.2	1	2	0.2	0	-3.85945	2.29979	1
2	2	-0.2	1	2	0.3	0	-3.85945	2.29979	1
2	2	-0.2	1	2	0.4	0	-5.26165	1.79978	1
2	2	-0.2	1	2	0.5	0	-4.89114	1.69983	1
2	2	-0.2	1	3	0	0	-2.73485	3.40052	1
2	2	-0.2	1	3	0.1	0	-3.20037	3.19965	1
2	2	-0.2	1	3	0.2	0	-3.57006	2.69975	1
2	2	-0.2	1	3	0.3	0	-3.57006	2.49972	1
2	2	-0.2	1	3	0.4	0	-3.85945	2.29979	1
2	2	-0.2	1	3	0.5	0	-3.85945	2.29979	1
2	2	-0.2	2	1	0	0	-5.26165	1.99979	1
2	2	-0.2	2	1	0.1	0	-5.26165	1.79978	1
2	2	-0.2	2	1	0.2	0	-4.89114	1.69983	1
2	2	-0.2	2	1	0.3	0	-4.89114	1.69983	1
2	2	-0.2	2	1	0.4	0	0	0	0
2	2	-0.2	2	1	0.5	0	0	0	0
2	2	-0.2	2	2	0	0	-3.57006	2.69975	1
2	2	-0.2	2	2	0.1	0	-3.57006	2.49972	1
2	2	-0.2	2	2	0.2	0	-3.85945	2.39974	1
2	2	-0.2	2	2	0.3	0	-3.85945	2.29979	1
2	2	-0.2	2	2	0.4	0	-5.26165	1.99979	1
2	2	-0.2	2	2	0.5	0	-5.26165	1.79978	1
2	2	-0.2	2	3	0	0	-2.73485	3.59959	1
2	2	-0.2	2	3	0.1	0	-3.20037	3.30053	1
2	2	-0.2	2	3	0.2	0	-3.57006	2.89968	1
2	2	-0.2	2	3	0.3	0	-3.57006	2.69975	1
2	2	-0.2	2	3	0.4	0	-3.57006	2.49972	1
2	2	-0.2	2	3	0.5	0	-3.85945	2.29979	1
2	2	-0.2	3	1	0	0	-3.85945	2.29979	1
2	2	-0.2	3	1	0.1	0	-5.26165	1.99979	1
2	2	-0.2	3	1	0.2	0	-5.26165	1.79978	1
2	2	-0.2	3	1	0.3	0	-4.89114	1.69983	1
2	2	-0.2	3	1	0.4	0	0	0	0
2	2	-0.2	3	1	0.5	0	0	0	0
2	2	-0.2	3	2	0	0	-3.57006	2.89968	1
2	2	-0.2	3	2	0.1	0	-3.57006	2.69975	1
2	2	-0.2	3	2	0.2	0	-3.57006	2.49972	1
2	2	-0.2	3	2	0.3	0	-3.85945	2.29979	1
2	2	-0.2	3	2	0.4	0	-3.85945	2.29979	1
2	2	-0.2	3	2	0.5	0	-5.26165	1.79978	1
2	2	-0.2	3	3	0	0	-2.73485	3.69961	1
2	2	-0.2	3	3	0.1	0	-2.73485	3.59959	1
2	2	-0.2	3	3	0.2	0	-3.20037	3.19965	1
2	2	-0.2	3	3	0.3	0	-3.57006	2.7997	1
2	2	-0.2	3	3	0.4	0	-3.57006	2.49972	1
2	2	-0.2	3	3	0.5	0	-3.85945	2.29979	1
2	2	-0.1	1	1	0	0	-3.85945	2.29979	1
2	2	-0.1	1	1	0.1	0	-3.85945	2.19979	1
2	2	-0.1	1	1	0.2	0	-5.26165	1.79978	1
2	2	-0.1	1	1	0.3	0	-5.26165	1.79978	1
2	2	-0.1	1	1	0.4	0	-4.89114	1.19988	1
2	2	-0.1	1	1	0.5	0	0	0	0
2	2	-0.1	1	2	0	0	-3.57006	2.59969	1
2	2	-0.1	1	2	0.1	0	-3.57006	2.49972	1
2	2	-0.1	1	2	0.2	0	-3.57006	2.49972	1
2	2	-0.1	1	2	0.3	0	-3.85945	2.29979	1
2	2	-0.1	1	2	0.4	0	-3.85945	2.29979	1
2	2	-0.1	1	2	0.5	0	-3.85945	2.19979	1
2	2	-0.1	1	3	0	0	-2.73485	3.59959	1
2	2	-0.1	1	3	0.1	0	-2.73485	3.29964	1
2	2	-0.1	1	3	0.2	0	-3.20037	2.99966	1
2	2	-0.1	1	3	0.3	0	-3.57006	2.69975	1
2	2	-0.1	1	3	0.4	0	-3.57006	2.49972	1
2	2	-0.1	1	3	0.5	0	-3.85945	2.29979	1
2	2	-0.1	2	1	0	0	-3.85945	2.29979	1
2	2	-0.1	2	1	0.1	0	-3.85945	2.29979	1
2	2	-0.1	2	1	0.2	0	-3.85945	2.19979	1
2	2	-0.1	2	1	0.3	0	-5.26165	1.79978	1
2	2	-0.1	2	1	0.4	0	-4.89114	1.69983	1
2	2	-0.1	2	1	0.5	0	-4.89114	1.19988	1
2	2	-0.1	2	2	0	0	-3.57006	2.89968	1
2	2	-0.1	2	2	0.1	0	-3.57006	2.59969	1
2	2	-0.1	2	2	0.2	0	-3.57006	2.49972	1
2	2	-0.1	2	2	0.3	0	-3.57006	2.49972	1
2	2	-0.1	2	2	0.4	0	-3.85945	2.29979	1
2	2	-0.1	2	2	0.5	0	-3.85945	2.29979	1
2	2	-0.1	2	3	0	0	-2.26051	3.79958	1
2	2	-0.1	2	3	0.1	0	-2.73485	3.59959	1
2	2	-0.1	2	3	0.2	0	-3.20037	3.19965	1
2	2	-0.1	2	3	0.3	0	-3.57006	2.7997	1
2	2	-0.1	2	3	0.4	0	-3.57006	2.59969	1
2	2	-0.1	2	3	0.5	0	-3.57006	2.49972	1
2	2	-0.1	3	1	0	0	-3.85945	2.39974	1
2	2	-0.1	3	1	0.1	0	-3.85945	2.29979	1
2	2	-0.1	3	1	0.2	0	-3.85945	2.29979	1
2	2	-0.1	3	1	0.3	0	-5.26165	1.89979	1
2	2	-0.1	3	1	0.4	0	-5.26165	1.79978	1
2	2	-0.1	3	1	0.5	0	-4.89114	1.69983	1
2	2	-0.1	3	2	0	0	-3.20037	3.19965	1
2	2	-0.1	3	2	0.1	0	-3.57006	2.7997	1
2	2	-0.1	3	2	0.2	0	-3.57006	2.59969	1
2	2	-0.1	3	2	0.3	0	-3.57006	2.49972	1
2	2	-0.1	3	2	0.4	0	-3.85945	2.29979	1
2	2	-0.1	3	2	0.5	0	-3.85945	2.29979	1
2	2	-0.1	3	3	0	0	-1.54906	3.99953	1
2	2	-0.1	3	3	0.1	0	-2.73485	3.69961	1
2	2	-0.1	3	3	0.2	0	-2.73485	3.40052	1
2	2	-0.1	3	3	0.3	0	-3.20037	2.99966	1
2	2	-0.1	3	3	0.4	0	-3.57006	2.59969	1
2	2	-0.1	3	3	0.5	0	-3.57006	2.49972	1
2	2	0	1	1	0	0	-3.85945	2.29979	1
2	2	0	1	1	0.1	0	-3.85945	2.29979	1
2	2	0	1	1	0.2	0	-3.85945	2.19979	1
2	2	0	1	1	0.3	0	-3.85945	2.09978	1
2	2	0	1	1	0.4	0	-5.26165	1.79978	1
2	2	0	1	1	0.5	0	-5.26165	1.79978	1
2	2	0	1	2	0	0	-3.20037	2.79973	1
2	2	0	1	2	0.1	0	-3.57006	2.59969	1
2	2	0	1	2	0.2	0	-3.57006	2.49972	1
2	2	0	1	2	0.3	0	-3.57006	2.49972	1
2	2	0	1	2	0.4	0	-3.57006	2.39977	1
2	2	0	1	2	0.5	0	-3.85945	2.29979	1
2	2	0	1	3	0	0	-2.26051	3.79958	1
2	2	0	1	3	0.1	0	-2.73485	3.40052	1
2	2	0	1	3	0.2	0	-2.73485	3.29964	1
2	2	0	1	3	0.3	0	-3.20037	2.89968	1
2	2	0	1	3	0.4	0	-3.57006	2.59969	1
2	2	0	1	3	0.5	0	-3.57006	2.49972	1
2	2	0	2	1	0	0	-3.57006	2.39977	1
2	2	0	2	1	0.1	0	-3.85945	2.29979	1
2	2	0	2	1	0.2	0	-3.85945	2.29979	1
2	2	0	2	1	0.3	0	-3.85945	2.29979	1
2	2	0	2	1	0.4	0	-3.85945	2.19979	1
2	2	0	2	1	0.5	0	-5.26165	1.79978	1
2	2	0	2	2	0	0	-3.20037	2.99966	1
2	2	0	2	2	0.1	0	-3.57006	2.69975	1
2	2	0	2	2	0.2	0	-3.57006	2.59969	1
2	2	0	2	2	0.3	0	-3.57006	2.49972	1
2	2	0	2	2	0.4	0	-3.57006	2.49972	1
2	2	0	2	2	0.5	0	-3.85945	2.29979	1
2	2	0	2	3	0	0	-1.54906	3.89958	1
2	2	0	2	3	0.1	0	-2.73485	3.59959	1
2	2	0	2	3	0.2	0	-2.73485	3.29964	1
2	2	0	2	3	0.3	0	-3.20037	2.99966	1
2	2	0	2	3	0.4	0	-3.57006	2.59969	1
2	2	0	2	3	0.5	0	-3.57006	2.49972	1
2	2	0	3	1	0	0	-3.57006	2.49972	1
2	2	0	3	1	0.1	0	-3.57006	2.49972	1
2	2	0	3	1	0.2	0	-3.85945	2.29979	1
2	2	0	3	1	0.3	0	-3.85945	2.29979	1
2	2	0	3	1	0.4	0	-3.85945	2.29979	1
2	2	0	3	1	0.5	0	-3.85945	2.09978	1
2	2	0	3	2	0	0	-3.20037	3.19965	1
2	2	0	3	2	0.1	0	-3.20037	2.99966	1
2	2	0	3	2	0.2	0	-3.57006	2.69975	1
2	2	0	3	2	0.3	0	-3.57006	2.59969	1
2	2	0	3	2	0.4	0	-3.57006	2.49972	1
2	2	0	3	2	0.5	0	-3.85945	2.29979	1
2	2	0	3	3	0	0	-0.953191	4.09955	1
2	2	0	3	3	0.1	0	-2.26051	3.79958	1
2	2	0	3	3	0.2	0	-2.73485	3.4997	1
2	2	0	3	3	0.3	0	-3.20037	3.19965	1
2	2	0	3	3	0.4	0	-3.57006	2.69975	1
2	2	0	3	3	0.5	0	-3.57006	2.49972	1
2	2	0.1	1	1	0	0	-3.57006	2.39977	1
2	2	0.1	1	1	0.1	0	-3.57006	2.39977	1
2	2	0.1	1	1	0.2	0	-3.85945	2.29979	1
2	2	0.1	1	1	0.3	0	-3.85945	2.29979	1
2	2	0.1	1	1	0.4	0	-3.85945	2.19979	1
2	2	0.1	1	1	0.5	0	-3.85945	2.09978	1
2	2	0.1	1	2	0	0	-3.20037	2.89968	1
2	2	0.1	1	2	0.1	0	-3.20037	2.79973	1
2	2	0.1	1	2	0.2	0	-3.57006	2.59969	1
2	2	0.1	1	2	0.3	0	-3.57006	2.49972	1
2	2	0.1	1	2	0.4	0	-3.57006	2.49972	1
2	2	0.1	1	2	0.5	0	-3.57006	2.39977	1
2	2	0.1	1	3	0	0	-1.54906	3.89958	1
2	2	0.1	1	3	0.1	0	-2.26051	3.69956	1
2	2	0.1	1	3	0.2	0	-2.73485	3.29964	1
2	2	0.1	1	3	0.3	0	-3.20037	2.99966	1
2	2	0.1	1	3	0.4	0	-3.20037	2.79973	1
2	2	0.1	1	3	0.5	0	-3.57006	2.49972	1
2	2	0.1	2	1	0	0	-3.57006	2.49972	1
2	2	0.1	2	1	0.1	0	-3.57006	2.49972	1
2	2	0.1	2	1	0.2	0	-3.57006	2.39977	1
2	2	0.1	2	1	0.3	0	-3.85945	2.29979	1
2	2	0.1	2	1	0.4	0	-3.85945	2.29979	1
2	2	0.1	2	1	0.5	0	-3.85945	2.19979	1
2	2	0.1	2	2	0	0	-2.73485	3.09965	1
2	2	0.1	2	2	0.1	0	-3.20037	2.89968	1
2	2	0.1	2	2	0.2	0	-3.57006	2.69975	1
2	2	0.1	2	2	0.3	0	-3.57006	2.59969	1
2	2	0.1	2	2	0.4	0	-3.57006	2.49972	1
2	2	0.1	2	2	0.5	0	-3.57006	2.39977	1
2	2	0.1	2	3	0	0	-0.953191	3.9996	1
2	2	0.1	2	3	0.1	0	-1.54906	3.89958	1
2	2	0.1	2	3	0.2	0	-2.73485	3.40052	1
2	2	0.1	2	3	0.3	0	-2.73485	3.09965	1
2	2	0.1	2	3	0.4	0	-3.20037	2.79973	1
2	2	0.1	2	3	0.5	0	-3.57006	2.59969	1
2	2	0.1	3	1	0	0	-3.57006	2.49972	1
2	2	0.1	3	1	0.1	0	-3.57006	2.49972	1
2	2	0.1	3	1	0.2	0	-3.57006	2.49972	1
2	2	0.1	3	1	0.3	0	-3.85945	2.29979	1
2	2	0.1	3	1	0.4	0	-3.85945	2.29979	1
2	2	0.1	3	1	0.5	0	-3.85945	2.29979	1
2	2	0.1	3	2	0	0	-2.73485	3.40052	1
2	2	0.1	3	2	0.1	0	-3.20037	2.99966	1
2	2	0.1	3	2	0.2	0	-3.20037	2.89968	1
2	2	0.1	3	2	0.3	0	-3.57006	2.59969	1
2	2	0.1	3	2	0.4	0	-3.57006	2.49972	1
2	2	0.1	3	2	0.5	0	-3.57006	2.49972	1
2	2	0.1	3	3	0	0	-0.953191	4.09955	1
2	2	0.1	3	3	0.1	0	-1.54906	3.89958	1
2	2	0.1	3	3	0.2	0	-2.26051	3.69956	1
2	2	0.1	3	3	0.3	0	-2.73485	3.29964	1
2	2	0.1	3	3	0.4	0	-3.20037	2.89968	1
2	2	0.1	3	3	0.5	0	-3.57006	2.59969	1
2	2	0.2	1	1	0	0	-3.57006	2.49972	1
2	2	0.2	1	1	0.1	0	-3.57006	2.39977	1
2	2	0.2	1	1	0.2	0	-3.57006	2.39977	1
2	2	0.2	1	1	0.3	0	-3.57006	2.39977	1
2	2	0.2	1	1	0.4	0	-4.83301	2.0998	1
2	2	0.2	1	1	0.5	0	-4.83301	1.9998	1
2	2	0.2	1	2	0	0	-2.73485	3.09965	1
2	2	0.2	1	2	0.1	0	-3.20037	2.79973	1
2	2	0.2	1	2	0.2	0	-3.20037	2.69967	1
2	2	0.2	1	2	0.3	0	-3.57006	2.49972	1
2	2	0.2	1	2	0.4	0	-3.57006	2.49972	1
2	2	0.2	1	2	0.5	0	-3.57006	2.39977	1
2	2	0.2	1	3	0	0	-0.953191	3.9996	1
2	2	0.2	1	3	0.1	0	-1.54906	3.79956	1
2	2	0.2	1	3	0.2	0	-2.26051	3.39961	1
2	2	0.2	1	3	0.3	0	-2.73485	3.09965	1
2	2	0.2	1	3	0.4	0	-3.20037	2.79973	1
2	2	0.2	1	3	0.5	0	-3.57006	2.59969	1
2	2	0.2	2	1	0	0	-3.57006	2.49972	1
2	2	0.2	2	1	0.1	0	-3.57006	2.49972	1
2	2	0.2	2	1	0.2	0	-3.57006	2.49972	1
2	2	0.2	2	1	0.3	0	-3.57006	2.39977	1
2	2	0.2	2	1	0.4	0	-3.57006	2.39977	1
2	2	0.2	2	1	0.5	0	-4.83301	2.0998	1
2	2	0.2	2	2	0	0	-2.73485	3.29964	1
2	2	0.2	2	2	0.1	0	-2.73485	3.09965	1
2	2	0.2	2	2	0.2	0	-3.20037	2.79973	1
2	2	0.2	2	2	0.3	0	-3.57006	2.59969	1
2	2	0.2	2	2	0.4	0	-3.57006	2.49972	1
2	2	0.2	2	2	0.5	0	-3.57006	2.49972	1
2	2	0.2	2	3	0	0	-0.953191	4.09955	1
2	2	0.2	2	3	0.1	0	-0.953191	3.9996	1
2	2	0.2	2	3	0.2	0	-2.26051	3.59967	1
2	2	0.2	2	3	0.3	0	-2.73485	3.29964	1
2	2	0.2	2	3	0.4	0	-3.20037	2.89968	1
2	2	0.2	2	3	0.5	0	-3.20037	2.69967	1
2	2	0.2	3	1	0	0	-3.57006	2.59969	1
2	2	0.2	3	1	0.1	0	-3.57006	2.49972	1
2	2	0.2	3	1	0.2	0	-3.57006	2.49972	1
2	2	0.2	3	1	0.3	0	-3.57006	2.49972	1
2	2	0.2	3	1	0.4	0	-3.57006	2.39977	1
2	2	0.2	3	1	0.5	0	-3.85945	2.29979	1
2	2	0.2	3	2	0	0	-2.73485	3.40052	1
2	2	0.2	3	2	0.1	0	-2.73485	3.29964	1
2	2	0.2	3	2	0.2	0	-3.20037	2.89968	1
2	2	0.2	3	2	0.3	0	-3.20037	2.79973	1
2	2	0.2	3	2	0.4	0	-3.57006	2.59969	1
2	2	0.2	3	2	0.5	0	-3.57006	2.49972	1
2	2	0.2	3	3	0	0	-0.953191	4.09955	1
2	2	0.2	3	3	0.1	0	-0.953191	3.9996	1
2	2	0.2	3	3	0.2	0	-1.54906	3.79956	1
2	2	0.2	3	3	0.3	0	-2.73485	3.29964	1
2	2	0.2	3	3	0.4	0	-2.73485	3.09965	1
2	2	0.2	3	3	0.5	0	-3.20037	2.79973	1
2	2	-0.2	1	1	0	1	0	0	0
2	2	-0.2	1	1	0.1	1	0	0	0
2	2	-0.2	1	1	0.2	1	0	0	0
2	2	-0.2	1	1	0.3	1	0	0	0
2	2	-0.2	1	1	0.4	1	0	0	0
2	2	-0.2	1	1	0.5	1	0	0	0
2	2	-0.2	1	2	0	1	0	0	0
2	2	-0.2	1	2	0.1	1	0	0	0
2	2	-0.2	1	2	0.2	1	0	0	0
2	2	-0.2	1	2	0.3	1	0	0	0
2	2	-0.2	1	2	0.4	1	0	0	0
2	2	-0.2	1	2	0.5	1	0	0	0
2	2	-0.2	1	3	0	1	0	0	0
2	2	-0.2	1	3	0.1	1	0	0	0
2	2	-0.2	1	3	0.2	1	0	0	0
2	2	-0.2	1	3	0.3	1	0	0	0
2	2	-0.2	1	3	0.4	1	0	0	0
2	2	-0.2	1	3	0.5	1	0	0	0
2	2	-0.2	2	1	0	1	0	0	0
2	2	-0.2	2	1	0.1	1	0	0	0
2	2	-0.2	2	1	0.2	1	0	0	0
2	2	-0.2	2	1	0.3	1	0	0	0
2	2	-0.2	2	1	0.4	1	0	0	0
2	2	-0.2	2	1	0.5	1	0	0	0
2	2	-0.2	2	2	0	1	0	0	0
2	2	-0.2	2	2	0.1	1	0	0	0
2	2	-0.2	2	2	0.2	1	0	0	0
2	2	-0.2	2	2	0.3	1	0	0	0
2	2	-0.2	2	2	0.4	1	0	0	0
2	2	-0.2	2	2	0.5	1	0	0	0
2	2	-0.2	2	3	0	1	0	0	0
2	2	-0.2	2	3	0.1	1	0	0	0
2	2	-0.2	2	3	0.2	1	0	0	0
2	2	-0.2	2	3	0.3	1	0	0	0
2	2	-0.2	2	3	0.4	1	0	0	0
2	2	-0.2	2	3	0.5	1	0	0	0
2	2	-0.2	3	1	0	1	0	0	0
2	2	-0.2	3	1	0.1	1	0	0	0
2	2	-0.2	3	1	0.2	1	0	0	0
2	2	-0.2	3	1	0.3	1	0	0	0
2	2	-0.2	3	1	0.4	1	0	0	0
2	2	-0.2	3	1	0.5	1	0	0	0
2	2	-0.2	3	2	0	1	0	0	0
2	2	-0.2	3	2	0.1	1	0	0	0
2	2	-0.2	3	2	0.2	1	0	0	0
2	2	-0.2	3	2	0.3	1	0	0	0
2	2	-0.2	3	2	0.4	1	0	0	0
2	2	-0.2	3	2	0.5	1	0	0	0
2	2	-0.2	3	3	0	1	0	0	0
2	2	-0.2	3	3	0.1	1	0	0	0
2	2	-0.2	3	3	0.2	1	0	0	0
2	2	-0.2	3	3	0.3	1	0	0	0
2	2	-0.2	3	3	0.4	1	0	0	0
2	2	-0.2	3	3	0.5	1	0	0	0
2	2	-0.1	1	1	0	1	0	0	0
2	2	-0.1	1	1	0.1	1	0	0	0
2	2	-0.1	1	1	0.2	1	0	0	0
2	2	-0.1	1	1	0.3	1	0	0	0
2	2	-0.1	1	1	0.4	1	0	0	0
2	2	-0.1	1	1	0.5	1	0	0	0
2	2	-0.1	1	2	0	1	0	0	0
2	2	-0.1	1	2	0.1	1	0	0	0
2	2	-0.1	1	2	0.2	1	0	0	0
2	2	-0.1	1	2	0.3	1	0	0	0
2	2	-0.1	1	2	0.4	1	0	0	0
2	2	-0.1	1	2	0.5	1	0	0	0
2	2	-0.1	1	3	0	1	0	0	0
2	2	-0.1	1	3	0.1	1	0	0	0
2	2	-0.1	1	3	0.2	1	0	0	0
2	2	-0.1	1	3	0.3	1	0	0	0
2	2	-0.1	1	3	0.4	1	0	0	0
2	2	-0.1	1	3	0.5	1	0	0	0
2	2	-0.1	2	1	0	1	0	0	0
2	2	-0.1	2	1	0.1	1	0	0	0
2	2	-0.1	2	1	0.2	1	0	0	0
2	2	-0.1	2	1	0.3	1	0	0	0
2	2	-0.1	2	1	0.4	1	0	0	0
2	2	-0.1	2	1	0.5	1	0	0	0
2	2	-0.1	2	2	0	1	0	0	0
2	2	-0.1	2	2	0.1	1	0	0	0
2	2	-0.1	2	2	0.2	1	0	0	0
2	2	-0.1	2	2	0.3	1	0	0	0
2	2	-0.1	2	2	0.4	1	0	0	0
2	2	-0.1	2	2	0.5	1	0	0	0
2	2	-0.1	2	3	0	1	-2.47609	1.49988	1
2	2	-0.1	2	3	0.1	1	0	0	0
2	2	-0.1	2	3	0.2	1	0	0	0
2	2	-0.1	2	3	0.3	1	0	0	0
2	2	-0.1	2	3	0.4	1	0	0	0
2	2	-0.1	2	3	0.5	1	0	0	0
2	2	-0.1	3	1	0	1	0	0	0
2	2	-0.1	3	1	0.1	1	0	0	0
2	2	-0.1	3	1	0.2	1	0	0	0
2	2	-0.1	3	1	0.3	1	0	0	0
2	2	-0.1	3	1	0.4	1	0	0	0
2	2	-0.1	3	1	0.5	1	0	0	0
2	2	-0.1	3	2	0	1	0	0	0
2	2	-0.1	3	2	0.1	1	0	0	0
2	2	-0.1	3	2	0.2	1	0	0	0
2	2	-0.1	3	2	0.3	1	0	0	0
2	2	-0.1	3	2	0.4	1	0	0	0
2	2	-0.1	3	2	0.5	1	0	0	0
2	2	-0.1	3	3	0	1	-2.38124	1.69984	1
2	2	-0.1	3	3	0.1	1	-1.8945	1.39989	1
2	2	-0.1	3	3	0.2	1	0	0	0
2	2	-0.1	3	3	0.3	1	0	0	0
2	2	-0.1	3	3	0.4	1	0	0	0
2	2	-0.1	3	3	0.5	1	0	0	0
2	2	0	1	1	0	1	0	0	0
2	2	0	1	1	0.1	1	0	0	0
2	2	0	1	1	0.2	1	0	0	0
2	2	0	1	1	0.3	1	0	0	0
2	2	0	1	1	0.4	1	0	0	0
2	2	0	1	1	0.5	1	0	0	0
2	2	0	1	2	0	1	0	0	0
2	2	0	1	2	0.1	1	0	0	0
2	2	0	1	2	0.2	1	0	0	0
2	2	0	1	2	0.3	1	0	0	0
2	2	0	1	2	0.4	1	0	0	0
2	2	0	1	2	0.5	1	0	0	0
2	2	0	1	3	0	1	-2.23167	1.89984	1
2	2	0	1	3	0.1	1	-2.47609	1.29987	1
2	2	0	1	3	0.2	1	0	0	0
2	2	0	1	3	0.3	1	0	0	0
2	2	0	1	3	0.4	1	0	0	0
2	2	0	1	3	0.5	1	0	0	0
2	2	0	2	1	0	1	0	0	0
2	2	0	2	1	0.1	1	0	0	0
2	2	0	2	1	0.2	1	0	0	0
2	2	0	2	1	0.3	1	0	0	0
2	2	0	2	1	0.4	1	0	0	0
2	2	0	2	1	0.5	1	0	0	0
2	2	0	2	2	0	1	0	0	0
2	2	0	2	2	0.1	1	0	0	0
2	2	0	2	2	0.2	1	0	0	0
2	2	0	2	2	0.3	1	0	0	0
2	2	0	2	2	0.4	1	0	0	0
2	2	0	2	2	0.5	1	0	0	0
2	2	0	2	3	0	1	-2.48879	2.09974	1
2	2	0	2	3	0.1	1	-2.38124	1.69984	1
2	2	0	2	3	0.2	1	-1.8945	1.19988	1
2	2	0	2	3	0.3	1	0	0	0
2	2	0	2	3	0.4	1	0	0	0
2	2	0	2	3	0.5	1	0	0	0
2	2	0	3	1	0	1	0	0	0
2	2	0	3	1	0.1	1	0	0	0
2	2	0	3	1	0.2	1	0	0	0
2	2	0	3	1	0.3	1	0	0	0
2	2	0	3	1	0.4	1	0	0	0
2	2	0	3	1	0.5	1	0	0	0
2	2	0	3	2	0	1	-1.8945	1.39989	1
2	2	0	3	2	0.1	1	0	0	0
2	2	0	3	2	0.2	1	0	0	0
2	2	0	3	2	0.3	1	0	0	0
2	2	0	3	2	0.4	1	0	0	0
2	2	0	3	2	0.5	1	0	0	0
2	2	0	3	3	0	1	-2.48879	2.69969	1
2	2	0	3	3	0.1	1	-2.23167	1.99979	1
2	2	0	3	3	0.2	1	-2.47609	1.49988	1
2	2	0	3	3	0.3	1	0	0	0
2	2	0	3	3	0.4	1	0	0	0
2	2	0	3	3	0.5	1	0	0	0
2	2	0.1	1	1	0	1	0	0	0
2	2	0.1	1	1	0.1	1	0	0	0
2	2	0.1	1	1	0.2	1	0	0	0
2	2	0.1	1	1	0.3	1	0	0	0
2	2	0.1	1	1	0.4	1	0	0	0
2	2	0.1	1	1	0.5	1	0	0	0
2	2	0.1	1	2	0	1	0	0	0
2	2	0.1	1	2	0.1	1	0	0	0
2	2	0.1	1	2	0.2	1	0	0	0
2	2	0.1	1	2	0.3	1	0	0	0
2	2	0.1	1	2	0.4	1	0	0	0
2	2	0.1	1	2	0.5	1	0	0	0
2	2	0.1	1	3	0	1	-1.87164	2.29974	1
2	2	0.1	1	3	0.1	1	-2.48879	1.99979	1
2	2	0.1	1	3	0.2	1	-2.38124	1.69984	1
2	2	0.1	1	3	0.3	1	0	0	0
2	2	0.1	1	3	0.4	1	0	0	0
2	2	0.1	1	3	0.5	1	0	0	0
2	2	0.1	2	1	0	1	0	0	0
2	2	0.1	2	1	0.1	1	0	0	0
2	2	0.1	2	1	0.2	1	0	0	0
2	2	0.1	2	1	0.3	1	0	0	0
2	2	0.1	2	1	0.4	1	0	0	0
2	2	0.1	2	1	0.5	1	0	0	0
2	2	0.1	2	2	0	1	-2.47609	1.49988	1
2	2	0.1	2	2	0.1	1	0	0	0
2	2	0.1	2	2	0.2	1	0	0	0
2	2	0.1	2	2	0.3	1	0	0	0
2	2	0.1	2	2	0.4	1	0	0	0
2	2	0.1	2	2	0.5	1	0	0	0
2	2	0.1	2	3	0	1	-1.47511	2.99969	1
2	2	0.1	2	3	0.1	1	-2.48879	2.09974	1
2	2	0.1	2	3	0.2	1	-2.23167	1.89984	1
2	2	0.1	2	3	0.3	1	-2.47609	1.29987	1
2	2	0.1	2	3	0.4	1	0	0	0
2	2	0.1	2	3	0.5	1	0	0	0
2	2	0.1	3	1	0	1	0	0	0
2	2	0.1	3	1	0.1	1	0	0	0
2	2	0.1	3	1	0.2	1	0	0	0
2	2	0.1	3	1	0.3	1	0	0	0
2	2	0.1	3	1	0.4	1	0	0	0
2	2	0.1	3	1	0.5	1	0	0	0
2	2	0.1	3	2	0	1	-2.23167	1.89984	1
2	2	0.1	3	2	0.1	1	-2.47609	1.49988	1
2	2	0.1	3	2	0.2	1	0	0	0
2	2	0.1	3	2	0.3	1	0	0	0
2	2	0.1	3	2	0.4	1	0	0	0
2	2	0.1	3	2	0.5	1	0	0	0
2	2	0.1	3	3	0	1	-1.47511	3.19975	1
2	2	0.1	3	3	0.1	1	-1.87164	2.6997	1
2	2	0.1	3	3	0.2	1	-2.48879	2.09974	1
2	2	0.1	3	3	0.3	1	-2.23167	1.89984	1
2	2	0.1	3	3	0.4	1	0	0	0
2	2	0.1	3	3	0.5	1	0	0	0
2	2	0.2	1	1	0	1	0	0	0
2	2	0.2	1	1	0.1	1	0	0	0
2	2	0.2	1	1	0.2	1	0	0	0
2	2	0.2	1	1	0.3	1	0	0	0
2	2	0.2	1	1	0.4	1	0	0	0
2	2	0.2	1	1	0.5	1	0	0	0
2	2	0.2	1	2	0	1	-2.23167	1.89984	1
2	2	0.2	1	2	0.1	1	-2.47609	1.29987	1
2	2	0.2	1	2	0.2	1	0	0	0
2	2	0.2	1	2	0.3	1	0	0	0
2	2	0.2	1	2	0.4	1	0	0	0
2	2	0.2	1	2	0.5	1	0	0	0
2	2	0.2	1	3	0	1	-1.47511	2.7997	1
2	2	0.2	1	3	0.1	1	-1.47511	2.49971	1
2	2	0.2	1	3	0.2	1	-2.48879	2.09974	1
2	2	0.2	1	3	0.3	1	-2.23167	1.89984	1
2	2	0.2	1	3	0.4	1	-2.47609	1.29987	1
2	2	0.2	1	3	0.5	1	0	0	0
2	2	0.2	2	1	0	1	0	0	0
2	2	0.2	2	1	0.1	1	0	0	0
2	2	0.2	2	1	0.2	1	0	0	0
2	2	0.2	2	1	0.3	1	0	0	0
2	2	0.2	2	1	0.4	1	0	0	0
2	2	0.2	2	1	0.5	1	0	0	0
2	2	0.2	2	2	0	1	-2.48879	2.09974	1
2	2	0.2	2	2	0.1	1	-2.23167	1.89984	1
2	2	0.2	2	2	0.2	1	-2.47609	1.29987	1
2	2	0.2	2	2	0.3	1	0	0	0
2	2	0.2	2	2	0.4	1	0	0	0
2	2	0.2	2	2	0.5	1	0	0	0
2	2	0.2	2	3	0	1	-1.36215	3.20055	1
2	2	0.2	2	3	0.1	1	-1.47511	2.7997	1
2	2	0.2	2	3	0.2	1	-1.87164	2.29974	1
2	2	0.2	2	3	0.3	1	-2.48879	1.99979	1
2	2	0.2	2	3	0.4	1	-2.38124	1.69984	1
2	2	0.2	2	3	0.5	1	0	0	0
2	2	0.2	3	1	0	1	0	0	0
2	2	0.2	3	1	0.1	1	0	0	0
2	2	0.2	3	1	0.2	1	0	0	0
2	2	0.2	3	1	0.3	1	0	0	0
2	2	0.2	3	1	0.4	1	0	0	0
2	2	0.2	3	1	0.5	1	0	0	0
2	2	0.2	3	2	0	1	-1.87164	2.39971	1
2	2	0.2	3	2	0.1	1	-2.48879	2.09974	1
2	2	0.2	3	2	0.2	1	-2.23167	1.89984	1
2	2	0.2	3	2	0.3	1	-1.71899	1.09989	1
2	2	0.2	3	2	0.4	1	0	0	0
2	2	0.2	3	2	0.5	1	0	0	0
2	2	0.2	3	3	0	1	-1.36215	3.39962	1
2	2	0.2	3	3	0.1	1	-1.47511	3.10057	1
2	2	0.2	3	3	0.2	1	-1.47511	2.7997	1
2	2	0.2	3	3	0.3	1	-2.48879	2.09974	1
2	2	0.2	3	3	0.4	1	-2.23167	1.89984	1
2	2	0.2	3	3	0.5	1	-1.71899	1.09989	1
2	3	-0.2	1	1	0	0	0	0	0
2	3	-0.2	1	1	0.1	0	0	0	0
2	3	-0.2	1	1	0.2	0	0	0	0
2	3	-0.2	1	1	0.3	0	0	0	0
2	3	-0.2	1	1	0.4	0	0	0	0
2	3	-0.2	1	1	0.5	0	0	0	0
2	3	-0.2	1	2	0	0	0	0	0
2	3	-0.2	1	2	0.1	0	0	0	0
2	3	-0.2	1	2	0.2	0	0	0	0
2	3	-0.2	1	2	0.3	0	0	0	0
2	3	-0.2	1	2	0.4	0	0	0	0
2	3	-0.2	1	2	0.5	0	0	0	0
2	3	-0.2	1	3	0	0	3.3755	2.60068	1
2	3	-0.2	1	3	0.1	0	2.99236	2.3006	1
2	3	-0.2	1	3	0.2	0	2.99236	2.3006	1
2	3	-0.2	1	3	0.3	0	0	0	0
2	3	-0.2	1	3	0.4	0	0	0	0
2	3	-0.2	1	3	0.5	0	0	0	0
2	3	-0.2	2	1	0	0	0	0	0
2	3	-0.2	2	1	0.1	0	0	0	0
2	3	-0.2	2	1	0.2	0	0	0	0
2	3	-0.2	2	1	0.3	0	0	0	0
2	3	-0.2	2	1	0.4	0	0	0	0
2	3	-0.2	2	1	0.5	0	0	0	0
2	3	-0.2	2	2	0	0	2.2095	1.50036	1
2	3	-0.2	2	2	0.1	0	0	0	0
2	3	-0.2	2	2	0.2	0	0	0	0
2	3	-0.2	2	2	0.3	0	0	0	0
2	3	-0.2	2	2	0.4	0	0	0	0
2	3	-0.2	2	2	0.5	0	0	0	0
2	3	-0.2	2	3	0	0	3.42655	3.0008	1
2	3	-0.2	2	3	0.1	0	2.99236	2.3006	1
2	3	-0.2	2	3	0.2	0	2.99236	2.3006	1
2	3	-0.2	2	3	0.3	0	2.2095	1.50036	1
2	3	-0.2	2	3	0.4	0	0	0	0
2	3	-0.2	2	3	0.5	0	0	0	0
2	3	-0.2	3	1	0	0	0	0	0
2	3	-0.2	3	1	0.1	0	0	0	0
2	3	-0.2	3	1	0.2	0	0	0	0
2	3	-0.2	3	1	0.3	0	0	0	0
2	3	-0.2	3	1	0.4	0	0	0	0
2	3	-0.2	3	1	0.5	0	0	0	0
2	3	-0.2	3	2	0	0	2.99236	2.3006	1
2	3	-0.2	3	2	0.1	0	2.2095	1.50036	1
2	3	-0.2	3	2	0.2	0	0	0	0
2	3	-0.2	3	2	0.3	0	0	0	0
2	3	-0.2	3	2	0.4	0	0	0	0
2	3	-0.2	3	2	0.5	0	0	0	0
2	3	-0.2	3	3	0	0	3.35583	3.30088	1
2	3	-0.2	3	3	0.1	0	3.3755	2.60068	1
2	3	-0.2	3	3	0.2	0	2.99236	2.3006	1
2	3	-0.2	3	3	0.3	0	2.99236	2.3006	1
2	3	-0.2	3	3	0.4	0	0	0	0
2	3	-0.2	3	3	0.5	0	0	0	0
2	3	-0.1	1	1	0	0	0	0	0
2	3	-0.1	1	1	0.1	0	0	0	0
2	3	-0.1	1	1	0.2	0	0	0	0
2	3	-0.1	1	1	0.3	0	0	0	0
2	3	-0.1	1	1	0.4	0	0	0	0
2	3	-0.1	1	1	0.5	0	0	0	0
2	3	-0.1	1	2	0	0	2.99236	2.3006	1
2	3	-0.1	1	2	0.1	0	2.2095	1.50036	1
2	3	-0.1	1	2	0.2	0	0	0	0
2	3	-0.1	1	2	0.3	0	0	0	0
2	3	-0.1	1	2	0.4	0	0	0	0
2	3	-0.1	1	2	0.5	0	0	0	0
2	3	-0.1	1	3	0	0	3.35583	2.90076	1
2	3	-0.1	1	3	0.1	0	3.3755	2.60068	1
2	3	-0.1	1	3	0.2	0	2.99236	2.3006	1
2	3	-0.1	1	3	0.3	0	2.99236	2.3006	1
2	3	-0.1	1	3	0.4	0	0	0	0
2	3	-0.1	1	3	0.5	0	0	0	0
2	3	-0.1	2	1	0	0	0	0	0
2	3	-0.1	2	1	0.1	0	0	0	0
2	3	-0.1	2	1	0.2	0	0	0	0
2	3	-0.1	2	1	0.3	0	0	0	0
2	3	-0.1	2	1	0.4	0	0	0	0
2	3	-0.1	2	1	0.5	0	0	0	0
2	3	-0.1	2	2	0	0	2.99236	2.3006	1
2	3	-0.1	2	2	0.1	0	2.99236	2.3006	1
2	3	-0.1	2	2	0.2	0	0	0	0
2	3	-0.1	2	2	0.3	0	0	0	0
2	3	-0.1	2	2	0.4	0	0	0	0
2	3	-0.1	2	2	0.5	0	0	0	0
2	3	-0.1	2	3	0	0	3.48553	3.40091	1
2	3	-0.1	2	3	0.1	0	3.42655	2.70072	1
2	3	-0.1	2	3	0.2	0	2.99236	2.3006	1
2	3	-0.1	2	3	0.3	0	2.99236	2.3006	1
2	3	-0.1	2	3	0.4	0	2.2095	1.50036	1
2	3	-0.1	2	3	0.5	0	0	0	0
2	3	-0.1	3	1	0	0	0	0	0
2	3	-0.1	3	1	0.1	0	0	0	0
2	3	-0.1	3	1	0.2	0	0	0	0
2	3	-0.1	3	1	0.3	0	0	0	0
2	3	-0.1	3	1	0.4	0	0	0	0
2	3	-0.1	3	1	0.5	0	0	0	0
2	3	-0.1	3	2	0	0	2.99236	2.3006	1
2	3	-0.1	3	2	0.1	0	2.99236	2.3006	1
2	3	-0.1	3	2	0.2	0	2.99236	2.3006	1
2	3	-0.1	3	2	0.3	0	0	0	0
2	3	-0.1	3	2	0.4	0	0	0	0
2	3	-0.1	3	2	0.5	0	0	0	0
2	3	-0.1	3	3	0	0	3.71878	3.60078	1
2	3	-0.1	3	3	0.1	0	3.35583	3.20084	1
2	3	-0.1	3	3	0.2	0	3.3755	2.60068	1
2	3	-0.1	3	3	0.3	0	2.99236	2.3006	1
2	3	-0.1	3	3	0.4	0	2.99236	2.3006	1
2	3	-0.1	3	3	0.5	0	0	0	0
2	3	0	1	1	0	0	0	0	0
2	3	0	1	1	0.1	0	0	0	0
2	3	0	1	1	0.2	0	0	0	0
2	3	0	1	1	0.3	0	0	0	0
2	3	0	1	1	0.4	0	0	0	0
2	3	0	1	1	0.5	0	0	0	0
2	3	0	1	2	0	0	2.99236	2.3006	1
2	3	0	1	2	0.1	0	2.99236	2.3006	1
2	3	0	1	2	0.2	0	2.2095	1.50036	1
2	3	0	1	2	0.3	0	0	0	0
2	3	0	1	2	0.4	0	0	0	0
2	3	0	1	2	0.5	0	0	0	0
2	3	0	1	3	0	0	3.71878	3.50074	1
2	3	0	1	3	0.1	0	3.35583	2.90076	1
2	3	0	1	3	0.2	0	3.3755	2.60068	1
2	3	0	1	3	0.3	0	2.99236	2.3006	1
2	3	0	1	3	0.4	0	2.2095	1.50036	1
2	3	0	1	3	0.5	0	0	0	0
2	3	0	2	1	0	0	0	0	0
2	3	0	2	1	0.1	0	0	0	0
2	3	0	2	1	0.2	0	0	0	0
2	3	0	2	1	0.3	0	0	0	0
2	3	0	2	1	0.4	0	0	0	0
2	3	0	2	1	0.5	0	0	0	0
2	3	0	2	2	0	0	2.99236	2.3006	1
2	3	0	2	2	0.1	0	2.99236	2.3006	1
2	3	0	2	2	0.2	0	2.99236	2.3006	1
2	3	0	2	2	0.3	0	2.2095	1.50036	1
2	3	0	2	2	0.4	0	0	0	0
2	3	0	2	2	0.5	0	0	0	0
2	3	0	2	3	0	0	3.94075	3.70091	1
2	3	0	2	3	0.1	0	3.48553	3.40091	1
2	3	0	2	3	0.2	0	3.42655	2.70072	1
2	3	0	2	3	0.3	0	2.99236	2.3006	1
2	3	0	2	3	0.4	0	2.99236	2.3006	1
2	3	0	2	3	0.5	0	2.2095	1.50036	1
2	3	0	3	1	0	0	0	0	0
2	3	0	3	1	0.1	0	0	0	0
2	3	0	3	1	0.2	0	0	0	0
2	3	0	3	1	0.3	0	0	0	0
2	3	0	3	1	0.4	0	0	0	0
2	3	0	3	1	0.5	0	0	0	0
2	3	0	3	2	0	0	3.42655	2.70072	1
2	3	0	3	2	0.1	0	2.99236	2.3006	1
2	3	0	3	2	0.2	0	2.99236	2.3006	1
2	3	0	3	2	0.3	0	2.2095	1.50036	1
2	3	0	3	2	0.4	0	0	0	0
2	3	0	3	2	0.5	0	0	0	0
2	3	0	3	3	0	0	4.12798	3.80091	1
2	3	0	3	3	0.1	0	3.71878	3.50074	1
2	3	0	3	3	0.2	0	3.35583	2.90076	1
2	3	0	3	3	0.3	0	3.3755	2.60068	1
2	3	0	3	3	0.4	0	2.99236	2.3006	1
2	3	0	3	3	0.5	0	2.2095	1.50036	1
2	3	0.1	1	1	0	0	0	0	0
2	3	0.1	1	1	0.1	0	0	0	0
2	3	0.1	1	1	0.2	0	0	0	0
2	3	0.1	1	1	0.3	0	0	0	0
2	3	0.1	1	1	0.4	0	0	0	0
2	3	0.1	1	1	0.5	0	0	0	0
2	3	0.1	1	2	0	0	2.99236	2.3006	1
2	3	0.1	1	2	0.1	0	2.99236	2.3006	1
2	3	0.1	1	2	0.2	0	2.2095	1.50036	1
2	3	0.1	1	2	0.3	0	2.2095	1.50036	1
2	3	0.1	1	2	0.4	0	0	0	0
2	3	0.1	1	2	0.5	0	0	0	0
2	3	0.1	1	3	0	0	4.12798	3.70087	1
2	3	0.1	1	3	0.1	0	3.71878	3.20066	1
2	3	0.1	1	3	0.2	0	3.35583	2.90076	1
2	3	0.1	1	3	0.3	0	3.3755	2.60068	1
2	3	0.1	1	3	0.4	0	2.99236	2.3006	1
2	3	0.1	1	3	0.5	0	2.2095	1.50036	1
2	3	0.1	2	1	0	0	2.2095	1.50036	1
2	3	0.1	2	1	0.1	0	0	0	0
2	3	0.1	2	1	0.2	0	0	0	0
2	3	0.1	2	1	0.3	0	0	0	0
2	3	0.1	2	1	0.4	0	0	0	0
2	3	0.1	2	1	0.5	0	0	0	0
2	3	0.1	2	2	0	0	3.42655	2.70072	1
2	3	0.1	2	2	0.1	0	2.99236	2.3006	1
2	3	0.1	2	2	0.2	0	2.99236	2.3006	1
2	3	0.1	2	2	0.3	0	2.2095	1.50036	1
2	3	0.1	2	2	0.4	0	2.2095	1.50036	1
2	3	0.1	2	2	0.5	0	0	0	0
2	3	0.1	2	3	0	0	4.12798	3.80091	1
2	3	0.1	2	3	0.1	0	3.94075	3.60087	1
2	3	0.1	2	3	0.2	0	3.48553	3.10083	1
2	3	0.1	2	3	0.3	0	3.42655	2.70072	1
2	3	0.1	2	3	0.4	0	2.99236	2.3006	1
2	3	0.1	2	3	0.5	0	2.2095	1.50036	1
2	3	0.1	3	1	0	0	2.2095	1.50036	1
2	3	0.1	3	1	0.1	0	2.2095	1.50036	1
2	3	0.1	3	1	0.2	0	0	0	0
2	3	0.1	3	1	0.3	0	0	0	0
2	3	0.1	3	1	0.4	0	0	0	0
2	3	0.1	3	1	0.5	0	0	0	0
2	3	0.1	3	2	0	0	3.35583	2.90076	1
2	3	0.1	3	2	0.1	0	3.42655	2.70072	1
2	3	0.1	3	2	0.2	0	2.99236	2.3006	1
2	3	0.1	3	2	0.3	0	2.54631	1.60043	1
2	3	0.1	3	2	0.4	0	2.2095	1.50036	1
2	3	0.1	3	2	0.5	0	0	0	0
2	3	0.1	3	3	0	0	4.37844	3.90089	1
2	3	0.1	3	3	0.1	0	3.94075	3.60087	1
2	3	0.1	3	3	0.2	0	3.71878	3.20066	1
2	3	0.1	3	3	0.3	0	3.42655	2.70072	1
2	3	0.1	3	3	0.4	0	2.99236	2.3006	1
2	3	0.1	3	3	0.5	0	2.54631	1.60043	1
2	3	0.2	1	1	0	0	2.2095	1.50036	1
2	3	0.2	1	1	0.1	0	0	0	0
2	3	0.2	1	1	0.2	0	0	0	0
2	3	0.2	1	1	0.3	0	0	0	0
2	3	0.2	1	1	0.4	0	0	0	0
2	3	0.2	1	1	0.5	0	0	0	0
2	3	0.2	1	2	0	0	3.42655	2.70072	1
2	3	0.2	1	2	0.1	0	2.99236	2.3006	1
2	3	0.2	1	2	0.2	0	2.54631	1.60043	1
2	3	0.2	1	2	0.3	0	2.2095	1.50036	1
2	3	0.2	1	2	0.4	0	2.2095	1.50036	1
2	3	0.2	1	2	0.5	0	0	0	0
2	3	0.2	1	3	0	0	4.37844	3.80085	1
2	3	0.2	1	3	0.1	0	4.12798	3.40079	1
2	3	0.2	1	3	0.2	0	3.71878	3.20066	1
2	3	0.2	1	3	0.3	0	3.42655	2.70072	1
2	3	0.2	1	3	0.4	0	2.99236	2.3006	1
2	3	0.2	1	3	0.5	0	2.54631	1.60043	1
2	3	0.2	2	1	0	0	2.2095	1.50036	1
2	3	0.2	2	1	0.1	0	2.2095	1.50036	1
2	3	0.2	2	1	0.2	0	0	0	0
2	3	0.2	2	1	0.3	0	0	0	0
2	3	0.2	2	1	0.4	0	0	0	0
2	3	0.2	2	1	0.5	0	0	0	0
2	3	0.2	2	2	0	0	3.35583	2.90076	1
2	3	0.2	2	2	0.1	0	3.42655	2.70072	1
2	3	0.2	2	2	0.2	0	2.99236	2.3006	1
2	3	0.2	2	2	0.3	0	2.54631	1.60043	1
2	3	0.2	2	2	0.4	0	2.2095	1.50036	1
2	3	0.2	2	2	0.5	0	2.2095	1.50036	1
2	3	0.2	2	3	0	0	4.54593	4.00089	1
2	3	0.2	2	3	0.1	0	4.12798	3.70087	1
2	3	0.2	2	3	0.2	0	3.94075	3.30079	1
2	3	0.2	2	3	0.3	0	3.35583	2.90076	1
2	3	0.2	2	3	0.4	0	2.99236	2.3006	1
2	3	0.2	2	3	0.5	0	2.54631	1.60043	1
2	3	0.2	3	1	0	0	2.54631	1.60043	1
2	3	0.2	3	1	0.1	0	2.2095	1.50036	1
2	3	0.2	3	1	0.2	0	2.2095	1.50036	1
2	3	0.2	3	1	0.3	0	0	0	0
2	3	0.2	3	1	0.4	0	0	0	0
2	3	0.2	3	1	0.5	0	0	0	0
2	3	0.2	3	2	0	0	3.71878	3.20066	1
2	3	0.2	3	2	0.1	0	3.44092	2.80072	1
2	3	0.2	3	2	0.2	0	3.3755	2.60068	1
2	3	0.2	3	2	0.3	0	2.54631	1.60043	1
2	3	0.2	3	2	0.4	0	2.2095	1.50036	1
2	3	0.2	3	2	0.5	0	2.2095	1.50036	1
2	3	0.2	3	3	0	0	4.97379	4.10088	1
2	3	0.2	3	3	0.1	0	4.37844	3.80085	1
2	3	0.2	3	3	0.2	0	3.94075	3.30079	1
2	3	0.2	3	3	0.3	0	3.48553	3.10083	1
2	3	0.2	3	3	0.4	0	3.42655	2.70072	1
2	3	0.2	3	3	0.5	0	2.54631	1.60043	1
2	3	-0.2	1	1	0	1	0	0	0
2	3	-0.2	1	1	0.1	1	0	0	0
2	3	-0.2	1	1	0.2	1	0	0	0
2	3	-0.2	1	1	0.3	1	0	0	0
2	3	-0.2	1	1	0.4	1	0	0	0
2	3	-0.2	1	1	0.5	1	0	0	0
2	3	-0.2	1	2	0	1	0	0	0
2	3	-0.2	1	2	0.1	1	0	0	0
2	3	-0.2	1	2	0.2	1	0	0	0
2	3	-0.2	1	2	0.3	1	0	0	0
2	3	-0.2	1	2	0.4	1	0	0	0
2	3	-0.2	1	2	0.5	1	0	0	0
2	3	-0.2	1	3	0	1	0	0	0
2	3	-0.2	1	3	0.1	1	0	0	0
2	3	-0.2	1	3	0.2	1	0	0	0
2	3	-0.2	1	3	0.3	1	0	0	0
2	3	-0.2	1	3	0.4	1	0	0	0
2	3	-0.2	1	3	0.5	1	0	0	0
2	3	-0.2	2	1	0	1	0	0	0
2	3	-0.2	2	1	0.1	1	0	0	0
2	3	-0.2	2	1	0.2	1	0	0	0
2	3	-0.2	2	1	0.3	1	0	0	0
2	3	-0.2	2	1	0.4	1	0	0	0
2	3	-0.2	2	1	0.5	1	0	0	0
2	3	-0.2	2	2	0	1	0	0	0
2	3	-0.2	2	2	0.1	1	0	0	0
2	3	-0.2	2	2	0.2	1	0	0	0
2	3	-0.2	2	2	0.3	1	0	0	0
2	3	-0.2	2	2	0.4	1	0	0	0
2	3	-0.2	2	2	0.5	1	0	0	0
2	3	-0.2	2	3	0	1	0	0	0
2	3	-0.2	2	3	0.1	1	0	0	0
2	3	-0.2	2	3	0.2	1	0	0	0
2	3	-0.2	2	3	0.3	1	0	0	0
2	3	-0.2	2	3	0.4	1	0	0	0
2	3	-0.2	2	3	0.5	1	0	0	0
2	3	-0.2	3	1	0	1	0	0	0
2	3	-0.2	3	1	0.1	1	0	0	0
2	3	-0.2	3	1	0.2	1	0	0	0
2	3	-0.2	3	1	0.3	1	0	0	0
2	3	-0.2	3	1	0.4	1	0	0	0
2	3	-0.2	3	1	0.5	1	0	0	0
2	3	-0.2	3	2	0	1	0	0	0
2	3	-0.2	3	2	0.1	1	0	0	0
2	3	-0.2	3	2	0.2	1	0	0	0
2	3	-0.2	3	2	0.3	1	0	0	0
2	3	-0.2	3	2	0.4	1	0	0	0
2	3	-0.2	3	2	0.5	1	0	0	0
2	3	-0.2	3	3	0	1	0	0	0
2	3	-0.2	3	3	0.1	1	0	0	0
2	3	-0.2	3	3	0.2	1	0	0	0
2	3	-0.2	3	3	0.3	1	0	0	0
2	3	-0.2	3	3	0.4	1	0	0	0
2	3	-0.2	3	3	0.5	1	0	0	0
2	3	-0.1	1	1	0	1	0	0	0
2	3	-0.1	1	1	0.1	1	0	0	0
2	3	-0.1	1	1	0.2	1	0	0	0
2	3	-0.1	1	1	0.3	1	0	0	0
2	3	-0.1	1	1	0.4	1	0	0	0
2	3	-0.1	1	1	0.5	1	0	0	0
2	3	-0.1	1	2	0	1	0	0	0
2	3	-0.1	1	2	0.1	1	0	0	0
2	3	-0.1	1	2	0.2	1	0	0	0
2	3	-0.1	1	2	0.3	1	0	0	0
2	3	-0.1	1	2	0.4	1	0	0	0
2	3	-0.1	1	2	0.5	1	0	0	0
2	3	-0.1	1	3	0	1	0	0	0
2	3	-0.1	1	3	0.1	1	0	0	0
2	3	-0.1	1	3	0.2	1	0	0	0
2	3	-0.1	1	3	0.3	1	0	0	0
2	3	-0.1	1	3	0.4	1	0	0	0
2	3	-0.1	1	3	0.5	1	0	0	0
2	3	-0.1	2	1	0	1	0	0	0
2	3	-0.1	2	1	0.1	1	0	0	0
2	3	-0.1	2	1	0.2	1	0	0	0
2	3	-0.1	2	1	0.3	1	0	0	0
2	3	-0.1	2	1	0.4	1	0	0	0
2	3	-0.1	2	1	0.5	1	0	0	0
2	3	-0.1	2	2	0	1	0	0	0
2	3	-0.1	2	2	0.1	1	0	0	0
2	3	-0.1	2	2	0.2	1	0	0	0
2	3	-0.1	2	2	0.3	1	0	0	0
2	3	-0.1	2	2	0.4	1	0	0	0
2	3	-0.1	2	2	0.5	1	0	0	0
2	3	-0.1	2	3	0	1	0	0	0
2	3	-0.1	2	3	0.1	1	0	0	0
2	3	-0.1	2	3	0.2	1	0	0	0
2	3	-0.1	2	3	0.3	1	0	0	0
2	3	-0.1	2	3	0.4	1	0	0	0
2	3	-0.1	2	3	0.5	1	0	0	0
2	3	-0.1	3	1	0	1	0	0	0
2	3	-0.1	3	1	0.1	1	0	0	0
2	3	-0.1	3	1	0.2	1	0	0	0
2	3	-0.1	3	1	0.3	1	0	0	0
2	3	-0.1	3	1	0.4	1	0	0	0
2	3	-0.1	3	1	0.5	1	0	0	0
2	3	-0.1	3	2	0	1	0	0	0
2	3	-0.1	3	2	0.1	1	0	0	0
2	3	-0.1	3	2	0.2	1	0	0	0
2	3	-0.1	3	2	0.3	1	0	0	0
2	3	-0.1	3	2	0.4	1	0	0	0
2	3	-0.1	3	2	0.5	1	0	0	0
2	3	-0.1	3	3	0	1	0	0	0
2	3	-0.1	3	3	0.1	1	0	0	0
2	3	-0.1	3	3	0.2	1	0	0	0
2	3	-0.1	3	3	0.3	1	0	0	0
2	3	-0.1	3	3	0.4	1	0	0	0
2	3	-0.1	3	3	0.5	1	0	0	0
2	3	0	1	1	0	1	0	0	0
2	3	0	1	1	0.1	1	0	0	0
2	3	0	1	1	0.2	1	0	0	0
2	3	0	1	1	0.3	1	0	0	0
2	3	0	1	1	0.4	1	0	0	0
2	3	0	1	1	0.5	1	0	0	0
2	3	0	1	2	0	1	0	0	0
2	3	0	1	2	0.1	1	0	0	0
2	3	0	1	2	0.2	1	0	0	0
2	3	0	1	2	0.3	1	0	0	0
2	3	0	1	2	0.4	1	0	0	0
2	3	0	1	2	0.5	1	0	0	0
2	3	0	1	3	0	1	0	0	0
2	3	0	1	3	0.1	1	0	0	0
2	3	0	1	3	0.2	1	0	0	0
2	3	0	1	3	0.3	1	0	0	0
2	3	0	1	3	0.4	1	0	0	0
2	3	0	1	3	0.5	1	0	0	0
2	3	0	2	1	0	1	0	0	0
2	3	0	2	1	0.1	1	0	0	0
2	3	0	2	1	0.2	1	0	0	0
2	3	0	2	1	0.3	1	0	0	0
2	3	0	2	1	0.4	1	0	0	0
2	3	0	2	1	0.5	1	0	0	0
2	3	0	2	2	0	1	0	0	0
2	3	0	2	2	0.1	1	0	0	0
2	3	0	2	2	0.2	1	0	0	0
2	3	0	2	2	0.3	1	0	0	0
2	3	0	2	2	0.4	1	0	0	0
2	3	0	2	2	0.5	1	0	0	0
2	3	0	2	3	0	1	0	0	0
2	3	0	2	3	0.1	1	0	0	0
2	3	0	2	3	0.2	1	0	0	0
2	3	0	2	3	0.3	1	0	0	0
2	3	0	2	3	0.4	1	0	0	0
2	3	0	2	3	0.5	1	0	0	0
2	3	0	3	1	0	1	0	0	0
2	3	0	3	1	0.1	1	0	0	0
2	3	0	3	1	0.2	1	0	0	0
2	3	0	3	1	0.3	1	0	0	0
2	3	0	3	1	0.4	1	0	0	0
2	3	0	3	1	0.5	1	0	0	0
2	3	0	3	2	0	1	0	0	0
2	3	0	3	2	0.1	1	0	0	0
2	3	0	3	2	0.2	1	0	0	0
2	3	0	3	2	0.3	1	0	0	0
2	3	0	3	2	0.4	1	0	0	0
2	3	0	3	2	0.5	1	0	0	0
2	3	0	3	3	0	1	0	0	0
2	3	0	3	3	0.1	1	0	0	0
2	3	0	3	3	0.2	1	0	0	0
2	3	0	3	3	0.3	1	0	0	0
2	3	0	3	3	0.4	1	0	0	0
2	3	0	3	3	0.5	1	0	0	0
2	3	0.1	1	1	0	1	0	0	0
2	3	0.1	1	1	0.1	1	0	0	0
2	3	0.1	1	1	0.2	1	0	0	0
2	3	0.1	1	1	0.3	1	0	0	0
2	3	0.1	1	1	0.4	1	0	0	0
2	3	0.1	1	1	0.5	1	0	0	0
2	3	0.1	1	2	0	1	0	0	0
2	3	0.1	1	2	0.1	1	0	0	0
2	3	0.1	1	2	0.2	1	0	0	0
2	3	0.1	1	2	0.3	1	0	0	0
2	3	0.1	1	2	0.4	1	0	0	0
2	3	0.1	1	2	0.5	1	0	0	0
2	3	0.1	1	3	0	1	0	0	0
2	3	0.1	1	3	0.1	1	0	0	0
2	3	0.1	1	3	0.2	1	0	0	0
2	3	0.1	1	3	0.3	1	0	0	0
2	3	0.1	1	3	0.4	1	0	0	0
2	3	0.1	1	3	0.5	1	0	0	0
2	3	0.1	2	1	0	1	0	0	0
2	3	0.1	2	1	0.1	1	0	0	0
2	3	0.1	2	1	0.2	1	0	0	0
2	3	0.1	2	1	0.3	1	0	0	0
2	3	0.1	2	1	0.4	1	0	0	0
2	3	0.1	2	1	0.5	1	0	0	0
2	3	0.1	2	2	0	1	0	0	0
2	3	0.1	2	2	0.1	1	0	0	0
2	3	0.1	2	2	0.2	1	0	0	0
2	3	0.1	2	2	0.3	1	0	0	0
2	3	0.1	2	2	0.4	1	0	0	0
2	3	0.1	2	2	0.5	1	0	0	0
2	3	0.1	2	3	0	1	0	0	0
2	3	0.1	2	3	0.1	1	0	0	0
2	3	0.1	2	3	0.2	1	0	0	0
2	3	0.1	2	3	0.3	1	0	0	0
2	3	0.1	2	3	0.4	1	0	0	0
2	3	0.1	2	3	0.5	1	0	0	0
2	3	0.1	3	1	0	1	0	0	0
2	3	0.1	3	1	0.1	1	0	0	0
2	3	0.1	3	1	0.2	1	0	0	0
2	3	0.1	3	1	0.3	1	0	0	0
2	3	0.1	3	1	0.4	1	0	0	0
2	3	0.1	3	1	0.5	1	0	0	0
2	3	0.1	3	2	0	1	0	0	0
2	3	0.1	3	2	0.1	1	0	0	0
2	3	0.1	3	2	0.2	1	0	0	0
2	3	0.1	3	2	0.3	1	0	0	0
2	3	0.1	3	2	0.4	1	0	0	0
2	3	0.1	3	2	0.5	1	0	0	0
2	3	0.1	3	3	0	1	3.64092	1.50036	1
2	3	0.1	3	3	0.1	1	0	0	0
2	3	0.1	3	3	0.2	1	0	0	0
2	3	0.1	3	3	0.3	1	0	0	0
2	3	0.1	3	3	0.4	1	0	0	0
2	3	0.1	3	3	0.5	1	0	0	0
2	3	0.2	1	1	0	1	0	0	0
2	3	0.2	1	1	0.1	1	0	0	0
2	3	0.2	1	1	0.2	1	0	0	0
2	3	0.2	1	1	0.3	1	0	0	0
2	3	0.2	1	1	0.4	1	0	0	0
2	3	0.2	1	1	0.5	1	0	0	0
2	3	0.2	1	2	0	1	0	0	0
2	3	0.2	1	2	0.1	1	0	0	0
2	3	0.2	1	2	0.2	1	0	0	0
2	3	0.2	1	2	0.3	1	0	0	0
2	3	0.2	1	2	0.4	1	0	0	0
2	3	0.2	1	2	0.5	1	0	0	0
2	3	0.2	1	3	0	1	3.64092	1.50036	1
2	3	0.2	1	3	0.1	1	0	0	0
2	3	0.2	1	3	0.2	1	0	0	0
2	3	0.2	1	3	0.3	1	0	0	0
2	3	0.2	1	3	0.4	1	0	0	0
2	3	0.2	1	3	0.5	1	0	0	0
2	3	0.2	2	1	0	1	0	0	0
2	3	0.2	2	1	0.1	1	0	0	0
2	3	0.2	2	1	0.2	1	0	0	0
2	3	0.2	2	1	0.3	1	0	0	0
2	3	0.2	2	1	0.4	1	0	0	0
2	3	0.2	2	1	0.5	1	0	0	0
2	3	0.2	2	2	0	1	0	0	0
2	3	0.2	2	2	0.1	1	0	0	0
2	3	0.2	2	2	0.2	1	0	0	0
2	3	0.2	2	2	0.3	1	0	0	0
2	3	0.2	2	2	0.4	1	0	0	0
2	3	0.2	2	2	0.5	1	0	0	0
2	3	0.2	2	3	0	1	4.83323	2.3006	1
2	3	0.2	2	3	0.1	1	3.64092	1.50036	1
2	3	0.2	2	3	0.2	1	0	0	0
2	3	0.2	2	3	0.3	1	0	0	0
2	3	0.2	2	3	0.4	1	0	0	0
2	3	0.2	2	3	0.5	1	0	0	0
2	3	0.2	3	1	0	1	0	0	0
2	3	0.2	3	1	0.1	1	0	0	0
2	3	0.2	3	1	0.2	1	0	0	0
2	3	0.2	3	1	0.3	1	0	0	0
2	3	0.2	3	1	0.4	1	0	0	0
2	3	0.2	3	1	0.5	1	0	0	0
2	3	0.2	3	2	0	1	0	0	0
2	3	0.2	3	2	0.1	1	0	0	0
2	3	0.2	3	2	0.2	1	0	0	0
2	3	0.2	3	2	0.3	1	0	0	0
2	3	0.2	3	2	0.4	1	0	0	0
2	3	0.2	3	2	0.5	1	0	0	0
2	3	0.2	3	3	0	1	4.83323	2.60068	1
2	3	0.2	3	3	0.1	1	4.83323	2.3006	1
2	3	0.2	3	3	0.2	1	3.64092	1.50036	1
2	3	0.2	3	3	0.3	1	0	0	0
2	3	0.2	3	3	0.4	1	0	0	0
2	3	0.2	3	3	0.5	1	0	0	0
2	3	0.2	3	3	0.1	1	4.83323	0.30006	1
2	3	0.2	3	3	0.2	1	3.64092	0.30005	1
2	3	0.2	3	3	0.3	1	0	0	0
2	3	0.2	3	3	0.4	1	0	0	0
2	3	0.2	3	3	0.5	1	0	0	0
2	3	0.2	3	3	0.4	1	0	0.29998	0
2	3	0.2	3	3	0.5	1	0	0.29998	0
2	1	-0.2	1	1	0	2	0	0	0
2	1	-0.2	1	1	0.1	2	0	0	0
2	1	-0.2	1	1	0.2	2	0	0	0
2	1	-0.2	1	1	0.3	2	0	0	0
2	1	-0.2	1	1	0.4	2	0	0	0
2	1	-0.2	1	1	0.5	2	0	0	0
2	1	-0.2	1	2	0	2	0	0	0
2	1	-0.2	1	2	0.1	2	0	0	0
2	1	-0.2	1	2	0.2	2	0	0	0
2	1	-0.2	1	2	0.3	2	0	0	0
2	1	-0.2	1	2	0.4	2	0	0	0
2	1	-0.2	1	2	0.5	2	0	0	0
2	1	-0.2	1	3	0	2	6.49207	1.09988	1
2	1	-0.2	1	3	0.1	2	6.49207	1.09988	1
2	1	-0.2	1	3	0.2	2	0.549793	0.99986	1
2	1	-0.2	1	3	0.3	2	0	0	0
2	1	-0.2	1	3	0.4	2	0	0	0
2	1	-0.2	1	3	0.5	2	0	0	0
2	1	-0.2	2	1	0	2	0	0	0
2	1	-0.2	2	1	0.1	2	0	0	0
2	1	-0.2	2	1	0.2	2	0	0	0
2	1	-0.2	2	1	0.3	2	0	0	0
2	1	-0.2	2	1	0.4	2	0	0	0
2	1	-0.2	2	1	0.5	2	0	0	0
2	1	-0.2	2	2	0	2	0.549793	0.99986	1
2	1	-0.2	2	2	0.1	2	0	0	0
2	1	-0.2	2	2	0.2	2	0	0	0
2	1	-0.2	2	2	0.3	2	0	0	0
2	1	-0.2	2	2	0.4	2	0	0	0
2	1	-0.2	2	2	0.5	2	0	0	0
2	1	-0.2	2	3	0	2	6.49207	1.19986	1
2	1	-0.2	2	3	0.1	2	6.49207	1.09988	1
2	1	-0.2	2	3	0.2	2	0.549793	0.99986	1
2	1	-0.2	2	3	0.3	2	0	0	0
2	1	-0.2	2	3	0.4	2	0	0	0
2	1	-0.2	2	3	0.5	2	0	0	0
2	1	-0.2	3	1	0	2	0	0	0
2	1	-0.2	3	1	0.1	2	0	0	0
2	1	-0.2	3	1	0.2	2	0	0	0
2	1	-0.2	3	1	0.3	2	0	0	0
2	1	-0.2	3	1	0.4	2	0	0	0
2	1	-0.2	3	1	0.5	2	0	0	0
2	1	-0.2	3	2	0	2	0.549793	0.99986	1
2	1	-0.2	3	2	0.1	2	0.549793	0.99986	1
2	1	-0.2	3	2	0.2	2	0	0	0
2	1	-0.2	3	2	0.3	2	0	0	0
2	1	-0.2	3	2	0.4	2	0	0	0
2	1	-0.2	3	2	0.5	2	0	0	0
2	1	-0.2	3	3	0	2	6.49207	1.19986	1
2	1	-0.2	3	3	0.1	2	6.49207	1.09988	1
2	1	-0.2	3	3	0.2	2	6.49207	1.09988	1
2	1	-0.2	3	3	0.3	2	0.549793	0.99986	1
2	1	-0.2	3	3	0.4	2	0	0	0
2	1	-0.2	3	3	0.5	2	0	0	0
2	1	-0.1	1	1	0	2	0	0	0
2	1	-0.1	1	1	0.1	2	0	0	0
2	1	-0.1	1	1	0.2	2	0	0	0
2	1	-0.1	1	1	0.3	2	0	0	0
2	1	-0.1	1	1	0.4	2	0	0	0
2	1	-0.1	1	1	0.5	2	0	0	0
2	1	-0.1	1	2	0	2	0.549793	0.99986	1
2	1	-0.1	1	2	0.1	2	0	0	0
2	1	-0.1	1	2	0.2	2	0	0	0
2	1	-0.1	1	2	0.3	2	0	0	0
2	1	-0.1	1	2	0.4	2	0	0	0
2	1	-0.1	1	2	0.5	2	0	0	0
2	1	-0.1	1	3	0	2	6.49207	1.19986	1
2	1	-0.1	1	3	0.1	2	6.49207	1.19986	1
2	1	-0.1	1	3	0.2	2	6.49207	1.09988	1
2	1	-0.1	1	3	0.3	2	0.549793	0.99986	1
2	1	-0.1	1	3	0.4	2	0	0	0
2	1	-0.1	1	3	0.5	2	0	0	0
2	1	-0.1	2	1	0	2	0	0	0
2	1	-0.1	2	1	0.1	2	0	0	0
2	1	-0.1	2	1	0.2	2	0	0	0
2	1	-0.1	2	1	0.3	2	0	0	0
2	1	-0.1	2	1	0.4	2	0	0	0
2	1	-0.1	2	1	0.5	2	0	0	0
2	1	-0.1	2	2	0	2	6.49207	1.09988	1
2	1	-0.1	2	2	0.1	2	0.549793	0.99986	1
2	1	-0.1	2	2	0.2	2	0	0	0
2	1	-0.1	2	2	0.3	2	0	0	0
2	1	-0.1	2	2	0.4	2	0	0	0
2	1	-0.1	2	2	0.5	2	0	0	0
2	1	-0.1	2	3	0	2	6.49207	1.19986	1
2	1	-0.1	2	3	0.1	2	6.49207	1.19986	1
2	1	-0.1	2	3	0.2	2	6.49207	1.09988	1
2	1	-0.1	2	3	0.3	2	6.49207	1.09988	1
2	1	-0.1	2	3	0.4	2	0	0	0
2	1	-0.1	2	3	0.5	2	0	0	0
2	1	-0.1	3	1	0	2	0	0	0
2	1	-0.1	3	1	0.1	2	0	0	0
2	1	-0.1	3	1	0.2	2	0	0	0
2	1	-0.1	3	1	0.3	2	0	0	0
2	1	-0.1	3	1	0.4	2	0	0	0
2	1	-0.1	3	1	0.5	2	0	0	0
2	1	-0.1	3	2	0	2	6.49207	1.09988	1
2	1	-0.1	3	2	0.1	2	6.49207	0.9999	1
2	1	-0.1	3	2	0.2	2	0.549793	0.99986	1
2	1	-0.1	3	2	0.3	2	0	0	0
2	1	-0.1	3	2	0.4	2	0	0	0
2	1	-0.1	3	2	0.5	2	0	0	0
2	1	-0.1	3	3	0	2	6.49207	1.29985	1
2	1	-0.1	3	3	0.1	2	6.49207	1.19986	1
2	1	-0.1	3	3	0.2	2	6.49207	1.09988	1
2	1	-0.1	3	3	0.3	2	6.49207	1.09988	1
2	1	-0.1	3	3	0.4	2	0.549793	0.99986	1
2	1	-0.1	3	3	0.5	2	0	0	0
2	1	0	1	1	0	2	0	0	0
2	1	0	1	1	0.1	2	0	0	0
2	1	0	1	1	0.2	2	0	0	0
2	1	0	1	1	0.3	2	0	0	0
2	1	0	1	1	0.4	2	0	0	0
2	1	0	1	1	0.5	2	0	0	0
2	1	0	1	2	0	2	6.49207	1.09988	1
2	1	0	1	2	0.1	2	6.49207	1.09988	1
2	1	0	1	2	0.2	2	0	0	0
2	1	0	1	2	0.3	2	0	0	0
2	1	0	1	2	0.4	2	0	0	0
2	1	0	1	2	0.5	2	0	0	0
2	1	0	1	3	0	2	6.49207	1.29985	1
2	1	0	1	3	0.1	2	6.49207	1.19986	1
2	1	0	1	3	0.2	2	6.49207	1.19986	1
2	1	0	1	3	0.3	2	6.49207	1.09988	1
2	1	0	1	3	0.4	2	6.49207	1.09988	1
2	1	0	1	3	0.5	2	0	0	0
2	1	0	2	1	0	2	0	0	0
2	1	0	2	1	0.1	2	0	0	0
2	1	0	2	1	0.2	2	0	0	0
2	1	0	2	1	0.3	2	0	0	0
2	1	0	2	1	0.4	2	0	0	0
2	1	0	2	1	0.5	2	0	0	0
2	1	0	2	2	0	2	6.49207	1.09988	1
2	1	0	2	2	0.1	2	6.49207	1.09988	1
2	1	0	2	2	0.2	2	6.49207	0.9999	1
2	1	0	2	2	0.3	2	0	0	0
2	1	0	2	2	0.4	2	0	0	0
2	1	0	2	2	0.5	2	0	0	0
2	1	0	2	3	0	2	6.49207	1.29985	1
2	1	0	2	3	0.1	2	6.49207	1.19986	1
2	1	0	2	3	0.2	2	6.49207	1.19986	1
2	1	0	2	3	0.3	2	6.49207	1.09988	1
2	1	0	2	3	0.4	2	6.49207	1.09988	1
2	1	0	2	3	0.5	2	0	0	0
2	1	0	3	1	0	2	0	0	0
2	1	0	3	1	0.1	2	0	0	0
2	1	0	3	1	0.2	2	0	0	0
2	1	0	3	1	0.3	2	0	0	0
2	1	0	3	1	0.4	2	0	0	0
2	1	0	3	1	0.5	2	0	0	0
2	1	0	3	2	0	2	6.49207	1.19986	1
2	1	0	3	2	0.1	2	6.49207	1.09988	1
2	1	0	3	2	0.2	2	6.49207	1.09988	1
2	1	0	3	2	0.3	2	0.549793	0.99986	1
2	1	0	3	2	0.4	2	0	0	0
2	1	0	3	2	0.5	2	0	0	0
2	1	0	3	3	0	2	6.49207	1.29985	1
2	1	0	3	3	0.1	2	6.49207	1.29985	1
2	1	0	3	3	0.2	2	6.49207	1.19986	1
2	1	0	3	3	0.3	2	6.49207	1.09988	1
2	1	0	3	3	0.4	2	6.49207	1.09988	1
2	1	0	3	3	0.5	2	0.549793	0.99986	1
2	1	0.1	1	1	0	2	0	0	0
2	1	0.1	1	1	0.1	2	0	0	0
2	1	0.1	1	1	0.2	2	0	0	0
2	1	0.1	1	1	0.3	2	0	0	0
2	1	0.1	1	1	0.4	2	0	0	0
2	1	0.1	1	1	0.5	2	0	0	0
2	1	0.1	1	2	0	2	6.49207	1.19986	1
2	1	0.1	1	2	0.1	2	6.49207	1.09988	1
2	1	0.1	1	2	0.2	2	6.49207	1.09988	1
2	1	0.1	1	2	0.3	2	6.49207	0.9999	1
2	1	0.1	1	2	0.4	2	0	0	0
2	1	0.1	1	2	0.5	2	0	0	0
2	1	0.1	1	3	0	2	6.49207	1.29985	1
2	1	0.1	1	3	0.1	2	6.49207	1.29985	1
2	1	0.1	1	3	0.2	2	6.49207	1.19986	1
2	1	0.1	1	3	0.3	2	6.49207	1.19986	1
2	1	0.1	1	3	0.4	2	6.49207	1.09988	1
2	1	0.1	1	3	0.5	2	6.49207	1.09988	1
2	1	0.1	2	1	0	2	0	0	0
2	1	0.1	2	1	0.1	2	0	0	0
2	1	0.1	2	1	0.2	2	0	0	0
2	1	0.1	2	1	0.3	2	0	0	0
2	1	0.1	2	1	0.4	2	0	0	0
2	1	0.1	2	1	0.5	2	0	0	0
2	1	0.1	2	2	0	2	6.49207	1.19986	1
2	1	0.1	2	2	0.1	2	6.49207	1.09988	1
2	1	0.1	2	2	0.2	2	6.49207	1.09988	1
2	1	0.1	2	2	0.3	2	6.49207	1.09988	1
2	1	0.1	2	2	0.4	2	0	0	0
2	1	0.1	2	2	0.5	2	0	0	0
2	1	0.1	2	3	0	2	6.49207	1.29985	1
2	1	0.1	2	3	0.1	2	6.49207	1.29985	1
2	1	0.1	2	3	0.2	2	6.49207	1.19986	1
2	1	0.1	2	3	0.3	2	6.49207	1.19986	1
2	1	0.1	2	3	0.4	2	6.49207	1.09988	1
2	1	0.1	2	3	0.5	2	6.49207	1.09988	1
2	1	0.1	3	1	0	2	6.49207	0.9999	1
2	1	0.1	3	1	0.1	2	0.549793	0.99986	1
2	1	0.1	3	1	0.2	2	0	0	0
2	1	0.1	3	1	0.3	2	0	0	0
2	1	0.1	3	1	0.4	2	0	0	0
2	1	0.1	3	1	0.5	2	0	0	0
2	1	0.1	3	2	0	2	6.49207	1.19986	1
2	1	0.1	3	2	0.1	2	6.49207	1.19986	1
2	1	0.1	3	2	0.2	2	6.49207	1.09988	1
2	1	0.1	3	2	0.3	2	6.49207	1.09988	1
2	1	0.1	3	2	0.4	2	6.49207	0.9999	1
2	1	0.1	3	2	0.5	2	0	0	0
2	1	0.1	3	3	0	2	6.49207	1.39984	1
2	1	0.1	3	3	0.1	2	6.49207	1.29985	1
2	1	0.1	3	3	0.2	2	6.49207	1.19986	1
2	1	0.1	3	3	0.3	2	6.49207	1.19986	1
2	1	0.1	3	3	0.4	2	6.49207	1.09988	1
2	1	0.1	3	3	0.5	2	6.49207	1.09988	1
2	1	0.2	1	1	0	2	6.49207	0.9999	1
2	1	0.2	1	1	0.1	2	0	0	0
2	1	0.2	1	1	0.2	2	0	0	0
2	1	0.2	1	1	0.3	2	0	0	0
2	1	0.2	1	1	0.4	2	0	0	0
2	1	0.2	1	1	0.5	2	0	0	0
2	1	0.2	1	2	0	2	6.49207	1.19986	1
2	1	0.2	1	2	0.1	2	6.49207	1.19986	1
2	1	0.2	1	2	0.2	2	6.49207	1.09988	1
2	1	0.2	1	2	0.3	2	6.49207	1.09988	1
2	1	0.2	1	2	0.4	2	6.49207	1.09988	1
2	1	0.2	1	2	0.5	2	0	0	0
2	1	0.2	1	3	0	2	6.49207	1.39984	1
2	1	0.2	1	3	0.1	2	6.49207	1.29985	1
2	1	0.2	1	3	0.2	2	6.49207	1.19986	1
2	1	0.2	1	3	0.3	2	6.49207	1.19986	1
2	1	0.2	1	3	0.4	2	6.49207	1.19986	1
2	1	0.2	1	3	0.5	2	6.49207	1.09988	1
2	1	0.2	2	1	0	2	6.49207	1.09988	1
2	1	0.2	2	1	0.1	2	6.49207	0.9999	1
2	1	0.2	2	1	0.2	2	0	0	0
2	1	0.2	2	1	0.3	2	0	0	0
2	1	0.2	2	1	0.4	2	0	0	0
2	1	0.2	2	1	0.5	2	0	0	0
2	1	0.2	2	2	0	2	6.49207	1.19986	1
2	1	0.2	2	2	0.1	2	6.49207	1.19986	1
2	1	0.2	2	2	0.2	2	6.49207	1.09988	1
2	1	0.2	2	2	0.3	2	6.49207	1.09988	1
2	1	0.2	2	2	0.4	2	6.49207	1.09988	1
2	1	0.2	2	2	0.5	2	6.49207	0.9999	1
2	1	0.2	2	3	0	2	6.49207	1.39984	1
2	1	0.2	2	3	0.1	2	6.49207	1.29985	1
2	1	0.2	2	3	0.2	2	6.49207	1.29985	1
2	1	0.2	2	3	0.3	2	6.49207	1.19986	1
2	1	0.2	2	3	0.4	2	6.49207	1.19986	1
2	1	0.2	2	3	0.5	2	6.49207	1.09988	1
2	1	0.2	3	1	0	2	6.49207	1.09988	1
2	1	0.2	3	1	0.1	2	6.49207	1.09988	1
2	1	0.2	3	1	0.2	2	6.49207	0.9999	1
2	1	0.2	3	1	0.3	2	0	0	0
2	1	0.2	3	1	0.4	2	0	0	0
2	1	0.2	3	1	0.5	2	0	0	0
2	1	0.2	3	2	0	2	6.49207	1.19986	1
2	1	0.2	3	2	0.1	2	6.49207	1.19986	1
2	1	0.2	3	2	0.2	2	6.49207	1.19986	1
2	1	0.2	3	2	0.3	2	6.49207	1.09988	1
2	1	0.2	3	2	0.4	2	6.49207	1.09988	1
2	1	0.2	3	2	0.5	2	6.49207	0.9999	1
2	1	0.2	3	3	0	2	6.49207	1.39984	1
2	1	0.2	3	3	0.1	2	6.49207	1.29985	1
2	1	0.2	3	3	0.2	2	6.49207	1.29985	1
2	1	0.2	3	3	0.3	2	6.49207	1.19986	1
2	1	0.2	3	3	0.4	2	6.49207	1.19986	1
2	1	0.2	3	3	0.5	2	6.49207	1.09988	1
2	2	-0.2	1	1	0	2	-2.48879	1.79978	1
2	2	-0.2	1	1	0.1	2	-2.23167	1.69983	1
2	2	-0.2	1	1	0.2	2	0	0	0
2	2	-0.2	1	1	0.3	2	0	0	0
2	2	-0.2	1	1	0.4	2	0	0	0
2	2	-0.2	1	1	0.5	2	0	0	0
2	2	-0.2	1	2	0	2	-1.36215	2.49972	1
2	2	-0.2	1	2	0.1	2	-1.36215	2.49972	1
2	2	-0.2	1	2	0.2	2	-1.47511	2.29979	1
2	2	-0.2	1	2	0.3	2	-1.47511	2.29979	1
2	2	-0.2	1	2	0.4	2	-2.48879	1.79978	1
2	2	-0.2	1	2	0.5	2	-2.23167	1.69983	1
2	2	-0.2	1	3	0	2	-0.796266	3.40052	1
2	2	-0.2	1	3	0.1	2	-1.11029	3.19965	1
2	2	-0.2	1	3	0.2	2	-1.36215	2.69975	1
2	2	-0.2	1	3	0.3	2	-1.36215	2.49972	1
2	2	-0.2	1	3	0.4	2	-1.47511	2.29979	1
2	2	-0.2	1	3	0.5	2	-1.47511	2.29979	1
2	2	-0.2	2	1	0	2	-2.48879	1.99979	1
2	2	-0.2	2	1	0.1	2	-2.48879	1.79978	1
2	2	-0.2	2	1	0.2	2	-2.23167	1.69983	1
2	2	-0.2	2	1	0.3	2	-2.23167	1.69983	1
2	2	-0.2	2	1	0.4	2	0	0	0
2	2	-0.2	2	1	0.5	2	0	0	0
2	2	-0.2	2	2	0	2	-1.36215	2.69975	1
2	2	-0.2	2	2	0.1	2	-1.36215	2.49972	1
2	2	-0.2	2	2	0.2	2	-1.47511	2.39974	1
2	2	-0.2	2	2	0.3	2	-1.47511	2.29979	1
2	2	-0.2	2	2	0.4	2	-2.48879	1.99979	1
2	2	-0.2	2	2	0.5	2	-2.48879	1.79978	1
2	2	-0.2	2	3	0	2	-0.796266	3.59959	1
2	2	-0.2	2	3	0.1	2	-1.11029	3.30053	1
2	2	-0.2	2	3	0.2	2	-1.36215	2.89968	1
2	2	-0.2	2	3	0.3	2	-1.36215	2.69975	1
2	2	-0.2	2	3	0.4	2	-1.36215	2.49972	1
2	2	-0.2	2	3	0.5	2	-1.47511	2.29979	1
2	2	-0.2	3	1	0	2	-1.47511	2.29979	1
2	2	-0.2	3	1	0.1	2	-2.48879	1.99979	1
2	2	-0.2	3	1	0.2	2	-2.48879	1.79978	1
2	2	-0.2	3	1	0.3	2	-2.23167	1.69983	1
2	2	-0.2	3	1	0.4	2	0	0	0
2	2	-0.2	3	1	0.5	2	0	0	0
2	2	-0.2	3	2	0	2	-1.36215	2.89968	1
2	2	-0.2	3	2	0.1	2	-1.36215	2.69975	1
2	2	-0.2	3	2	0.2	2	-1.36215	2.49972	1
2	2	-0.2	3	2	0.3	2	-1.47511	2.29979	1
2	2	-0.2	3	2	0.4	2	-1.47511	2.29979	1
2	2	-0.2	3	2	0.5	2	-2.48879	1.79978	1
2	2	-0.2	3	3	0	2	-0.796266	3.69961	1
2	2	-0.2	3	3	0.1	2	-0.796266	3.59959	1
2	2	-0.2	3	3	0.2	2	-1.11029	3.19965	1
2	2	-0.2	3	3	0.3	2	-1.36215	2.7997	1
2	2	-0.2	3	3	0.4	2	-1.36215	2.49972	1
2	2	-0.2	3	3	0.5	2	-1.47511	2.29979	1
2	2	-0.1	1	1	0	2	-1.47511	2.29979	1
2	2	-0.1	1	1	0.1	2	-1.47511	2.19979	1
2	2	-0.1	1	1	0.2	2	-2.48879	1.79978	1
2	2	-0.1	1	1	0.3	2	-2.48879	1.79978	1
2	2	-0.1	1	1	0.4	2	-2.23167	1.19988	1
2	2	-0.1	1	1	0.5	2	0	0	0
2	2	-0.1	1	2	0	2	-1.36215	2.59969	1
2	2	-0.1	1	2	0.1	2	-1.36215	2.49972	1
2	2	-0.1	1	2	0.2	2	-1.36215	2.49972	1
2	2	-0.1	1	2	0.3	2	-1.47511	2.29979	1
2	2	-0.1	1	2	0.4	2	-1.47511	2.29979	1
2	2	-0.1	1	2	0.5	2	-1.47511	2.19979	1
2	2	-0.1	1	3	0	2	-0.796266	3.59959	1
2	2	-0.1	1	3	0.1	2	-0.796266	3.29964	1
2	2	-0.1	1	3	0.2	2	-1.11029	2.99966	1
2	2	-0.1	1	3	0.3	2	-1.36215	2.69975	1
2	2	-0.1	1	3	0.4	2	-1.36215	2.49972	1
2	2	-0.1	1	3	0.5	2	-1.47511	2.29979	1
2	2	-0.1	2	1	0	2	-1.47511	2.29979	1
2	2	-0.1	2	1	0.1	2	-1.47511	2.29979	1
2	2	-0.1	2	1	0.2	2	-1.47511	2.19979	1
2	2	-0.1	2	1	0.3	2	-2.48879	1.79978	1
2	2	-0.1	2	1	0.4	2	-2.23167	1.69983	1
2	2	-0.1	2	1	0.5	2	-2.23167	1.19988	1
2	2	-0.1	2	2	0	2	-1.36215	2.89968	1
2	2	-0.1	2	2	0.1	2	-1.36215	2.59969	1
2	2	-0.1	2	2	0.2	2	-1.36215	2.49972	1
2	2	-0.1	2	2	0.3	2	-1.36215	2.49972	1
2	2	-0.1	2	2	0.4	2	-1.47511	2.29979	1
2	2	-0.1	2	2	0.5	2	-1.47511	2.29979	1
2	2	-0.1	2	3	0	2	-0.361921	3.79958	1
2	2	-0.1	2	3	0.1	2	-0.796266	3.59959	1
2	2	-0.1	2	3	0.2	2	-1.11029	3.19965	1
2	2	-0.1	2	3	0.3	2	-1.36215	2.7997	1
2	2	-0.1	2	3	0.4	2	-1.36215	2.59969	1
2	2	-0.1	2	3	0.5	2	-1.36215	2.49972	1
2	2	-0.1	3	1	0	2	-1.47511	2.39974	1
2	2	-0.1	3	1	0.1	2	-1.47511	2.29979	1
2	2	-0.1	3	1	0.2	2	-1.47511	2.29979	1
2	2	-0.1	3	1	0.3	2	-2.48879	1.89979	1
2	2	-0.1	3	1	0.4	2	-2.48879	1.79978	1
2	2	-0.1	3	1	0.5	2	-2.23167	1.69983	1
2	2	-0.1	3	2	0	2	-1.11029	3.19965	1
2	2	-0.1	3	2	0.1	2	-1.36215	2.7997	1
2	2	-0.1	3	2	0.2	2	-1.36215	2.59969	1
2	2	-0.1	3	2	0.3	2	-1.36215	2.49972	1
2	2	-0.1	3	2	0.4	2	-1.47511	2.29979	1
2	2	-0.1	3	2	0.5	2	-1.47511	2.29979	1
[truncated: 438 more rows]

## Sheet: Flight 3
FLIGHT Nr.	Encounter	Braking time shift [s]	Position sigma multiplier	Velocity sigma multiplier	THS	FF case (0) / EE case (1) / FE case (2)	Distance with the considered braking [m]	DNT (maxT) [s]	Safe (0), Danger (1)
3	1	-0.2	1	1	0	0	0	0	0
3	1	-0.2	1	1	0.1	0	0	0	0
3	1	-0.2	1	1	0.2	0	0	0	0
3	1	-0.2	1	1	0.3	0	0	0	0
3	1	-0.2	1	1	0.4	0	0	0	0
3	1	-0.2	1	1	0.5	0	0	0	0
3	1	-0.2	1	2	0	0	0	0	0
3	1	-0.2	1	2	0.1	0	0	0	0
3	1	-0.2	1	2	0.2	0	0	0	0
3	1	-0.2	1	2	0.3	0	0	0	0
3	1	-0.2	1	2	0.4	0	0	0	0
3	1	-0.2	1	2	0.5	0	0	0	0
3	1	-0.2	1	3	0	0	0	0	0
3	1	-0.2	1	3	0.1	0	0	0	0
3	1	-0.2	1	3	0.2	0	0	0	0
3	1	-0.2	1	3	0.3	0	0	0	0
3	1	-0.2	1	3	0.4	0	0	0	0
3	1	-0.2	1	3	0.5	0	0	0	0
3	1	-0.2	2	1	0	0	0	0	0
3	1	-0.2	2	1	0.1	0	0	0	0
3	1	-0.2	2	1	0.2	0	0	0	0
3	1	-0.2	2	1	0.3	0	0	0	0
3	1	-0.2	2	1	0.4	0	0	0	0
3	1	-0.2	2	1	0.5	0	0	0	0
3	1	-0.2	2	2	0	0	0	0	0
3	1	-0.2	2	2	0.1	0	0	0	0
3	1	-0.2	2	2	0.2	0	0	0	0
3	1	-0.2	2	2	0.3	0	0	0	0
3	1	-0.2	2	2	0.4	0	0	0	0
3	1	-0.2	2	2	0.5	0	0	0	0
3	1	-0.2	2	3	0	0	0	0	0
3	1	-0.2	2	3	0.1	0	0	0	0
3	1	-0.2	2	3	0.2	0	0	0	0
3	1	-0.2	2	3	0.3	0	0	0	0
3	1	-0.2	2	3	0.4	0	0	0	0
3	1	-0.2	2	3	0.5	0	0	0	0
3	1	-0.2	3	1	0	0	0	0	0
3	1	-0.2	3	1	0.1	0	0	0	0
3	1	-0.2	3	1	0.2	0	0	0	0
3	1	-0.2	3	1	0.3	0	0	0	0
3	1	-0.2	3	1	0.4	0	0	0	0
3	1	-0.2	3	1	0.5	0	0	0	0
3	1	-0.2	3	2	0	0	0	0	0
3	1	-0.2	3	2	0.1	0	0	0	0
3	1	-0.2	3	2	0.2	0	0	0	0
3	1	-0.2	3	2	0.3	0	0	0	0
3	1	-0.2	3	2	0.4	0	0	0	0
3	1	-0.2	3	2	0.5	0	0	0	0
3	1	-0.2	3	3	0	0	0	0	0
3	1	-0.2	3	3	0.1	0	0	0	0
3	1	-0.2	3	3	0.2	0	0	0	0
3	1	-0.2	3	3	0.3	0	0	0	0
3	1	-0.2	3	3	0.4	0	0	0	0
3	1	-0.2	3	3	0.5	0	0	0	0
3	1	-0.1	1	1	0	0	0	0	0
3	1	-0.1	1	1	0.1	0	0	0	0
3	1	-0.1	1	1	0.2	0	0	0	0
3	1	-0.1	1	1	0.3	0	0	0	0
3	1	-0.1	1	1	0.4	0	0	0	0
3	1	-0.1	1	1	0.5	0	0	0	0
3	1	-0.1	1	2	0	0	0	0	0
3	1	-0.1	1	2	0.1	0	0	0	0
3	1	-0.1	1	2	0.2	0	0	0	0
3	1	-0.1	1	2	0.3	0	0	0	0
3	1	-0.1	1	2	0.4	0	0	0	0
3	1	-0.1	1	2	0.5	0	0	0	0
3	1	-0.1	1	3	0	0	0	0	0
3	1	-0.1	1	3	0.1	0	0	0	0
3	1	-0.1	1	3	0.2	0	0	0	0
3	1	-0.1	1	3	0.3	0	0	0	0
3	1	-0.1	1	3	0.4	0	0	0	0
3	1	-0.1	1	3	0.5	0	0	0	0
3	1	-0.1	2	1	0	0	0	0	0
3	1	-0.1	2	1	0.1	0	0	0	0
3	1	-0.1	2	1	0.2	0	0	0	0
3	1	-0.1	2	1	0.3	0	0	0	0
3	1	-0.1	2	1	0.4	0	0	0	0
3	1	-0.1	2	1	0.5	0	0	0	0
3	1	-0.1	2	2	0	0	0	0	0
3	1	-0.1	2	2	0.1	0	0	0	0
3	1	-0.1	2	2	0.2	0	0	0	0
3	1	-0.1	2	2	0.3	0	0	0	0
3	1	-0.1	2	2	0.4	0	0	0	0
3	1	-0.1	2	2	0.5	0	0	0	0
3	1	-0.1	2	3	0	0	0	0	0
3	1	-0.1	2	3	0.1	0	0	0	0
3	1	-0.1	2	3	0.2	0	0	0	0
3	1	-0.1	2	3	0.3	0	0	0	0
3	1	-0.1	2	3	0.4	0	0	0	0
3	1	-0.1	2	3	0.5	0	0	0	0
3	1	-0.1	3	1	0	0	0	0	0
3	1	-0.1	3	1	0.1	0	0	0	0
3	1	-0.1	3	1	0.2	0	0	0	0
3	1	-0.1	3	1	0.3	0	0	0	0
3	1	-0.1	3	1	0.4	0	0	0	0
3	1	-0.1	3	1	0.5	0	0	0	0
3	1	-0.1	3	2	0	0	0	0	0
3	1	-0.1	3	2	0.1	0	0	0	0
3	1	-0.1	3	2	0.2	0	0	0	0
3	1	-0.1	3	2	0.3	0	0	0	0
3	1	-0.1	3	2	0.4	0	0	0	0
3	1	-0.1	3	2	0.5	0	0	0	0
3	1	-0.1	3	3	0	0	0	0	0
3	1	-0.1	3	3	0.1	0	0	0	0
3	1	-0.1	3	3	0.2	0	0	0	0
3	1	-0.1	3	3	0.3	0	0	0	0
3	1	-0.1	3	3	0.4	0	0	0	0
3	1	-0.1	3	3	0.5	0	0	0	0
3	1	0	1	1	0	0	0	0	0
3	1	0	1	1	0.1	0	0	0	0
3	1	0	1	1	0.2	0	0	0	0
3	1	0	1	1	0.3	0	0	0	0
3	1	0	1	1	0.4	0	0	0	0
3	1	0	1	1	0.5	0	0	0	0
3	1	0	1	2	0	0	0	0	0
3	1	0	1	2	0.1	0	0	0	0
3	1	0	1	2	0.2	0	0	0	0
3	1	0	1	2	0.3	0	0	0	0
3	1	0	1	2	0.4	0	0	0	0
3	1	0	1	2	0.5	0	0	0	0
3	1	0	1	3	0	0	0	0	0
3	1	0	1	3	0.1	0	0	0	0
3	1	0	1	3	0.2	0	0	0	0
3	1	0	1	3	0.3	0	0	0	0
3	1	0	1	3	0.4	0	0	0	0
3	1	0	1	3	0.5	0	0	0	0
3	1	0	2	1	0	0	0	0	0
3	1	0	2	1	0.1	0	0	0	0
3	1	0	2	1	0.2	0	0	0	0
3	1	0	2	1	0.3	0	0	0	0
3	1	0	2	1	0.4	0	0	0	0
3	1	0	2	1	0.5	0	0	0	0
3	1	0	2	2	0	0	0	0	0
3	1	0	2	2	0.1	0	0	0	0
3	1	0	2	2	0.2	0	0	0	0
3	1	0	2	2	0.3	0	0	0	0
3	1	0	2	2	0.4	0	0	0	0
3	1	0	2	2	0.5	0	0	0	0
3	1	0	2	3	0	0	0	0	0
3	1	0	2	3	0.1	0	0	0	0
3	1	0	2	3	0.2	0	0	0	0
3	1	0	2	3	0.3	0	0	0	0
3	1	0	2	3	0.4	0	0	0	0
3	1	0	2	3	0.5	0	0	0	0
3	1	0	3	1	0	0	0	0	0
3	1	0	3	1	0.1	0	0	0	0
3	1	0	3	1	0.2	0	0	0	0
3	1	0	3	1	0.3	0	0	0	0
3	1	0	3	1	0.4	0	0	0	0
3	1	0	3	1	0.5	0	0	0	0
3	1	0	3	2	0	0	0	0	0
3	1	0	3	2	0.1	0	0	0	0
3	1	0	3	2	0.2	0	0	0	0
3	1	0	3	2	0.3	0	0	0	0
3	1	0	3	2	0.4	0	0	0	0
3	1	0	3	2	0.5	0	0	0	0
3	1	0	3	3	0	0	-4.31693	1.19992	1
3	1	0	3	3	0.1	0	0	0	0
3	1	0	3	3	0.2	0	0	0	0
3	1	0	3	3	0.3	0	0	0	0
3	1	0	3	3	0.4	0	0	0	0
3	1	0	3	3	0.5	0	0	0	0
3	1	0.1	1	1	0	0	0	0	0
3	1	0.1	1	1	0.1	0	0	0	0
3	1	0.1	1	1	0.2	0	0	0	0
3	1	0.1	1	1	0.3	0	0	0	0
3	1	0.1	1	1	0.4	0	0	0	0
3	1	0.1	1	1	0.5	0	0	0	0
3	1	0.1	1	2	0	0	0	0	0
3	1	0.1	1	2	0.1	0	0	0	0
3	1	0.1	1	2	0.2	0	0	0	0
3	1	0.1	1	2	0.3	0	0	0	0
3	1	0.1	1	2	0.4	0	0	0	0
3	1	0.1	1	2	0.5	0	0	0	0
3	1	0.1	1	3	0	0	0	0	0
3	1	0.1	1	3	0.1	0	0	0	0
3	1	0.1	1	3	0.2	0	0	0	0
3	1	0.1	1	3	0.3	0	0	0	0
3	1	0.1	1	3	0.4	0	0	0	0
3	1	0.1	1	3	0.5	0	0	0	0
3	1	0.1	2	1	0	0	0	0	0
3	1	0.1	2	1	0.1	0	0	0	0
3	1	0.1	2	1	0.2	0	0	0	0
3	1	0.1	2	1	0.3	0	0	0	0
3	1	0.1	2	1	0.4	0	0	0	0
3	1	0.1	2	1	0.5	0	0	0	0
3	1	0.1	2	2	0	0	0	0	0
3	1	0.1	2	2	0.1	0	0	0	0
3	1	0.1	2	2	0.2	0	0	0	0
3	1	0.1	2	2	0.3	0	0	0	0
3	1	0.1	2	2	0.4	0	0	0	0
3	1	0.1	2	2	0.5	0	0	0	0
3	1	0.1	2	3	0	0	-3.4589	1.99987	1
3	1	0.1	2	3	0.1	0	0	0	0
3	1	0.1	2	3	0.2	0	0	0	0
3	1	0.1	2	3	0.3	0	0	0	0
3	1	0.1	2	3	0.4	0	0	0	0
3	1	0.1	2	3	0.5	0	0	0	0
3	1	0.1	3	1	0	0	0	0	0
3	1	0.1	3	1	0.1	0	0	0	0
3	1	0.1	3	1	0.2	0	0	0	0
3	1	0.1	3	1	0.3	0	0	0	0
3	1	0.1	3	1	0.4	0	0	0	0
3	1	0.1	3	1	0.5	0	0	0	0
3	1	0.1	3	2	0	0	0	0	0
3	1	0.1	3	2	0.1	0	0	0	0
3	1	0.1	3	2	0.2	0	0	0	0
3	1	0.1	3	2	0.3	0	0	0	0
3	1	0.1	3	2	0.4	0	0	0	0
3	1	0.1	3	2	0.5	0	0	0	0
3	1	0.1	3	3	0	0	-3.4589	2.09987	1
3	1	0.1	3	3	0.1	0	0	0	0
3	1	0.1	3	3	0.2	0	0	0	0
3	1	0.1	3	3	0.3	0	0	0	0
3	1	0.1	3	3	0.4	0	0	0	0
3	1	0.1	3	3	0.5	0	0	0	0
3	1	0.2	1	1	0	0	0	0	0
3	1	0.2	1	1	0.1	0	0	0	0
3	1	0.2	1	1	0.2	0	0	0	0
3	1	0.2	1	1	0.3	0	0	0	0
3	1	0.2	1	1	0.4	0	0	0	0
3	1	0.2	1	1	0.5	0	0	0	0
3	1	0.2	1	2	0	0	0	0	0
3	1	0.2	1	2	0.1	0	0	0	0
3	1	0.2	1	2	0.2	0	0	0	0
3	1	0.2	1	2	0.3	0	0	0	0
3	1	0.2	1	2	0.4	0	0	0	0
3	1	0.2	1	2	0.5	0	0	0	0
3	1	0.2	1	3	0	0	-3.4589	1.99987	1
3	1	0.2	1	3	0.1	0	0	0	0
3	1	0.2	1	3	0.2	0	0	0	0
3	1	0.2	1	3	0.3	0	0	0	0
3	1	0.2	1	3	0.4	0	0	0	0
3	1	0.2	1	3	0.5	0	0	0	0
3	1	0.2	2	1	0	0	0	0	0
3	1	0.2	2	1	0.1	0	0	0	0
3	1	0.2	2	1	0.2	0	0	0	0
3	1	0.2	2	1	0.3	0	0	0	0
3	1	0.2	2	1	0.4	0	0	0	0
3	1	0.2	2	1	0.5	0	0	0	0
3	1	0.2	2	2	0	0	0	0	0
3	1	0.2	2	2	0.1	0	0	0	0
3	1	0.2	2	2	0.2	0	0	0	0
3	1	0.2	2	2	0.3	0	0	0	0
3	1	0.2	2	2	0.4	0	0	0	0
3	1	0.2	2	2	0.5	0	0	0	0
3	1	0.2	2	3	0	0	-3.22026	2.39988	1
3	1	0.2	2	3	0.1	0	-4.31693	1.19992	1
3	1	0.2	2	3	0.2	0	0	0	0
3	1	0.2	2	3	0.3	0	0	0	0
3	1	0.2	2	3	0.4	0	0	0	0
3	1	0.2	2	3	0.5	0	0	0	0
3	1	0.2	3	1	0	0	0	0	0
3	1	0.2	3	1	0.1	0	0	0	0
3	1	0.2	3	1	0.2	0	0	0	0
3	1	0.2	3	1	0.3	0	0	0	0
3	1	0.2	3	1	0.4	0	0	0	0
3	1	0.2	3	1	0.5	0	0	0	0
3	1	0.2	3	2	0	0	0	0	0
3	1	0.2	3	2	0.1	0	0	0	0
3	1	0.2	3	2	0.2	0	0	0	0
3	1	0.2	3	2	0.3	0	0	0	0
3	1	0.2	3	2	0.4	0	0	0	0
3	1	0.2	3	2	0.5	0	0	0	0
3	1	0.2	3	3	0	0	-2.70331	2.59981	1
3	1	0.2	3	3	0.1	0	-3.4589	1.99987	1
3	1	0.2	3	3	0.2	0	0	0	0
3	1	0.2	3	3	0.3	0	0	0	0
3	1	0.2	3	3	0.4	0	0	0	0
3	1	0.2	3	3	0.5	0	0	0	0
3	1	-0.2	1	1	0	1	0	0	0
3	1	-0.2	1	1	0.1	1	0	0	0
3	1	-0.2	1	1	0.2	1	0	0	0
3	1	-0.2	1	1	0.3	1	0	0	0
3	1	-0.2	1	1	0.4	1	0	0	0
3	1	-0.2	1	1	0.5	1	0	0	0
3	1	-0.2	1	2	0	1	0	0	0
3	1	-0.2	1	2	0.1	1	0	0	0
3	1	-0.2	1	2	0.2	1	0	0	0
3	1	-0.2	1	2	0.3	1	0	0	0
3	1	-0.2	1	2	0.4	1	0	0	0
3	1	-0.2	1	2	0.5	1	0	0	0
3	1	-0.2	1	3	0	1	0	0	0
3	1	-0.2	1	3	0.1	1	0	0	0
3	1	-0.2	1	3	0.2	1	0	0	0
3	1	-0.2	1	3	0.3	1	0	0	0
3	1	-0.2	1	3	0.4	1	0	0	0
3	1	-0.2	1	3	0.5	1	0	0	0
3	1	-0.2	2	1	0	1	0	0	0
3	1	-0.2	2	1	0.1	1	0	0	0
3	1	-0.2	2	1	0.2	1	0	0	0
3	1	-0.2	2	1	0.3	1	0	0	0
3	1	-0.2	2	1	0.4	1	0	0	0
3	1	-0.2	2	1	0.5	1	0	0	0
3	1	-0.2	2	2	0	1	0	0	0
3	1	-0.2	2	2	0.1	1	0	0	0
3	1	-0.2	2	2	0.2	1	0	0	0
3	1	-0.2	2	2	0.3	1	0	0	0
3	1	-0.2	2	2	0.4	1	0	0	0
3	1	-0.2	2	2	0.5	1	0	0	0
3	1	-0.2	2	3	0	1	0	0	0
3	1	-0.2	2	3	0.1	1	0	0	0
3	1	-0.2	2	3	0.2	1	0	0	0
3	1	-0.2	2	3	0.3	1	0	0	0
3	1	-0.2	2	3	0.4	1	0	0	0
3	1	-0.2	2	3	0.5	1	0	0	0
3	1	-0.2	3	1	0	1	0	0	0
3	1	-0.2	3	1	0.1	1	0	0	0
3	1	-0.2	3	1	0.2	1	0	0	0
3	1	-0.2	3	1	0.3	1	0	0	0
3	1	-0.2	3	1	0.4	1	0	0	0
3	1	-0.2	3	1	0.5	1	0	0	0
3	1	-0.2	3	2	0	1	0	0	0
3	1	-0.2	3	2	0.1	1	0	0	0
3	1	-0.2	3	2	0.2	1	0	0	0
3	1	-0.2	3	2	0.3	1	0	0	0
3	1	-0.2	3	2	0.4	1	0	0	0
3	1	-0.2	3	2	0.5	1	0	0	0
3	1	-0.2	3	3	0	1	0	0	0
3	1	-0.2	3	3	0.1	1	0	0	0
3	1	-0.2	3	3	0.2	1	0	0	0
3	1	-0.2	3	3	0.3	1	0	0	0
3	1	-0.2	3	3	0.4	1	0	0	0
3	1	-0.2	3	3	0.5	1	0	0	0
3	1	-0.1	1	1	0	1	0	0	0
3	1	-0.1	1	1	0.1	1	0	0	0
3	1	-0.1	1	1	0.2	1	0	0	0
3	1	-0.1	1	1	0.3	1	0	0	0
3	1	-0.1	1	1	0.4	1	0	0	0
3	1	-0.1	1	1	0.5	1	0	0	0
3	1	-0.1	1	2	0	1	0	0	0
3	1	-0.1	1	2	0.1	1	0	0	0
3	1	-0.1	1	2	0.2	1	0	0	0
3	1	-0.1	1	2	0.3	1	0	0	0
3	1	-0.1	1	2	0.4	1	0	0	0
3	1	-0.1	1	2	0.5	1	0	0	0
3	1	-0.1	1	3	0	1	0	0	0
3	1	-0.1	1	3	0.1	1	0	0	0
3	1	-0.1	1	3	0.2	1	0	0	0
3	1	-0.1	1	3	0.3	1	0	0	0
3	1	-0.1	1	3	0.4	1	0	0	0
3	1	-0.1	1	3	0.5	1	0	0	0
3	1	-0.1	2	1	0	1	0	0	0
3	1	-0.1	2	1	0.1	1	0	0	0
3	1	-0.1	2	1	0.2	1	0	0	0
3	1	-0.1	2	1	0.3	1	0	0	0
3	1	-0.1	2	1	0.4	1	0	0	0
3	1	-0.1	2	1	0.5	1	0	0	0
3	1	-0.1	2	2	0	1	0	0	0
3	1	-0.1	2	2	0.1	1	0	0	0
3	1	-0.1	2	2	0.2	1	0	0	0
3	1	-0.1	2	2	0.3	1	0	0	0
3	1	-0.1	2	2	0.4	1	0	0	0
3	1	-0.1	2	2	0.5	1	0	0	0
3	1	-0.1	2	3	0	1	0	0	0
3	1	-0.1	2	3	0.1	1	0	0	0
3	1	-0.1	2	3	0.2	1	0	0	0
3	1	-0.1	2	3	0.3	1	0	0	0
3	1	-0.1	2	3	0.4	1	0	0	0
3	1	-0.1	2	3	0.5	1	0	0	0
3	1	-0.1	3	1	0	1	0	0	0
3	1	-0.1	3	1	0.1	1	0	0	0
3	1	-0.1	3	1	0.2	1	0	0	0
3	1	-0.1	3	1	0.3	1	0	0	0
3	1	-0.1	3	1	0.4	1	0	0	0
3	1	-0.1	3	1	0.5	1	0	0	0
3	1	-0.1	3	2	0	1	0	0	0
3	1	-0.1	3	2	0.1	1	0	0	0
3	1	-0.1	3	2	0.2	1	0	0	0
3	1	-0.1	3	2	0.3	1	0	0	0
3	1	-0.1	3	2	0.4	1	0	0	0
3	1	-0.1	3	2	0.5	1	0	0	0
3	1	-0.1	3	3	0	1	0	0	0
3	1	-0.1	3	3	0.1	1	0	0	0
3	1	-0.1	3	3	0.2	1	0	0	0
3	1	-0.1	3	3	0.3	1	0	0	0
3	1	-0.1	3	3	0.4	1	0	0	0
3	1	-0.1	3	3	0.5	1	0	0	0
3	1	0	1	1	0	1	0	0	0
3	1	0	1	1	0.1	1	0	0	0
3	1	0	1	1	0.2	1	0	0	0
3	1	0	1	1	0.3	1	0	0	0
3	1	0	1	1	0.4	1	0	0	0
3	1	0	1	1	0.5	1	0	0	0
3	1	0	1	2	0	1	0	0	0
3	1	0	1	2	0.1	1	0	0	0
3	1	0	1	2	0.2	1	0	0	0
3	1	0	1	2	0.3	1	0	0	0
3	1	0	1	2	0.4	1	0	0	0
3	1	0	1	2	0.5	1	0	0	0
3	1	0	1	3	0	1	0	0	0
3	1	0	1	3	0.1	1	0	0	0
3	1	0	1	3	0.2	1	0	0	0
3	1	0	1	3	0.3	1	0	0	0
3	1	0	1	3	0.4	1	0	0	0
3	1	0	1	3	0.5	1	0	0	0
3	1	0	2	1	0	1	0	0	0
3	1	0	2	1	0.1	1	0	0	0
3	1	0	2	1	0.2	1	0	0	0
3	1	0	2	1	0.3	1	0	0	0
3	1	0	2	1	0.4	1	0	0	0
3	1	0	2	1	0.5	1	0	0	0
3	1	0	2	2	0	1	0	0	0
3	1	0	2	2	0.1	1	0	0	0
3	1	0	2	2	0.2	1	0	0	0
3	1	0	2	2	0.3	1	0	0	0
3	1	0	2	2	0.4	1	0	0	0
3	1	0	2	2	0.5	1	0	0	0
3	1	0	2	3	0	1	0	0	0
3	1	0	2	3	0.1	1	0	0	0
3	1	0	2	3	0.2	1	0	0	0
3	1	0	2	3	0.3	1	0	0	0
3	1	0	2	3	0.4	1	0	0	0
3	1	0	2	3	0.5	1	0	0	0
3	1	0	3	1	0	1	0	0	0
3	1	0	3	1	0.1	1	0	0	0
3	1	0	3	1	0.2	1	0	0	0
3	1	0	3	1	0.3	1	0	0	0
3	1	0	3	1	0.4	1	0	0	0
3	1	0	3	1	0.5	1	0	0	0
3	1	0	3	2	0	1	0	0	0
3	1	0	3	2	0.1	1	0	0	0
3	1	0	3	2	0.2	1	0	0	0
3	1	0	3	2	0.3	1	0	0	0
3	1	0	3	2	0.4	1	0	0	0
3	1	0	3	2	0.5	1	0	0	0
3	1	0	3	3	0	1	0	0	0
3	1	0	3	3	0.1	1	0	0	0
3	1	0	3	3	0.2	1	0	0	0
3	1	0	3	3	0.3	1	0	0	0
3	1	0	3	3	0.4	1	0	0	0
3	1	0	3	3	0.5	1	0	0	0
3	1	0.1	1	1	0	1	0	0	0
3	1	0.1	1	1	0.1	1	0	0	0
3	1	0.1	1	1	0.2	1	0	0	0
3	1	0.1	1	1	0.3	1	0	0	0
3	1	0.1	1	1	0.4	1	0	0	0
3	1	0.1	1	1	0.5	1	0	0	0
3	1	0.1	1	2	0	1	0	0	0
3	1	0.1	1	2	0.1	1	0	0	0
3	1	0.1	1	2	0.2	1	0	0	0
3	1	0.1	1	2	0.3	1	0	0	0
3	1	0.1	1	2	0.4	1	0	0	0
3	1	0.1	1	2	0.5	1	0	0	0
3	1	0.1	1	3	0	1	0	0	0
3	1	0.1	1	3	0.1	1	0	0	0
3	1	0.1	1	3	0.2	1	0	0	0
3	1	0.1	1	3	0.3	1	0	0	0
3	1	0.1	1	3	0.4	1	0	0	0
3	1	0.1	1	3	0.5	1	0	0	0
3	1	0.1	2	1	0	1	0	0	0
3	1	0.1	2	1	0.1	1	0	0	0
3	1	0.1	2	1	0.2	1	0	0	0
3	1	0.1	2	1	0.3	1	0	0	0
3	1	0.1	2	1	0.4	1	0	0	0
3	1	0.1	2	1	0.5	1	0	0	0
3	1	0.1	2	2	0	1	0	0	0
3	1	0.1	2	2	0.1	1	0	0	0
3	1	0.1	2	2	0.2	1	0	0	0
3	1	0.1	2	2	0.3	1	0	0	0
3	1	0.1	2	2	0.4	1	0	0	0
3	1	0.1	2	2	0.5	1	0	0	0
3	1	0.1	2	3	0	1	0	0	0
3	1	0.1	2	3	0.1	1	0	0	0
3	1	0.1	2	3	0.2	1	0	0	0
3	1	0.1	2	3	0.3	1	0	0	0
3	1	0.1	2	3	0.4	1	0	0	0
3	1	0.1	2	3	0.5	1	0	0	0
3	1	0.1	3	1	0	1	0	0	0
3	1	0.1	3	1	0.1	1	0	0	0
3	1	0.1	3	1	0.2	1	0	0	0
3	1	0.1	3	1	0.3	1	0	0	0
3	1	0.1	3	1	0.4	1	0	0	0
3	1	0.1	3	1	0.5	1	0	0	0
3	1	0.1	3	2	0	1	0	0	0
3	1	0.1	3	2	0.1	1	0	0	0
3	1	0.1	3	2	0.2	1	0	0	0
3	1	0.1	3	2	0.3	1	0	0	0
3	1	0.1	3	2	0.4	1	0	0	0
3	1	0.1	3	2	0.5	1	0	0	0
3	1	0.1	3	3	0	1	0	0	0
3	1	0.1	3	3	0.1	1	0	0	0
3	1	0.1	3	3	0.2	1	0	0	0
3	1	0.1	3	3	0.3	1	0	0	0
3	1	0.1	3	3	0.4	1	0	0	0
3	1	0.1	3	3	0.5	1	0	0	0
3	1	0.2	1	1	0	1	0	0	0
3	1	0.2	1	1	0.1	1	0	0	0
3	1	0.2	1	1	0.2	1	0	0	0
3	1	0.2	1	1	0.3	1	0	0	0
3	1	0.2	1	1	0.4	1	0	0	0
3	1	0.2	1	1	0.5	1	0	0	0
3	1	0.2	1	2	0	1	0	0	0
3	1	0.2	1	2	0.1	1	0	0	0
3	1	0.2	1	2	0.2	1	0	0	0
3	1	0.2	1	2	0.3	1	0	0	0
3	1	0.2	1	2	0.4	1	0	0	0
3	1	0.2	1	2	0.5	1	0	0	0
3	1	0.2	1	3	0	1	0	0	0
3	1	0.2	1	3	0.1	1	0	0	0
3	1	0.2	1	3	0.2	1	0	0	0
3	1	0.2	1	3	0.3	1	0	0	0
3	1	0.2	1	3	0.4	1	0	0	0
3	1	0.2	1	3	0.5	1	0	0	0
3	1	0.2	2	1	0	1	0	0	0
3	1	0.2	2	1	0.1	1	0	0	0
3	1	0.2	2	1	0.2	1	0	0	0
3	1	0.2	2	1	0.3	1	0	0	0
3	1	0.2	2	1	0.4	1	0	0	0
3	1	0.2	2	1	0.5	1	0	0	0
3	1	0.2	2	2	0	1	0	0	0
3	1	0.2	2	2	0.1	1	0	0	0
3	1	0.2	2	2	0.2	1	0	0	0
3	1	0.2	2	2	0.3	1	0	0	0
3	1	0.2	2	2	0.4	1	0	0	0
3	1	0.2	2	2	0.5	1	0	0	0
3	1	0.2	2	3	0	1	0	0	0
3	1	0.2	2	3	0.1	1	0	0	0
3	1	0.2	2	3	0.2	1	0	0	0
3	1	0.2	2	3	0.3	1	0	0	0
3	1	0.2	2	3	0.4	1	0	0	0
3	1	0.2	2	3	0.5	1	0	0	0
3	1	0.2	3	1	0	1	0	0	0
3	1	0.2	3	1	0.1	1	0	0	0
3	1	0.2	3	1	0.2	1	0	0	0
3	1	0.2	3	1	0.3	1	0	0	0
3	1	0.2	3	1	0.4	1	0	0	0
3	1	0.2	3	1	0.5	1	0	0	0
3	1	0.2	3	2	0	1	0	0	0
3	1	0.2	3	2	0.1	1	0	0	0
3	1	0.2	3	2	0.2	1	0	0	0
3	1	0.2	3	2	0.3	1	0	0	0
3	1	0.2	3	2	0.4	1	0	0	0
3	1	0.2	3	2	0.5	1	0	0	0
3	1	0.2	3	3	0	1	0	0	0
3	1	0.2	3	3	0.1	1	0	0	0
3	1	0.2	3	3	0.2	1	0	0	0
3	1	0.2	3	3	0.3	1	0	0	0
3	1	0.2	3	3	0.4	1	0	0	0
3	1	0.2	3	3	0.5	1	0	0	0
3	2	-0.2	1	1	0	0	0	0	0
3	2	-0.2	1	1	0.1	0	0	0	0
3	2	-0.2	1	1	0.2	0	0	0	0
3	2	-0.2	1	1	0.3	0	0	0	0
3	2	-0.2	1	1	0.4	0	0	0	0
3	2	-0.2	1	1	0.5	0	0	0	0
3	2	-0.2	1	2	0	0	-2.44211	1.99989	1
3	2	-0.2	1	2	0.1	0	-1.39736	1.29993	1
3	2	-0.2	1	2	0.2	0	0	0	0
3	2	-0.2	1	2	0.3	0	0	0	0
3	2	-0.2	1	2	0.4	0	0	0	0
3	2	-0.2	1	2	0.5	0	0	0	0
3	2	-0.2	1	3	0	0	-2.69659	2.99983	1
3	2	-0.2	1	3	0.1	0	-2.77627	2.59987	1
3	2	-0.2	1	3	0.2	0	-2.60844	2.29989	1
3	2	-0.2	1	3	0.3	0	-2.44211	1.99989	1
3	2	-0.2	1	3	0.4	0	0	0	0
3	2	-0.2	1	3	0.5	0	0	0	0
3	2	-0.2	2	1	0	0	0	0	0
3	2	-0.2	2	1	0.1	0	0	0	0
3	2	-0.2	2	1	0.2	0	0	0	0
3	2	-0.2	2	1	0.3	0	0	0	0
3	2	-0.2	2	1	0.4	0	0	0	0
3	2	-0.2	2	1	0.5	0	0	0	0
3	2	-0.2	2	2	0	0	-2.60844	2.19987	1
3	2	-0.2	2	2	0.1	0	-2.44211	2.09988	1
3	2	-0.2	2	2	0.2	0	-1.39736	1.29993	1
3	2	-0.2	2	2	0.3	0	0	0	0
3	2	-0.2	2	2	0.4	0	0	0	0
3	2	-0.2	2	2	0.5	0	0	0	0
3	2	-0.2	2	3	0	0	-0.936058	3.99974	1
3	2	-0.2	2	3	0.1	0	-2.69659	2.99983	1
3	2	-0.2	2	3	0.2	0	-2.77627	2.59987	1
3	2	-0.2	2	3	0.3	0	-2.60844	2.19987	1
3	2	-0.2	2	3	0.4	0	-1.39736	1.29993	1
3	2	-0.2	2	3	0.5	0	0	0	0
3	2	-0.2	3	1	0	0	0	0	0
3	2	-0.2	3	1	0.1	0	0	0	0
3	2	-0.2	3	1	0.2	0	0	0	0
3	2	-0.2	3	1	0.3	0	0	0	0
3	2	-0.2	3	1	0.4	0	0	0	0
3	2	-0.2	3	1	0.5	0	0	0	0
3	2	-0.2	3	2	0	0	-2.60844	2.29989	1
3	2	-0.2	3	2	0.1	0	-2.60844	2.19987	1
3	2	-0.2	3	2	0.2	0	-1.39736	1.39993	1
3	2	-0.2	3	2	0.3	0	-1.39736	1.29993	1
3	2	-0.2	3	2	0.4	0	0	0	0
3	2	-0.2	3	2	0.5	0	0	0	0
3	2	-0.2	3	3	0	0	-0.633647	4.09969	1
3	2	-0.2	3	3	0.1	0	-2.59631	3.19724	1
3	2	-0.2	3	3	0.2	0	-2.77627	2.79985	1
3	2	-0.2	3	3	0.3	0	-2.60844	2.29989	1
3	2	-0.2	3	3	0.4	0	-2.44211	2.09988	1
3	2	-0.2	3	3	0.5	0	0	0	0
3	2	-0.1	1	1	0	0	0	0	0
3	2	-0.1	1	1	0.1	0	0	0	0
3	2	-0.1	1	1	0.2	0	0	0	0
3	2	-0.1	1	1	0.3	0	0	0	0
3	2	-0.1	1	1	0.4	0	0	0	0
3	2	-0.1	1	1	0.5	0	0	0	0
3	2	-0.1	1	2	0	0	-2.60844	2.19987	1
3	2	-0.1	1	2	0.1	0	-2.60844	1.99988	1
3	2	-0.1	1	2	0.2	0	-1.39736	1.29993	1
3	2	-0.1	1	2	0.3	0	0	0	0
3	2	-0.1	1	2	0.4	0	0	0	0
3	2	-0.1	1	2	0.5	0	0	0	0
3	2	-0.1	1	3	0	0	-0.633647	3.99971	1
3	2	-0.1	1	3	0.1	0	-2.69659	2.99983	1
3	2	-0.1	1	3	0.2	0	-2.77627	2.59987	1
3	2	-0.1	1	3	0.3	0	-2.60844	2.19987	1
3	2	-0.1	1	3	0.4	0	-2.44211	1.89989	1
3	2	-0.1	1	3	0.5	0	0	0	0
3	2	-0.1	2	1	0	0	0	0	0
3	2	-0.1	2	1	0.1	0	0	0	0
3	2	-0.1	2	1	0.2	0	0	0	0
3	2	-0.1	2	1	0.3	0	0	0	0
3	2	-0.1	2	1	0.4	0	0	0	0
3	2	-0.1	2	1	0.5	0	0	0	0
3	2	-0.1	2	2	0	0	-2.77627	2.59987	1
3	2	-0.1	2	2	0.1	0	-2.60844	2.19987	1
3	2	-0.1	2	2	0.2	0	-2.44211	1.89989	1
3	2	-0.1	2	2	0.3	0	-1.39736	0.99993	1
3	2	-0.1	2	2	0.4	0	0	0	0
3	2	-0.1	2	2	0.5	0	0	0	0
3	2	-0.1	2	3	0	0	-0.15028	4.19972	1
3	2	-0.1	2	3	0.1	0	-0.936058	3.89976	1
3	2	-0.1	2	3	0.2	0	-2.69659	2.79985	1
3	2	-0.1	2	3	0.3	0	-2.77627	2.49985	1
3	2	-0.1	2	3	0.4	0	-2.60844	2.09988	1
3	2	-0.1	2	3	0.5	0	-1.39736	0.99993	1
3	2	-0.1	3	1	0	0	-1.39736	1.29993	1
3	2	-0.1	3	1	0.1	0	0	0	0
3	2	-0.1	3	1	0.2	0	0	0	0
3	2	-0.1	3	1	0.3	0	0	0	0
3	2	-0.1	3	1	0.4	0	0	0	0
3	2	-0.1	3	1	0.5	0	0	0	0
3	2	-0.1	3	2	0	0	-2.78807	2.69984	1
3	2	-0.1	3	2	0.1	0	-2.77627	2.59987	1
3	2	-0.1	3	2	0.2	0	-2.60844	2.19987	1
3	2	-0.1	3	2	0.3	0	-1.39736	1.29993	1
3	2	-0.1	3	2	0.4	0	-1.39736	0.99993	1
3	2	-0.1	3	2	0.5	0	0	0	0
3	2	-0.1	3	3	0	0	-0.189727	4.39972	1
3	2	-0.1	3	3	0.1	0	-0.633647	4.09969	1
3	2	-0.1	3	3	0.2	0	-2.69659	2.99983	1
3	2	-0.1	3	3	0.3	0	-2.77627	2.59987	1
3	2	-0.1	3	3	0.4	0	-2.60844	2.19987	1
3	2	-0.1	3	3	0.5	0	-1.39736	1.29993	1
3	2	0	1	1	0	0	0	0	0
3	2	0	1	1	0.1	0	0	0	0
3	2	0	1	1	0.2	0	0	0	0
3	2	0	1	1	0.3	0	0	0	0
3	2	0	1	1	0.4	0	0	0	0
3	2	0	1	1	0.5	0	0	0	0
3	2	0	1	2	0	0	-2.77627	2.49985	1
3	2	0	1	2	0.1	0	-2.60844	2.09988	1
3	2	0	1	2	0.2	0	-2.60844	1.99988	1
3	2	0	1	2	0.3	0	-1.39736	0.99993	1
3	2	0	1	2	0.4	0	0	0	0
3	2	0	1	2	0.5	0	0	0	0
3	2	0	1	3	0	0	-0.189727	4.19973	1
3	2	0	1	3	0.1	0	-0.633647	3.89974	1
3	2	0	1	3	0.2	0	-2.69659	2.79985	1
3	2	0	1	3	0.3	0	-2.77627	2.49985	1
3	2	0	1	3	0.4	0	-2.60844	2.09988	1
3	2	0	1	3	0.5	0	-1.39736	0.99993	1
3	2	0	2	1	0	0	-1.39736	0.99993	1
3	2	0	2	1	0.1	0	0	0	0
3	2	0	2	1	0.2	0	0	0	0
3	2	0	2	1	0.3	0	0	0	0
3	2	0	2	1	0.4	0	0	0	0
3	2	0	2	1	0.5	0	0	0	0
3	2	0	2	2	0	0	-2.69659	2.79985	1
3	2	0	2	2	0.1	0	-2.77627	2.49985	1
3	2	0	2	2	0.2	0	-2.60844	2.09988	1
3	2	0	2	2	0.3	0	-2.44211	1.89989	1
3	2	0	2	2	0.4	0	-1.39736	0.99993	1
3	2	0	2	2	0.5	0	0	0	0
3	2	0	2	3	0	0	-0.189727	4.29971	1
3	2	0	2	3	0.1	0	-0.15028	4.09974	1
3	2	0	2	3	0.2	0	-0.633647	3.69976	1
3	2	0	2	3	0.3	0	-2.78807	2.69984	1
3	2	0	2	3	0.4	0	-2.60844	2.19987	1
3	2	0	2	3	0.5	0	-2.60844	1.99988	1
3	2	0	3	1	0	0	-1.39736	1.29993	1
3	2	0	3	1	0.1	0	-1.39736	0.99993	1
3	2	0	3	1	0.2	0	-1.39736	0.99993	1
3	2	0	3	1	0.3	0	0	0	0
3	2	0	3	1	0.4	0	0	0	0
3	2	0	3	1	0.5	0	0	0	0
3	2	0	3	2	0	0	-2.69659	2.79985	1
3	2	0	3	2	0.1	0	-2.78807	2.69984	1
3	2	0	3	2	0.2	0	-2.77627	2.49985	1
3	2	0	3	2	0.3	0	-2.60844	1.99988	1
3	2	0	3	2	0.4	0	-1.39736	1.29993	1
3	2	0	3	2	0.5	0	0	0	0
3	2	0	3	3	0	0	-0.189727	4.39972	1
3	2	0	3	3	0.1	0	-0.189727	4.29971	1
3	2	0	3	3	0.2	0	-0.633647	3.99971	1
3	2	0	3	3	0.3	0	-2.69659	2.79985	1
3	2	0	3	3	0.4	0	-2.77627	2.49985	1
3	2	0	3	3	0.5	0	-2.60844	1.99988	1
3	2	0.1	1	1	0	0	0	0	0
3	2	0.1	1	1	0.1	0	0	0	0
3	2	0.1	1	1	0.2	0	0	0	0
3	2	0.1	1	1	0.3	0	0	0	0
3	2	0.1	1	1	0.4	0	0	0	0
3	2	0.1	1	1	0.5	0	0	0	0
3	2	0.1	1	2	0	0	-2.69659	2.69983	1
3	2	0.1	1	2	0.1	0	-2.77627	2.49985	1
3	2	0.1	1	2	0.2	0	-2.60844	1.99988	1
3	2	0.1	1	2	0.3	0	-2.60844	1.99988	1
3	2	0.1	1	2	0.4	0	-1.39736	0.99993	1
3	2	0.1	1	2	0.5	0	0	0	0
3	2	0.1	1	3	0	0	-0.189727	4.29971	1
3	2	0.1	1	3	0.1	0	-0.189727	4.19973	1
3	2	0.1	1	3	0.2	0	-0.633647	3.69976	1
3	2	0.1	1	3	0.3	0	-2.69659	2.69983	1
3	2	0.1	1	3	0.4	0	-2.77627	2.49985	1
3	2	0.1	1	3	0.5	0	-2.60844	1.99988	1
3	2	0.1	2	1	0	0	-1.39736	0.99993	1
3	2	0.1	2	1	0.1	0	-1.39736	0.99993	1
3	2	0.1	2	1	0.2	0	0	0	0
3	2	0.1	2	1	0.3	0	0	0	0
3	2	0.1	2	1	0.4	0	0	0	0
3	2	0.1	2	1	0.5	0	0	0	0
3	2	0.1	2	2	0	0	-1.4232	3.3998	1
3	2	0.1	2	2	0.1	0	-2.69659	2.69983	1
3	2	0.1	2	2	0.2	0	-2.77627	2.49985	1
3	2	0.1	2	2	0.3	0	-2.60844	1.99988	1
3	2	0.1	2	2	0.4	0	-1.39736	0.99993	1
3	2	0.1	2	2	0.5	0	0	0	0
3	2	0.1	2	3	0	0	-0.189727	4.29971	1
3	2	0.1	2	3	0.1	0	-0.189727	4.19973	1
3	2	0.1	2	3	0.2	0	-0.15028	3.99977	1
3	2	0.1	2	3	0.3	0	-1.20189	3.49979	1
3	2	0.1	2	3	0.4	0	-2.78807	2.59982	1
3	2	0.1	2	3	0.5	0	-2.60844	1.99988	1
3	2	0.1	3	1	0	0	-2.60844	1.99988	1
3	2	0.1	3	1	0.1	0	-1.39736	1.29993	1
3	2	0.1	3	1	0.2	0	-1.39736	0.99993	1
3	2	0.1	3	1	0.3	0	0	0	0
3	2	0.1	3	1	0.4	0	0	0	0
3	2	0.1	3	1	0.5	0	0	0	0
3	2	0.1	3	2	0	0	-0.633647	3.89974	1
3	2	0.1	3	2	0.1	0	-2.69659	2.79985	1
3	2	0.1	3	2	0.2	0	-2.78807	2.59982	1
3	2	0.1	3	2	0.3	0	-2.77627	2.39986	1
3	2	0.1	3	2	0.4	0	-2.60844	1.99988	1
3	2	0.1	3	2	0.5	0	-1.39736	0.99993	1
3	2	0.1	3	3	0	0	-0.189727	4.39972	1
3	2	0.1	3	3	0.1	0	-0.189727	4.29971	1
3	2	0.1	3	3	0.2	0	-0.189727	4.19973	1
3	2	0.1	3	3	0.3	0	-0.633647	3.69976	1
3	2	0.1	3	3	0.4	0	-2.69659	2.69983	1
3	2	0.1	3	3	0.5	0	-2.77627	2.39986	1
3	2	0.2	1	1	0	0	-1.39736	0.99993	1
3	2	0.2	1	1	0.1	0	0	0	0
3	2	0.2	1	1	0.2	0	0	0	0
3	2	0.2	1	1	0.3	0	0	0	0
3	2	0.2	1	1	0.4	0	0	0	0
3	2	0.2	1	1	0.5	0	0	0	0
3	2	0.2	1	2	0	0	-0.633647	3.59974	1
3	2	0.2	1	2	0.1	0	-2.69659	2.69983	1
3	2	0.2	1	2	0.2	0	-2.78807	2.49983	1
3	2	0.2	1	2	0.3	0	-2.60844	1.99988	1
3	2	0.2	1	2	0.4	0	-2.60844	1.69988	1
3	2	0.2	1	2	0.5	0	0	0	0
3	2	0.2	1	3	0	0	-0.189727	4.29971	1
3	2	0.2	1	3	0.1	0	-0.189727	4.19973	1
3	2	0.2	1	3	0.2	0	-0.189727	3.89978	1
3	2	0.2	1	3	0.3	0	-0.633647	3.59974	1
3	2	0.2	1	3	0.4	0	-2.69659	2.69983	1
3	2	0.2	1	3	0.5	0	-2.77627	2.29986	1
3	2	0.2	2	1	0	0	-2.60844	1.99988	1
3	2	0.2	2	1	0.1	0	-1.39736	0.99993	1
3	2	0.2	2	1	0.2	0	-1.39736	0.99993	1
3	2	0.2	2	1	0.3	0	0	0	0
3	2	0.2	2	1	0.4	0	0	0	0
3	2	0.2	2	1	0.5	0	0	0	0
3	2	0.2	2	2	0	0	-0.15028	3.79979	1
3	2	0.2	2	2	0.1	0	-0.936058	3.49979	1
3	2	0.2	2	2	0.2	0	-2.69659	2.69983	1
3	2	0.2	2	2	0.3	0	-2.77627	2.29986	1
3	2	0.2	2	2	0.4	0	-2.60844	1.99988	1
3	2	0.2	2	2	0.5	0	-1.39736	0.99993	1
3	2	0.2	2	3	0	0	-0.189727	4.39972	1
3	2	0.2	2	3	0.1	0	-0.189727	4.29971	1
3	2	0.2	2	3	0.2	0	-0.189727	4.09976	1
3	2	0.2	2	3	0.3	0	-0.15028	3.79979	1
3	2	0.2	2	3	0.4	0	-2.69659	2.69983	1
3	2	0.2	2	3	0.5	0	-2.77627	2.29986	1
3	2	0.2	3	1	0	0	-2.60844	1.99988	1
3	2	0.2	3	1	0.1	0	-2.60844	1.99988	1
3	2	0.2	3	1	0.2	0	-1.39736	0.99993	1
3	2	0.2	3	1	0.3	0	-1.39736	0.99993	1
3	2	0.2	3	1	0.4	0	0	0	0
3	2	0.2	3	1	0.5	0	0	0	0
3	2	0.2	3	2	0	0	-0.189727	4.09976	1
3	2	0.2	3	2	0.1	0	-0.633647	3.69976	1
3	2	0.2	3	2	0.2	0	-2.69659	2.69983	1
3	2	0.2	3	2	0.3	0	-2.78807	2.49983	1
3	2	0.2	3	2	0.4	0	-2.60844	1.99988	1
3	2	0.2	3	2	0.5	0	-1.39736	0.99993	1
3	2	0.2	3	3	0	0	-0.189727	4.39972	1
3	2	0.2	3	3	0.1	0	-0.189727	4.29971	1
3	2	0.2	3	3	0.2	0	-0.189727	4.19973	1
3	2	0.2	3	3	0.3	0	-0.189727	3.89978	1
3	2	0.2	3	3	0.4	0	-0.936058	3.49979	1
3	2	0.2	3	3	0.5	0	-2.78807	2.49983	1
3	2	-0.2	1	1	0	1	0	0	0
3	2	-0.2	1	1	0.1	1	0	0	0
3	2	-0.2	1	1	0.2	1	0	0	0
3	2	-0.2	1	1	0.3	1	0	0	0
3	2	-0.2	1	1	0.4	1	0	0	0
3	2	-0.2	1	1	0.5	1	0	0	0
3	2	-0.2	1	2	0	1	0	0	0
3	2	-0.2	1	2	0.1	1	0	0	0
3	2	-0.2	1	2	0.2	1	0	0	0
3	2	-0.2	1	2	0.3	1	0	0	0
3	2	-0.2	1	2	0.4	1	0	0	0
3	2	-0.2	1	2	0.5	1	0	0	0
3	2	-0.2	1	3	0	1	0	0	0
3	2	-0.2	1	3	0.1	1	0	0	0
3	2	-0.2	1	3	0.2	1	0	0	0
3	2	-0.2	1	3	0.3	1	0	0	0
3	2	-0.2	1	3	0.4	1	0	0	0
3	2	-0.2	1	3	0.5	1	0	0	0
3	2	-0.2	2	1	0	1	0	0	0
3	2	-0.2	2	1	0.1	1	0	0	0
3	2	-0.2	2	1	0.2	1	0	0	0
3	2	-0.2	2	1	0.3	1	0	0	0
3	2	-0.2	2	1	0.4	1	0	0	0
3	2	-0.2	2	1	0.5	1	0	0	0
3	2	-0.2	2	2	0	1	0	0	0
3	2	-0.2	2	2	0.1	1	0	0	0
3	2	-0.2	2	2	0.2	1	0	0	0
3	2	-0.2	2	2	0.3	1	0	0	0
3	2	-0.2	2	2	0.4	1	0	0	0
3	2	-0.2	2	2	0.5	1	0	0	0
3	2	-0.2	2	3	0	1	0	0	0
3	2	-0.2	2	3	0.1	1	0	0	0
3	2	-0.2	2	3	0.2	1	0	0	0
3	2	-0.2	2	3	0.3	1	0	0	0
3	2	-0.2	2	3	0.4	1	0	0	0
3	2	-0.2	2	3	0.5	1	0	0	0
3	2	-0.2	3	1	0	1	0	0	0
3	2	-0.2	3	1	0.1	1	0	0	0
3	2	-0.2	3	1	0.2	1	0	0	0
3	2	-0.2	3	1	0.3	1	0	0	0
3	2	-0.2	3	1	0.4	1	0	0	0
3	2	-0.2	3	1	0.5	1	0	0	0
3	2	-0.2	3	2	0	1	0	0	0
3	2	-0.2	3	2	0.1	1	0	0	0
3	2	-0.2	3	2	0.2	1	0	0	0
3	2	-0.2	3	2	0.3	1	0	0	0
3	2	-0.2	3	2	0.4	1	0	0	0
3	2	-0.2	3	2	0.5	1	0	0	0
3	2	-0.2	3	3	0	1	0	0	0
3	2	-0.2	3	3	0.1	1	0	0	0
3	2	-0.2	3	3	0.2	1	0	0	0
3	2	-0.2	3	3	0.3	1	0	0	0
3	2	-0.2	3	3	0.4	1	0	0	0
3	2	-0.2	3	3	0.5	1	0	0	0
3	2	-0.1	1	1	0	1	0	0	0
3	2	-0.1	1	1	0.1	1	0	0	0
3	2	-0.1	1	1	0.2	1	0	0	0
3	2	-0.1	1	1	0.3	1	0	0	0
3	2	-0.1	1	1	0.4	1	0	0	0
3	2	-0.1	1	1	0.5	1	0	0	0
3	2	-0.1	1	2	0	1	0	0	0
3	2	-0.1	1	2	0.1	1	0	0	0
3	2	-0.1	1	2	0.2	1	0	0	0
3	2	-0.1	1	2	0.3	1	0	0	0
3	2	-0.1	1	2	0.4	1	0	0	0
3	2	-0.1	1	2	0.5	1	0	0	0
3	2	-0.1	1	3	0	1	0	0	0
3	2	-0.1	1	3	0.1	1	0	0	0
3	2	-0.1	1	3	0.2	1	0	0	0
3	2	-0.1	1	3	0.3	1	0	0	0
3	2	-0.1	1	3	0.4	1	0	0	0
3	2	-0.1	1	3	0.5	1	0	0	0
3	2	-0.1	2	1	0	1	0	0	0
3	2	-0.1	2	1	0.1	1	0	0	0
3	2	-0.1	2	1	0.2	1	0	0	0
3	2	-0.1	2	1	0.3	1	0	0	0
3	2	-0.1	2	1	0.4	1	0	0	0
3	2	-0.1	2	1	0.5	1	0	0	0
3	2	-0.1	2	2	0	1	0	0	0
3	2	-0.1	2	2	0.1	1	0	0	0
3	2	-0.1	2	2	0.2	1	0	0	0
3	2	-0.1	2	2	0.3	1	0	0	0
3	2	-0.1	2	2	0.4	1	0	0	0
3	2	-0.1	2	2	0.5	1	0	0	0
3	2	-0.1	2	3	0	1	0	0	0
3	2	-0.1	2	3	0.1	1	0	0	0
3	2	-0.1	2	3	0.2	1	0	0	0
3	2	-0.1	2	3	0.3	1	0	0	0
3	2	-0.1	2	3	0.4	1	0	0	0
3	2	-0.1	2	3	0.5	1	0	0	0
3	2	-0.1	3	1	0	1	0	0	0
3	2	-0.1	3	1	0.1	1	0	0	0
3	2	-0.1	3	1	0.2	1	0	0	0
3	2	-0.1	3	1	0.3	1	0	0	0
3	2	-0.1	3	1	0.4	1	0	0	0
3	2	-0.1	3	1	0.5	1	0	0	0
3	2	-0.1	3	2	0	1	0	0	0
3	2	-0.1	3	2	0.1	1	0	0	0
3	2	-0.1	3	2	0.2	1	0	0	0
3	2	-0.1	3	2	0.3	1	0	0	0
3	2	-0.1	3	2	0.4	1	0	0	0
3	2	-0.1	3	2	0.5	1	0	0	0
3	2	-0.1	3	3	0	1	-0.145699	1.59978	1
3	2	-0.1	3	3	0.1	1	0	0	0
3	2	-0.1	3	3	0.2	1	0	0	0
3	2	-0.1	3	3	0.3	1	0	0	0
3	2	-0.1	3	3	0.4	1	0	0	0
3	2	-0.1	3	3	0.5	1	0	0	0
3	2	0	1	1	0	1	0	0	0
3	2	0	1	1	0.1	1	0	0	0
3	2	0	1	1	0.2	1	0	0	0
3	2	0	1	1	0.3	1	0	0	0
3	2	0	1	1	0.4	1	0	0	0
3	2	0	1	1	0.5	1	0	0	0
3	2	0	1	2	0	1	0	0	0
3	2	0	1	2	0.1	1	0	0	0
3	2	0	1	2	0.2	1	0	0	0
3	2	0	1	2	0.3	1	0	0	0
3	2	0	1	2	0.4	1	0	0	0
3	2	0	1	2	0.5	1	0	0	0
3	2	0	1	3	0	1	0	0	0
3	2	0	1	3	0.1	1	0	0	0
3	2	0	1	3	0.2	1	0	0	0
3	2	0	1	3	0.3	1	0	0	0
3	2	0	1	3	0.4	1	0	0	0
3	2	0	1	3	0.5	1	0	0	0
3	2	0	2	1	0	1	0	0	0
3	2	0	2	1	0.1	1	0	0	0
3	2	0	2	1	0.2	1	0	0	0
3	2	0	2	1	0.3	1	0	0	0
3	2	0	2	1	0.4	1	0	0	0
3	2	0	2	1	0.5	1	0	0	0
3	2	0	2	2	0	1	0	0	0
3	2	0	2	2	0.1	1	0	0	0
3	2	0	2	2	0.2	1	0	0	0
3	2	0	2	2	0.3	1	0	0	0
3	2	0	2	2	0.4	1	0	0	0
3	2	0	2	2	0.5	1	0	0	0
3	2	0	2	3	0	1	-0.00781489	1.59994	1
3	2	0	2	3	0.1	1	0	0	0
3	2	0	2	3	0.2	1	0	0	0
3	2	0	2	3	0.3	1	0	0	0
3	2	0	2	3	0.4	1	0	0	0
3	2	0	2	3	0.5	1	0	0	0
3	2	0	3	1	0	1	0	0	0
3	2	0	3	1	0.1	1	0	0	0
3	2	0	3	1	0.2	1	0	0	0
3	2	0	3	1	0.3	1	0	0	0
3	2	0	3	1	0.4	1	0	0	0
3	2	0	3	1	0.5	1	0	0	0
3	2	0	3	2	0	1	0	0	0
3	2	0	3	2	0.1	1	0	0	0
3	2	0	3	2	0.2	1	0	0	0
3	2	0	3	2	0.3	1	0	0	0
3	2	0	3	2	0.4	1	0	0	0
3	2	0	3	2	0.5	1	0	0	0
3	2	0	3	3	0	1	-0.00781489	1.79992	1
3	2	0	3	3	0.1	1	-0.00781489	1.59994	1
3	2	0	3	3	0.2	1	0	0	0
3	2	0	3	3	0.3	1	0	0	0
3	2	0	3	3	0.4	1	0	0	0
3	2	0	3	3	0.5	1	0	0	0
3	2	0.1	1	1	0	1	0	0	0
3	2	0.1	1	1	0.1	1	0	0	0
3	2	0.1	1	1	0.2	1	0	0	0
3	2	0.1	1	1	0.3	1	0	0	0
3	2	0.1	1	1	0.4	1	0	0	0
3	2	0.1	1	1	0.5	1	0	0	0
3	2	0.1	1	2	0	1	0	0	0
3	2	0.1	1	2	0.1	1	0	0	0
3	2	0.1	1	2	0.2	1	0	0	0
3	2	0.1	1	2	0.3	1	0	0	0
3	2	0.1	1	2	0.4	1	0	0	0
3	2	0.1	1	2	0.5	1	0	0	0
3	2	0.1	1	3	0	1	-0.00781489	1.59994	1
3	2	0.1	1	3	0.1	1	0	0	0
3	2	0.1	1	3	0.2	1	0	0	0
3	2	0.1	1	3	0.3	1	0	0	0
3	2	0.1	1	3	0.4	1	0	0	0
3	2	0.1	1	3	0.5	1	0	0	0
3	2	0.1	2	1	0	1	0	0	0
3	2	0.1	2	1	0.1	1	0	0	0
3	2	0.1	2	1	0.2	1	0	0	0
3	2	0.1	2	1	0.3	1	0	0	0
3	2	0.1	2	1	0.4	1	0	0	0
3	2	0.1	2	1	0.5	1	0	0	0
3	2	0.1	2	2	0	1	0	0	0
3	2	0.1	2	2	0.1	1	0	0	0
3	2	0.1	2	2	0.2	1	0	0	0
3	2	0.1	2	2	0.3	1	0	0	0
3	2	0.1	2	2	0.4	1	0	0	0
3	2	0.1	2	2	0.5	1	0	0	0
3	2	0.1	2	3	0	1	-0.873615	2.29987	1
3	2	0.1	2	3	0.1	1	-0.00781489	1.59994	1
3	2	0.1	2	3	0.2	1	0	0	0
3	2	0.1	2	3	0.3	1	0	0	0
3	2	0.1	2	3	0.4	1	0	0	0
3	2	0.1	2	3	0.5	1	0	0	0
3	2	0.1	3	1	0	1	0	0	0
3	2	0.1	3	1	0.1	1	0	0	0
3	2	0.1	3	1	0.2	1	0	0	0
3	2	0.1	3	1	0.3	1	0	0	0
3	2	0.1	3	1	0.4	1	0	0	0
3	2	0.1	3	1	0.5	1	0	0	0
3	2	0.1	3	2	0	1	-0.145699	1.39978	1
3	2	0.1	3	2	0.1	1	0	0	0
3	2	0.1	3	2	0.2	1	0	0	0
3	2	0.1	3	2	0.3	1	0	0	0
3	2	0.1	3	2	0.4	1	0	0	0
3	2	0.1	3	2	0.5	1	0	0	0
3	2	0.1	3	3	0	1	-0.974848	2.59984	1
3	2	0.1	3	3	0.1	1	-0.00781489	1.69992	1
3	2	0.1	3	3	0.2	1	-0.00781489	1.59994	1
3	2	0.1	3	3	0.3	1	0	0	0
3	2	0.1	3	3	0.4	1	0	0	0
3	2	0.1	3	3	0.5	1	0	0	0
3	2	0.2	1	1	0	1	0	0	0
3	2	0.2	1	1	0.1	1	0	0	0
3	2	0.2	1	1	0.2	1	0	0	0
3	2	0.2	1	1	0.3	1	0	0	0
3	2	0.2	1	1	0.4	1	0	0	0
3	2	0.2	1	1	0.5	1	0	0	0
3	2	0.2	1	2	0	1	0	0	0
3	2	0.2	1	2	0.1	1	0	0	0
3	2	0.2	1	2	0.2	1	0	0	0
3	2	0.2	1	2	0.3	1	0	0	0
3	2	0.2	1	2	0.4	1	0	0	0
3	2	0.2	1	2	0.5	1	0	0	0
3	2	0.2	1	3	0	1	-0.974848	2.39987	1
3	2	0.2	1	3	0.1	1	-0.00781489	1.59994	1
3	2	0.2	1	3	0.2	1	-0.145699	1.39978	1
3	2	0.2	1	3	0.3	1	0	0	0
3	2	0.2	1	3	0.4	1	0	0	0
3	2	0.2	1	3	0.5	1	0	0	0
3	2	0.2	2	1	0	1	0	0	0
3	2	0.2	2	1	0.1	1	0	0	0
3	2	0.2	2	1	0.2	1	0	0	0
3	2	0.2	2	1	0.3	1	0	0	0
3	2	0.2	2	1	0.4	1	0	0	0
3	2	0.2	2	1	0.5	1	0	0	0
3	2	0.2	2	2	0	1	-0.145699	1.39978	1
3	2	0.2	2	2	0.1	1	0	0	0
3	2	0.2	2	2	0.2	1	0	0	0
3	2	0.2	2	2	0.3	1	0	0	0
3	2	0.2	2	2	0.4	1	0	0	0
3	2	0.2	2	2	0.5	1	0	0	0
3	2	0.2	2	3	0	1	-0.974848	2.59984	1
3	2	0.2	2	3	0.1	1	-0.834709	2.29988	1
3	2	0.2	2	3	0.2	1	-0.00781489	1.59994	1
3	2	0.2	2	3	0.3	1	0	0	0
3	2	0.2	2	3	0.4	1	0	0	0
3	2	0.2	2	3	0.5	1	0	0	0
3	2	0.2	3	1	0	1	0	0	0
3	2	0.2	3	1	0.1	1	0	0	0
3	2	0.2	3	1	0.2	1	0	0	0
3	2	0.2	3	1	0.3	1	0	0	0
3	2	0.2	3	1	0.4	1	0	0	0
3	2	0.2	3	1	0.5	1	0	0	0
3	2	0.2	3	2	0	1	-0.00781489	1.59994	1
3	2	0.2	3	2	0.1	1	-0.00781489	1.49992	1
3	2	0.2	3	2	0.2	1	0	0	0
3	2	0.2	3	2	0.3	1	0	0	0
3	2	0.2	3	2	0.4	1	0	0	0
3	2	0.2	3	2	0.5	1	0	0	0
3	2	0.2	3	3	0	1	-1.06959	2.9998	1
3	2	0.2	3	3	0.1	1	-0.974848	2.59984	1
3	2	0.2	3	3	0.2	1	-0.873615	2.09989	1
3	2	0.2	3	3	0.3	1	-0.00781489	1.49992	1
3	2	0.2	3	3	0.4	1	0	0	0
3	2	0.2	3	3	0.5	1	0	0	0
3	3	-0.2	1	1	0	0	-8.15073	1.19992	1
3	3	-0.2	1	1	0.1	0	-8.1262	1.09992	1
3	3	-0.2	1	1	0.2	0	-8.1262	1.09992	1
3	3	-0.2	1	1	0.3	0	-8.11398	0.99987	1
3	3	-0.2	1	1	0.4	0	-8.11398	0.99987	1
3	3	-0.2	1	1	0.5	0	-8.11398	0.99987	1
3	3	-0.2	1	2	0	0	-8.04775	1.49991	1
3	3	-0.2	1	2	0.1	0	-8.23195	1.39991	1
3	3	-0.2	1	2	0.2	0	-8.23195	1.39991	1
3	3	-0.2	1	2	0.3	0	-8.2565	1.29994	1
3	3	-0.2	1	2	0.4	0	-8.15073	1.19992	1
3	3	-0.2	1	2	0.5	0	-8.1262	1.09992	1
3	3	-0.2	1	3	0	0	8.11028	1.89986	1
3	3	-0.2	1	3	0.1	0	8.06875	1.79988	1
3	3	-0.2	1	3	0.2	0	8.04617	1.69988	1
3	3	-0.2	1	3	0.3	0	8.0847	1.59991	1
3	3	-0.2	1	3	0.4	0	-8.23195	1.39991	1
3	3	-0.2	1	3	0.5	0	-8.2565	1.29994	1
3	3	-0.2	2	1	0	0	-8.15073	1.19992	1
3	3	-0.2	2	1	0.1	0	-8.15073	1.19992	1
3	3	-0.2	2	1	0.2	0	-8.1262	1.09992	1
3	3	-0.2	2	1	0.3	0	-8.1262	1.09992	1
3	3	-0.2	2	1	0.4	0	-8.11398	0.99987	1
3	3	-0.2	2	1	0.5	0	-8.11398	0.99987	1
3	3	-0.2	2	2	0	0	8.0847	1.59991	1
3	3	-0.2	2	2	0.1	0	-8.04775	1.49991	1
3	3	-0.2	2	2	0.2	0	-8.23195	1.39991	1
3	3	-0.2	2	2	0.3	0	-8.2565	1.29994	1
3	3	-0.2	2	2	0.4	0	-8.2565	1.29994	1
3	3	-0.2	2	2	0.5	0	-8.15073	1.19992	1
3	3	-0.2	2	3	0	0	8.16465	1.99987	1
3	3	-0.2	2	3	0.1	0	8.11028	1.89986	1
3	3	-0.2	2	3	0.2	0	8.04617	1.69988	1
3	3	-0.2	2	3	0.3	0	8.0847	1.59991	1
3	3	-0.2	2	3	0.4	0	-8.04775	1.49991	1
3	3	-0.2	2	3	0.5	0	-8.23195	1.39991	1
3	3	-0.2	3	1	0	0	-8.2565	1.29994	1
3	3	-0.2	3	1	0.1	0	-8.2565	1.29994	1
3	3	-0.2	3	1	0.2	0	-8.15073	1.19992	1
3	3	-0.2	3	1	0.3	0	-8.1262	1.09992	1
3	3	-0.2	3	1	0.4	0	-8.1262	1.09992	1
3	3	-0.2	3	1	0.5	0	-8.11398	0.99987	1
3	3	-0.2	3	2	0	0	8.04617	1.69988	1
3	3	-0.2	3	2	0.1	0	8.0847	1.59991	1
3	3	-0.2	3	2	0.2	0	-8.04775	1.49991	1
3	3	-0.2	3	2	0.3	0	-8.23195	1.39991	1
3	3	-0.2	3	2	0.4	0	-8.2565	1.29994	1
3	3	-0.2	3	2	0.5	0	-8.15073	1.19992	1
3	3	-0.2	3	3	0	0	8.24206	2.09986	1
3	3	-0.2	3	3	0.1	0	8.11028	1.89986	1
3	3	-0.2	3	3	0.2	0	8.06875	1.79988	1
3	3	-0.2	3	3	0.3	0	8.04617	1.69988	1
3	3	-0.2	3	3	0.4	0	-8.04775	1.49991	1
3	3	-0.2	3	3	0.5	0	-8.23195	1.39991	1
3	3	-0.1	1	1	0	0	-8.2565	1.29994	1
3	3	-0.1	1	1	0.1	0	-8.15073	1.19992	1
3	3	-0.1	1	1	0.2	0	-8.15073	1.19992	1
3	3	-0.1	1	1	0.3	0	-8.1262	1.09992	1
3	3	-0.1	1	1	0.4	0	-8.1262	1.09992	1
3	3	-0.1	1	1	0.5	0	-8.11398	0.99987	1
3	3	-0.1	1	2	0	0	8.04617	1.69988	1
3	3	-0.1	1	2	0.1	0	8.0847	1.59991	1
3	3	-0.1	1	2	0.2	0	-8.04775	1.49991	1
3	3	-0.1	1	2	0.3	0	-8.23195	1.39991	1
3	3	-0.1	1	2	0.4	0	-8.2565	1.29994	1
3	3	-0.1	1	2	0.5	0	-8.2565	1.29994	1
3	3	-0.1	1	3	0	0	8.16465	1.99987	1
3	3	-0.1	1	3	0.1	0	8.11028	1.89986	1
3	3	-0.1	1	3	0.2	0	8.06875	1.79988	1
3	3	-0.1	1	3	0.3	0	8.04617	1.69988	1
3	3	-0.1	1	3	0.4	0	8.0847	1.59991	1
3	3	-0.1	1	3	0.5	0	-8.23195	1.39991	1
3	3	-0.1	2	1	0	0	-8.2565	1.29994	1
3	3	-0.1	2	1	0.1	0	-8.2565	1.29994	1
3	3	-0.1	2	1	0.2	0	-8.2565	1.29994	1
3	3	-0.1	2	1	0.3	0	-8.15073	1.19992	1
3	3	-0.1	2	1	0.4	0	-8.1262	1.09992	1
3	3	-0.1	2	1	0.5	0	-8.1262	1.09992	1
3	3	-0.1	2	2	0	0	8.04617	1.69988	1
3	3	-0.1	2	2	0.1	0	8.0847	1.59991	1
3	3	-0.1	2	2	0.2	0	-8.04775	1.49991	1
3	3	-0.1	2	2	0.3	0	-8.23195	1.39991	1
3	3	-0.1	2	2	0.4	0	-8.23195	1.39991	1
3	3	-0.1	2	2	0.5	0	-8.2565	1.29994	1
3	3	-0.1	2	3	0	0	8.24206	2.09986	1
3	3	-0.1	2	3	0.1	0	8.16465	1.99987	1
3	3	-0.1	2	3	0.2	0	8.11028	1.89986	1
3	3	-0.1	2	3	0.3	0	8.04617	1.69988	1
3	3	-0.1	2	3	0.4	0	8.0847	1.59991	1
3	3	-0.1	2	3	0.5	0	-8.23195	1.39991	1
3	3	-0.1	3	1	0	0	-8.23195	1.39991	1
3	3	-0.1	3	1	0.1	0	-8.23195	1.39991	1
3	3	-0.1	3	1	0.2	0	-8.2565	1.29994	1
3	3	-0.1	3	1	0.3	0	-8.15073	1.19992	1
3	3	-0.1	3	1	0.4	0	-8.15073	1.19992	1
3	3	-0.1	3	1	0.5	0	-8.1262	1.09992	1
3	3	-0.1	3	2	0	0	8.06875	1.79988	1
3	3	-0.1	3	2	0.1	0	8.04617	1.69988	1
3	3	-0.1	3	2	0.2	0	8.0847	1.59991	1
3	3	-0.1	3	2	0.3	0	-8.04775	1.49991	1
3	3	-0.1	3	2	0.4	0	-8.23195	1.39991	1
3	3	-0.1	3	2	0.5	0	-8.2565	1.29994	1
3	3	-0.1	3	3	0	0	8.24206	2.09986	1
3	3	-0.1	3	3	0.1	0	8.24206	2.09986	1
3	3	-0.1	3	3	0.2	0	8.11028	1.89986	1
3	3	-0.1	3	3	0.3	0	8.06875	1.79988	1
3	3	-0.1	3	3	0.4	0	8.0847	1.59991	1
3	3	-0.1	3	3	0.5	0	-8.04775	1.49991	1
3	3	0	1	1	0	0	-8.23195	1.39991	1
3	3	0	1	1	0.1	0	-8.2565	1.29994	1
3	3	0	1	1	0.2	0	-8.2565	1.29994	1
3	3	0	1	1	0.3	0	-8.2565	1.29994	1
3	3	0	1	1	0.4	0	-8.15073	1.19992	1
3	3	0	1	1	0.5	0	-8.15073	1.19992	1
3	3	0	1	2	0	0	8.06875	1.79988	1
3	3	0	1	2	0.1	0	8.04617	1.69988	1
3	3	0	1	2	0.2	0	8.0847	1.59991	1
3	3	0	1	2	0.3	0	-8.04775	1.49991	1
3	3	0	1	2	0.4	0	-8.23195	1.39991	1
3	3	0	1	2	0.5	0	-8.23195	1.39991	1
3	3	0	1	3	0	0	8.24206	2.09986	1
3	3	0	1	3	0.1	0	8.24206	2.09986	1
3	3	0	1	3	0.2	0	8.11028	1.89986	1
3	3	0	1	3	0.3	0	8.06875	1.79988	1
3	3	0	1	3	0.4	0	8.04617	1.69988	1
3	3	0	1	3	0.5	0	-8.04775	1.49991	1
3	3	0	2	1	0	0	-8.23195	1.39991	1
3	3	0	2	1	0.1	0	-8.23195	1.39991	1
3	3	0	2	1	0.2	0	-8.2565	1.29994	1
3	3	0	2	1	0.3	0	-8.2565	1.29994	1
3	3	0	2	1	0.4	0	-8.2565	1.29994	1
3	3	0	2	1	0.5	0	-8.15073	1.19992	1
3	3	0	2	2	0	0	8.06875	1.79988	1
3	3	0	2	2	0.1	0	8.04617	1.69988	1
3	3	0	2	2	0.2	0	8.04617	1.69988	1
3	3	0	2	2	0.3	0	8.0847	1.59991	1
3	3	0	2	2	0.4	0	-8.23195	1.39991	1
3	3	0	2	2	0.5	0	-8.23195	1.39991	1
3	3	0	2	3	0	0	8.24206	2.09986	1
3	3	0	2	3	0.1	0	8.24206	2.09986	1
3	3	0	2	3	0.2	0	8.16465	1.99987	1
3	3	0	2	3	0.3	0	8.06875	1.79988	1
3	3	0	2	3	0.4	0	8.04617	1.69988	1
3	3	0	2	3	0.5	0	8.0847	1.59991	1
3	3	0	3	1	0	0	-8.04775	1.49991	1
3	3	0	3	1	0.1	0	-8.23195	1.39991	1
3	3	0	3	1	0.2	0	-8.23195	1.39991	1
3	3	0	3	1	0.3	0	-8.2565	1.29994	1
3	3	0	3	1	0.4	0	-8.2565	1.29994	1
3	3	0	3	1	0.5	0	-8.15073	1.19992	1
3	3	0	3	2	0	0	8.11028	1.89986	1
3	3	0	3	2	0.1	0	8.06875	1.79988	1
3	3	0	3	2	0.2	0	8.04617	1.69988	1
3	3	0	3	2	0.3	0	8.0847	1.59991	1
3	3	0	3	2	0.4	0	-8.04775	1.49991	1
3	3	0	3	2	0.5	0	-8.23195	1.39991	1
3	3	0	3	3	0	0	8.24206	2.09986	1
3	3	0	3	3	0.1	0	8.24206	2.09986	1
3	3	0	3	3	0.2	0	8.24206	2.09986	1
3	3	0	3	3	0.3	0	8.11028	1.89986	1
3	3	0	3	3	0.4	0	8.04617	1.69988	1
3	3	0	3	3	0.5	0	8.0847	1.59991	1
3	3	0.1	1	1	0	0	-8.23195	1.39991	1
3	3	0.1	1	1	0.1	0	-8.23195	1.39991	1
3	3	0.1	1	1	0.2	0	-8.23195	1.39991	1
3	3	0.1	1	1	0.3	0	-8.2565	1.29994	1
3	3	0.1	1	1	0.4	0	-8.2565	1.29994	1
3	3	0.1	1	1	0.5	0	-8.2565	1.29994	1
3	3	0.1	1	2	0	0	8.11028	1.89986	1
3	3	0.1	1	2	0.1	0	8.06875	1.79988	1
3	3	0.1	1	2	0.2	0	8.04617	1.69988	1
3	3	0.1	1	2	0.3	0	8.0847	1.59991	1
3	3	0.1	1	2	0.4	0	-8.04775	1.49991	1
3	3	0.1	1	2	0.5	0	-8.23195	1.39991	1
3	3	0.1	1	3	0	0	8.24206	2.09986	1
3	3	0.1	1	3	0.1	0	8.24206	2.09986	1
3	3	0.1	1	3	0.2	0	8.16465	1.99987	1
3	3	0.1	1	3	0.3	0	8.11028	1.89986	1
3	3	0.1	1	3	0.4	0	8.06875	1.79988	1
3	3	0.1	1	3	0.5	0	8.04617	1.69988	1
3	3	0.1	2	1	0	0	-8.04775	1.49991	1
3	3	0.1	2	1	0.1	0	-8.04775	1.49991	1
3	3	0.1	2	1	0.2	0	-8.23195	1.39991	1
3	3	0.1	2	1	0.3	0	-8.23195	1.39991	1
3	3	0.1	2	1	0.4	0	-8.2565	1.29994	1
3	3	0.1	2	1	0.5	0	-8.2565	1.29994	1
3	3	0.1	2	2	0	0	8.16465	1.99987	1
3	3	0.1	2	2	0.1	0	8.11028	1.89986	1
3	3	0.1	2	2	0.2	0	8.06875	1.79988	1
3	3	0.1	2	2	0.3	0	8.04617	1.69988	1
3	3	0.1	2	2	0.4	0	8.0847	1.59991	1
3	3	0.1	2	2	0.5	0	-8.23195	1.39991	1
3	3	0.1	2	3	0	0	8.24206	2.09986	1
3	3	0.1	2	3	0.1	0	8.24206	2.09986	1
3	3	0.1	2	3	0.2	0	8.24206	2.09986	1
3	3	0.1	2	3	0.3	0	8.16465	1.99987	1
3	3	0.1	2	3	0.4	0	8.06875	1.79988	1
3	3	0.1	2	3	0.5	0	8.04617	1.69988	1
3	3	0.1	3	1	0	0	8.0847	1.59991	1
3	3	0.1	3	1	0.1	0	-8.04775	1.49991	1
3	3	0.1	3	1	0.2	0	-8.04775	1.49991	1
3	3	0.1	3	1	0.3	0	-8.23195	1.39991	1
3	3	0.1	3	1	0.4	0	-8.23195	1.39991	1
3	3	0.1	3	1	0.5	0	-8.2565	1.29994	1
3	3	0.1	3	2	0	0	8.24206	2.09986	1
3	3	0.1	3	2	0.1	0	8.11028	1.89986	1
3	3	0.1	3	2	0.2	0	8.06875	1.79988	1
3	3	0.1	3	2	0.3	0	8.04617	1.69988	1
3	3	0.1	3	2	0.4	0	8.0847	1.59991	1
3	3	0.1	3	2	0.5	0	-8.04775	1.49991	1
3	3	0.1	3	3	0	0	8.24206	2.09986	1
3	3	0.1	3	3	0.1	0	8.24206	2.09986	1
3	3	0.1	3	3	0.2	0	8.24206	2.09986	1
3	3	0.1	3	3	0.3	0	8.16465	1.99987	1
3	3	0.1	3	3	0.4	0	8.11028	1.89986	1
3	3	0.1	3	3	0.5	0	8.04617	1.69988	1
3	3	0.2	1	1	0	0	8.0847	1.59991	1
3	3	0.2	1	1	0.1	0	-8.04775	1.49991	1
3	3	0.2	1	1	0.2	0	-8.23195	1.39991	1
3	3	0.2	1	1	0.3	0	-8.23195	1.39991	1
3	3	0.2	1	1	0.4	0	-8.23195	1.39991	1
3	3	0.2	1	1	0.5	0	-8.2565	1.29994	1
3	3	0.2	1	2	0	0	8.16465	1.99987	1
3	3	0.2	1	2	0.1	0	8.11028	1.89986	1
3	3	0.2	1	2	0.2	0	8.06875	1.79988	1
3	3	0.2	1	2	0.3	0	8.04617	1.69988	1
3	3	0.2	1	2	0.4	0	8.0847	1.59991	1
3	3	0.2	1	2	0.5	0	-8.04775	1.49991	1
3	3	0.2	1	3	0	0	8.24206	2.09986	1
3	3	0.2	1	3	0.1	0	8.24206	2.09986	1
3	3	0.2	1	3	0.2	0	8.24206	2.09986	1
3	3	0.2	1	3	0.3	0	8.16465	1.99987	1
3	3	0.2	1	3	0.4	0	8.11028	1.89986	1
3	3	0.2	1	3	0.5	0	8.04617	1.69988	1
3	3	0.2	2	1	0	0	8.0847	1.59991	1
3	3	0.2	2	1	0.1	0	8.0847	1.59991	1
3	3	0.2	2	1	0.2	0	-8.04775	1.49991	1
3	3	0.2	2	1	0.3	0	-8.23195	1.39991	1
3	3	0.2	2	1	0.4	0	-8.23195	1.39991	1
3	3	0.2	2	1	0.5	0	-8.23195	1.39991	1
3	3	0.2	2	2	0	0	8.24206	2.09986	1
3	3	0.2	2	2	0.1	0	8.16465	1.99987	1
3	3	0.2	2	2	0.2	0	8.11028	1.89986	1
3	3	0.2	2	2	0.3	0	8.06875	1.79988	1
3	3	0.2	2	2	0.4	0	8.04617	1.69988	1
3	3	0.2	2	2	0.5	0	8.0847	1.59991	1
3	3	0.2	2	3	0	0	8.24206	2.09986	1
3	3	0.2	2	3	0.1	0	8.24206	2.09986	1
3	3	0.2	2	3	0.2	0	8.24206	2.09986	1
3	3	0.2	2	3	0.3	0	8.24206	2.09986	1
3	3	0.2	2	3	0.4	0	8.11028	1.89986	1
3	3	0.2	2	3	0.5	0	8.06875	1.79988	1
3	3	0.2	3	1	0	0	8.04617	1.69988	1
3	3	0.2	3	1	0.1	0	8.0847	1.59991	1
3	3	0.2	3	1	0.2	0	8.0847	1.59991	1
3	3	0.2	3	1	0.3	0	-8.04775	1.49991	1
3	3	0.2	3	1	0.4	0	-8.23195	1.39991	1
3	3	0.2	3	1	0.5	0	-8.23195	1.39991	1
3	3	0.2	3	2	0	0	8.24206	2.09986	1
3	3	0.2	3	2	0.1	0	8.24206	2.09986	1
3	3	0.2	3	2	0.2	0	8.11028	1.89986	1
3	3	0.2	3	2	0.3	0	8.06875	1.79988	1
3	3	0.2	3	2	0.4	0	8.04617	1.69988	1
3	3	0.2	3	2	0.5	0	8.0847	1.59991	1
3	3	0.2	3	3	0	0	8.24206	2.09986	1
3	3	0.2	3	3	0.1	0	8.24206	2.09986	1
3	3	0.2	3	3	0.2	0	8.24206	2.09986	1
3	3	0.2	3	3	0.3	0	8.24206	2.09986	1
3	3	0.2	3	3	0.4	0	8.16465	1.99987	1
3	3	0.2	3	3	0.5	0	8.06875	1.79988	1
3	3	-0.2	1	1	0	1	0	0	0
3	3	-0.2	1	1	0.1	1	0	0	0
3	3	-0.2	1	1	0.2	1	0	0	0
3	3	-0.2	1	1	0.3	1	0	0	0
3	3	-0.2	1	1	0.4	1	0	0	0
3	3	-0.2	1	1	0.5	1	0	0	0
3	3	-0.2	1	2	0	1	0	0	0
3	3	-0.2	1	2	0.1	1	0	0	0
3	3	-0.2	1	2	0.2	1	0	0	0
3	3	-0.2	1	2	0.3	1	0	0	0
3	3	-0.2	1	2	0.4	1	0	0	0
3	3	-0.2	1	2	0.5	1	0	0	0
3	3	-0.2	1	3	0	1	7.24698	0.39998	1
3	3	-0.2	1	3	0.1	1	0	0	0
3	3	-0.2	1	3	0.2	1	0	0	0
3	3	-0.2	1	3	0.3	1	0	0	0
3	3	-0.2	1	3	0.4	1	0	0	0
3	3	-0.2	1	3	0.5	1	0	0	0
3	3	-0.2	2	1	0	1	0	0	0
3	3	-0.2	2	1	0.1	1	0	0	0
3	3	-0.2	2	1	0.2	1	0	0	0
3	3	-0.2	2	1	0.3	1	0	0	0
3	3	-0.2	2	1	0.4	1	0	0	0
3	3	-0.2	2	1	0.5	1	0	0	0
3	3	-0.2	2	2	0	1	0	0	0
3	3	-0.2	2	2	0.1	1	0	0	0
3	3	-0.2	2	2	0.2	1	0	0	0
3	3	-0.2	2	2	0.3	1	0	0	0
3	3	-0.2	2	2	0.4	1	0	0	0
3	3	-0.2	2	2	0.5	1	0	0	0
3	3	-0.2	2	3	0	1	6.97452	0.79994	1
3	3	-0.2	2	3	0.1	1	7.24698	0.39998	1
3	3	-0.2	2	3	0.2	1	0	0	0
3	3	-0.2	2	3	0.3	1	0	0	0
3	3	-0.2	2	3	0.4	1	0	0	0
3	3	-0.2	2	3	0.5	1	0	0	0
3	3	-0.2	3	1	0	1	0	0	0
3	3	-0.2	3	1	0.1	1	0	0	0
3	3	-0.2	3	1	0.2	1	0	0	0
3	3	-0.2	3	1	0.3	1	0	0	0
3	3	-0.2	3	1	0.4	1	0	0	0
3	3	-0.2	3	1	0.5	1	0	0	0
3	3	-0.2	3	2	0	1	0	0	0
3	3	-0.2	3	2	0.1	1	0	0	0
3	3	-0.2	3	2	0.2	1	0	0	0
3	3	-0.2	3	2	0.3	1	0	0	0
3	3	-0.2	3	2	0.4	1	0	0	0
3	3	-0.2	3	2	0.5	1	0	0	0
3	3	-0.2	3	3	0	1	7.0357	0.89993	1
3	3	-0.2	3	3	0.1	1	6.97452	0.79994	1
3	3	-0.2	3	3	0.2	1	7.24698	0.39998	1
3	3	-0.2	3	3	0.3	1	0	0	0
3	3	-0.2	3	3	0.4	1	0	0	0
3	3	-0.2	3	3	0.5	1	0	0	0
3	3	-0.1	1	1	0	1	0	0	0
3	3	-0.1	1	1	0.1	1	0	0	0
3	3	-0.1	1	1	0.2	1	0	0	0
3	3	-0.1	1	1	0.3	1	0	0	0
3	3	-0.1	1	1	0.4	1	0	0	0
3	3	-0.1	1	1	0.5	1	0	0	0
3	3	-0.1	1	2	0	1	0	0	0
3	3	-0.1	1	2	0.1	1	0	0	0
3	3	-0.1	1	2	0.2	1	0	0	0
3	3	-0.1	1	2	0.3	1	0	0	0
3	3	-0.1	1	2	0.4	1	0	0	0
3	3	-0.1	1	2	0.5	1	0	0	0
3	3	-0.1	1	3	0	1	7.03691	0.99987	1
3	3	-0.1	1	3	0.1	1	7.0357	0.89993	1
3	3	-0.1	1	3	0.2	1	7.24698	0.39998	1
3	3	-0.1	1	3	0.3	1	0	0	0
3	3	-0.1	1	3	0.4	1	0	0	0
3	3	-0.1	1	3	0.5	1	0	0	0
3	3	-0.1	2	1	0	1	0	0	0
3	3	-0.1	2	1	0.1	1	0	0	0
3	3	-0.1	2	1	0.2	1	0	0	0
3	3	-0.1	2	1	0.3	1	0	0	0
3	3	-0.1	2	1	0.4	1	0	0	0
3	3	-0.1	2	1	0.5	1	0	0	0
3	3	-0.1	2	2	0	1	7.24698	0.39998	1
3	3	-0.1	2	2	0.1	1	0	0	0
3	3	-0.1	2	2	0.2	1	0	0	0
3	3	-0.1	2	2	0.3	1	0	0	0
3	3	-0.1	2	2	0.4	1	0	0	0
3	3	-0.1	2	2	0.5	1	0	0	0
3	3	-0.1	2	3	0	1	7.03691	0.99987	1
3	3	-0.1	2	3	0.1	1	7.03691	0.99987	1
3	3	-0.1	2	3	0.2	1	6.97452	0.79994	1
3	3	-0.1	2	3	0.3	1	7.24698	0.39998	1
3	3	-0.1	2	3	0.4	1	0	0	0
3	3	-0.1	2	3	0.5	1	0	0	0
3	3	-0.1	3	1	0	1	0	0	0
3	3	-0.1	3	1	0.1	1	0	0	0
3	3	-0.1	3	1	0.2	1	0	0	0
3	3	-0.1	3	1	0.3	1	0	0	0
3	3	-0.1	3	1	0.4	1	0	0	0
3	3	-0.1	3	1	0.5	1	0	0	0
3	3	-0.1	3	2	0	1	6.97452	0.79994	1
3	3	-0.1	3	2	0.1	1	7.24698	0.39998	1
3	3	-0.1	3	2	0.2	1	0	0	0
3	3	-0.1	3	2	0.3	1	0	0	0
3	3	-0.1	3	2	0.4	1	0	0	0
3	3	-0.1	3	2	0.5	1	0	0	0
3	3	-0.1	3	3	0	1	7.07781	1.09992	1
3	3	-0.1	3	3	0.1	1	7.03691	0.99987	1
3	3	-0.1	3	3	0.2	1	7.0357	0.89993	1
3	3	-0.1	3	3	0.3	1	7.24698	0.39998	1
3	3	-0.1	3	3	0.4	1	0	0	0
3	3	-0.1	3	3	0.5	1	0	0	0
3	3	0	1	1	0	1	0	0	0
3	3	0	1	1	0.1	1	0	0	0
3	3	0	1	1	0.2	1	0	0	0
3	3	0	1	1	0.3	1	0	0	0
3	3	0	1	1	0.4	1	0	0	0
3	3	0	1	1	0.5	1	0	0	0
3	3	0	1	2	0	1	6.97452	0.79994	1
3	3	0	1	2	0.1	1	7.24698	0.39998	1
3	3	0	1	2	0.2	1	7.24698	0.39998	1
3	3	0	1	2	0.3	1	0	0	0
3	3	0	1	2	0.4	1	0	0	0
3	3	0	1	2	0.5	1	0	0	0
3	3	0	1	3	0	1	7.07781	1.09992	1
3	3	0	1	3	0.1	1	7.03691	0.99987	1
3	3	0	1	3	0.2	1	7.03691	0.99987	1
3	3	0	1	3	0.3	1	6.97452	0.79994	1
3	3	0	1	3	0.4	1	7.24698	0.39998	1
3	3	0	1	3	0.5	1	0	0	0
3	3	0	2	1	0	1	0	0	0
3	3	0	2	1	0.1	1	0	0	0
3	3	0	2	1	0.2	1	0	0	0
3	3	0	2	1	0.3	1	0	0	0
3	3	0	2	1	0.4	1	0	0	0
3	3	0	2	1	0.5	1	0	0	0
3	3	0	2	2	0	1	7.0357	0.89993	1
3	3	0	2	2	0.1	1	7.0357	0.89993	1
3	3	0	2	2	0.2	1	7.24698	0.39998	1
3	3	0	2	2	0.3	1	7.24698	0.39998	1
3	3	0	2	2	0.4	1	0	0	0
3	3	0	2	2	0.5	1	0	0	0
3	3	0	2	3	0	1	7.30042	1.19992	1
3	3	0	2	3	0.1	1	7.07781	1.09992	1
3	3	0	2	3	0.2	1	7.03691	0.99987	1
3	3	0	2	3	0.3	1	7.0357	0.89993	1
3	3	0	2	3	0.4	1	7.24698	0.39998	1
3	3	0	2	3	0.5	1	0	0	0
3	3	0	3	1	0	1	7.24698	0.39998	1
3	3	0	3	1	0.1	1	0	0	0
3	3	0	3	1	0.2	1	0	0	0
3	3	0	3	1	0.3	1	0	0	0
3	3	0	3	1	0.4	1	0	0	0
3	3	0	3	1	0.5	1	0	0	0
3	3	0	3	2	0	1	7.03691	0.99987	1
3	3	0	3	2	0.1	1	7.0357	0.89993	1
3	3	0	3	2	0.2	1	6.97452	0.79994	1
3	3	0	3	2	0.3	1	7.24698	0.39998	1
3	3	0	3	2	0.4	1	0	0	0
3	3	0	3	2	0.5	1	0	0	0
3	3	0	3	3	0	1	7.49921	1.29994	1
3	3	0	3	3	0.1	1	7.30042	1.19992	1
3	3	0	3	3	0.2	1	7.07781	1.09992	1
3	3	0	3	3	0.3	1	7.03691	0.99987	1
3	3	0	3	3	0.4	1	7.0357	0.89993	1
3	3	0	3	3	0.5	1	7.24698	0.39998	1
3	3	0.1	1	1	0	1	7.24698	0.39998	1
3	3	0.1	1	1	0.1	1	0	0	0
3	3	0.1	1	1	0.2	1	0	0	0
3	3	0.1	1	1	0.3	1	0	0	0
3	3	0.1	1	1	0.4	1	0	0	0
3	3	0.1	1	1	0.5	1	0	0	0
3	3	0.1	1	2	0	1	7.03691	0.99987	1
3	3	0.1	1	2	0.1	1	7.03691	0.99987	1
3	3	0.1	1	2	0.2	1	7.0357	0.89993	1
3	3	0.1	1	2	0.3	1	7.24698	0.39998	1
3	3	0.1	1	2	0.4	1	7.24698	0.39998	1
3	3	0.1	1	2	0.5	1	0	0	0
3	3	0.1	1	3	0	1	7.49921	1.29994	1
3	3	0.1	1	3	0.1	1	7.30042	1.19992	1
3	3	0.1	1	3	0.2	1	7.07781	1.09992	1
3	3	0.1	1	3	0.3	1	7.03691	0.99987	1
3	3	0.1	1	3	0.4	1	7.0357	0.89993	1
3	3	0.1	1	3	0.5	1	7.0554	0.59995	1
3	3	0.1	2	1	0	1	7.24698	0.39998	1
3	3	0.1	2	1	0.1	1	7.24698	0.39998	1
3	3	0.1	2	1	0.2	1	0	0	0
3	3	0.1	2	1	0.3	1	0	0	0
3	3	0.1	2	1	0.4	1	0	0	0
3	3	0.1	2	1	0.5	1	0	0	0
3	3	0.1	2	2	0	1	7.07781	1.09992	1
3	3	0.1	2	2	0.1	1	7.03691	0.99987	1
3	3	0.1	2	2	0.2	1	7.0357	0.89993	1
3	3	0.1	2	2	0.3	1	7.0357	0.89993	1
3	3	0.1	2	2	0.4	1	7.24698	0.39998	1
3	3	0.1	2	2	0.5	1	7.24698	0.39998	1
3	3	0.1	2	3	0	1	7.61321	1.39991	1
3	3	0.1	2	3	0.1	1	7.49921	1.29994	1
3	3	0.1	2	3	0.2	1	7.30042	1.19992	1
3	3	0.1	2	3	0.3	1	7.07781	1.09992	1
3	3	0.1	2	3	0.4	1	7.03691	0.99987	1
3	3	0.1	2	3	0.5	1	7.0357	0.89993	1
3	3	0.1	3	1	0	1	7.0357	0.89993	1
3	3	0.1	3	1	0.1	1	7.0554	0.59995	1
3	3	0.1	3	1	0.2	1	7.24698	0.39998	1
3	3	0.1	3	1	0.3	1	7.24698	0.39998	1
3	3	0.1	3	1	0.4	1	0	0	0
3	3	0.1	3	1	0.5	1	0	0	0
3	3	0.1	3	2	0	1	7.30042	1.19992	1
3	3	0.1	3	2	0.1	1	7.07781	1.09992	1
3	3	0.1	3	2	0.2	1	7.03691	0.99987	1
3	3	0.1	3	2	0.3	1	7.0357	0.89993	1
3	3	0.1	3	2	0.4	1	6.97452	0.79994	1
3	3	0.1	3	2	0.5	1	7.24698	0.39998	1
3	3	0.1	3	3	0	1	7.64757	1.49991	1
3	3	0.1	3	3	0.1	1	7.61321	1.39991	1
3	3	0.1	3	3	0.2	1	7.49921	1.29994	1
3	3	0.1	3	3	0.3	1	7.07781	1.09992	1
3	3	0.1	3	3	0.4	1	7.03691	0.99987	1
3	3	0.1	3	3	0.5	1	7.0357	0.89993	1
3	3	0.2	1	1	0	1	6.97452	0.79994	1
3	3	0.2	1	1	0.1	1	7.24698	0.39998	1
3	3	0.2	1	1	0.2	1	7.24698	0.39998	1
3	3	0.2	1	1	0.3	1	7.24698	0.39998	1
3	3	0.2	1	1	0.4	1	0	0	0
3	3	0.2	1	1	0.5	1	0	0	0
3	3	0.2	1	2	0	1	7.30042	1.19992	1
3	3	0.2	1	2	0.1	1	7.07781	1.09992	1
3	3	0.2	1	2	0.2	1	7.03691	0.99987	1
3	3	0.2	1	2	0.3	1	7.03691	0.99987	1
3	3	0.2	1	2	0.4	1	7.0357	0.89993	1
3	3	0.2	1	2	0.5	1	7.24698	0.39998	1
3	3	0.2	1	3	0	1	7.64757	1.49991	1
3	3	0.2	1	3	0.1	1	7.61321	1.39991	1
3	3	0.2	1	3	0.2	1	7.49921	1.29994	1
3	3	0.2	1	3	0.3	1	7.30042	1.19992	1
3	3	0.2	1	3	0.4	1	7.03691	0.99987	1
3	3	0.2	1	3	0.5	1	7.03691	0.99987	1
3	3	0.2	2	1	0	1	7.0357	0.89993	1
3	3	0.2	2	1	0.1	1	7.0357	0.89993	1
3	3	0.2	2	1	0.2	1	7.0554	0.59995	1
3	3	0.2	2	1	0.3	1	7.24698	0.39998	1
3	3	0.2	2	1	0.4	1	7.24698	0.39998	1
3	3	0.2	2	1	0.5	1	0	0	0
3	3	0.2	2	2	0	1	7.30042	1.19992	1
3	3	0.2	2	2	0.1	1	7.30042	1.19992	1
3	3	0.2	2	2	0.2	1	7.07781	1.09992	1
3	3	0.2	2	2	0.3	1	7.03691	0.99987	1
3	3	0.2	2	2	0.4	1	7.0357	0.89993	1
3	3	0.2	2	2	0.5	1	6.97452	0.79994	1
3	3	0.2	2	3	0	1	7.85943	1.59991	1
3	3	0.2	2	3	0.1	1	7.61321	1.39991	1
3	3	0.2	2	3	0.2	1	7.49921	1.29994	1
3	3	0.2	2	3	0.3	1	7.30042	1.19992	1
3	3	0.2	2	3	0.4	1	7.07781	1.09992	1
3	3	0.2	2	3	0.5	1	7.03691	0.99987	1
3	3	0.2	3	1	0	1	7.03691	0.99987	1
3	3	0.2	3	1	0.1	1	7.0357	0.89993	1
3	3	0.2	3	1	0.2	1	7.0357	0.89993	1
3	3	0.2	3	1	0.3	1	6.97452	0.79994	1
3	3	0.2	3	1	0.4	1	7.24698	0.39998	1
3	3	0.2	3	1	0.5	1	7.24698	0.39998	1
3	3	0.2	3	2	0	1	7.49921	1.29994	1
3	3	0.2	3	2	0.1	1	7.30042	1.19992	1
3	3	0.2	3	2	0.2	1	7.07781	1.09992	1
3	3	0.2	3	2	0.3	1	7.03691	0.99987	1
3	3	0.2	3	2	0.4	1	7.03691	0.99987	1
3	3	0.2	3	2	0.5	1	7.0357	0.89993	1
3	3	0.2	3	3	0	1	8.05471	1.69988	1
3	3	0.2	3	3	0.1	1	7.64757	1.49991	1
3	3	0.2	3	3	0.2	1	7.61321	1.39991	1
3	3	0.2	3	3	0.3	1	7.49921	1.29994	1
3	3	0.2	3	3	0.4	1	7.30042	1.19992	1
3	3	0.2	3	3	0.5	1	7.03691	0.99987	1
3	3	0.2	3	3	0.1	1	7.64757	0	1
3	3	0.2	3	3	0.2	1	7.61321	0	1
3	3	0.2	3	3	0.3	1	7.49921	0	1
3	3	0.2	3	3	0.4	1	7.30042	0	1
3	3	0.2	3	3	0.5	1	7.03691	0.99987	1
3	3	0.2	3	3	0.4	1	7.30042	0.3	1
3	3	0.2	3	3	0.5	1	7.03691	0.3	1
3	1	-0.2	1	1	0	2	0	0	0
3	1	-0.2	1	1	0.1	2	0	0	0
3	1	-0.2	1	1	0.2	2	0	0	0
3	1	-0.2	1	1	0.3	2	0	0	0
3	1	-0.2	1	1	0.4	2	0	0	0
3	1	-0.2	1	1	0.5	2	0	0	0
3	1	-0.2	1	2	0	2	0	0	0
3	1	-0.2	1	2	0.1	2	0	0	0
3	1	-0.2	1	2	0.2	2	0	0	0
3	1	-0.2	1	2	0.3	2	0	0	0
3	1	-0.2	1	2	0.4	2	0	0	0
3	1	-0.2	1	2	0.5	2	0	0	0
3	1	-0.2	1	3	0	2	0	0	0
3	1	-0.2	1	3	0.1	2	0	0	0
3	1	-0.2	1	3	0.2	2	0	0	0
3	1	-0.2	1	3	0.3	2	0	0	0
3	1	-0.2	1	3	0.4	2	0	0	0
3	1	-0.2	1	3	0.5	2	0	0	0
3	1	-0.2	2	1	0	2	0	0	0
3	1	-0.2	2	1	0.1	2	0	0	0
3	1	-0.2	2	1	0.2	2	0	0	0
3	1	-0.2	2	1	0.3	2	0	0	0
3	1	-0.2	2	1	0.4	2	0	0	0
3	1	-0.2	2	1	0.5	2	0	0	0
3	1	-0.2	2	2	0	2	0	0	0
3	1	-0.2	2	2	0.1	2	0	0	0
3	1	-0.2	2	2	0.2	2	0	0	0
3	1	-0.2	2	2	0.3	2	0	0	0
3	1	-0.2	2	2	0.4	2	0	0	0
3	1	-0.2	2	2	0.5	2	0	0	0
3	1	-0.2	2	3	0	2	0	0	0
3	1	-0.2	2	3	0.1	2	0	0	0
3	1	-0.2	2	3	0.2	2	0	0	0
3	1	-0.2	2	3	0.3	2	0	0	0
3	1	-0.2	2	3	0.4	2	0	0	0
3	1	-0.2	2	3	0.5	2	0	0	0
3	1	-0.2	3	1	0	2	0	0	0
3	1	-0.2	3	1	0.1	2	0	0	0
3	1	-0.2	3	1	0.2	2	0	0	0
3	1	-0.2	3	1	0.3	2	0	0	0
3	1	-0.2	3	1	0.4	2	0	0	0
3	1	-0.2	3	1	0.5	2	0	0	0
3	1	-0.2	3	2	0	2	0	0	0
3	1	-0.2	3	2	0.1	2	0	0	0
3	1	-0.2	3	2	0.2	2	0	0	0
3	1	-0.2	3	2	0.3	2	0	0	0
3	1	-0.2	3	2	0.4	2	0	0	0
3	1	-0.2	3	2	0.5	2	0	0	0
3	1	-0.2	3	3	0	2	0	0	0
3	1	-0.2	3	3	0.1	2	0	0	0
3	1	-0.2	3	3	0.2	2	0	0	0
3	1	-0.2	3	3	0.3	2	0	0	0
3	1	-0.2	3	3	0.4	2	0	0	0
3	1	-0.2	3	3	0.5	2	0	0	0
3	1	-0.1	1	1	0	2	0	0	0
3	1	-0.1	1	1	0.1	2	0	0	0
3	1	-0.1	1	1	0.2	2	0	0	0
3	1	-0.1	1	1	0.3	2	0	0	0
3	1	-0.1	1	1	0.4	2	0	0	0
3	1	-0.1	1	1	0.5	2	0	0	0
3	1	-0.1	1	2	0	2	0	0	0
3	1	-0.1	1	2	0.1	2	0	0	0
3	1	-0.1	1	2	0.2	2	0	0	0
3	1	-0.1	1	2	0.3	2	0	0	0
3	1	-0.1	1	2	0.4	2	0	0	0
3	1	-0.1	1	2	0.5	2	0	0	0
3	1	-0.1	1	3	0	2	0	0	0
3	1	-0.1	1	3	0.1	2	0	0	0
3	1	-0.1	1	3	0.2	2	0	0	0
3	1	-0.1	1	3	0.3	2	0	0	0
3	1	-0.1	1	3	0.4	2	0	0	0
3	1	-0.1	1	3	0.5	2	0	0	0
3	1	-0.1	2	1	0	2	0	0	0
3	1	-0.1	2	1	0.1	2	0	0	0
3	1	-0.1	2	1	0.2	2	0	0	0
3	1	-0.1	2	1	0.3	2	0	0	0
3	1	-0.1	2	1	0.4	2	0	0	0
3	1	-0.1	2	1	0.5	2	0	0	0
3	1	-0.1	2	2	0	2	0	0	0
3	1	-0.1	2	2	0.1	2	0	0	0
3	1	-0.1	2	2	0.2	2	0	0	0
3	1	-0.1	2	2	0.3	2	0	0	0
3	1	-0.1	2	2	0.4	2	0	0	0
3	1	-0.1	2	2	0.5	2	0	0	0
3	1	-0.1	2	3	0	2	0	0	0
3	1	-0.1	2	3	0.1	2	0	0	0
3	1	-0.1	2	3	0.2	2	0	0	0
3	1	-0.1	2	3	0.3	2	0	0	0
3	1	-0.1	2	3	0.4	2	0	0	0
3	1	-0.1	2	3	0.5	2	0	0	0
3	1	-0.1	3	1	0	2	0	0	0
3	1	-0.1	3	1	0.1	2	0	0	0
3	1	-0.1	3	1	0.2	2	0	0	0
3	1	-0.1	3	1	0.3	2	0	0	0
3	1	-0.1	3	1	0.4	2	0	0	0
3	1	-0.1	3	1	0.5	2	0	0	0
3	1	-0.1	3	2	0	2	0	0	0
3	1	-0.1	3	2	0.1	2	0	0	0
3	1	-0.1	3	2	0.2	2	0	0	0
3	1	-0.1	3	2	0.3	2	0	0	0
3	1	-0.1	3	2	0.4	2	0	0	0
3	1	-0.1	3	2	0.5	2	0	0	0
3	1	-0.1	3	3	0	2	0	0	0
3	1	-0.1	3	3	0.1	2	0	0	0
3	1	-0.1	3	3	0.2	2	0	0	0
3	1	-0.1	3	3	0.3	2	0	0	0
3	1	-0.1	3	3	0.4	2	0	0	0
3	1	-0.1	3	3	0.5	2	0	0	0
3	1	0	1	1	0	2	0	0	0
3	1	0	1	1	0.1	2	0	0	0
3	1	0	1	1	0.2	2	0	0	0
3	1	0	1	1	0.3	2	0	0	0
3	1	0	1	1	0.4	2	0	0	0
3	1	0	1	1	0.5	2	0	0	0
3	1	0	1	2	0	2	0	0	0
3	1	0	1	2	0.1	2	0	0	0
3	1	0	1	2	0.2	2	0	0	0
3	1	0	1	2	0.3	2	0	0	0
3	1	0	1	2	0.4	2	0	0	0
3	1	0	1	2	0.5	2	0	0	0
3	1	0	1	3	0	2	0	0	0
3	1	0	1	3	0.1	2	0	0	0
3	1	0	1	3	0.2	2	0	0	0
3	1	0	1	3	0.3	2	0	0	0
3	1	0	1	3	0.4	2	0	0	0
3	1	0	1	3	0.5	2	0	0	0
3	1	0	2	1	0	2	0	0	0
3	1	0	2	1	0.1	2	0	0	0
3	1	0	2	1	0.2	2	0	0	0
3	1	0	2	1	0.3	2	0	0	0
3	1	0	2	1	0.4	2	0	0	0
3	1	0	2	1	0.5	2	0	0	0
3	1	0	2	2	0	2	0	0	0
3	1	0	2	2	0.1	2	0	0	0
3	1	0	2	2	0.2	2	0	0	0
3	1	0	2	2	0.3	2	0	0	0
3	1	0	2	2	0.4	2	0	0	0
3	1	0	2	2	0.5	2	0	0	0
3	1	0	2	3	0	2	0	0	0
3	1	0	2	3	0.1	2	0	0	0
3	1	0	2	3	0.2	2	0	0	0
3	1	0	2	3	0.3	2	0	0	0
3	1	0	2	3	0.4	2	0	0	0
3	1	0	2	3	0.5	2	0	0	0
3	1	0	3	1	0	2	0	0	0
3	1	0	3	1	0.1	2	0	0	0
3	1	0	3	1	0.2	2	0	0	0
3	1	0	3	1	0.3	2	0	0	0
3	1	0	3	1	0.4	2	0	0	0
3	1	0	3	1	0.5	2	0	0	0
3	1	0	3	2	0	2	0	0	0
3	1	0	3	2	0.1	2	0	0	0
3	1	0	3	2	0.2	2	0	0	0
3	1	0	3	2	0.3	2	0	0	0
3	1	0	3	2	0.4	2	0	0	0
3	1	0	3	2	0.5	2	0	0	0
3	1	0	3	3	0	2	-1.59755	1.19992	1
3	1	0	3	3	0.1	2	0	0	0
3	1	0	3	3	0.2	2	0	0	0
3	1	0	3	3	0.3	2	0	0	0
3	1	0	3	3	0.4	2	0	0	0
3	1	0	3	3	0.5	2	0	0	0
3	1	0.1	1	1	0	2	0	0	0
3	1	0.1	1	1	0.1	2	0	0	0
3	1	0.1	1	1	0.2	2	0	0	0
3	1	0.1	1	1	0.3	2	0	0	0
3	1	0.1	1	1	0.4	2	0	0	0
3	1	0.1	1	1	0.5	2	0	0	0
3	1	0.1	1	2	0	2	0	0	0
3	1	0.1	1	2	0.1	2	0	0	0
3	1	0.1	1	2	0.2	2	0	0	0
3	1	0.1	1	2	0.3	2	0	0	0
3	1	0.1	1	2	0.4	2	0	0	0
3	1	0.1	1	2	0.5	2	0	0	0
3	1	0.1	1	3	0	2	0	0	0
3	1	0.1	1	3	0.1	2	0	0	0
3	1	0.1	1	3	0.2	2	0	0	0
3	1	0.1	1	3	0.3	2	0	0	0
3	1	0.1	1	3	0.4	2	0	0	0
3	1	0.1	1	3	0.5	2	0	0	0
3	1	0.1	2	1	0	2	0	0	0
3	1	0.1	2	1	0.1	2	0	0	0
3	1	0.1	2	1	0.2	2	0	0	0
3	1	0.1	2	1	0.3	2	0	0	0
3	1	0.1	2	1	0.4	2	0	0	0
3	1	0.1	2	1	0.5	2	0	0	0
3	1	0.1	2	2	0	2	0	0	0
3	1	0.1	2	2	0.1	2	0	0	0
3	1	0.1	2	2	0.2	2	0	0	0
3	1	0.1	2	2	0.3	2	0	0	0
3	1	0.1	2	2	0.4	2	0	0	0
3	1	0.1	2	2	0.5	2	0	0	0
3	1	0.1	2	3	0	2	-0.998579	1.99987	1
3	1	0.1	2	3	0.1	2	0	0	0
3	1	0.1	2	3	0.2	2	0	0	0
3	1	0.1	2	3	0.3	2	0	0	0
3	1	0.1	2	3	0.4	2	0	0	0
3	1	0.1	2	3	0.5	2	0	0	0
3	1	0.1	3	1	0	2	0	0	0
3	1	0.1	3	1	0.1	2	0	0	0
3	1	0.1	3	1	0.2	2	0	0	0
3	1	0.1	3	1	0.3	2	0	0	0
3	1	0.1	3	1	0.4	2	0	0	0
3	1	0.1	3	1	0.5	2	0	0	0
3	1	0.1	3	2	0	2	0	0	0
3	1	0.1	3	2	0.1	2	0	0	0
3	1	0.1	3	2	0.2	2	0	0	0
3	1	0.1	3	2	0.3	2	0	0	0
3	1	0.1	3	2	0.4	2	0	0	0
3	1	0.1	3	2	0.5	2	0	0	0
3	1	0.1	3	3	0	2	-0.998579	2.09987	1
3	1	0.1	3	3	0.1	2	0	0	0
3	1	0.1	3	3	0.2	2	0	0	0
3	1	0.1	3	3	0.3	2	0	0	0
3	1	0.1	3	3	0.4	2	0	0	0
3	1	0.1	3	3	0.5	2	0	0	0
3	1	0.2	1	1	0	2	0	0	0
3	1	0.2	1	1	0.1	2	0	0	0
3	1	0.2	1	1	0.2	2	0	0	0
3	1	0.2	1	1	0.3	2	0	0	0
3	1	0.2	1	1	0.4	2	0	0	0
3	1	0.2	1	1	0.5	2	0	0	0
3	1	0.2	1	2	0	2	0	0	0
3	1	0.2	1	2	0.1	2	0	0	0
3	1	0.2	1	2	0.2	2	0	0	0
3	1	0.2	1	2	0.3	2	0	0	0
3	1	0.2	1	2	0.4	2	0	0	0
3	1	0.2	1	2	0.5	2	0	0	0
3	1	0.2	1	3	0	2	-0.998579	1.99987	1
3	1	0.2	1	3	0.1	2	0	0	0
3	1	0.2	1	3	0.2	2	0	0	0
3	1	0.2	1	3	0.3	2	0	0	0
3	1	0.2	1	3	0.4	2	0	0	0
3	1	0.2	1	3	0.5	2	0	0	0
3	1	0.2	2	1	0	2	0	0	0
3	1	0.2	2	1	0.1	2	0	0	0
3	1	0.2	2	1	0.2	2	0	0	0
3	1	0.2	2	1	0.3	2	0	0	0
3	1	0.2	2	1	0.4	2	0	0	0
3	1	0.2	2	1	0.5	2	0	0	0
3	1	0.2	2	2	0	2	0	0	0
3	1	0.2	2	2	0.1	2	0	0	0
3	1	0.2	2	2	0.2	2	0	0	0
3	1	0.2	2	2	0.3	2	0	0	0
3	1	0.2	2	2	0.4	2	0	0	0
3	1	0.2	2	2	0.5	2	0	0	0
3	1	0.2	2	3	0	2	-0.8898	2.39988	1
3	1	0.2	2	3	0.1	2	-1.59755	1.19992	1
3	1	0.2	2	3	0.2	2	0	0	0
3	1	0.2	2	3	0.3	2	0	0	0
3	1	0.2	2	3	0.4	2	0	0	0
3	1	0.2	2	3	0.5	2	0	0	0
3	1	0.2	3	1	0	2	0	0	0
3	1	0.2	3	1	0.1	2	0	0	0
3	1	0.2	3	1	0.2	2	0	0	0
3	1	0.2	3	1	0.3	2	0	0	0
3	1	0.2	3	1	0.4	2	0	0	0
3	1	0.2	3	1	0.5	2	0	0	0
3	1	0.2	3	2	0	2	0	0	0
3	1	0.2	3	2	0.1	2	0	0	0
3	1	0.2	3	2	0.2	2	0	0	0
3	1	0.2	3	2	0.3	2	0	0	0
3	1	0.2	3	2	0.4	2	0	0	0
3	1	0.2	3	2	0.5	2	0	0	0
3	1	0.2	3	3	0	2	-0.583055	2.59981	1
3	1	0.2	3	3	0.1	2	-0.998579	1.99987	1
3	1	0.2	3	3	0.2	2	0	0	0
3	1	0.2	3	3	0.3	2	0	0	0
3	1	0.2	3	3	0.4	2	0	0	0
3	1	0.2	3	3	0.5	2	0	0	0
3	2	-0.2	1	1	0	2	0	0	0
3	2	-0.2	1	1	0.1	2	0	0	0
3	2	-0.2	1	1	0.2	2	0	0	0
3	2	-0.2	1	1	0.3	2	0	0	0
3	2	-0.2	1	1	0.4	2	0	0	0
3	2	-0.2	1	1	0.5	2	0	0	0
3	2	-0.2	1	2	0	2	-0.834709	1.99989	1
3	2	-0.2	1	2	0.1	2	-0.00781489	1.29993	1
3	2	-0.2	1	2	0.2	2	0	0	0
3	2	-0.2	1	2	0.3	2	0	0	0
3	2	-0.2	1	2	0.4	2	0	0	0
3	2	-0.2	1	2	0.5	2	0	0	0
3	2	-0.2	1	3	0	2	-0.995906	2.99983	1
3	2	-0.2	1	3	0.1	2	-1.06959	2.59987	1
3	2	-0.2	1	3	0.2	2	-0.974848	2.29989	1
3	2	-0.2	1	3	0.3	2	-0.834709	1.99989	1
3	2	-0.2	1	3	0.4	2	0	0	0
3	2	-0.2	1	3	0.5	2	0	0	0
3	2	-0.2	2	1	0	2	0	0	0
3	2	-0.2	2	1	0.1	2	0	0	0
3	2	-0.2	2	1	0.2	2	0	0	0
3	2	-0.2	2	1	0.3	2	0	0	0
3	2	-0.2	2	1	0.4	2	0	0	0
3	2	-0.2	2	1	0.5	2	0	0	0
3	2	-0.2	2	2	0	2	-0.974848	2.19987	1
3	2	-0.2	2	2	0.1	2	-0.834709	2.09988	1
3	2	-0.2	2	2	0.2	2	-0.00781489	1.29993	1
3	2	-0.2	2	2	0.3	2	0	0	0
3	2	-0.2	2	2	0.4	2	0	0	0
3	2	-0.2	2	2	0.5	2	0	0	0
3	2	-0.2	2	3	0	2	1.02413	3.99974	1
3	2	-0.2	2	3	0.1	2	-0.995906	2.99983	1
3	2	-0.2	2	3	0.2	2	-1.06959	2.59987	1
3	2	-0.2	2	3	0.3	2	-0.974848	2.19987	1
3	2	-0.2	2	3	0.4	2	-0.00781489	1.29993	1
3	2	-0.2	2	3	0.5	2	0	0	0
3	2	-0.2	3	1	0	2	0	0	0
3	2	-0.2	3	1	0.1	2	0	0	0
3	2	-0.2	3	1	0.2	2	0	0	0
3	2	-0.2	3	1	0.3	2	0	0	0
3	2	-0.2	3	1	0.4	2	0	0	0
3	2	-0.2	3	1	0.5	2	0	0	0
3	2	-0.2	3	2	0	2	-0.974848	2.29989	1
3	2	-0.2	3	2	0.1	2	-0.974848	2.19987	1
3	2	-0.2	3	2	0.2	2	-0.00781489	1.39993	1
3	2	-0.2	3	2	0.3	2	-0.00781489	1.29993	1
3	2	-0.2	3	2	0.4	2	0	0	0
3	2	-0.2	3	2	0.5	2	0	0	0
3	2	-0.2	3	3	0	2	1.39144	4.09969	1
3	2	-0.2	3	3	0.1	2	-1.00717	3.19724	1
3	2	-0.2	3	3	0.2	2	-1.06959	2.79985	1
3	2	-0.2	3	3	0.3	2	-0.974848	2.29989	1
3	2	-0.2	3	3	0.4	2	-0.834709	2.09988	1
3	2	-0.2	3	3	0.5	2	0	0	0
3	2	-0.1	1	1	0	2	0	0	0
3	2	-0.1	1	1	0.1	2	0	0	0
3	2	-0.1	1	1	0.2	2	0	0	0
3	2	-0.1	1	1	0.3	2	0	0	0
3	2	-0.1	1	1	0.4	2	0	0	0
3	2	-0.1	1	1	0.5	2	0	0	0
3	2	-0.1	1	2	0	2	-0.974848	2.19987	1
3	2	-0.1	1	2	0.1	2	-0.974848	1.99988	1
3	2	-0.1	1	2	0.2	2	-0.00781489	1.29993	1
3	2	-0.1	1	2	0.3	2	0	0	0
3	2	-0.1	1	2	0.4	2	0	0	0
3	2	-0.1	1	2	0.5	2	0	0	0
3	2	-0.1	1	3	0	2	1.39144	3.99971	1
3	2	-0.1	1	3	0.1	2	-0.995906	2.99983	1
3	2	-0.1	1	3	0.2	2	-1.06959	2.59987	1
3	2	-0.1	1	3	0.3	2	-0.974848	2.19987	1
3	2	-0.1	1	3	0.4	2	-0.834709	1.89989	1
3	2	-0.1	1	3	0.5	2	0	0	0
3	2	-0.1	2	1	0	2	0	0	0
3	2	-0.1	2	1	0.1	2	0	0	0
3	2	-0.1	2	1	0.2	2	0	0	0
3	2	-0.1	2	1	0.3	2	0	0	0
3	2	-0.1	2	1	0.4	2	0	0	0
3	2	-0.1	2	1	0.5	2	0	0	0
3	2	-0.1	2	2	0	2	-1.06959	2.59987	1
3	2	-0.1	2	2	0.1	2	-0.974848	2.19987	1
3	2	-0.1	2	2	0.2	2	-0.834709	1.89989	1
3	2	-0.1	2	2	0.3	2	-0.00781489	0.99993	1
3	2	-0.1	2	2	0.4	2	0	0	0
3	2	-0.1	2	2	0.5	2	0	0	0
3	2	-0.1	2	3	0	2	1.91563	4.19972	1
3	2	-0.1	2	3	0.1	2	1.02413	3.89976	1
3	2	-0.1	2	3	0.2	2	-0.995906	2.79985	1
3	2	-0.1	2	3	0.3	2	-1.06959	2.49985	1
3	2	-0.1	2	3	0.4	2	-0.974848	2.09988	1
3	2	-0.1	2	3	0.5	2	-0.00781489	0.99993	1
3	2	-0.1	3	1	0	2	-0.00781489	1.29993	1
3	2	-0.1	3	1	0.1	2	0	0	0
3	2	-0.1	3	1	0.2	2	0	0	0
3	2	-0.1	3	1	0.3	2	0	0	0
3	2	-0.1	3	1	0.4	2	0	0	0
3	2	-0.1	3	1	0.5	2	0	0	0
3	2	-0.1	3	2	0	2	-1.04459	2.69984	1
3	2	-0.1	3	2	0.1	2	-1.06959	2.59987	1
3	2	-0.1	3	2	0.2	2	-0.974848	2.19987	1
3	2	-0.1	3	2	0.3	2	-0.00781489	1.29993	1
3	2	-0.1	3	2	0.4	2	-0.00781489	0.99993	1
3	2	-0.1	3	2	0.5	2	0	0	0
[truncated: 438 more rows]

## Sheet: Flight 4
FLIGHT Nr.	Encounter	Braking time shift [s]	Position sigma multiplier	Velocity sigma multiplier	THS	FF case (0) / EE case (1) / FE case (2)	Distance with the considered braking [m]	DNT (maxT) [s]	Safe (0), Danger (1)
4	1	-0.2	1	1	0	0	0	0	0
4	1	-0.2	1	1	0.1	0	0	0	0
4	1	-0.2	1	1	0.2	0	0	0	0
4	1	-0.2	1	1	0.3	0	0	0	0
4	1	-0.2	1	1	0.4	0	0	0	0
4	1	-0.2	1	1	0.5	0	0	0	0
4	1	-0.2	1	2	0	0	0	0	0
4	1	-0.2	1	2	0.1	0	0	0	0
4	1	-0.2	1	2	0.2	0	0	0	0
4	1	-0.2	1	2	0.3	0	0	0	0
4	1	-0.2	1	2	0.4	0	0	0	0
4	1	-0.2	1	2	0.5	0	0	0	0
4	1	-0.2	1	3	0	0	0	0	0
4	1	-0.2	1	3	0.1	0	0	0	0
4	1	-0.2	1	3	0.2	0	0	0	0
4	1	-0.2	1	3	0.3	0	0	0	0
4	1	-0.2	1	3	0.4	0	0	0	0
4	1	-0.2	1	3	0.5	0	0	0	0
4	1	-0.2	2	1	0	0	0	0	0
4	1	-0.2	2	1	0.1	0	0	0	0
4	1	-0.2	2	1	0.2	0	0	0	0
4	1	-0.2	2	1	0.3	0	0	0	0
4	1	-0.2	2	1	0.4	0	0	0	0
4	1	-0.2	2	1	0.5	0	0	0	0
4	1	-0.2	2	2	0	0	0	0	0
4	1	-0.2	2	2	0.1	0	0	0	0
4	1	-0.2	2	2	0.2	0	0	0	0
4	1	-0.2	2	2	0.3	0	0	0	0
4	1	-0.2	2	2	0.4	0	0	0	0
4	1	-0.2	2	2	0.5	0	0	0	0
4	1	-0.2	2	3	0	0	0	0	0
4	1	-0.2	2	3	0.1	0	0	0	0
4	1	-0.2	2	3	0.2	0	0	0	0
4	1	-0.2	2	3	0.3	0	0	0	0
4	1	-0.2	2	3	0.4	0	0	0	0
4	1	-0.2	2	3	0.5	0	0	0	0
4	1	-0.2	3	1	0	0	0	0	0
4	1	-0.2	3	1	0.1	0	0	0	0
4	1	-0.2	3	1	0.2	0	0	0	0
4	1	-0.2	3	1	0.3	0	0	0	0
4	1	-0.2	3	1	0.4	0	0	0	0
4	1	-0.2	3	1	0.5	0	0	0	0
4	1	-0.2	3	2	0	0	0	0	0
4	1	-0.2	3	2	0.1	0	0	0	0
4	1	-0.2	3	2	0.2	0	0	0	0
4	1	-0.2	3	2	0.3	0	0	0	0
4	1	-0.2	3	2	0.4	0	0	0	0
4	1	-0.2	3	2	0.5	0	0	0	0
4	1	-0.2	3	3	0	0	0	0	0
4	1	-0.2	3	3	0.1	0	0	0	0
4	1	-0.2	3	3	0.2	0	0	0	0
4	1	-0.2	3	3	0.3	0	0	0	0
4	1	-0.2	3	3	0.4	0	0	0	0
4	1	-0.2	3	3	0.5	0	0	0	0
4	1	-0.1	1	1	0	0	0	0	0
4	1	-0.1	1	1	0.1	0	0	0	0
4	1	-0.1	1	1	0.2	0	0	0	0
4	1	-0.1	1	1	0.3	0	0	0	0
4	1	-0.1	1	1	0.4	0	0	0	0
4	1	-0.1	1	1	0.5	0	0	0	0
4	1	-0.1	1	2	0	0	0	0	0
4	1	-0.1	1	2	0.1	0	0	0	0
4	1	-0.1	1	2	0.2	0	0	0	0
4	1	-0.1	1	2	0.3	0	0	0	0
4	1	-0.1	1	2	0.4	0	0	0	0
4	1	-0.1	1	2	0.5	0	0	0	0
4	1	-0.1	1	3	0	0	0	0	0
4	1	-0.1	1	3	0.1	0	0	0	0
4	1	-0.1	1	3	0.2	0	0	0	0
4	1	-0.1	1	3	0.3	0	0	0	0
4	1	-0.1	1	3	0.4	0	0	0	0
4	1	-0.1	1	3	0.5	0	0	0	0
4	1	-0.1	2	1	0	0	0	0	0
4	1	-0.1	2	1	0.1	0	0	0	0
4	1	-0.1	2	1	0.2	0	0	0	0
4	1	-0.1	2	1	0.3	0	0	0	0
4	1	-0.1	2	1	0.4	0	0	0	0
4	1	-0.1	2	1	0.5	0	0	0	0
4	1	-0.1	2	2	0	0	0	0	0
4	1	-0.1	2	2	0.1	0	0	0	0
4	1	-0.1	2	2	0.2	0	0	0	0
4	1	-0.1	2	2	0.3	0	0	0	0
4	1	-0.1	2	2	0.4	0	0	0	0
4	1	-0.1	2	2	0.5	0	0	0	0
4	1	-0.1	2	3	0	0	0	0	0
4	1	-0.1	2	3	0.1	0	0	0	0
4	1	-0.1	2	3	0.2	0	0	0	0
4	1	-0.1	2	3	0.3	0	0	0	0
4	1	-0.1	2	3	0.4	0	0	0	0
4	1	-0.1	2	3	0.5	0	0	0	0
4	1	-0.1	3	1	0	0	0	0	0
4	1	-0.1	3	1	0.1	0	0	0	0
4	1	-0.1	3	1	0.2	0	0	0	0
4	1	-0.1	3	1	0.3	0	0	0	0
4	1	-0.1	3	1	0.4	0	0	0	0
4	1	-0.1	3	1	0.5	0	0	0	0
4	1	-0.1	3	2	0	0	0	0	0
4	1	-0.1	3	2	0.1	0	0	0	0
4	1	-0.1	3	2	0.2	0	0	0	0
4	1	-0.1	3	2	0.3	0	0	0	0
4	1	-0.1	3	2	0.4	0	0	0	0
4	1	-0.1	3	2	0.5	0	0	0	0
4	1	-0.1	3	3	0	0	0	0	0
4	1	-0.1	3	3	0.1	0	0	0	0
4	1	-0.1	3	3	0.2	0	0	0	0
4	1	-0.1	3	3	0.3	0	0	0	0
4	1	-0.1	3	3	0.4	0	0	0	0
4	1	-0.1	3	3	0.5	0	0	0	0
4	1	0	1	1	0	0	0	0	0
4	1	0	1	1	0.1	0	0	0	0
4	1	0	1	1	0.2	0	0	0	0
4	1	0	1	1	0.3	0	0	0	0
4	1	0	1	1	0.4	0	0	0	0
4	1	0	1	1	0.5	0	0	0	0
4	1	0	1	2	0	0	0	0	0
4	1	0	1	2	0.1	0	0	0	0
4	1	0	1	2	0.2	0	0	0	0
4	1	0	1	2	0.3	0	0	0	0
4	1	0	1	2	0.4	0	0	0	0
4	1	0	1	2	0.5	0	0	0	0
4	1	0	1	3	0	0	0	0	0
4	1	0	1	3	0.1	0	0	0	0
4	1	0	1	3	0.2	0	0	0	0
4	1	0	1	3	0.3	0	0	0	0
4	1	0	1	3	0.4	0	0	0	0
4	1	0	1	3	0.5	0	0	0	0
4	1	0	2	1	0	0	0	0	0
4	1	0	2	1	0.1	0	0	0	0
4	1	0	2	1	0.2	0	0	0	0
4	1	0	2	1	0.3	0	0	0	0
4	1	0	2	1	0.4	0	0	0	0
4	1	0	2	1	0.5	0	0	0	0
4	1	0	2	2	0	0	0	0	0
4	1	0	2	2	0.1	0	0	0	0
4	1	0	2	2	0.2	0	0	0	0
4	1	0	2	2	0.3	0	0	0	0
4	1	0	2	2	0.4	0	0	0	0
4	1	0	2	2	0.5	0	0	0	0
4	1	0	2	3	0	0	-3.2515	0.99997	1
4	1	0	2	3	0.1	0	0	0	0
4	1	0	2	3	0.2	0	0	0	0
4	1	0	2	3	0.3	0	0	0	0
4	1	0	2	3	0.4	0	0	0	0
4	1	0	2	3	0.5	0	0	0	0
4	1	0	3	1	0	0	0	0	0
4	1	0	3	1	0.1	0	0	0	0
4	1	0	3	1	0.2	0	0	0	0
4	1	0	3	1	0.3	0	0	0	0
4	1	0	3	1	0.4	0	0	0	0
4	1	0	3	1	0.5	0	0	0	0
4	1	0	3	2	0	0	0	0	0
4	1	0	3	2	0.1	0	0	0	0
4	1	0	3	2	0.2	0	0	0	0
4	1	0	3	2	0.3	0	0	0	0
4	1	0	3	2	0.4	0	0	0	0
4	1	0	3	2	0.5	0	0	0	0
4	1	0	3	3	0	0	-2.97141	1.49999	1
4	1	0	3	3	0.1	0	0	0	0
4	1	0	3	3	0.2	0	0	0	0
4	1	0	3	3	0.3	0	0	0	0
4	1	0	3	3	0.4	0	0	0	0
4	1	0	3	3	0.5	0	0	0	0
4	1	0.1	1	1	0	0	0	0	0
4	1	0.1	1	1	0.1	0	0	0	0
4	1	0.1	1	1	0.2	0	0	0	0
4	1	0.1	1	1	0.3	0	0	0	0
4	1	0.1	1	1	0.4	0	0	0	0
4	1	0.1	1	1	0.5	0	0	0	0
4	1	0.1	1	2	0	0	0	0	0
4	1	0.1	1	2	0.1	0	0	0	0
4	1	0.1	1	2	0.2	0	0	0	0
4	1	0.1	1	2	0.3	0	0	0	0
4	1	0.1	1	2	0.4	0	0	0	0
4	1	0.1	1	2	0.5	0	0	0	0
4	1	0.1	1	3	0	0	-2.97141	1.39998	1
4	1	0.1	1	3	0.1	0	0	0	0
4	1	0.1	1	3	0.2	0	0	0	0
4	1	0.1	1	3	0.3	0	0	0	0
4	1	0.1	1	3	0.4	0	0	0	0
4	1	0.1	1	3	0.5	0	0	0	0
4	1	0.1	2	1	0	0	0	0	0
4	1	0.1	2	1	0.1	0	0	0	0
4	1	0.1	2	1	0.2	0	0	0	0
4	1	0.1	2	1	0.3	0	0	0	0
4	1	0.1	2	1	0.4	0	0	0	0
4	1	0.1	2	1	0.5	0	0	0	0
4	1	0.1	2	2	0	0	0	0	0
4	1	0.1	2	2	0.1	0	0	0	0
4	1	0.1	2	2	0.2	0	0	0	0
4	1	0.1	2	2	0.3	0	0	0	0
4	1	0.1	2	2	0.4	0	0	0	0
4	1	0.1	2	2	0.5	0	0	0	0
4	1	0.1	2	3	0	0	-3.35732	1.59998	1
4	1	0.1	2	3	0.1	0	-3.2515	0.99997	1
4	1	0.1	2	3	0.2	0	0	0	0
4	1	0.1	2	3	0.3	0	0	0	0
4	1	0.1	2	3	0.4	0	0	0	0
4	1	0.1	2	3	0.5	0	0	0	0
4	1	0.1	3	1	0	0	0	0	0
4	1	0.1	3	1	0.1	0	0	0	0
4	1	0.1	3	1	0.2	0	0	0	0
4	1	0.1	3	1	0.3	0	0	0	0
4	1	0.1	3	1	0.4	0	0	0	0
4	1	0.1	3	1	0.5	0	0	0	0
4	1	0.1	3	2	0	0	0	0	0
4	1	0.1	3	2	0.1	0	0	0	0
4	1	0.1	3	2	0.2	0	0	0	0
4	1	0.1	3	2	0.3	0	0	0	0
4	1	0.1	3	2	0.4	0	0	0	0
4	1	0.1	3	2	0.5	0	0	0	0
4	1	0.1	3	3	0	0	-3.30893	1.69997	1
4	1	0.1	3	3	0.1	0	-2.97141	1.49999	1
4	1	0.1	3	3	0.2	0	0	0	0
4	1	0.1	3	3	0.3	0	0	0	0
4	1	0.1	3	3	0.4	0	0	0	0
4	1	0.1	3	3	0.5	0	0	0	0
4	1	0.2	1	1	0	0	0	0	0
4	1	0.2	1	1	0.1	0	0	0	0
4	1	0.2	1	1	0.2	0	0	0	0
4	1	0.2	1	1	0.3	0	0	0	0
4	1	0.2	1	1	0.4	0	0	0	0
4	1	0.2	1	1	0.5	0	0	0	0
4	1	0.2	1	2	0	0	0	0	0
4	1	0.2	1	2	0.1	0	0	0	0
4	1	0.2	1	2	0.2	0	0	0	0
4	1	0.2	1	2	0.3	0	0	0	0
4	1	0.2	1	2	0.4	0	0	0	0
4	1	0.2	1	2	0.5	0	0	0	0
4	1	0.2	1	3	0	0	-3.35732	1.59998	1
4	1	0.2	1	3	0.1	0	-2.84413	1.19998	1
4	1	0.2	1	3	0.2	0	0	0	0
4	1	0.2	1	3	0.3	0	0	0	0
4	1	0.2	1	3	0.4	0	0	0	0
4	1	0.2	1	3	0.5	0	0	0	0
4	1	0.2	2	1	0	0	0	0	0
4	1	0.2	2	1	0.1	0	0	0	0
4	1	0.2	2	1	0.2	0	0	0	0
4	1	0.2	2	1	0.3	0	0	0	0
4	1	0.2	2	1	0.4	0	0	0	0
4	1	0.2	2	1	0.5	0	0	0	0
4	1	0.2	2	2	0	0	0	0	0
4	1	0.2	2	2	0.1	0	0	0	0
4	1	0.2	2	2	0.2	0	0	0	0
4	1	0.2	2	2	0.3	0	0	0	0
4	1	0.2	2	2	0.4	0	0	0	0
4	1	0.2	2	2	0.5	0	0	0	0
4	1	0.2	2	3	0	0	-3.30893	1.79996	1
4	1	0.2	2	3	0.1	0	-2.97141	1.49999	1
4	1	0.2	2	3	0.2	0	-3.2515	0.99997	1
4	1	0.2	2	3	0.3	0	0	0	0
4	1	0.2	2	3	0.4	0	0	0	0
4	1	0.2	2	3	0.5	0	0	0	0
4	1	0.2	3	1	0	0	0	0	0
4	1	0.2	3	1	0.1	0	0	0	0
4	1	0.2	3	1	0.2	0	0	0	0
4	1	0.2	3	1	0.3	0	0	0	0
4	1	0.2	3	1	0.4	0	0	0	0
4	1	0.2	3	1	0.5	0	0	0	0
4	1	0.2	3	2	0	0	0	0	0
4	1	0.2	3	2	0.1	0	0	0	0
4	1	0.2	3	2	0.2	0	0	0	0
4	1	0.2	3	2	0.3	0	0	0	0
4	1	0.2	3	2	0.4	0	0	0	0
4	1	0.2	3	2	0.5	0	0	0	0
4	1	0.2	3	3	0	0	-3.54785	2.1	1
4	1	0.2	3	3	0.1	0	-3.35732	1.59998	1
4	1	0.2	3	3	0.2	0	-2.84413	1.19998	1
4	1	0.2	3	3	0.3	0	0	0	0
4	1	0.2	3	3	0.4	0	0	0	0
4	1	0.2	3	3	0.5	0	0	0	0
4	1	-0.2	1	1	0	1	0	0	0
4	1	-0.2	1	1	0.1	1	0	0	0
4	1	-0.2	1	1	0.2	1	0	0	0
4	1	-0.2	1	1	0.3	1	0	0	0
4	1	-0.2	1	1	0.4	1	0	0	0
4	1	-0.2	1	1	0.5	1	0	0	0
4	1	-0.2	1	2	0	1	0	0	0
4	1	-0.2	1	2	0.1	1	0	0	0
4	1	-0.2	1	2	0.2	1	0	0	0
4	1	-0.2	1	2	0.3	1	0	0	0
4	1	-0.2	1	2	0.4	1	0	0	0
4	1	-0.2	1	2	0.5	1	0	0	0
4	1	-0.2	1	3	0	1	0	0	0
4	1	-0.2	1	3	0.1	1	0	0	0
4	1	-0.2	1	3	0.2	1	0	0	0
4	1	-0.2	1	3	0.3	1	0	0	0
4	1	-0.2	1	3	0.4	1	0	0	0
4	1	-0.2	1	3	0.5	1	0	0	0
4	1	-0.2	2	1	0	1	0	0	0
4	1	-0.2	2	1	0.1	1	0	0	0
4	1	-0.2	2	1	0.2	1	0	0	0
4	1	-0.2	2	1	0.3	1	0	0	0
4	1	-0.2	2	1	0.4	1	0	0	0
4	1	-0.2	2	1	0.5	1	0	0	0
4	1	-0.2	2	2	0	1	0	0	0
4	1	-0.2	2	2	0.1	1	0	0	0
4	1	-0.2	2	2	0.2	1	0	0	0
4	1	-0.2	2	2	0.3	1	0	0	0
4	1	-0.2	2	2	0.4	1	0	0	0
4	1	-0.2	2	2	0.5	1	0	0	0
4	1	-0.2	2	3	0	1	0	0	0
4	1	-0.2	2	3	0.1	1	0	0	0
4	1	-0.2	2	3	0.2	1	0	0	0
4	1	-0.2	2	3	0.3	1	0	0	0
4	1	-0.2	2	3	0.4	1	0	0	0
4	1	-0.2	2	3	0.5	1	0	0	0
4	1	-0.2	3	1	0	1	0	0	0
4	1	-0.2	3	1	0.1	1	0	0	0
4	1	-0.2	3	1	0.2	1	0	0	0
4	1	-0.2	3	1	0.3	1	0	0	0
4	1	-0.2	3	1	0.4	1	0	0	0
4	1	-0.2	3	1	0.5	1	0	0	0
4	1	-0.2	3	2	0	1	0	0	0
4	1	-0.2	3	2	0.1	1	0	0	0
4	1	-0.2	3	2	0.2	1	0	0	0
4	1	-0.2	3	2	0.3	1	0	0	0
4	1	-0.2	3	2	0.4	1	0	0	0
4	1	-0.2	3	2	0.5	1	0	0	0
4	1	-0.2	3	3	0	1	0	0	0
4	1	-0.2	3	3	0.1	1	0	0	0
4	1	-0.2	3	3	0.2	1	0	0	0
4	1	-0.2	3	3	0.3	1	0	0	0
4	1	-0.2	3	3	0.4	1	0	0	0
4	1	-0.2	3	3	0.5	1	0	0	0
4	1	-0.1	1	1	0	1	0	0	0
4	1	-0.1	1	1	0.1	1	0	0	0
4	1	-0.1	1	1	0.2	1	0	0	0
4	1	-0.1	1	1	0.3	1	0	0	0
4	1	-0.1	1	1	0.4	1	0	0	0
4	1	-0.1	1	1	0.5	1	0	0	0
4	1	-0.1	1	2	0	1	0	0	0
4	1	-0.1	1	2	0.1	1	0	0	0
4	1	-0.1	1	2	0.2	1	0	0	0
4	1	-0.1	1	2	0.3	1	0	0	0
4	1	-0.1	1	2	0.4	1	0	0	0
4	1	-0.1	1	2	0.5	1	0	0	0
4	1	-0.1	1	3	0	1	0	0	0
4	1	-0.1	1	3	0.1	1	0	0	0
4	1	-0.1	1	3	0.2	1	0	0	0
4	1	-0.1	1	3	0.3	1	0	0	0
4	1	-0.1	1	3	0.4	1	0	0	0
4	1	-0.1	1	3	0.5	1	0	0	0
4	1	-0.1	2	1	0	1	0	0	0
4	1	-0.1	2	1	0.1	1	0	0	0
4	1	-0.1	2	1	0.2	1	0	0	0
4	1	-0.1	2	1	0.3	1	0	0	0
4	1	-0.1	2	1	0.4	1	0	0	0
4	1	-0.1	2	1	0.5	1	0	0	0
4	1	-0.1	2	2	0	1	0	0	0
4	1	-0.1	2	2	0.1	1	0	0	0
4	1	-0.1	2	2	0.2	1	0	0	0
4	1	-0.1	2	2	0.3	1	0	0	0
4	1	-0.1	2	2	0.4	1	0	0	0
4	1	-0.1	2	2	0.5	1	0	0	0
4	1	-0.1	2	3	0	1	0	0	0
4	1	-0.1	2	3	0.1	1	0	0	0
4	1	-0.1	2	3	0.2	1	0	0	0
4	1	-0.1	2	3	0.3	1	0	0	0
4	1	-0.1	2	3	0.4	1	0	0	0
4	1	-0.1	2	3	0.5	1	0	0	0
4	1	-0.1	3	1	0	1	0	0	0
4	1	-0.1	3	1	0.1	1	0	0	0
4	1	-0.1	3	1	0.2	1	0	0	0
4	1	-0.1	3	1	0.3	1	0	0	0
4	1	-0.1	3	1	0.4	1	0	0	0
4	1	-0.1	3	1	0.5	1	0	0	0
4	1	-0.1	3	2	0	1	0	0	0
4	1	-0.1	3	2	0.1	1	0	0	0
4	1	-0.1	3	2	0.2	1	0	0	0
4	1	-0.1	3	2	0.3	1	0	0	0
4	1	-0.1	3	2	0.4	1	0	0	0
4	1	-0.1	3	2	0.5	1	0	0	0
4	1	-0.1	3	3	0	1	0	0	0
4	1	-0.1	3	3	0.1	1	0	0	0
4	1	-0.1	3	3	0.2	1	0	0	0
4	1	-0.1	3	3	0.3	1	0	0	0
4	1	-0.1	3	3	0.4	1	0	0	0
4	1	-0.1	3	3	0.5	1	0	0	0
4	1	0	1	1	0	1	0	0	0
4	1	0	1	1	0.1	1	0	0	0
4	1	0	1	1	0.2	1	0	0	0
4	1	0	1	1	0.3	1	0	0	0
4	1	0	1	1	0.4	1	0	0	0
4	1	0	1	1	0.5	1	0	0	0
4	1	0	1	2	0	1	0	0	0
4	1	0	1	2	0.1	1	0	0	0
4	1	0	1	2	0.2	1	0	0	0
4	1	0	1	2	0.3	1	0	0	0
4	1	0	1	2	0.4	1	0	0	0
4	1	0	1	2	0.5	1	0	0	0
4	1	0	1	3	0	1	0	0	0
4	1	0	1	3	0.1	1	0	0	0
4	1	0	1	3	0.2	1	0	0	0
4	1	0	1	3	0.3	1	0	0	0
4	1	0	1	3	0.4	1	0	0	0
4	1	0	1	3	0.5	1	0	0	0
4	1	0	2	1	0	1	0	0	0
4	1	0	2	1	0.1	1	0	0	0
4	1	0	2	1	0.2	1	0	0	0
4	1	0	2	1	0.3	1	0	0	0
4	1	0	2	1	0.4	1	0	0	0
4	1	0	2	1	0.5	1	0	0	0
4	1	0	2	2	0	1	0	0	0
4	1	0	2	2	0.1	1	0	0	0
4	1	0	2	2	0.2	1	0	0	0
4	1	0	2	2	0.3	1	0	0	0
4	1	0	2	2	0.4	1	0	0	0
4	1	0	2	2	0.5	1	0	0	0
4	1	0	2	3	0	1	0	0	0
4	1	0	2	3	0.1	1	0	0	0
4	1	0	2	3	0.2	1	0	0	0
4	1	0	2	3	0.3	1	0	0	0
4	1	0	2	3	0.4	1	0	0	0
4	1	0	2	3	0.5	1	0	0	0
4	1	0	3	1	0	1	0	0	0
4	1	0	3	1	0.1	1	0	0	0
4	1	0	3	1	0.2	1	0	0	0
4	1	0	3	1	0.3	1	0	0	0
4	1	0	3	1	0.4	1	0	0	0
4	1	0	3	1	0.5	1	0	0	0
4	1	0	3	2	0	1	0	0	0
4	1	0	3	2	0.1	1	0	0	0
4	1	0	3	2	0.2	1	0	0	0
4	1	0	3	2	0.3	1	0	0	0
4	1	0	3	2	0.4	1	0	0	0
4	1	0	3	2	0.5	1	0	0	0
4	1	0	3	3	0	1	0	0	0
4	1	0	3	3	0.1	1	0	0	0
4	1	0	3	3	0.2	1	0	0	0
4	1	0	3	3	0.3	1	0	0	0
4	1	0	3	3	0.4	1	0	0	0
4	1	0	3	3	0.5	1	0	0	0
4	1	0.1	1	1	0	1	0	0	0
4	1	0.1	1	1	0.1	1	0	0	0
4	1	0.1	1	1	0.2	1	0	0	0
4	1	0.1	1	1	0.3	1	0	0	0
4	1	0.1	1	1	0.4	1	0	0	0
4	1	0.1	1	1	0.5	1	0	0	0
4	1	0.1	1	2	0	1	0	0	0
4	1	0.1	1	2	0.1	1	0	0	0
4	1	0.1	1	2	0.2	1	0	0	0
4	1	0.1	1	2	0.3	1	0	0	0
4	1	0.1	1	2	0.4	1	0	0	0
4	1	0.1	1	2	0.5	1	0	0	0
4	1	0.1	1	3	0	1	0	0	0
4	1	0.1	1	3	0.1	1	0	0	0
4	1	0.1	1	3	0.2	1	0	0	0
4	1	0.1	1	3	0.3	1	0	0	0
4	1	0.1	1	3	0.4	1	0	0	0
4	1	0.1	1	3	0.5	1	0	0	0
4	1	0.1	2	1	0	1	0	0	0
4	1	0.1	2	1	0.1	1	0	0	0
4	1	0.1	2	1	0.2	1	0	0	0
4	1	0.1	2	1	0.3	1	0	0	0
4	1	0.1	2	1	0.4	1	0	0	0
4	1	0.1	2	1	0.5	1	0	0	0
4	1	0.1	2	2	0	1	0	0	0
4	1	0.1	2	2	0.1	1	0	0	0
4	1	0.1	2	2	0.2	1	0	0	0
4	1	0.1	2	2	0.3	1	0	0	0
4	1	0.1	2	2	0.4	1	0	0	0
4	1	0.1	2	2	0.5	1	0	0	0
4	1	0.1	2	3	0	1	0	0	0
4	1	0.1	2	3	0.1	1	0	0	0
4	1	0.1	2	3	0.2	1	0	0	0
4	1	0.1	2	3	0.3	1	0	0	0
4	1	0.1	2	3	0.4	1	0	0	0
4	1	0.1	2	3	0.5	1	0	0	0
4	1	0.1	3	1	0	1	0	0	0
4	1	0.1	3	1	0.1	1	0	0	0
4	1	0.1	3	1	0.2	1	0	0	0
4	1	0.1	3	1	0.3	1	0	0	0
4	1	0.1	3	1	0.4	1	0	0	0
4	1	0.1	3	1	0.5	1	0	0	0
4	1	0.1	3	2	0	1	0	0	0
4	1	0.1	3	2	0.1	1	0	0	0
4	1	0.1	3	2	0.2	1	0	0	0
4	1	0.1	3	2	0.3	1	0	0	0
4	1	0.1	3	2	0.4	1	0	0	0
4	1	0.1	3	2	0.5	1	0	0	0
4	1	0.1	3	3	0	1	0	0	0
4	1	0.1	3	3	0.1	1	0	0	0
4	1	0.1	3	3	0.2	1	0	0	0
4	1	0.1	3	3	0.3	1	0	0	0
4	1	0.1	3	3	0.4	1	0	0	0
4	1	0.1	3	3	0.5	1	0	0	0
4	1	0.2	1	1	0	1	0	0	0
4	1	0.2	1	1	0.1	1	0	0	0
4	1	0.2	1	1	0.2	1	0	0	0
4	1	0.2	1	1	0.3	1	0	0	0
4	1	0.2	1	1	0.4	1	0	0	0
4	1	0.2	1	1	0.5	1	0	0	0
4	1	0.2	1	2	0	1	0	0	0
4	1	0.2	1	2	0.1	1	0	0	0
4	1	0.2	1	2	0.2	1	0	0	0
4	1	0.2	1	2	0.3	1	0	0	0
4	1	0.2	1	2	0.4	1	0	0	0
4	1	0.2	1	2	0.5	1	0	0	0
4	1	0.2	1	3	0	1	0	0	0
4	1	0.2	1	3	0.1	1	0	0	0
4	1	0.2	1	3	0.2	1	0	0	0
4	1	0.2	1	3	0.3	1	0	0	0
4	1	0.2	1	3	0.4	1	0	0	0
4	1	0.2	1	3	0.5	1	0	0	0
4	1	0.2	2	1	0	1	0	0	0
4	1	0.2	2	1	0.1	1	0	0	0
4	1	0.2	2	1	0.2	1	0	0	0
4	1	0.2	2	1	0.3	1	0	0	0
4	1	0.2	2	1	0.4	1	0	0	0
4	1	0.2	2	1	0.5	1	0	0	0
4	1	0.2	2	2	0	1	0	0	0
4	1	0.2	2	2	0.1	1	0	0	0
4	1	0.2	2	2	0.2	1	0	0	0
4	1	0.2	2	2	0.3	1	0	0	0
4	1	0.2	2	2	0.4	1	0	0	0
4	1	0.2	2	2	0.5	1	0	0	0
4	1	0.2	2	3	0	1	0	0	0
4	1	0.2	2	3	0.1	1	0	0	0
4	1	0.2	2	3	0.2	1	0	0	0
4	1	0.2	2	3	0.3	1	0	0	0
4	1	0.2	2	3	0.4	1	0	0	0
4	1	0.2	2	3	0.5	1	0	0	0
4	1	0.2	3	1	0	1	0	0	0
4	1	0.2	3	1	0.1	1	0	0	0
4	1	0.2	3	1	0.2	1	0	0	0
4	1	0.2	3	1	0.3	1	0	0	0
4	1	0.2	3	1	0.4	1	0	0	0
4	1	0.2	3	1	0.5	1	0	0	0
4	1	0.2	3	2	0	1	0	0	0
4	1	0.2	3	2	0.1	1	0	0	0
4	1	0.2	3	2	0.2	1	0	0	0
4	1	0.2	3	2	0.3	1	0	0	0
4	1	0.2	3	2	0.4	1	0	0	0
4	1	0.2	3	2	0.5	1	0	0	0
4	1	0.2	3	3	0	1	0	0	0
4	1	0.2	3	3	0.1	1	0	0	0
4	1	0.2	3	3	0.2	1	0	0	0
4	1	0.2	3	3	0.3	1	0	0	0
4	1	0.2	3	3	0.4	1	0	0	0
4	1	0.2	3	3	0.5	1	0	0	0
4	2	-0.2	1	1	0	0	5.59483	1.89994	1
4	2	-0.2	1	1	0.1	0	5.59483	1.89994	1
4	2	-0.2	1	1	0.2	0	5.68297	1.69995	1
4	2	-0.2	1	1	0.3	0	5.68297	1.69995	1
4	2	-0.2	1	1	0.4	0	5.98645	1.49994	1
4	2	-0.2	1	1	0.5	0	5.98645	1.49994	1
4	2	-0.2	1	2	0	0	6.11377	2.69998	1
4	2	-0.2	1	2	0.1	0	5.98157	2.59996	1
4	2	-0.2	1	2	0.2	0	5.89288	2.49999	1
4	2	-0.2	1	2	0.3	0	5.83839	2.29999	1
4	2	-0.2	1	2	0.4	0	5.76666	2.10002	1
4	2	-0.2	1	2	0.5	0	5.59483	1.89994	1
4	2	-0.2	1	3	0	0	6.58843	3.10002	1
4	2	-0.2	1	3	0.1	0	6.42391	2.99999	1
4	2	-0.2	1	3	0.2	0	6.22745	2.80001	1
4	2	-0.2	1	3	0.3	0	6.11377	2.69998	1
4	2	-0.2	1	3	0.4	0	5.98157	2.59996	1
4	2	-0.2	1	3	0.5	0	5.83839	2.29999	1
4	2	-0.2	2	1	0	0	5.76666	2.10002	1
4	2	-0.2	2	1	0.1	0	5.76666	2.10002	1
4	2	-0.2	2	1	0.2	0	5.59483	1.89994	1
4	2	-0.2	2	1	0.3	0	5.68297	1.69995	1
4	2	-0.2	2	1	0.4	0	5.68297	1.69995	1
4	2	-0.2	2	1	0.5	0	5.98645	1.49994	1
4	2	-0.2	2	2	0	0	6.22745	2.80001	1
4	2	-0.2	2	2	0.1	0	5.98157	2.59996	1
4	2	-0.2	2	2	0.2	0	5.98157	2.59996	1
4	2	-0.2	2	2	0.3	0	5.85291	2.39998	1
4	2	-0.2	2	2	0.4	0	5.76666	2.10002	1
4	2	-0.2	2	2	0.5	0	5.59483	1.89994	1
4	2	-0.2	2	3	0	0	6.80273	3.19997	1
4	2	-0.2	2	3	0.1	0	6.42391	2.99999	1
4	2	-0.2	2	3	0.2	0	6.33009	2.89998	1
4	2	-0.2	2	3	0.3	0	6.22745	2.80001	1
4	2	-0.2	2	3	0.4	0	5.98157	2.59996	1
4	2	-0.2	2	3	0.5	0	5.89288	2.49999	1
4	2	-0.2	3	1	0	0	5.83839	2.29999	1
4	2	-0.2	3	1	0.1	0	5.78065	2.19998	1
4	2	-0.2	3	1	0.2	0	5.76666	2.10002	1
4	2	-0.2	3	1	0.3	0	5.59483	1.89994	1
4	2	-0.2	3	1	0.4	0	5.68297	1.69995	1
4	2	-0.2	3	1	0.5	0	5.68297	1.69995	1
4	2	-0.2	3	2	0	0	6.22745	2.80001	1
4	2	-0.2	3	2	0.1	0	6.11377	2.69998	1
4	2	-0.2	3	2	0.2	0	5.98157	2.59996	1
4	2	-0.2	3	2	0.3	0	5.89288	2.49999	1
4	2	-0.2	3	2	0.4	0	5.83839	2.29999	1
4	2	-0.2	3	2	0.5	0	5.76666	2.10002	1
4	2	-0.2	3	3	0	0	6.80273	3.19997	1
4	2	-0.2	3	3	0.1	0	6.58843	3.10002	1
4	2	-0.2	3	3	0.2	0	6.42391	2.99999	1
4	2	-0.2	3	3	0.3	0	6.22745	2.80001	1
4	2	-0.2	3	3	0.4	0	5.98157	2.59996	1
4	2	-0.2	3	3	0.5	0	5.89288	2.49999	1
4	2	-0.1	1	1	0	0	5.78065	2.19998	1
4	2	-0.1	1	1	0.1	0	5.76666	1.99997	1
4	2	-0.1	1	1	0.2	0	5.59483	1.89994	1
4	2	-0.1	1	1	0.3	0	5.59483	1.89994	1
4	2	-0.1	1	1	0.4	0	5.68297	1.69995	1
4	2	-0.1	1	1	0.5	0	5.68297	1.69995	1
4	2	-0.1	1	2	0	0	6.22745	2.80001	1
4	2	-0.1	1	2	0.1	0	6.11377	2.69998	1
4	2	-0.1	1	2	0.2	0	5.98157	2.59996	1
4	2	-0.1	1	2	0.3	0	5.89288	2.49999	1
4	2	-0.1	1	2	0.4	0	5.83839	2.29999	1
4	2	-0.1	1	2	0.5	0	5.76666	1.99997	1
4	2	-0.1	1	3	0	0	6.80273	3.19997	1
4	2	-0.1	1	3	0.1	0	6.58843	3.10002	1
4	2	-0.1	1	3	0.2	0	6.42391	2.99999	1
4	2	-0.1	1	3	0.3	0	6.33009	2.89998	1
4	2	-0.1	1	3	0.4	0	6.11377	2.69998	1
4	2	-0.1	1	3	0.5	0	5.98157	2.59996	1
4	2	-0.1	2	1	0	0	5.89288	2.49999	1
4	2	-0.1	2	1	0.1	0	5.83839	2.29999	1
4	2	-0.1	2	1	0.2	0	5.76666	2.10002	1
4	2	-0.1	2	1	0.3	0	5.59483	1.89994	1
4	2	-0.1	2	1	0.4	0	5.59483	1.89994	1
4	2	-0.1	2	1	0.5	0	5.68297	1.69995	1
4	2	-0.1	2	2	0	0	6.33009	2.89998	1
4	2	-0.1	2	2	0.1	0	6.22745	2.80001	1
4	2	-0.1	2	2	0.2	0	6.11377	2.69998	1
4	2	-0.1	2	2	0.3	0	5.98157	2.59996	1
4	2	-0.1	2	2	0.4	0	5.89288	2.49999	1
4	2	-0.1	2	2	0.5	0	5.78065	2.19998	1
4	2	-0.1	2	3	0	0	6.80273	3.19997	1
4	2	-0.1	2	3	0.1	0	6.80273	3.19997	1
4	2	-0.1	2	3	0.2	0	6.58843	3.10002	1
4	2	-0.1	2	3	0.3	0	6.33009	2.89998	1
4	2	-0.1	2	3	0.4	0	6.22745	2.80001	1
4	2	-0.1	2	3	0.5	0	5.98157	2.59996	1
4	2	-0.1	3	1	0	0	5.89288	2.49999	1
4	2	-0.1	3	1	0.1	0	5.89288	2.49999	1
4	2	-0.1	3	1	0.2	0	5.83839	2.29999	1
4	2	-0.1	3	1	0.3	0	5.76666	2.10002	1
4	2	-0.1	3	1	0.4	0	5.59483	1.89994	1
4	2	-0.1	3	1	0.5	0	5.56852	1.79997	1
4	2	-0.1	3	2	0	0	6.42391	2.99999	1
4	2	-0.1	3	2	0.1	0	6.33009	2.89998	1
4	2	-0.1	3	2	0.2	0	6.22745	2.80001	1
4	2	-0.1	3	2	0.3	0	5.98157	2.59996	1
4	2	-0.1	3	2	0.4	0	5.89288	2.49999	1
4	2	-0.1	3	2	0.5	0	5.83839	2.29999	1
4	2	-0.1	3	3	0	0	6.80273	3.19997	1
4	2	-0.1	3	3	0.1	0	6.80273	3.19997	1
4	2	-0.1	3	3	0.2	0	6.58843	3.10002	1
4	2	-0.1	3	3	0.3	0	6.42391	2.99999	1
4	2	-0.1	3	3	0.4	0	6.22745	2.80001	1
4	2	-0.1	3	3	0.5	0	5.98157	2.59996	1
4	2	0	1	1	0	0	5.89288	2.49999	1
4	2	0	1	1	0.1	0	5.83839	2.19994	1
4	2	0	1	1	0.2	0	5.78065	2.09993	1
4	2	0	1	1	0.3	0	5.76666	1.99997	1
4	2	0	1	1	0.4	0	5.59483	1.89994	1
4	2	0	1	1	0.5	0	5.56852	1.79997	1
4	2	0	1	2	0	0	6.42391	2.99999	1
4	2	0	1	2	0.1	0	6.33009	2.89998	1
4	2	0	1	2	0.2	0	6.22745	2.80001	1
4	2	0	1	2	0.3	0	5.98157	2.59996	1
4	2	0	1	2	0.4	0	5.98157	2.59996	1
4	2	0	1	2	0.5	0	5.83839	2.19994	1
4	2	0	1	3	0	0	6.80273	3.19997	1
4	2	0	1	3	0.1	0	6.80273	3.19997	1
4	2	0	1	3	0.2	0	6.58843	3.10002	1
4	2	0	1	3	0.3	0	6.42391	2.99999	1
4	2	0	1	3	0.4	0	6.22745	2.80001	1
4	2	0	1	3	0.5	0	6.11377	2.69998	1
4	2	0	2	1	0	0	5.98157	2.59996	1
4	2	0	2	1	0.1	0	5.89288	2.49999	1
4	2	0	2	1	0.2	0	5.83839	2.29999	1
4	2	0	2	1	0.3	0	5.78065	2.09993	1
4	2	0	2	1	0.4	0	5.76666	1.99997	1
4	2	0	2	1	0.5	0	5.59483	1.89994	1
4	2	0	2	2	0	0	6.42391	2.99999	1
4	2	0	2	2	0.1	0	6.33009	2.89998	1
4	2	0	2	2	0.2	0	6.22745	2.80001	1
4	2	0	2	2	0.3	0	6.11377	2.69998	1
4	2	0	2	2	0.4	0	5.98157	2.59996	1
4	2	0	2	2	0.5	0	5.89288	2.49999	1
4	2	0	2	3	0	0	6.80273	3.19997	1
4	2	0	2	3	0.1	0	6.80273	3.19997	1
4	2	0	2	3	0.2	0	6.80273	3.19997	1
4	2	0	2	3	0.3	0	6.42391	2.99999	1
4	2	0	2	3	0.4	0	6.33009	2.89998	1
4	2	0	2	3	0.5	0	6.11377	2.69998	1
4	2	0	3	1	0	0	5.98157	2.59996	1
4	2	0	3	1	0.1	0	5.98157	2.59996	1
4	2	0	3	1	0.2	0	5.89288	2.49999	1
4	2	0	3	1	0.3	0	5.83839	2.29999	1
4	2	0	3	1	0.4	0	5.78065	2.09993	1
4	2	0	3	1	0.5	0	5.76666	1.99997	1
4	2	0	3	2	0	0	6.80273	3.19997	1
4	2	0	3	2	0.1	0	6.42391	2.99999	1
4	2	0	3	2	0.2	0	6.33009	2.89998	1
4	2	0	3	2	0.3	0	6.22745	2.80001	1
4	2	0	3	2	0.4	0	5.98157	2.59996	1
4	2	0	3	2	0.5	0	5.89288	2.49999	1
4	2	0	3	3	0	0	6.80273	3.19997	1
4	2	0	3	3	0.1	0	6.80273	3.19997	1
4	2	0	3	3	0.2	0	6.80273	3.19997	1
4	2	0	3	3	0.3	0	6.58843	3.10002	1
4	2	0	3	3	0.4	0	6.33009	2.89998	1
4	2	0	3	3	0.5	0	6.22745	2.80001	1
4	2	0.1	1	1	0	0	5.98157	2.59996	1
4	2	0.1	1	1	0.1	0	5.89288	2.49999	1
4	2	0.1	1	1	0.2	0	5.89288	2.39994	1
4	2	0.1	1	1	0.3	0	5.83839	2.19994	1
4	2	0.1	1	1	0.4	0	5.76666	1.99997	1
4	2	0.1	1	1	0.5	0	5.76666	1.99997	1
4	2	0.1	1	2	0	0	6.58843	3.10002	1
4	2	0.1	1	2	0.1	0	6.42391	2.99999	1
4	2	0.1	1	2	0.2	0	6.33009	2.89998	1
4	2	0.1	1	2	0.3	0	6.22745	2.80001	1
4	2	0.1	1	2	0.4	0	6.11377	2.69998	1
4	2	0.1	1	2	0.5	0	5.98157	2.59996	1
4	2	0.1	1	3	0	0	6.80273	3.19997	1
4	2	0.1	1	3	0.1	0	6.80273	3.19997	1
4	2	0.1	1	3	0.2	0	6.80273	3.19997	1
4	2	0.1	1	3	0.3	0	6.58843	3.10002	1
4	2	0.1	1	3	0.4	0	6.42391	2.99999	1
4	2	0.1	1	3	0.5	0	6.22745	2.80001	1
4	2	0.1	2	1	0	0	6.11377	2.69998	1
4	2	0.1	2	1	0.1	0	5.98157	2.59996	1
4	2	0.1	2	1	0.2	0	5.89288	2.49999	1
4	2	0.1	2	1	0.3	0	5.89288	2.39994	1
4	2	0.1	2	1	0.4	0	5.83839	2.19994	1
4	2	0.1	2	1	0.5	0	5.76666	1.99997	1
4	2	0.1	2	2	0	0	6.80273	3.19997	1
4	2	0.1	2	2	0.1	0	6.58843	3.10002	1
4	2	0.1	2	2	0.2	0	6.33009	2.89998	1
4	2	0.1	2	2	0.3	0	6.22745	2.80001	1
4	2	0.1	2	2	0.4	0	6.11377	2.69998	1
4	2	0.1	2	2	0.5	0	5.98157	2.59996	1
4	2	0.1	2	3	0	0	6.80273	3.19997	1
4	2	0.1	2	3	0.1	0	6.80273	3.19997	1
4	2	0.1	2	3	0.2	0	6.80273	3.19997	1
4	2	0.1	2	3	0.3	0	6.80273	3.19997	1
4	2	0.1	2	3	0.4	0	6.42391	2.99999	1
4	2	0.1	2	3	0.5	0	6.22745	2.80001	1
4	2	0.1	3	1	0	0	6.22745	2.80001	1
4	2	0.1	3	1	0.1	0	6.11377	2.69998	1
4	2	0.1	3	1	0.2	0	5.98157	2.59996	1
4	2	0.1	3	1	0.3	0	5.89288	2.49999	1
4	2	0.1	3	1	0.4	0	5.85291	2.29993	1
4	2	0.1	3	1	0.5	0	5.78065	2.09993	1
4	2	0.1	3	2	0	0	6.80273	3.19997	1
4	2	0.1	3	2	0.1	0	6.80273	3.19997	1
4	2	0.1	3	2	0.2	0	6.42391	2.99999	1
4	2	0.1	3	2	0.3	0	6.33009	2.89998	1
4	2	0.1	3	2	0.4	0	6.22745	2.80001	1
4	2	0.1	3	2	0.5	0	5.98157	2.59996	1
4	2	0.1	3	3	0	0	6.80273	3.19997	1
4	2	0.1	3	3	0.1	0	6.80273	3.19997	1
4	2	0.1	3	3	0.2	0	6.80273	3.19997	1
4	2	0.1	3	3	0.3	0	6.80273	3.19997	1
4	2	0.1	3	3	0.4	0	6.58843	3.10002	1
4	2	0.1	3	3	0.5	0	6.33009	2.89998	1
4	2	0.2	1	1	0	0	6.11377	2.69998	1
4	2	0.2	1	1	0.1	0	5.98157	2.59996	1
4	2	0.2	1	1	0.2	0	5.98157	2.49991	1
4	2	0.2	1	1	0.3	0	5.89288	2.39994	1
4	2	0.2	1	1	0.4	0	5.85291	2.29993	1
4	2	0.2	1	1	0.5	0	5.76666	1.99997	1
4	2	0.2	1	2	0	0	6.80273	3.19997	1
4	2	0.2	1	2	0.1	0	6.58843	3.10002	1
4	2	0.2	1	2	0.2	0	6.42391	2.99999	1
4	2	0.2	1	2	0.3	0	6.33009	2.89998	1
4	2	0.2	1	2	0.4	0	6.22745	2.80001	1
4	2	0.2	1	2	0.5	0	6.11377	2.69998	1
4	2	0.2	1	3	0	0	6.80273	3.19997	1
4	2	0.2	1	3	0.1	0	6.80273	3.19997	1
4	2	0.2	1	3	0.2	0	6.80273	3.19997	1
4	2	0.2	1	3	0.3	0	6.80273	3.19997	1
4	2	0.2	1	3	0.4	0	6.58843	3.10002	1
4	2	0.2	1	3	0.5	0	6.33009	2.89998	1
4	2	0.2	2	1	0	0	6.22745	2.80001	1
4	2	0.2	2	1	0.1	0	6.11377	2.69998	1
4	2	0.2	2	1	0.2	0	5.98157	2.59996	1
4	2	0.2	2	1	0.3	0	5.98157	2.49991	1
4	2	0.2	2	1	0.4	0	5.89288	2.39994	1
4	2	0.2	2	1	0.5	0	5.83839	2.19994	1
4	2	0.2	2	2	0	0	6.80273	3.19997	1
4	2	0.2	2	2	0.1	0	6.80273	3.19997	1
4	2	0.2	2	2	0.2	0	6.58843	3.10002	1
4	2	0.2	2	2	0.3	0	6.33009	2.89998	1
4	2	0.2	2	2	0.4	0	6.22745	2.80001	1
4	2	0.2	2	2	0.5	0	6.11377	2.69998	1
4	2	0.2	2	3	0	0	6.80273	3.19997	1
4	2	0.2	2	3	0.1	0	6.80273	3.19997	1
4	2	0.2	2	3	0.2	0	6.80273	3.19997	1
4	2	0.2	2	3	0.3	0	6.80273	3.19997	1
4	2	0.2	2	3	0.4	0	6.58843	3.10002	1
4	2	0.2	2	3	0.5	0	6.42391	2.99999	1
4	2	0.2	3	1	0	0	6.22745	2.80001	1
4	2	0.2	3	1	0.1	0	6.22745	2.80001	1
4	2	0.2	3	1	0.2	0	6.11377	2.69998	1
4	2	0.2	3	1	0.3	0	5.98157	2.59996	1
4	2	0.2	3	1	0.4	0	5.98157	2.49991	1
4	2	0.2	3	1	0.5	0	5.85291	2.29993	1
4	2	0.2	3	2	0	0	6.80273	3.19997	1
4	2	0.2	3	2	0.1	0	6.80273	3.19997	1
4	2	0.2	3	2	0.2	0	6.80273	3.19997	1
4	2	0.2	3	2	0.3	0	6.42391	2.99999	1
4	2	0.2	3	2	0.4	0	6.33009	2.89998	1
4	2	0.2	3	2	0.5	0	6.22745	2.80001	1
4	2	0.2	3	3	0	0	6.80273	3.19997	1
4	2	0.2	3	3	0.1	0	6.80273	3.19997	1
4	2	0.2	3	3	0.2	0	6.80273	3.19997	1
4	2	0.2	3	3	0.3	0	6.80273	3.19997	1
4	2	0.2	3	3	0.4	0	6.80273	3.19997	1
4	2	0.2	3	3	0.5	0	6.42391	2.99999	1
4	2	-0.2	1	1	0	1	0	0	0
4	2	-0.2	1	1	0.1	1	0	0	0
4	2	-0.2	1	1	0.2	1	0	0	0
4	2	-0.2	1	1	0.3	1	0	0	0
4	2	-0.2	1	1	0.4	1	0	0	0
4	2	-0.2	1	1	0.5	1	0	0	0
4	2	-0.2	1	2	0	1	0	0	0
4	2	-0.2	1	2	0.1	1	0	0	0
4	2	-0.2	1	2	0.2	1	0	0	0
4	2	-0.2	1	2	0.3	1	0	0	0
4	2	-0.2	1	2	0.4	1	0	0	0
4	2	-0.2	1	2	0.5	1	0	0	0
4	2	-0.2	1	3	0	1	5.74665	1.59999	1
4	2	-0.2	1	3	0.1	1	0	0	0
4	2	-0.2	1	3	0.2	1	0	0	0
4	2	-0.2	1	3	0.3	1	0	0	0
4	2	-0.2	1	3	0.4	1	0	0	0
4	2	-0.2	1	3	0.5	1	0	0	0
4	2	-0.2	2	1	0	1	0	0	0
4	2	-0.2	2	1	0.1	1	0	0	0
4	2	-0.2	2	1	0.2	1	0	0	0
4	2	-0.2	2	1	0.3	1	0	0	0
4	2	-0.2	2	1	0.4	1	0	0	0
4	2	-0.2	2	1	0.5	1	0	0	0
4	2	-0.2	2	2	0	1	0	0	0
4	2	-0.2	2	2	0.1	1	0	0	0
4	2	-0.2	2	2	0.2	1	0	0	0
4	2	-0.2	2	2	0.3	1	0	0	0
4	2	-0.2	2	2	0.4	1	0	0	0
4	2	-0.2	2	2	0.5	1	0	0	0
4	2	-0.2	2	3	0	1	5.80772	1.70002	1
4	2	-0.2	2	3	0.1	1	5.74665	1.59999	1
4	2	-0.2	2	3	0.2	1	0	0	0
4	2	-0.2	2	3	0.3	1	0	0	0
4	2	-0.2	2	3	0.4	1	0	0	0
4	2	-0.2	2	3	0.5	1	0	0	0
4	2	-0.2	3	1	0	1	0	0	0
4	2	-0.2	3	1	0.1	1	0	0	0
4	2	-0.2	3	1	0.2	1	0	0	0
4	2	-0.2	3	1	0.3	1	0	0	0
4	2	-0.2	3	1	0.4	1	0	0	0
4	2	-0.2	3	1	0.5	1	0	0	0
4	2	-0.2	3	2	0	1	5.82958	1.50003	1
4	2	-0.2	3	2	0.1	1	0	0	0
4	2	-0.2	3	2	0.2	1	0	0	0
4	2	-0.2	3	2	0.3	1	0	0	0
4	2	-0.2	3	2	0.4	1	0	0	0
4	2	-0.2	3	2	0.5	1	0	0	0
4	2	-0.2	3	3	0	1	5.58125	1.90002	1
4	2	-0.2	3	3	0.1	1	5.80772	1.70002	1
4	2	-0.2	3	3	0.2	1	5.74665	1.59999	1
4	2	-0.2	3	3	0.3	1	0	0	0
4	2	-0.2	3	3	0.4	1	0	0	0
4	2	-0.2	3	3	0.5	1	0	0	0
4	2	-0.1	1	1	0	1	0	0	0
4	2	-0.1	1	1	0.1	1	0	0	0
4	2	-0.1	1	1	0.2	1	0	0	0
4	2	-0.1	1	1	0.3	1	0	0	0
4	2	-0.1	1	1	0.4	1	0	0	0
4	2	-0.1	1	1	0.5	1	0	0	0
4	2	-0.1	1	2	0	1	0	0	0
4	2	-0.1	1	2	0.1	1	0	0	0
4	2	-0.1	1	2	0.2	1	0	0	0
4	2	-0.1	1	2	0.3	1	0	0	0
4	2	-0.1	1	2	0.4	1	0	0	0
4	2	-0.1	1	2	0.5	1	0	0	0
4	2	-0.1	1	3	0	1	5.61722	1.8	1
4	2	-0.1	1	3	0.1	1	5.80772	1.70002	1
4	2	-0.1	1	3	0.2	1	5.74665	1.59999	1
4	2	-0.1	1	3	0.3	1	0	0	0
4	2	-0.1	1	3	0.4	1	0	0	0
4	2	-0.1	1	3	0.5	1	0	0	0
4	2	-0.1	2	1	0	1	0	0	0
4	2	-0.1	2	1	0.1	1	0	0	0
4	2	-0.1	2	1	0.2	1	0	0	0
4	2	-0.1	2	1	0.3	1	0	0	0
4	2	-0.1	2	1	0.4	1	0	0	0
4	2	-0.1	2	1	0.5	1	0	0	0
4	2	-0.1	2	2	0	1	5.74665	1.59999	1
4	2	-0.1	2	2	0.1	1	5.7398	1.20002	1
4	2	-0.1	2	2	0.2	1	0	0	0
4	2	-0.1	2	2	0.3	1	0	0	0
4	2	-0.1	2	2	0.4	1	0	0	0
4	2	-0.1	2	2	0.5	1	0	0	0
4	2	-0.1	2	3	0	1	5.96171	2.10002	1
4	2	-0.1	2	3	0.1	1	5.61722	1.8	1
4	2	-0.1	2	3	0.2	1	5.80772	1.70002	1
4	2	-0.1	2	3	0.3	1	5.82958	1.50003	1
4	2	-0.1	2	3	0.4	1	0	0	0
4	2	-0.1	2	3	0.5	1	0	0	0
4	2	-0.1	3	1	0	1	0	0	0
4	2	-0.1	3	1	0.1	1	0	0	0
4	2	-0.1	3	1	0.2	1	0	0	0
4	2	-0.1	3	1	0.3	1	0	0	0
4	2	-0.1	3	1	0.4	1	0	0	0
4	2	-0.1	3	1	0.5	1	0	0	0
4	2	-0.1	3	2	0	1	5.61722	1.8	1
4	2	-0.1	3	2	0.1	1	5.74665	1.59999	1
4	2	-0.1	3	2	0.2	1	5.82958	1.50003	1
4	2	-0.1	3	2	0.3	1	0	0	0
4	2	-0.1	3	2	0.4	1	0	0	0
4	2	-0.1	3	2	0.5	1	0	0	0
4	2	-0.1	3	3	0	1	6.09822	2.19998	1
4	2	-0.1	3	3	0.1	1	5.7487	1.99999	1
4	2	-0.1	3	3	0.2	1	5.61722	1.8	1
4	2	-0.1	3	3	0.3	1	5.74665	1.59999	1
4	2	-0.1	3	3	0.4	1	5.7398	1.20002	1
4	2	-0.1	3	3	0.5	1	0	0	0
4	2	0	1	1	0	1	0	0	0
4	2	0	1	1	0.1	1	0	0	0
4	2	0	1	1	0.2	1	0	0	0
4	2	0	1	1	0.3	1	0	0	0
4	2	0	1	1	0.4	1	0	0	0
4	2	0	1	1	0.5	1	0	0	0
4	2	0	1	2	0	1	5.80772	1.70002	1
4	2	0	1	2	0.1	1	5.74665	1.49994	1
4	2	0	1	2	0.2	1	0	0	0
4	2	0	1	2	0.3	1	0	0	0
4	2	0	1	2	0.4	1	0	0	0
4	2	0	1	2	0.5	1	0	0	0
4	2	0	1	3	0	1	6.09822	2.19998	1
4	2	0	1	3	0.1	1	5.7487	1.99999	1
4	2	0	1	3	0.2	1	5.61722	1.8	1
4	2	0	1	3	0.3	1	5.80772	1.70002	1
4	2	0	1	3	0.4	1	5.82958	1.39998	1
4	2	0	1	3	0.5	1	0	0	0
4	2	0	2	1	0	1	0	0	0
4	2	0	2	1	0.1	1	0	0	0
4	2	0	2	1	0.2	1	0	0	0
4	2	0	2	1	0.3	1	0	0	0
4	2	0	2	1	0.4	1	0	0	0
4	2	0	2	1	0.5	1	0	0	0
4	2	0	2	2	0	1	5.61722	1.8	1
4	2	0	2	2	0.1	1	5.80772	1.70002	1
4	2	0	2	2	0.2	1	5.74665	1.59999	1
4	2	0	2	2	0.3	1	0	0	0
4	2	0	2	2	0.4	1	0	0	0
4	2	0	2	2	0.5	1	0	0	0
4	2	0	2	3	0	1	6.2795	2.29999	1
4	2	0	2	3	0.1	1	5.96171	2.10002	1
4	2	0	2	3	0.2	1	5.7487	1.99999	1
4	2	0	2	3	0.3	1	5.61722	1.8	1
4	2	0	2	3	0.4	1	5.74665	1.59999	1
4	2	0	2	3	0.5	1	0	0	0
4	2	0	3	1	0	1	5.82958	1.50003	1
4	2	0	3	1	0.1	1	0	0	0
4	2	0	3	1	0.2	1	0	0	0
4	2	0	3	1	0.3	1	0	0	0
4	2	0	3	1	0.4	1	0	0	0
4	2	0	3	1	0.5	1	0	0	0
4	2	0	3	2	0	1	5.7487	1.99999	1
4	2	0	3	2	0.1	1	5.61722	1.8	1
4	2	0	3	2	0.2	1	5.80772	1.70002	1
4	2	0	3	2	0.3	1	5.74665	1.59999	1
4	2	0	3	2	0.4	1	0	0	0
4	2	0	3	2	0.5	1	0	0	0
4	2	0	3	3	0	1	6.54082	2.49999	1
4	2	0	3	3	0.1	1	6.2795	2.29999	1
4	2	0	3	3	0.2	1	5.96171	2.10002	1
4	2	0	3	3	0.3	1	5.58125	1.90002	1
4	2	0	3	3	0.4	1	5.80772	1.70002	1
4	2	0	3	3	0.5	1	5.82958	1.39998	1
4	2	0.1	1	1	0	1	0	0	0
4	2	0.1	1	1	0.1	1	0	0	0
4	2	0.1	1	1	0.2	1	0	0	0
4	2	0.1	1	1	0.3	1	0	0	0
4	2	0.1	1	1	0.4	1	0	0	0
4	2	0.1	1	1	0.5	1	0	0	0
4	2	0.1	1	2	0	1	5.7487	1.99999	1
4	2	0.1	1	2	0.1	1	5.61722	1.8	1
4	2	0.1	1	2	0.2	1	5.80772	1.70002	1
4	2	0.1	1	2	0.3	1	5.74665	1.49994	1
4	2	0.1	1	2	0.4	1	0	0	0
4	2	0.1	1	2	0.5	1	0	0	0
4	2	0.1	1	3	0	1	6.54082	2.49999	1
4	2	0.1	1	3	0.1	1	6.2795	2.29999	1
4	2	0.1	1	3	0.2	1	5.96171	2.10002	1
4	2	0.1	1	3	0.3	1	5.7487	1.99999	1
4	2	0.1	1	3	0.4	1	5.61722	1.8	1
4	2	0.1	1	3	0.5	1	5.74665	1.49994	1
4	2	0.1	2	1	0	1	5.74665	1.49994	1
4	2	0.1	2	1	0.1	1	0	0	0
4	2	0.1	2	1	0.2	1	0	0	0
4	2	0.1	2	1	0.3	1	0	0	0
4	2	0.1	2	1	0.4	1	0	0	0
4	2	0.1	2	1	0.5	1	0	0	0
4	2	0.1	2	2	0	1	5.96171	2.10002	1
4	2	0.1	2	2	0.1	1	5.7487	1.99999	1
4	2	0.1	2	2	0.2	1	5.61722	1.8	1
4	2	0.1	2	2	0.3	1	5.80772	1.70002	1
4	2	0.1	2	2	0.4	1	5.82958	1.39998	1
4	2	0.1	2	2	0.5	1	0	0	0
4	2	0.1	2	3	0	1	6.69072	2.59996	1
4	2	0.1	2	3	0.1	1	6.54082	2.49999	1
4	2	0.1	2	3	0.2	1	6.2795	2.29999	1
4	2	0.1	2	3	0.3	1	5.96171	2.10002	1
4	2	0.1	2	3	0.4	1	5.61722	1.8	1
4	2	0.1	2	3	0.5	1	5.74665	1.49994	1
4	2	0.1	3	1	0	1	5.80772	1.70002	1
4	2	0.1	3	1	0.1	1	5.74665	1.59999	1
4	2	0.1	3	1	0.2	1	5.82958	1.39998	1
4	2	0.1	3	1	0.3	1	0	0	0
4	2	0.1	3	1	0.4	1	0	0	0
4	2	0.1	3	1	0.5	1	0	0	0
4	2	0.1	3	2	0	1	6.2795	2.29999	1
4	2	0.1	3	2	0.1	1	5.96171	2.10002	1
4	2	0.1	3	2	0.2	1	5.7487	1.99999	1
4	2	0.1	3	2	0.3	1	5.61722	1.8	1
4	2	0.1	3	2	0.4	1	5.74665	1.59999	1
4	2	0.1	3	2	0.5	1	0	0	0
4	2	0.1	3	3	0	1	6.92784	2.69998	1
4	2	0.1	3	3	0.1	1	6.69072	2.59996	1
4	2	0.1	3	3	0.2	1	6.39458	2.39998	1
4	2	0.1	3	3	0.3	1	5.96171	2.10002	1
4	2	0.1	3	3	0.4	1	5.7487	1.99999	1
4	2	0.1	3	3	0.5	1	5.61722	1.8	1
4	2	0.2	1	1	0	1	5.74665	1.49994	1
4	2	0.2	1	1	0.1	1	5.82958	1.39998	1
4	2	0.2	1	1	0.2	1	0	0	0
4	2	0.2	1	1	0.3	1	0	0	0
4	2	0.2	1	1	0.4	1	0	0	0
4	2	0.2	1	1	0.5	1	0	0	0
4	2	0.2	1	2	0	1	6.09822	2.19998	1
4	2	0.2	1	2	0.1	1	5.96171	2.10002	1
4	2	0.2	1	2	0.2	1	5.7487	1.99999	1
4	2	0.2	1	2	0.3	1	5.61722	1.69995	1
4	2	0.2	1	2	0.4	1	5.74665	1.49994	1
4	2	0.2	1	2	0.5	1	0	0	0
4	2	0.2	1	3	0	1	7.15865	2.80001	1
4	2	0.2	1	3	0.1	1	6.69072	2.59996	1
4	2	0.2	1	3	0.2	1	6.54082	2.49999	1
4	2	0.2	1	3	0.3	1	6.09822	2.19998	1
4	2	0.2	1	3	0.4	1	5.7487	1.99999	1
4	2	0.2	1	3	0.5	1	5.61722	1.8	1
4	2	0.2	2	1	0	1	5.61722	1.8	1
4	2	0.2	2	1	0.1	1	5.74665	1.49994	1
4	2	0.2	2	1	0.2	1	5.74665	1.49994	1
4	2	0.2	2	1	0.3	1	0	0	0
4	2	0.2	2	1	0.4	1	0	0	0
4	2	0.2	2	1	0.5	1	0	0	0
4	2	0.2	2	2	0	1	6.2795	2.29999	1
4	2	0.2	2	2	0.1	1	6.09822	2.19998	1
4	2	0.2	2	2	0.2	1	5.96171	2.10002	1
4	2	0.2	2	2	0.3	1	5.58125	1.90002	1
4	2	0.2	2	2	0.4	1	5.61722	1.69995	1
4	2	0.2	2	2	0.5	1	5.74665	1.49994	1
4	2	0.2	2	3	0	1	7.15865	2.80001	1
4	2	0.2	2	3	0.1	1	6.92784	2.69998	1
4	2	0.2	2	3	0.2	1	6.69072	2.59996	1
4	2	0.2	2	3	0.3	1	6.2795	2.29999	1
4	2	0.2	2	3	0.4	1	5.96171	2.10002	1
4	2	0.2	2	3	0.5	1	5.58125	1.90002	1
4	2	0.2	3	1	0	1	5.58125	1.90002	1
4	2	0.2	3	1	0.1	1	5.61722	1.8	1
4	2	0.2	3	1	0.2	1	5.80772	1.59997	1
4	2	0.2	3	1	0.3	1	5.74665	1.49994	1
4	2	0.2	3	1	0.4	1	0	0	0
4	2	0.2	3	1	0.5	1	0	0	0
4	2	0.2	3	2	0	1	6.54082	2.49999	1
4	2	0.2	3	2	0.1	1	6.2795	2.29999	1
4	2	0.2	3	2	0.2	1	5.96171	2.10002	1
4	2	0.2	3	2	0.3	1	5.7487	1.99999	1
4	2	0.2	3	2	0.4	1	5.61722	1.8	1
4	2	0.2	3	2	0.5	1	5.80772	1.59997	1
4	2	0.2	3	3	0	1	7.35856	2.89998	1
4	2	0.2	3	3	0.1	1	7.15865	2.80001	1
4	2	0.2	3	3	0.2	1	6.69072	2.59996	1
4	2	0.2	3	3	0.3	1	6.54082	2.49999	1
4	2	0.2	3	3	0.4	1	6.09822	2.19998	1
4	2	0.2	3	3	0.5	1	5.7487	1.99999	1
4	3	-0.2	1	1	0	0	0	0	0
4	3	-0.2	1	1	0.1	0	0	0	0
4	3	-0.2	1	1	0.2	0	0	0	0
4	3	-0.2	1	1	0.3	0	0	0	0
4	3	-0.2	1	1	0.4	0	0	0	0
4	3	-0.2	1	1	0.5	0	0	0	0
4	3	-0.2	1	2	0	0	6.03833	0.99998	1
4	3	-0.2	1	2	0.1	0	5.53422	0.90001	1
4	3	-0.2	1	2	0.2	0	5.53422	0.90001	1
4	3	-0.2	1	2	0.3	0	5.53422	0.90001	1
4	3	-0.2	1	2	0.4	0	0	0	0
4	3	-0.2	1	2	0.5	0	0	0	0
4	3	-0.2	1	3	0	0	6.03833	0.99998	1
4	3	-0.2	1	3	0.1	0	6.03833	0.99998	1
4	3	-0.2	1	3	0.2	0	6.03833	0.99998	1
4	3	-0.2	1	3	0.3	0	6.03833	0.99998	1
4	3	-0.2	1	3	0.4	0	5.53422	0.90001	1
4	3	-0.2	1	3	0.5	0	5.53422	0.90001	1
4	3	-0.2	2	1	0	0	5.53422	0.90001	1
4	3	-0.2	2	1	0.1	0	0	0	0
4	3	-0.2	2	1	0.2	0	0	0	0
4	3	-0.2	2	1	0.3	0	0	0	0
4	3	-0.2	2	1	0.4	0	0	0	0
4	3	-0.2	2	1	0.5	0	0	0	0
4	3	-0.2	2	2	0	0	6.03833	0.99998	1
4	3	-0.2	2	2	0.1	0	6.03833	0.99998	1
4	3	-0.2	2	2	0.2	0	5.53422	0.90001	1
4	3	-0.2	2	2	0.3	0	5.53422	0.90001	1
4	3	-0.2	2	2	0.4	0	5.53422	0.90001	1
4	3	-0.2	2	2	0.5	0	0	0	0
4	3	-0.2	2	3	0	0	6.03833	0.99998	1
4	3	-0.2	2	3	0.1	0	6.03833	0.99998	1
4	3	-0.2	2	3	0.2	0	6.03833	0.99998	1
4	3	-0.2	2	3	0.3	0	6.03833	0.99998	1
4	3	-0.2	2	3	0.4	0	6.03833	0.99998	1
4	3	-0.2	2	3	0.5	0	5.53422	0.90001	1
4	3	-0.2	3	1	0	0	5.53422	0.90001	1
4	3	-0.2	3	1	0.1	0	5.53422	0.90001	1
4	3	-0.2	3	1	0.2	0	0	0	0
4	3	-0.2	3	1	0.3	0	0	0	0
4	3	-0.2	3	1	0.4	0	0	0	0
4	3	-0.2	3	1	0.5	0	0	0	0
4	3	-0.2	3	2	0	0	6.03833	0.99998	1
4	3	-0.2	3	2	0.1	0	6.03833	0.99998	1
4	3	-0.2	3	2	0.2	0	6.03833	0.99998	1
4	3	-0.2	3	2	0.3	0	5.53422	0.90001	1
4	3	-0.2	3	2	0.4	0	5.53422	0.90001	1
4	3	-0.2	3	2	0.5	0	0	0	0
4	3	-0.2	3	3	0	0	6.03833	0.99998	1
4	3	-0.2	3	3	0.1	0	6.03833	0.99998	1
4	3	-0.2	3	3	0.2	0	6.03833	0.99998	1
4	3	-0.2	3	3	0.3	0	6.03833	0.99998	1
4	3	-0.2	3	3	0.4	0	6.03833	0.99998	1
4	3	-0.2	3	3	0.5	0	5.53422	0.90001	1
4	3	-0.1	1	1	0	0	5.53422	0.90001	1
4	3	-0.1	1	1	0.1	0	0	0	0
4	3	-0.1	1	1	0.2	0	0	0	0
4	3	-0.1	1	1	0.3	0	0	0	0
4	3	-0.1	1	1	0.4	0	0	0	0
4	3	-0.1	1	1	0.5	0	0	0	0
4	3	-0.1	1	2	0	0	6.03833	0.99998	1
4	3	-0.1	1	2	0.1	0	6.03833	0.99998	1
4	3	-0.1	1	2	0.2	0	6.03833	0.99998	1
4	3	-0.1	1	2	0.3	0	5.53422	0.90001	1
4	3	-0.1	1	2	0.4	0	5.53422	0.90001	1
4	3	-0.1	1	2	0.5	0	0	0	0
4	3	-0.1	1	3	0	0	6.03833	0.99998	1
4	3	-0.1	1	3	0.1	0	6.03833	0.99998	1
4	3	-0.1	1	3	0.2	0	6.03833	0.99998	1
4	3	-0.1	1	3	0.3	0	6.03833	0.99998	1
4	3	-0.1	1	3	0.4	0	6.03833	0.99998	1
4	3	-0.1	1	3	0.5	0	5.53422	0.90001	1
4	3	-0.1	2	1	0	0	5.53422	0.90001	1
4	3	-0.1	2	1	0.1	0	5.53422	0.90001	1
4	3	-0.1	2	1	0.2	0	0	0	0
4	3	-0.1	2	1	0.3	0	0	0	0
4	3	-0.1	2	1	0.4	0	0	0	0
4	3	-0.1	2	1	0.5	0	0	0	0
4	3	-0.1	2	2	0	0	6.03833	0.99998	1
4	3	-0.1	2	2	0.1	0	6.03833	0.99998	1
4	3	-0.1	2	2	0.2	0	6.03833	0.99998	1
4	3	-0.1	2	2	0.3	0	5.53422	0.90001	1
4	3	-0.1	2	2	0.4	0	5.53422	0.90001	1
4	3	-0.1	2	2	0.5	0	5.53422	0.90001	1
4	3	-0.1	2	3	0	0	6.03833	0.99998	1
4	3	-0.1	2	3	0.1	0	6.03833	0.99998	1
4	3	-0.1	2	3	0.2	0	6.03833	0.99998	1
4	3	-0.1	2	3	0.3	0	6.03833	0.99998	1
4	3	-0.1	2	3	0.4	0	6.03833	0.99998	1
4	3	-0.1	2	3	0.5	0	6.03833	0.99998	1
4	3	-0.1	3	1	0	0	5.53422	0.90001	1
4	3	-0.1	3	1	0.1	0	5.53422	0.90001	1
4	3	-0.1	3	1	0.2	0	5.53422	0.90001	1
4	3	-0.1	3	1	0.3	0	0	0	0
4	3	-0.1	3	1	0.4	0	0	0	0
4	3	-0.1	3	1	0.5	0	0	0	0
4	3	-0.1	3	2	0	0	6.03833	0.99998	1
4	3	-0.1	3	2	0.1	0	6.03833	0.99998	1
4	3	-0.1	3	2	0.2	0	6.03833	0.99998	1
4	3	-0.1	3	2	0.3	0	6.03833	0.99998	1
4	3	-0.1	3	2	0.4	0	5.53422	0.90001	1
4	3	-0.1	3	2	0.5	0	5.53422	0.90001	1
4	3	-0.1	3	3	0	0	6.03833	0.99998	1
4	3	-0.1	3	3	0.1	0	6.03833	0.99998	1
4	3	-0.1	3	3	0.2	0	6.03833	0.99998	1
4	3	-0.1	3	3	0.3	0	6.03833	0.99998	1
4	3	-0.1	3	3	0.4	0	6.03833	0.99998	1
4	3	-0.1	3	3	0.5	0	6.03833	0.99998	1
4	3	0	1	1	0	0	5.53422	0.90001	1
4	3	0	1	1	0.1	0	5.53422	0.90001	1
4	3	0	1	1	0.2	0	0	0	0
4	3	0	1	1	0.3	0	0	0	0
4	3	0	1	1	0.4	0	0	0	0
4	3	0	1	1	0.5	0	0	0	0
4	3	0	1	2	0	0	6.03833	0.99998	1
4	3	0	1	2	0.1	0	6.03833	0.99998	1
4	3	0	1	2	0.2	0	6.03833	0.99998	1
4	3	0	1	2	0.3	0	6.03833	0.99998	1
4	3	0	1	2	0.4	0	5.53422	0.90001	1
4	3	0	1	2	0.5	0	5.53422	0.90001	1
4	3	0	1	3	0	0	6.03833	0.99998	1
4	3	0	1	3	0.1	0	6.03833	0.99998	1
4	3	0	1	3	0.2	0	6.03833	0.99998	1
4	3	0	1	3	0.3	0	6.03833	0.99998	1
4	3	0	1	3	0.4	0	6.03833	0.99998	1
4	3	0	1	3	0.5	0	6.03833	0.99998	1
4	3	0	2	1	0	0	5.53422	0.90001	1
4	3	0	2	1	0.1	0	5.53422	0.90001	1
4	3	0	2	1	0.2	0	5.53422	0.90001	1
4	3	0	2	1	0.3	0	0	0	0
4	3	0	2	1	0.4	0	0	0	0
4	3	0	2	1	0.5	0	0	0	0
4	3	0	2	2	0	0	6.03833	0.99998	1
4	3	0	2	2	0.1	0	6.03833	0.99998	1
4	3	0	2	2	0.2	0	6.03833	0.99998	1
4	3	0	2	2	0.3	0	6.03833	0.99998	1
4	3	0	2	2	0.4	0	6.03833	0.99998	1
4	3	0	2	2	0.5	0	5.53422	0.90001	1
4	3	0	2	3	0	0	6.03833	0.99998	1
4	3	0	2	3	0.1	0	6.03833	0.99998	1
4	3	0	2	3	0.2	0	6.03833	0.99998	1
4	3	0	2	3	0.3	0	6.03833	0.99998	1
4	3	0	2	3	0.4	0	6.03833	0.99998	1
4	3	0	2	3	0.5	0	6.03833	0.99998	1
4	3	0	3	1	0	0	6.03833	0.99998	1
4	3	0	3	1	0.1	0	6.03833	0.99998	1
4	3	0	3	1	0.2	0	5.53422	0.90001	1
4	3	0	3	1	0.3	0	5.53422	0.90001	1
4	3	0	3	1	0.4	0	0	0	0
4	3	0	3	1	0.5	0	0	0	0
4	3	0	3	2	0	0	6.03833	0.99998	1
4	3	0	3	2	0.1	0	6.03833	0.99998	1
4	3	0	3	2	0.2	0	6.03833	0.99998	1
4	3	0	3	2	0.3	0	6.03833	0.99998	1
4	3	0	3	2	0.4	0	6.03833	0.99998	1
4	3	0	3	2	0.5	0	5.53422	0.90001	1
4	3	0	3	3	0	0	6.03833	0.99998	1
4	3	0	3	3	0.1	0	6.03833	0.99998	1
4	3	0	3	3	0.2	0	6.03833	0.99998	1
4	3	0	3	3	0.3	0	6.03833	0.99998	1
4	3	0	3	3	0.4	0	6.03833	0.99998	1
4	3	0	3	3	0.5	0	6.03833	0.99998	1
4	3	0.1	1	1	0	0	5.53422	0.90001	1
4	3	0.1	1	1	0.1	0	5.53422	0.90001	1
4	3	0.1	1	1	0.2	0	5.53422	0.90001	1
4	3	0.1	1	1	0.3	0	0	0	0
4	3	0.1	1	1	0.4	0	0	0	0
4	3	0.1	1	1	0.5	0	0	0	0
4	3	0.1	1	2	0	0	6.03833	0.99998	1
4	3	0.1	1	2	0.1	0	6.03833	0.99998	1
4	3	0.1	1	2	0.2	0	6.03833	0.99998	1
4	3	0.1	1	2	0.3	0	6.03833	0.99998	1
4	3	0.1	1	2	0.4	0	6.03833	0.99998	1
4	3	0.1	1	2	0.5	0	5.53422	0.90001	1
4	3	0.1	1	3	0	0	6.03833	0.99998	1
4	3	0.1	1	3	0.1	0	6.03833	0.99998	1
4	3	0.1	1	3	0.2	0	6.03833	0.99998	1
4	3	0.1	1	3	0.3	0	6.03833	0.99998	1
4	3	0.1	1	3	0.4	0	6.03833	0.99998	1
4	3	0.1	1	3	0.5	0	6.03833	0.99998	1
4	3	0.1	2	1	0	0	6.03833	0.99998	1
4	3	0.1	2	1	0.1	0	6.03833	0.99998	1
4	3	0.1	2	1	0.2	0	5.53422	0.90001	1
4	3	0.1	2	1	0.3	0	5.53422	0.90001	1
4	3	0.1	2	1	0.4	0	0	0	0
4	3	0.1	2	1	0.5	0	0	0	0
4	3	0.1	2	2	0	0	6.03833	0.99998	1
4	3	0.1	2	2	0.1	0	6.03833	0.99998	1
4	3	0.1	2	2	0.2	0	6.03833	0.99998	1
4	3	0.1	2	2	0.3	0	6.03833	0.99998	1
4	3	0.1	2	2	0.4	0	6.03833	0.99998	1
4	3	0.1	2	2	0.5	0	5.53422	0.90001	1
4	3	0.1	2	3	0	0	6.03833	0.99998	1
4	3	0.1	2	3	0.1	0	6.03833	0.99998	1
4	3	0.1	2	3	0.2	0	6.03833	0.99998	1
4	3	0.1	2	3	0.3	0	6.03833	0.99998	1
4	3	0.1	2	3	0.4	0	6.03833	0.99998	1
4	3	0.1	2	3	0.5	0	6.03833	0.99998	1
4	3	0.1	3	1	0	0	6.03833	0.99998	1
4	3	0.1	3	1	0.1	0	6.03833	0.99998	1
4	3	0.1	3	1	0.2	0	6.03833	0.99998	1
4	3	0.1	3	1	0.3	0	5.53422	0.90001	1
4	3	0.1	3	1	0.4	0	0	0	0
4	3	0.1	3	1	0.5	0	0	0	0
4	3	0.1	3	2	0	0	6.03833	0.99998	1
4	3	0.1	3	2	0.1	0	6.03833	0.99998	1
4	3	0.1	3	2	0.2	0	6.03833	0.99998	1
4	3	0.1	3	2	0.3	0	6.03833	0.99998	1
4	3	0.1	3	2	0.4	0	6.03833	0.99998	1
4	3	0.1	3	2	0.5	0	6.03833	0.99998	1
4	3	0.1	3	3	0	0	6.03833	0.99998	1
4	3	0.1	3	3	0.1	0	6.03833	0.99998	1
4	3	0.1	3	3	0.2	0	6.03833	0.99998	1
4	3	0.1	3	3	0.3	0	6.03833	0.99998	1
4	3	0.1	3	3	0.4	0	6.03833	0.99998	1
4	3	0.1	3	3	0.5	0	6.03833	0.99998	1
4	3	0.2	1	1	0	0	6.03833	0.99998	1
4	3	0.2	1	1	0.1	0	6.03833	0.99998	1
4	3	0.2	1	1	0.2	0	5.53422	0.90001	1
4	3	0.2	1	1	0.3	0	0	0	0
4	3	0.2	1	1	0.4	0	0	0	0
4	3	0.2	1	1	0.5	0	0	0	0
4	3	0.2	1	2	0	0	6.03833	0.99998	1
4	3	0.2	1	2	0.1	0	6.03833	0.99998	1
4	3	0.2	1	2	0.2	0	6.03833	0.99998	1
4	3	0.2	1	2	0.3	0	6.03833	0.99998	1
4	3	0.2	1	2	0.4	0	6.03833	0.99998	1
4	3	0.2	1	2	0.5	0	6.03833	0.99998	1
4	3	0.2	1	3	0	0	6.03833	0.99998	1
4	3	0.2	1	3	0.1	0	6.03833	0.99998	1
4	3	0.2	1	3	0.2	0	6.03833	0.99998	1
4	3	0.2	1	3	0.3	0	6.03833	0.99998	1
4	3	0.2	1	3	0.4	0	6.03833	0.99998	1
4	3	0.2	1	3	0.5	0	6.03833	0.99998	1
4	3	0.2	2	1	0	0	6.03833	0.99998	1
4	3	0.2	2	1	0.1	0	6.03833	0.99998	1
4	3	0.2	2	1	0.2	0	6.03833	0.99998	1
4	3	0.2	2	1	0.3	0	5.53422	0.90001	1
4	3	0.2	2	1	0.4	0	0	0	0
4	3	0.2	2	1	0.5	0	0	0	0
4	3	0.2	2	2	0	0	6.03833	0.99998	1
4	3	0.2	2	2	0.1	0	6.03833	0.99998	1
4	3	0.2	2	2	0.2	0	6.03833	0.99998	1
4	3	0.2	2	2	0.3	0	6.03833	0.99998	1
4	3	0.2	2	2	0.4	0	6.03833	0.99998	1
4	3	0.2	2	2	0.5	0	6.03833	0.99998	1
4	3	0.2	2	3	0	0	6.03833	0.99998	1
4	3	0.2	2	3	0.1	0	6.03833	0.99998	1
4	3	0.2	2	3	0.2	0	6.03833	0.99998	1
4	3	0.2	2	3	0.3	0	6.03833	0.99998	1
4	3	0.2	2	3	0.4	0	6.03833	0.99998	1
4	3	0.2	2	3	0.5	0	6.03833	0.99998	1
4	3	0.2	3	1	0	0	6.03833	0.99998	1
4	3	0.2	3	1	0.1	0	6.03833	0.99998	1
4	3	0.2	3	1	0.2	0	6.03833	0.99998	1
4	3	0.2	3	1	0.3	0	6.03833	0.99998	1
4	3	0.2	3	1	0.4	0	5.53422	0.90001	1
4	3	0.2	3	1	0.5	0	0	0	0
4	3	0.2	3	2	0	0	6.03833	0.99998	1
4	3	0.2	3	2	0.1	0	6.03833	0.99998	1
4	3	0.2	3	2	0.2	0	6.03833	0.99998	1
4	3	0.2	3	2	0.3	0	6.03833	0.99998	1
4	3	0.2	3	2	0.4	0	6.03833	0.99998	1
4	3	0.2	3	2	0.5	0	6.03833	0.99998	1
4	3	0.2	3	3	0	0	6.03833	0.99998	1
4	3	0.2	3	3	0.1	0	6.03833	0.99998	1
4	3	0.2	3	3	0.2	0	6.03833	0.99998	1
4	3	0.2	3	3	0.3	0	6.03833	0.99998	1
4	3	0.2	3	3	0.4	0	6.03833	0.99998	1
4	3	0.2	3	3	0.5	0	6.03833	0.99998	1
4	3	-0.2	1	1	0	1	0	0	0
4	3	-0.2	1	1	0.1	1	0	0	0
4	3	-0.2	1	1	0.2	1	0	0	0
4	3	-0.2	1	1	0.3	1	0	0	0
4	3	-0.2	1	1	0.4	1	0	0	0
4	3	-0.2	1	1	0.5	1	0	0	0
4	3	-0.2	1	2	0	1	0	0	0
4	3	-0.2	1	2	0.1	1	0	0	0
4	3	-0.2	1	2	0.2	1	0	0	0
4	3	-0.2	1	2	0.3	1	0	0	0
4	3	-0.2	1	2	0.4	1	0	0	0
4	3	-0.2	1	2	0.5	1	0	0	0
4	3	-0.2	1	3	0	1	0	0	0
4	3	-0.2	1	3	0.1	1	0	0	0
4	3	-0.2	1	3	0.2	1	0	0	0
4	3	-0.2	1	3	0.3	1	0	0	0
4	3	-0.2	1	3	0.4	1	0	0	0
4	3	-0.2	1	3	0.5	1	0	0	0
4	3	-0.2	2	1	0	1	0	0	0
4	3	-0.2	2	1	0.1	1	0	0	0
4	3	-0.2	2	1	0.2	1	0	0	0
4	3	-0.2	2	1	0.3	1	0	0	0
4	3	-0.2	2	1	0.4	1	0	0	0
4	3	-0.2	2	1	0.5	1	0	0	0
4	3	-0.2	2	2	0	1	0	0	0
4	3	-0.2	2	2	0.1	1	0	0	0
4	3	-0.2	2	2	0.2	1	0	0	0
4	3	-0.2	2	2	0.3	1	0	0	0
4	3	-0.2	2	2	0.4	1	0	0	0
4	3	-0.2	2	2	0.5	1	0	0	0
4	3	-0.2	2	3	0	1	0	0	0
4	3	-0.2	2	3	0.1	1	0	0	0
4	3	-0.2	2	3	0.2	1	0	0	0
4	3	-0.2	2	3	0.3	1	0	0	0
4	3	-0.2	2	3	0.4	1	0	0	0
4	3	-0.2	2	3	0.5	1	0	0	0
4	3	-0.2	3	1	0	1	0	0	0
4	3	-0.2	3	1	0.1	1	0	0	0
4	3	-0.2	3	1	0.2	1	0	0	0
4	3	-0.2	3	1	0.3	1	0	0	0
4	3	-0.2	3	1	0.4	1	0	0	0
4	3	-0.2	3	1	0.5	1	0	0	0
4	3	-0.2	3	2	0	1	0	0	0
4	3	-0.2	3	2	0.1	1	0	0	0
4	3	-0.2	3	2	0.2	1	0	0	0
4	3	-0.2	3	2	0.3	1	0	0	0
4	3	-0.2	3	2	0.4	1	0	0	0
4	3	-0.2	3	2	0.5	1	0	0	0
4	3	-0.2	3	3	0	1	5.92217	0.69999	1
4	3	-0.2	3	3	0.1	1	0	0	0
4	3	-0.2	3	3	0.2	1	0	0	0
4	3	-0.2	3	3	0.3	1	0	0	0
4	3	-0.2	3	3	0.4	1	0	0	0
4	3	-0.2	3	3	0.5	1	0	0	0
4	3	-0.1	1	1	0	1	0	0	0
4	3	-0.1	1	1	0.1	1	0	0	0
4	3	-0.1	1	1	0.2	1	0	0	0
4	3	-0.1	1	1	0.3	1	0	0	0
4	3	-0.1	1	1	0.4	1	0	0	0
4	3	-0.1	1	1	0.5	1	0	0	0
4	3	-0.1	1	2	0	1	0	0	0
4	3	-0.1	1	2	0.1	1	0	0	0
4	3	-0.1	1	2	0.2	1	0	0	0
4	3	-0.1	1	2	0.3	1	0	0	0
4	3	-0.1	1	2	0.4	1	0	0	0
4	3	-0.1	1	2	0.5	1	0	0	0
4	3	-0.1	1	3	0	1	5.92217	0.69999	1
4	3	-0.1	1	3	0.1	1	0	0	0
4	3	-0.1	1	3	0.2	1	0	0	0
4	3	-0.1	1	3	0.3	1	0	0	0
4	3	-0.1	1	3	0.4	1	0	0	0
4	3	-0.1	1	3	0.5	1	0	0	0
4	3	-0.1	2	1	0	1	0	0	0
4	3	-0.1	2	1	0.1	1	0	0	0
4	3	-0.1	2	1	0.2	1	0	0	0
4	3	-0.1	2	1	0.3	1	0	0	0
4	3	-0.1	2	1	0.4	1	0	0	0
4	3	-0.1	2	1	0.5	1	0	0	0
4	3	-0.1	2	2	0	1	0	0	0
4	3	-0.1	2	2	0.1	1	0	0	0
4	3	-0.1	2	2	0.2	1	0	0	0
4	3	-0.1	2	2	0.3	1	0	0	0
4	3	-0.1	2	2	0.4	1	0	0	0
4	3	-0.1	2	2	0.5	1	0	0	0
4	3	-0.1	2	3	0	1	6.7645	0.90001	1
4	3	-0.1	2	3	0.1	1	5.14764	0.50002	1
4	3	-0.1	2	3	0.2	1	0	0	0
4	3	-0.1	2	3	0.3	1	0	0	0
4	3	-0.1	2	3	0.4	1	0	0	0
4	3	-0.1	2	3	0.5	1	0	0	0
4	3	-0.1	3	1	0	1	0	0	0
4	3	-0.1	3	1	0.1	1	0	0	0
4	3	-0.1	3	1	0.2	1	0	0	0
4	3	-0.1	3	1	0.3	1	0	0	0
4	3	-0.1	3	1	0.4	1	0	0	0
4	3	-0.1	3	1	0.5	1	0	0	0
4	3	-0.1	3	2	0	1	0	0	0
4	3	-0.1	3	2	0.1	1	0	0	0
4	3	-0.1	3	2	0.2	1	0	0	0
4	3	-0.1	3	2	0.3	1	0	0	0
4	3	-0.1	3	2	0.4	1	0	0	0
4	3	-0.1	3	2	0.5	1	0	0	0
4	3	-0.1	3	3	0	1	6.7645	0.90001	1
4	3	-0.1	3	3	0.1	1	6.7645	0.90001	1
4	3	-0.1	3	3	0.2	1	0	0	0
4	3	-0.1	3	3	0.3	1	0	0	0
4	3	-0.1	3	3	0.4	1	0	0	0
4	3	-0.1	3	3	0.5	1	0	0	0
4	3	0	1	1	0	1	0	0	0
4	3	0	1	1	0.1	1	0	0	0
4	3	0	1	1	0.2	1	0	0	0
4	3	0	1	1	0.3	1	0	0	0
4	3	0	1	1	0.4	1	0	0	0
4	3	0	1	1	0.5	1	0	0	0
4	3	0	1	2	0	1	0	0	0
4	3	0	1	2	0.1	1	0	0	0
4	3	0	1	2	0.2	1	0	0	0
4	3	0	1	2	0.3	1	0	0	0
4	3	0	1	2	0.4	1	0	0	0
4	3	0	1	2	0.5	1	0	0	0
4	3	0	1	3	0	1	6.7645	0.90001	1
4	3	0	1	3	0.1	1	6.29505	0.80002	1
4	3	0	1	3	0.2	1	0	0	0
4	3	0	1	3	0.3	1	0	0	0
4	3	0	1	3	0.4	1	0	0	0
4	3	0	1	3	0.5	1	0	0	0
4	3	0	2	1	0	1	0	0	0
4	3	0	2	1	0.1	1	0	0	0
4	3	0	2	1	0.2	1	0	0	0
4	3	0	2	1	0.3	1	0	0	0
4	3	0	2	1	0.4	1	0	0	0
4	3	0	2	1	0.5	1	0	0	0
4	3	0	2	2	0	1	0	0	0
4	3	0	2	2	0.1	1	0	0	0
4	3	0	2	2	0.2	1	0	0	0
4	3	0	2	2	0.3	1	0	0	0
4	3	0	2	2	0.4	1	0	0	0
4	3	0	2	2	0.5	1	0	0	0
4	3	0	2	3	0	1	6.7645	0.90001	1
4	3	0	2	3	0.1	1	6.7645	0.90001	1
4	3	0	2	3	0.2	1	6.29505	0.80002	1
4	3	0	2	3	0.3	1	0	0	0
4	3	0	2	3	0.4	1	0	0	0
4	3	0	2	3	0.5	1	0	0	0
4	3	0	3	1	0	1	0	0	0
4	3	0	3	1	0.1	1	0	0	0
4	3	0	3	1	0.2	1	0	0	0
4	3	0	3	1	0.3	1	0	0	0
4	3	0	3	1	0.4	1	0	0	0
4	3	0	3	1	0.5	1	0	0	0
4	3	0	3	2	0	1	5.92217	0.69999	1
4	3	0	3	2	0.1	1	0	0	0
4	3	0	3	2	0.2	1	0	0	0
4	3	0	3	2	0.3	1	0	0	0
4	3	0	3	2	0.4	1	0	0	0
4	3	0	3	2	0.5	1	0	0	0
4	3	0	3	3	0	1	6.7645	0.90001	1
4	3	0	3	3	0.1	1	6.7645	0.90001	1
4	3	0	3	3	0.2	1	6.7645	0.90001	1
4	3	0	3	3	0.3	1	0	0	0
4	3	0	3	3	0.4	1	0	0	0
4	3	0	3	3	0.5	1	0	0	0
4	3	0.1	1	1	0	1	0	0	0
4	3	0.1	1	1	0.1	1	0	0	0
4	3	0.1	1	1	0.2	1	0	0	0
4	3	0.1	1	1	0.3	1	0	0	0
4	3	0.1	1	1	0.4	1	0	0	0
4	3	0.1	1	1	0.5	1	0	0	0
4	3	0.1	1	2	0	1	0	0	0
4	3	0.1	1	2	0.1	1	0	0	0
4	3	0.1	1	2	0.2	1	0	0	0
4	3	0.1	1	2	0.3	1	0	0	0
4	3	0.1	1	2	0.4	1	0	0	0
4	3	0.1	1	2	0.5	1	0	0	0
4	3	0.1	1	3	0	1	6.7645	0.90001	1
4	3	0.1	1	3	0.1	1	6.7645	0.90001	1
4	3	0.1	1	3	0.2	1	6.7645	0.90001	1
4	3	0.1	1	3	0.3	1	0	0	0
4	3	0.1	1	3	0.4	1	0	0	0
4	3	0.1	1	3	0.5	1	0	0	0
4	3	0.1	2	1	0	1	0	0	0
4	3	0.1	2	1	0.1	1	0	0	0
4	3	0.1	2	1	0.2	1	0	0	0
4	3	0.1	2	1	0.3	1	0	0	0
4	3	0.1	2	1	0.4	1	0	0	0
4	3	0.1	2	1	0.5	1	0	0	0
4	3	0.1	2	2	0	1	6.7645	0.90001	1
4	3	0.1	2	2	0.1	1	0	0	0
4	3	0.1	2	2	0.2	1	0	0	0
4	3	0.1	2	2	0.3	1	0	0	0
4	3	0.1	2	2	0.4	1	0	0	0
4	3	0.1	2	2	0.5	1	0	0	0
4	3	0.1	2	3	0	1	7.36873	0.99998	1
4	3	0.1	2	3	0.1	1	6.7645	0.90001	1
4	3	0.1	2	3	0.2	1	6.7645	0.90001	1
4	3	0.1	2	3	0.3	1	6.29505	0.80002	1
4	3	0.1	2	3	0.4	1	0	0	0
4	3	0.1	2	3	0.5	1	0	0	0
4	3	0.1	3	1	0	1	0	0	0
4	3	0.1	3	1	0.1	1	0	0	0
4	3	0.1	3	1	0.2	1	0	0	0
4	3	0.1	3	1	0.3	1	0	0	0
4	3	0.1	3	1	0.4	1	0	0	0
4	3	0.1	3	1	0.5	1	0	0	0
4	3	0.1	3	2	0	1	6.7645	0.90001	1
4	3	0.1	3	2	0.1	1	6.29505	0.80002	1
4	3	0.1	3	2	0.2	1	0	0	0
4	3	0.1	3	2	0.3	1	0	0	0
4	3	0.1	3	2	0.4	1	0	0	0
4	3	0.1	3	2	0.5	1	0	0	0
4	3	0.1	3	3	0	1	7.36873	0.99998	1
4	3	0.1	3	3	0.1	1	7.36873	0.99998	1
4	3	0.1	3	3	0.2	1	6.7645	0.90001	1
4	3	0.1	3	3	0.3	1	6.7645	0.90001	1
4	3	0.1	3	3	0.4	1	0	0	0
4	3	0.1	3	3	0.5	1	0	0	0
4	3	0.2	1	1	0	1	0	0	0
4	3	0.2	1	1	0.1	1	0	0	0
4	3	0.2	1	1	0.2	1	0	0	0
4	3	0.2	1	1	0.3	1	0	0	0
4	3	0.2	1	1	0.4	1	0	0	0
4	3	0.2	1	1	0.5	1	0	0	0
4	3	0.2	1	2	0	1	6.7645	0.90001	1
4	3	0.2	1	2	0.1	1	5.92217	0.69999	1
4	3	0.2	1	2	0.2	1	0	0	0
4	3	0.2	1	2	0.3	1	0	0	0
4	3	0.2	1	2	0.4	1	0	0	0
4	3	0.2	1	2	0.5	1	0	0	0
4	3	0.2	1	3	0	1	7.36873	0.99998	1
4	3	0.2	1	3	0.1	1	6.7645	0.90001	1
4	3	0.2	1	3	0.2	1	6.7645	0.90001	1
4	3	0.2	1	3	0.3	1	6.7645	0.90001	1
4	3	0.2	1	3	0.4	1	0	0	0
4	3	0.2	1	3	0.5	1	0	0	0
4	3	0.2	2	1	0	1	0	0	0
4	3	0.2	2	1	0.1	1	0	0	0
4	3	0.2	2	1	0.2	1	0	0	0
4	3	0.2	2	1	0.3	1	0	0	0
4	3	0.2	2	1	0.4	1	0	0	0
4	3	0.2	2	1	0.5	1	0	0	0
4	3	0.2	2	2	0	1	6.7645	0.90001	1
4	3	0.2	2	2	0.1	1	6.7645	0.90001	1
4	3	0.2	2	2	0.2	1	0	0	0
4	3	0.2	2	2	0.3	1	0	0	0
4	3	0.2	2	2	0.4	1	0	0	0
4	3	0.2	2	2	0.5	1	0	0	0
4	3	0.2	2	3	0	1	7.36873	0.99998	1
4	3	0.2	2	3	0.1	1	7.36873	0.99998	1
4	3	0.2	2	3	0.2	1	6.7645	0.90001	1
4	3	0.2	2	3	0.3	1	6.7645	0.90001	1
4	3	0.2	2	3	0.4	1	6.29505	0.80002	1
4	3	0.2	2	3	0.5	1	0	0	0
4	3	0.2	3	1	0	1	0	0	0
4	3	0.2	3	1	0.1	1	0	0	0
4	3	0.2	3	1	0.2	1	0	0	0
4	3	0.2	3	1	0.3	1	0	0	0
4	3	0.2	3	1	0.4	1	0	0	0
4	3	0.2	3	1	0.5	1	0	0	0
4	3	0.2	3	2	0	1	6.7645	0.90001	1
4	3	0.2	3	2	0.1	1	6.7645	0.90001	1
4	3	0.2	3	2	0.2	1	6.7645	0.90001	1
4	3	0.2	3	2	0.3	1	0	0	0
4	3	0.2	3	2	0.4	1	0	0	0
4	3	0.2	3	2	0.5	1	0	0	0
4	3	0.2	3	3	0	1	7.36873	0.99998	1
4	3	0.2	3	3	0.1	1	7.36873	0.99998	1
4	3	0.2	3	3	0.2	1	7.36873	0.99998	1
4	3	0.2	3	3	0.3	1	6.7645	0.90001	1
4	3	0.2	3	3	0.4	1	6.7645	0.90001	1
4	3	0.2	3	3	0.5	1	0	0	0
4	3	0.2	3	3	0.1	1	7.36873	0	1
4	3	0.2	3	3	0.2	1	7.36873	0	1
4	3	0.2	3	3	0.3	1	6.7645	0	1
4	3	0.2	3	3	0.4	1	6.7645	0.59997	1
4	3	0.2	3	3	0.5	1	0	0	0
4	3	0.2	3	3	0.4	1	6.7645	0.59997	1
4	3	0.2	3	3	0.5	1	0	0.60003	0
4	1	-0.2	1	1	0	2	0	0	0
4	1	-0.2	1	1	0.1	2	0	0	0
4	1	-0.2	1	1	0.2	2	0	0	0
4	1	-0.2	1	1	0.3	2	0	0	0
4	1	-0.2	1	1	0.4	2	0	0	0
4	1	-0.2	1	1	0.5	2	0	0	0
4	1	-0.2	1	2	0	2	0	0	0
4	1	-0.2	1	2	0.1	2	0	0	0
4	1	-0.2	1	2	0.2	2	0	0	0
4	1	-0.2	1	2	0.3	2	0	0	0
4	1	-0.2	1	2	0.4	2	0	0	0
4	1	-0.2	1	2	0.5	2	0	0	0
4	1	-0.2	1	3	0	2	0	0	0
4	1	-0.2	1	3	0.1	2	0	0	0
4	1	-0.2	1	3	0.2	2	0	0	0
4	1	-0.2	1	3	0.3	2	0	0	0
4	1	-0.2	1	3	0.4	2	0	0	0
4	1	-0.2	1	3	0.5	2	0	0	0
4	1	-0.2	2	1	0	2	0	0	0
4	1	-0.2	2	1	0.1	2	0	0	0
4	1	-0.2	2	1	0.2	2	0	0	0
4	1	-0.2	2	1	0.3	2	0	0	0
4	1	-0.2	2	1	0.4	2	0	0	0
4	1	-0.2	2	1	0.5	2	0	0	0
4	1	-0.2	2	2	0	2	0	0	0
4	1	-0.2	2	2	0.1	2	0	0	0
4	1	-0.2	2	2	0.2	2	0	0	0
4	1	-0.2	2	2	0.3	2	0	0	0
4	1	-0.2	2	2	0.4	2	0	0	0
4	1	-0.2	2	2	0.5	2	0	0	0
4	1	-0.2	2	3	0	2	0	0	0
4	1	-0.2	2	3	0.1	2	0	0	0
4	1	-0.2	2	3	0.2	2	0	0	0
4	1	-0.2	2	3	0.3	2	0	0	0
4	1	-0.2	2	3	0.4	2	0	0	0
4	1	-0.2	2	3	0.5	2	0	0	0
4	1	-0.2	3	1	0	2	0	0	0
4	1	-0.2	3	1	0.1	2	0	0	0
4	1	-0.2	3	1	0.2	2	0	0	0
4	1	-0.2	3	1	0.3	2	0	0	0
4	1	-0.2	3	1	0.4	2	0	0	0
4	1	-0.2	3	1	0.5	2	0	0	0
4	1	-0.2	3	2	0	2	0	0	0
4	1	-0.2	3	2	0.1	2	0	0	0
4	1	-0.2	3	2	0.2	2	0	0	0
4	1	-0.2	3	2	0.3	2	0	0	0
4	1	-0.2	3	2	0.4	2	0	0	0
4	1	-0.2	3	2	0.5	2	0	0	0
4	1	-0.2	3	3	0	2	0	0	0
4	1	-0.2	3	3	0.1	2	0	0	0
4	1	-0.2	3	3	0.2	2	0	0	0
4	1	-0.2	3	3	0.3	2	0	0	0
4	1	-0.2	3	3	0.4	2	0	0	0
4	1	-0.2	3	3	0.5	2	0	0	0
4	1	-0.1	1	1	0	2	0	0	0
4	1	-0.1	1	1	0.1	2	0	0	0
4	1	-0.1	1	1	0.2	2	0	0	0
4	1	-0.1	1	1	0.3	2	0	0	0
4	1	-0.1	1	1	0.4	2	0	0	0
4	1	-0.1	1	1	0.5	2	0	0	0
4	1	-0.1	1	2	0	2	0	0	0
4	1	-0.1	1	2	0.1	2	0	0	0
4	1	-0.1	1	2	0.2	2	0	0	0
4	1	-0.1	1	2	0.3	2	0	0	0
4	1	-0.1	1	2	0.4	2	0	0	0
4	1	-0.1	1	2	0.5	2	0	0	0
4	1	-0.1	1	3	0	2	0	0	0
4	1	-0.1	1	3	0.1	2	0	0	0
4	1	-0.1	1	3	0.2	2	0	0	0
4	1	-0.1	1	3	0.3	2	0	0	0
4	1	-0.1	1	3	0.4	2	0	0	0
4	1	-0.1	1	3	0.5	2	0	0	0
4	1	-0.1	2	1	0	2	0	0	0
4	1	-0.1	2	1	0.1	2	0	0	0
4	1	-0.1	2	1	0.2	2	0	0	0
4	1	-0.1	2	1	0.3	2	0	0	0
4	1	-0.1	2	1	0.4	2	0	0	0
4	1	-0.1	2	1	0.5	2	0	0	0
4	1	-0.1	2	2	0	2	0	0	0
4	1	-0.1	2	2	0.1	2	0	0	0
4	1	-0.1	2	2	0.2	2	0	0	0
4	1	-0.1	2	2	0.3	2	0	0	0
4	1	-0.1	2	2	0.4	2	0	0	0
4	1	-0.1	2	2	0.5	2	0	0	0
4	1	-0.1	2	3	0	2	0	0	0
4	1	-0.1	2	3	0.1	2	0	0	0
4	1	-0.1	2	3	0.2	2	0	0	0
4	1	-0.1	2	3	0.3	2	0	0	0
4	1	-0.1	2	3	0.4	2	0	0	0
4	1	-0.1	2	3	0.5	2	0	0	0
4	1	-0.1	3	1	0	2	0	0	0
4	1	-0.1	3	1	0.1	2	0	0	0
4	1	-0.1	3	1	0.2	2	0	0	0
4	1	-0.1	3	1	0.3	2	0	0	0
4	1	-0.1	3	1	0.4	2	0	0	0
4	1	-0.1	3	1	0.5	2	0	0	0
4	1	-0.1	3	2	0	2	0	0	0
4	1	-0.1	3	2	0.1	2	0	0	0
4	1	-0.1	3	2	0.2	2	0	0	0
4	1	-0.1	3	2	0.3	2	0	0	0
4	1	-0.1	3	2	0.4	2	0	0	0
4	1	-0.1	3	2	0.5	2	0	0	0
4	1	-0.1	3	3	0	2	0	0	0
4	1	-0.1	3	3	0.1	2	0	0	0
4	1	-0.1	3	3	0.2	2	0	0	0
4	1	-0.1	3	3	0.3	2	0	0	0
4	1	-0.1	3	3	0.4	2	0	0	0
4	1	-0.1	3	3	0.5	2	0	0	0
4	1	0	1	1	0	2	0	0	0
4	1	0	1	1	0.1	2	0	0	0
4	1	0	1	1	0.2	2	0	0	0
4	1	0	1	1	0.3	2	0	0	0
4	1	0	1	1	0.4	2	0	0	0
4	1	0	1	1	0.5	2	0	0	0
4	1	0	1	2	0	2	0	0	0
4	1	0	1	2	0.1	2	0	0	0
4	1	0	1	2	0.2	2	0	0	0
4	1	0	1	2	0.3	2	0	0	0
4	1	0	1	2	0.4	2	0	0	0
4	1	0	1	2	0.5	2	0	0	0
4	1	0	1	3	0	2	0	0	0
4	1	0	1	3	0.1	2	0	0	0
4	1	0	1	3	0.2	2	0	0	0
4	1	0	1	3	0.3	2	0	0	0
4	1	0	1	3	0.4	2	0	0	0
4	1	0	1	3	0.5	2	0	0	0
4	1	0	2	1	0	2	0	0	0
4	1	0	2	1	0.1	2	0	0	0
4	1	0	2	1	0.2	2	0	0	0
4	1	0	2	1	0.3	2	0	0	0
4	1	0	2	1	0.4	2	0	0	0
4	1	0	2	1	0.5	2	0	0	0
4	1	0	2	2	0	2	0	0	0
4	1	0	2	2	0.1	2	0	0	0
4	1	0	2	2	0.2	2	0	0	0
4	1	0	2	2	0.3	2	0	0	0
4	1	0	2	2	0.4	2	0	0	0
4	1	0	2	2	0.5	2	0	0	0
4	1	0	2	3	0	2	3.19714	0.99997	1
4	1	0	2	3	0.1	2	0	0	0
4	1	0	2	3	0.2	2	0	0	0
4	1	0	2	3	0.3	2	0	0	0
4	1	0	2	3	0.4	2	0	0	0
4	1	0	2	3	0.5	2	0	0	0
4	1	0	3	1	0	2	0	0	0
4	1	0	3	1	0.1	2	0	0	0
4	1	0	3	1	0.2	2	0	0	0
4	1	0	3	1	0.3	2	0	0	0
4	1	0	3	1	0.4	2	0	0	0
4	1	0	3	1	0.5	2	0	0	0
4	1	0	3	2	0	2	0	0	0
4	1	0	3	2	0.1	2	0	0	0
4	1	0	3	2	0.2	2	0	0	0
4	1	0	3	2	0.3	2	0	0	0
4	1	0	3	2	0.4	2	0	0	0
4	1	0	3	2	0.5	2	0	0	0
4	1	0	3	3	0	2	-2.23889	1.49999	1
4	1	0	3	3	0.1	2	0	0	0
4	1	0	3	3	0.2	2	0	0	0
4	1	0	3	3	0.3	2	0	0	0
4	1	0	3	3	0.4	2	0	0	0
4	1	0	3	3	0.5	2	0	0	0
4	1	0.1	1	1	0	2	0	0	0
4	1	0.1	1	1	0.1	2	0	0	0
4	1	0.1	1	1	0.2	2	0	0	0
4	1	0.1	1	1	0.3	2	0	0	0
4	1	0.1	1	1	0.4	2	0	0	0
4	1	0.1	1	1	0.5	2	0	0	0
4	1	0.1	1	2	0	2	0	0	0
4	1	0.1	1	2	0.1	2	0	0	0
4	1	0.1	1	2	0.2	2	0	0	0
4	1	0.1	1	2	0.3	2	0	0	0
4	1	0.1	1	2	0.4	2	0	0	0
4	1	0.1	1	2	0.5	2	0	0	0
4	1	0.1	1	3	0	2	-2.23889	1.39998	1
4	1	0.1	1	3	0.1	2	0	0	0
4	1	0.1	1	3	0.2	2	0	0	0
4	1	0.1	1	3	0.3	2	0	0	0
4	1	0.1	1	3	0.4	2	0	0	0
4	1	0.1	1	3	0.5	2	0	0	0
4	1	0.1	2	1	0	2	0	0	0
4	1	0.1	2	1	0.1	2	0	0	0
4	1	0.1	2	1	0.2	2	0	0	0
4	1	0.1	2	1	0.3	2	0	0	0
4	1	0.1	2	1	0.4	2	0	0	0
4	1	0.1	2	1	0.5	2	0	0	0
4	1	0.1	2	2	0	2	0	0	0
4	1	0.1	2	2	0.1	2	0	0	0
4	1	0.1	2	2	0.2	2	0	0	0
4	1	0.1	2	2	0.3	2	0	0	0
4	1	0.1	2	2	0.4	2	0	0	0
4	1	0.1	2	2	0.5	2	0	0	0
4	1	0.1	2	3	0	2	-2.32318	1.59998	1
4	1	0.1	2	3	0.1	2	3.19714	0.99997	1
4	1	0.1	2	3	0.2	2	0	0	0
4	1	0.1	2	3	0.3	2	0	0	0
4	1	0.1	2	3	0.4	2	0	0	0
4	1	0.1	2	3	0.5	2	0	0	0
4	1	0.1	3	1	0	2	0	0	0
4	1	0.1	3	1	0.1	2	0	0	0
4	1	0.1	3	1	0.2	2	0	0	0
4	1	0.1	3	1	0.3	2	0	0	0
4	1	0.1	3	1	0.4	2	0	0	0
4	1	0.1	3	1	0.5	2	0	0	0
4	1	0.1	3	2	0	2	0	0	0
4	1	0.1	3	2	0.1	2	0	0	0
4	1	0.1	3	2	0.2	2	0	0	0
4	1	0.1	3	2	0.3	2	0	0	0
4	1	0.1	3	2	0.4	2	0	0	0
4	1	0.1	3	2	0.5	2	0	0	0
4	1	0.1	3	3	0	2	-2.30574	1.69997	1
4	1	0.1	3	3	0.1	2	-2.23889	1.49999	1
4	1	0.1	3	3	0.2	2	0	0	0
4	1	0.1	3	3	0.3	2	0	0	0
4	1	0.1	3	3	0.4	2	0	0	0
4	1	0.1	3	3	0.5	2	0	0	0
4	1	0.2	1	1	0	2	0	0	0
4	1	0.2	1	1	0.1	2	0	0	0
4	1	0.2	1	1	0.2	2	0	0	0
4	1	0.2	1	1	0.3	2	0	0	0
4	1	0.2	1	1	0.4	2	0	0	0
4	1	0.2	1	1	0.5	2	0	0	0
4	1	0.2	1	2	0	2	0	0	0
4	1	0.2	1	2	0.1	2	0	0	0
4	1	0.2	1	2	0.2	2	0	0	0
4	1	0.2	1	2	0.3	2	0	0	0
4	1	0.2	1	2	0.4	2	0	0	0
4	1	0.2	1	2	0.5	2	0	0	0
4	1	0.2	1	3	0	2	-2.32318	1.59998	1
4	1	0.2	1	3	0.1	2	-2.59642	1.19998	1
4	1	0.2	1	3	0.2	2	0	0	0
4	1	0.2	1	3	0.3	2	0	0	0
4	1	0.2	1	3	0.4	2	0	0	0
4	1	0.2	1	3	0.5	2	0	0	0
4	1	0.2	2	1	0	2	0	0	0
4	1	0.2	2	1	0.1	2	0	0	0
4	1	0.2	2	1	0.2	2	0	0	0
4	1	0.2	2	1	0.3	2	0	0	0
4	1	0.2	2	1	0.4	2	0	0	0
4	1	0.2	2	1	0.5	2	0	0	0
4	1	0.2	2	2	0	2	0	0	0
4	1	0.2	2	2	0.1	2	0	0	0
4	1	0.2	2	2	0.2	2	0	0	0
4	1	0.2	2	2	0.3	2	0	0	0
4	1	0.2	2	2	0.4	2	0	0	0
4	1	0.2	2	2	0.5	2	0	0	0
4	1	0.2	2	3	0	2	-2.30574	1.79996	1
4	1	0.2	2	3	0.1	2	-2.23889	1.49999	1
4	1	0.2	2	3	0.2	2	3.19714	0.99997	1
4	1	0.2	2	3	0.3	2	0	0	0
4	1	0.2	2	3	0.4	2	0	0	0
4	1	0.2	2	3	0.5	2	0	0	0
4	1	0.2	3	1	0	2	0	0	0
4	1	0.2	3	1	0.1	2	0	0	0
4	1	0.2	3	1	0.2	2	0	0	0
4	1	0.2	3	1	0.3	2	0	0	0
4	1	0.2	3	1	0.4	2	0	0	0
4	1	0.2	3	1	0.5	2	0	0	0
4	1	0.2	3	2	0	2	0	0	0
4	1	0.2	3	2	0.1	2	0	0	0
4	1	0.2	3	2	0.2	2	0	0	0
4	1	0.2	3	2	0.3	2	0	0	0
4	1	0.2	3	2	0.4	2	0	0	0
4	1	0.2	3	2	0.5	2	0	0	0
4	1	0.2	3	3	0	2	-2.42596	2.1	1
4	1	0.2	3	3	0.1	2	-2.32318	1.59998	1
4	1	0.2	3	3	0.2	2	-2.59642	1.19998	1
4	1	0.2	3	3	0.3	2	0	0	0
4	1	0.2	3	3	0.4	2	0	0	0
4	1	0.2	3	3	0.5	2	0	0	0
4	2	-0.2	1	1	0	2	5.7487	1.89994	1
4	2	-0.2	1	1	0.1	2	5.7487	1.89994	1
4	2	-0.2	1	1	0.2	2	5.61722	1.69995	1
4	2	-0.2	1	1	0.3	2	5.61722	1.69995	1
4	2	-0.2	1	1	0.4	2	5.74665	1.49994	1
4	2	-0.2	1	1	0.5	2	5.74665	1.49994	1
4	2	-0.2	1	2	0	2	6.92784	2.69998	1
4	2	-0.2	1	2	0.1	2	6.69072	2.59996	1
4	2	-0.2	1	2	0.2	2	6.54082	2.49999	1
4	2	-0.2	1	2	0.3	2	6.2795	2.29999	1
4	2	-0.2	1	2	0.4	2	5.96171	2.10002	1
4	2	-0.2	1	2	0.5	2	5.7487	1.89994	1
4	2	-0.2	1	3	0	2	7.79855	3.10002	1
4	2	-0.2	1	3	0.1	2	7.54906	2.99999	1
4	2	-0.2	1	3	0.2	2	7.15865	2.80001	1
4	2	-0.2	1	3	0.3	2	6.92784	2.69998	1
4	2	-0.2	1	3	0.4	2	6.69072	2.59996	1
4	2	-0.2	1	3	0.5	2	6.2795	2.29999	1
4	2	-0.2	2	1	0	2	5.96171	2.10002	1
4	2	-0.2	2	1	0.1	2	5.96171	2.10002	1
4	2	-0.2	2	1	0.2	2	5.7487	1.89994	1
4	2	-0.2	2	1	0.3	2	5.61722	1.69995	1
4	2	-0.2	2	1	0.4	2	5.61722	1.69995	1
4	2	-0.2	2	1	0.5	2	5.74665	1.49994	1
4	2	-0.2	2	2	0	2	7.15865	2.80001	1
4	2	-0.2	2	2	0.1	2	6.69072	2.59996	1
4	2	-0.2	2	2	0.2	2	6.69072	2.59996	1
4	2	-0.2	2	2	0.3	2	6.39458	2.39998	1
4	2	-0.2	2	2	0.4	2	5.96171	2.10002	1
4	2	-0.2	2	2	0.5	2	5.7487	1.89994	1
4	2	-0.2	2	3	0	2	8.0994	3.19997	1
4	2	-0.2	2	3	0.1	2	7.54906	2.99999	1
4	2	-0.2	2	3	0.2	2	7.35856	2.89998	1
4	2	-0.2	2	3	0.3	2	7.15865	2.80001	1
4	2	-0.2	2	3	0.4	2	6.69072	2.59996	1
4	2	-0.2	2	3	0.5	2	6.54082	2.49999	1
4	2	-0.2	3	1	0	2	6.2795	2.29999	1
4	2	-0.2	3	1	0.1	2	6.09822	2.19998	1
4	2	-0.2	3	1	0.2	2	5.96171	2.10002	1
4	2	-0.2	3	1	0.3	2	5.7487	1.89994	1
4	2	-0.2	3	1	0.4	2	5.61722	1.69995	1
4	2	-0.2	3	1	0.5	2	5.61722	1.69995	1
4	2	-0.2	3	2	0	2	7.15865	2.80001	1
4	2	-0.2	3	2	0.1	2	6.92784	2.69998	1
4	2	-0.2	3	2	0.2	2	6.69072	2.59996	1
4	2	-0.2	3	2	0.3	2	6.54082	2.49999	1
4	2	-0.2	3	2	0.4	2	6.2795	2.29999	1
4	2	-0.2	3	2	0.5	2	5.96171	2.10002	1
4	2	-0.2	3	3	0	2	8.0994	3.19997	1
4	2	-0.2	3	3	0.1	2	7.79855	3.10002	1
4	2	-0.2	3	3	0.2	2	7.54906	2.99999	1
4	2	-0.2	3	3	0.3	2	7.15865	2.80001	1
4	2	-0.2	3	3	0.4	2	6.69072	2.59996	1
4	2	-0.2	3	3	0.5	2	6.54082	2.49999	1
4	2	-0.1	1	1	0	2	6.09822	2.19998	1
4	2	-0.1	1	1	0.1	2	5.96171	1.99997	1
4	2	-0.1	1	1	0.2	2	5.7487	1.89994	1
4	2	-0.1	1	1	0.3	2	5.7487	1.89994	1
4	2	-0.1	1	1	0.4	2	5.61722	1.69995	1
4	2	-0.1	1	1	0.5	2	5.61722	1.69995	1
4	2	-0.1	1	2	0	2	7.15865	2.80001	1
4	2	-0.1	1	2	0.1	2	6.92784	2.69998	1
4	2	-0.1	1	2	0.2	2	6.69072	2.59996	1
4	2	-0.1	1	2	0.3	2	6.54082	2.49999	1
4	2	-0.1	1	2	0.4	2	6.2795	2.29999	1
4	2	-0.1	1	2	0.5	2	5.96171	1.99997	1
4	2	-0.1	1	3	0	2	8.0994	3.19997	1
4	2	-0.1	1	3	0.1	2	7.79855	3.10002	1
4	2	-0.1	1	3	0.2	2	7.54906	2.99999	1
4	2	-0.1	1	3	0.3	2	7.35856	2.89998	1
4	2	-0.1	1	3	0.4	2	6.92784	2.69998	1
4	2	-0.1	1	3	0.5	2	6.69072	2.59996	1
4	2	-0.1	2	1	0	2	6.54082	2.49999	1
4	2	-0.1	2	1	0.1	2	6.2795	2.29999	1
4	2	-0.1	2	1	0.2	2	5.96171	2.10002	1
4	2	-0.1	2	1	0.3	2	5.7487	1.89994	1
4	2	-0.1	2	1	0.4	2	5.7487	1.89994	1
4	2	-0.1	2	1	0.5	2	5.61722	1.69995	1
4	2	-0.1	2	2	0	2	7.35856	2.89998	1
4	2	-0.1	2	2	0.1	2	7.15865	2.80001	1
4	2	-0.1	2	2	0.2	2	6.92784	2.69998	1
4	2	-0.1	2	2	0.3	2	6.69072	2.59996	1
4	2	-0.1	2	2	0.4	2	6.54082	2.49999	1
4	2	-0.1	2	2	0.5	2	6.09822	2.19998	1
4	2	-0.1	2	3	0	2	8.0994	3.19997	1
4	2	-0.1	2	3	0.1	2	8.0994	3.19997	1
4	2	-0.1	2	3	0.2	2	7.79855	3.10002	1
4	2	-0.1	2	3	0.3	2	7.35856	2.89998	1
4	2	-0.1	2	3	0.4	2	7.15865	2.80001	1
4	2	-0.1	2	3	0.5	2	6.69072	2.59996	1
4	2	-0.1	3	1	0	2	6.54082	2.49999	1
4	2	-0.1	3	1	0.1	2	6.54082	2.49999	1
4	2	-0.1	3	1	0.2	2	6.2795	2.29999	1
4	2	-0.1	3	1	0.3	2	5.96171	2.10002	1
4	2	-0.1	3	1	0.4	2	5.7487	1.89994	1
4	2	-0.1	3	1	0.5	2	5.58125	1.79997	1
4	2	-0.1	3	2	0	2	7.54906	2.99999	1
4	2	-0.1	3	2	0.1	2	7.35856	2.89998	1
4	2	-0.1	3	2	0.2	2	7.15865	2.80001	1
4	2	-0.1	3	2	0.3	2	6.69072	2.59996	1
4	2	-0.1	3	2	0.4	2	6.54082	2.49999	1
4	2	-0.1	3	2	0.5	2	6.2795	2.29999	1
[truncated: 438 more rows]
